# Supplementary material for: Titanium nanoparticles activate a transcriptional response in Arabidopsis that enhances tolerance to low phosphate, osmotic stress and pathogen infection
Source: Front Plant Sci. 2022 Nov 1;13:994523. doi: 10.3389/fpls.2022.994523 (PMC9664069; doi:10.3389/fpls.2022.994523)
Supplement: Supplementary file 1 [file DataSheet_1.xlsx]

## Sheet: S1 FASTQC summary
ID	Sample	Days of exposure	Tissue	Treatment	Raw reads	Raw data	Effective(%)	Error(%)	Q20(%)	Q30(%)	GC(%)
A1	Ctrl-R-10D-1	10	Root	Control	46254388	6.9	98.38	0.03	98.05	94.09	46.37
A2	Ctrl-R-10D-2	10	Root	Control	52590386	7.9	97.88	0.02	98.26	94.72	45.62
A3	Ctrl-R-10D-3	10	Root	Control	46555858	7	97.6	0.02	98.22	94.63	45.57
B1	Ti-R-10D-1	10	Root	Ti 2mM	50811434	7.6	98.56	0.03	98	93.99	46.13
B2	Ti-R-10D-2	10	Root	Ti 2mM	43681908	6.6	97.23	0.03	97.73	93.53	44.91
B3	Ti-R-10D-3	10	Root	Ti 2mM	44125934	6.6	96.82	0.03	97.74	93.53	45.13
G1	Ctrl-R-03D-1	3	Root	Control	46139290	6.9	98.01	0.02	98.09	94.42	45.08
G2	Ctrl-R-03D-2	3	Root	Control	45749592	6.9	98.22	0.02	98.17	94.51	45.09
G3	Ctrl-R-03D-3	3	Root	Control	48000662	7.2	97.9	0.02	98.25	94.75	45.1
H1	Ti-R-03D-1	3	Root	Ti 2mM	44988588	6.7	98.26	0.03	98.02	94.02	44.96
H2	Ti-R-03D-2	3	Root	Ti 2mM	39657354	5.9	97.65	0.02	98.28	94.86	45.34
H3	Ti-R-03D-3	3	Root	Ti 2mM	41846834	6.3	98.43	0.03	98	94	45.12
E1	Ctrl-S-10D-1	10	Shoot	Control	47453660	7.1	98.44	0.02	98.45	95.13	46.3
E2	Ctrl-S-10D-2	10	Shoot	Control	48609994	7.3	98.1	0.02	98.19	94.41	46.45
E3	Ctrl-S-10D-3	10	Shoot	Control	47146214	7.1	97.88	0.02	98.45	95.16	46.5
F1	Ti-S-10D-1		Shoot	Ti 2mM	46524324	7	97.94	0.02	98.2	94.43	46.46
F2	Ti-S-10D-2	10	Shoot	Ti 2mM	53332946	8	98.7	0.02	98.11	94.14	46.45
F3	Ti-S-10D-3	10	Shoot	Ti 2mM	46100340	6.9	97.83	0.02	98.36	94.92	46.55
K1	Ctrl-S-03D-1	3	Shoot	Control	55341806	8.3	98.47	0.02	98.1	94.19	46.8
K2	Ctrl-S-03D-2	3	Shoot	Control	40726978	6.1	97.88	0.02	98.38	95.02	46.7
K3	Ctrl-S-03D-3	3	Shoot	Control	48290050	7.2	98.46	0.02	98.37	94.91	46.49
L1	Ti-S-03D-1	3	Shoot	Ti 2mM	42764236	6.4	98.63	0.02	98.27	94.57	46.6
L2	Ti-S-03D-2	3	Shoot	Ti 2mM	39433326	5.9	98.02	0.02	98.42	95.07	46.52
L3	Ti-S-03D-3	3	Shoot	Ti 2mM	46818260	7	97.78	0.02	98.09	94.41	46.12

## Sheet: S2 aligment summary
Name	Tissue	Treatment	Day	Biological replicate	Number of processed reads	Kallisto pseudo-aligned reads	% of pseudo aligment
Ctrl-R-10D-1	Root	Control	10	1	23122137	20001150	86.5
Ctrl-R-10D-2	Root	Control	10	2	26288963	24340510	92.6
Ctrl-R-10D-3	Root	Control	10	3	23272455	21492689	92.4
Ti-R-10D-1	Root	Ti	10	1	25400614	22368015	88.1
Ti-R-10D-2	Root	Ti	10	2	21834784	20948383	95.9
Ti-R-10D-3	Root	Ti	10	3	22056240	21089130	95.6
Ctrl-R-03D-1	Shoot	Control	10	1	23716478	22953923	96.8
Ctrl-R-03D-2	Shoot	Control	10	2	24292301	23541436	96.9
Ctrl-R-03D-3	Shoot	Control	10	3	23558942	22665259	96.2
Ti-R-03D-1	Shoot	Ti	10	1	23250481	22563022	97
Ti-R-03D-2	Shoot	Ti	10	2	26651986	25797271	96.8
Ti-R-03D-3	Shoot	Ti	10	3	23037160	22322205	96.9
Ctrl-S-10D-1	Root	Control	3	1	23063048	21996344	95.4
Ctrl-S-10D-2	Root	Control	3	2	22869249	22012491	96.3
Ctrl-S-10D-3	Root	Control	3	3	23994305	23113684	96.3
Ti-S-10D-1	Root	Ti	3	1	22489898	21730727	96.6
Ti-S-10D-2	Root	Ti	3	2	19823955	18594693	93.8
Ti-S-10D-3	Root	Ti	3	3	20918521	20084559	96
Ctrl-S-03D-1	Shoot	Control	3	1	27654762	25759573	93.1
Ctrl-S-03D-2	Shoot	Control	3	2	20351254	19558100	96.1
Ctrl-S-03D-3	Shoot	Control	3	3	24129596	23298306	96.6
Ti-S-03D-1	Shoot	Ti	3	1	21370113	20701126	96.9
Ti-S-03D-2	Shoot	Ti	3	2	19705878	19156862	97.2
Ti-S-03D-3	Shoot	Ti	3	3	23396624	22720298	97.1

## Sheet: S3 Root +Ti vs Ctrl Up 10D
Locus Identifier	Gene Model Name	Gene Model Description	Gene Model Type	Primary Gene Symbol	All Gene Symbols	logFC	logCPM	LR	PValue
AT5G65950	AT5G65950.1	TRAPPIII complex protein which regulates TGN integrity, by altered TGN/EE association of several residents, including SYNTAXIN OF PLANTS 61 (SYP61), and altered vesicle morphology. Involved in regulation of endosomal function and salt stress response.	protein_coding	RESPONSE TO OLIGOGALACTURONIDE-2 (ROG2)	(TRAPPC11);RESPONSE TO OLIGOGALACTURONIDE-2 (ROG2)	0.239084	6.77753	8.0172	0.00463352
AT1G36730	AT1G36730.1	Translation initiation factor IF2/IF5;(source:Araport11)	protein_coding			0.24172	7.66432	8.47032	0.00360989
AT2G20010	AT2G20010.2	Gls protein (DUF810);(source:Araport11)	protein_coding			0.248557	5.82391	8.02993	0.00460106
AT2G23980	AT2G23980.1	Encodes a cyclic GMP-activated non-selective cation channel in the plasma membrane of guard cells. Required for constitutive growth of root hairs as Ca2+-permeable channels.	protein_coding	CYCLIC NUCLEOTIDE-GATED CHANNEL 6 (CNGC6)	CYCLIC NUCLEOTIDE-GATED CHANNEL 6 (ATCNGC6);CYCLIC NUCLEOTIDE-GATED CHANNEL 6 (CNGC6);CYCLIC NUCLEOTIDE GATED CHANNEL 6 (CNGC6)	0.248756	6.04285	8.74763	0.00310004
AT5G23450	AT5G23450.3	Encodes a sphingosine kinase that specifically phosphorylates D-erythro-dihydrosphingosine (DHS), but not N-acetyl-DHS or D-threo-DHS. It also also phosphorylates D-erythro-sphingosine, trans-4, trans-8-sphingadienine and phytosphingosine.	protein_coding	LONG-CHAIN BASE (LCB) KINASE 1 (LCBK1)	LONG-CHAIN BASE (LCB) KINASE 1 (LCBK1);LONG-CHAIN BASE (LCB) KINASE 1 (ATLCBK1)	0.251166	6.87605	8.2538	0.00406669
AT2G35050	AT2G35050.1	kinase superfamily with octicosapeptide/Phox/Bem1p domain-containing protein;(source:Araport11)	protein_coding			0.251226	7.43338	8.1399	0.00433017
AT1G72700	AT1G72700.1	ATPase E1-E2 type family protein / haloacid dehalogenase-like hydrolase family protein;(source:Araport11)	protein_coding	AMINOPHOSPHOLIPID ATPASE 5 (ALA5)	AMINOPHOSPHOLIPID ATPASE 5 (ALA5)	0.25428	7.5264	7.88969	0.00497173
AT5G37740	AT5G37740.2	Calcium-dependent lipid-binding (CaLB domain) family protein;(source:Araport11)	protein_coding			0.254283	7.02187	9.12849	0.00251659
AT1G79830	AT1G79830.4	This gene is predicted to encode a protein that functions as a Golgi apparatus structural component known as a golgin in mammals and yeast. A fluorescently-tagged version of GC5 co-localizes with Golgi markers, and this localization appears to be replicated using the C-terminal (139 aa) portion of the protein. The C-terminal portion of the protein can also specifically interact with two members o…	protein_coding	GOLGIN CANDIDATE 5 (GC5)	GOLGIN CANDIDATE 5 (GC5)	0.256458	7.58334	8.2255	0.00413058
AT3G05990	AT3G05990.1	Leucine-rich repeat (LRR) family protein;(source:Araport11)	protein_coding	(LLR3)	MALECTIN-LIKE DOMAIN (MLD)- AND LEUCINE-RICH REPEAT (LRR)-CONTAINING PROTEIN 3 (MLLR3); (LLR3)	0.25694	6.2079	7.89577	0.00495505
AT1G63690	AT1G63690.2	SIGNAL PEPTIDE PEPTIDASE-LIKE 2;(source:Araport11)	protein_coding	SIGNAL PEPTIDE PEPTIDASE-LIKE 2 (SPPL2)	SIGNAL PEPTIDE PEPTIDASE-LIKE 2 (SPPL2);SIGNAL PEPTIDE PEPTIDASE-LIKE 2 (ATSPPL2)	0.258387	6.55791	8.89378	0.00286144
AT3G58640	AT3G58640.1	Mitogen activated protein kinase kinase kinase-like protein;(source:Araport11)	protein_coding			0.260519	6.15816	9.67458	0.00186834
AT1G31810	AT1G31810.1	Encodes the Type II Arabidopsis formin14. Interacts with microtubules and microfilaments to regulate cell division.	protein_coding	FORMIN HOMOLOGY 14 (AFH14)	FORMIN HOMOLOGY 14 (AFH14); (ATFH14)	0.26253	5.614	7.9768	0.00473806
AT4G32620	AT4G32620.2	Polycomb related protein that is part of a protein complex involved in histone deacetylation and heterochromatin silencing.	protein_coding	(EPCR1)	(EPCR1)	0.262731	5.63142	8.45355	0.00364331
AT3G07100	AT3G07100.1	Encodes SEC24a/ERMO2. Required for endoplasmic reticulum (ER) morphology. Has epistatic interactions with AT1G55350, AT3G59420, and AT3G10525.	protein_coding	ENDOPLASMIC RETICULUM MORPHOLOGY 2 (ERMO2)	ENDOPLASMIC RETICULUM MORPHOLOGY 2 (ERMO2); (AtSEC24A); (SEC24A)	0.263299	7.50757	10.2226	0.00138731
AT5G53400	AT5G53400.1	Encodes BOBBER1 (BOB1), a non-canonical small heat shock protein required for both development and thermotolerance. BOB1 is cytoplasmic at basal temperatures but forms heat shock granules containing canonical small heat shock proteins at high temperatures. The mRNA is cell-to-cell mobile.	protein_coding	BOBBER1 (BOB1)	(EAL);BOBBER1 (BOB1)	0.264487	6.14397	7.87552	0.00501084
AT2G44180	AT2G44180.1	Encodes a MAP2 like methionine aminopeptidase. In MAP1A mutant background plants show an increased sensitivity to fumagillin resulting in defects in development. Phenotype is similar to RNAi lines which knock out all MAP2/MAP1 loci.	protein_coding	METHIONINE AMINOPEPTIDASE 2A (MAP2A)	METHIONINE AMINOPEPTIDASE 2A (MAP2A)	0.264556	5.65637	9.21102	0.00240562
AT1G32170	AT1G32170.1	xyloglucan endotransglycosylase-related protein (XTR4) The mRNA is cell-to-cell mobile.	protein_coding	XYLOGLUCAN ENDOTRANSGLUCOSYLASE/HYDROLASE 30 (XTH30)	XYLOGLUCAN ENDOTRANSGLUCOSYLASE/HYDROLASE 30 (XTH30);XYLOGLUCAN ENDOTRANSGLYCOSYLASE 4 (XTR4)	0.265942	6.49607	8.71909	0.00314895
AT5G58950	AT5G58950.1	Protein kinase superfamily protein;(source:Araport11)	protein_coding			0.266333	7.30523	7.76793	0.00531818
AT1G30400	AT1G30400.1	glutathione S-conjugate transporting ATPase (AtMRP1) mRNA. An ABCC-type arsenite-phytochelatin transporter. The expression of this gene is upregulated by herbicide safeners such as benoxacor and fenclorim.	protein_coding	ATP-BINDING CASSETTE C1 (ABCC1)	ARABIDOPSIS THALIANA MULTIDRUG RESISTANCE-ASSOCIATED PROTEIN 1 (ATMRP1); (EST1);MULTIDRUG RESISTANCE-ASSOCIATED PROTEIN 1 (MRP1);ARABIDOPSIS THALIANA ATP-BINDING CASSETTE C1 (ATABCC1);ATP-BINDING CASSETTE C1 (ABCC1)	0.267868	8.96192	7.97335	0.00474709
AT4G38640	AT4G38640.1	Plasma-membrane choline transporter family protein;(source:Araport11)	protein_coding			0.268174	5.77555	8.92582	0.00281167
AT5G23670	AT5G23670.1	Encodes the LCB2 subunit of serine palmitoyltransferase, an enzyme involved in sphingosine biosynthesis. The protein is localized to the endoplasmic reticulum.	protein_coding	LONG CHAIN BASE2 (LCB2)	LONG CHAIN BASE2 (LCB2)	0.268402	6.2192	9.023	0.00266604
AT2G43970	AT2G43970.1	RNA-binding protein;(source:Araport11)	protein_coding	LA RELATED PROTEIN 6B (LARP6B)	(ATLARP6B);LA RELATED PROTEIN 6B (LARP6B)	0.268845	8.98368	7.94045	0.00483419
AT4G29840	AT4G29840.1	threonine synthase	protein_coding	METHIONINE OVER-ACCUMULATOR 2 (MTO2)	THREONINE SYNTHASE (TS);METHIONINE OVER-ACCUMULATOR 2 (MTO2)	0.26982	6.61441	8.64642	0.00327704
AT2G27980	AT2G27980.1	Acyl-CoA N-acyltransferase with RING/FYVE/PHD-type zinc finger domain-containing protein;(source:Araport11)	protein_coding			0.271792	5.22506	7.93225	0.00485614
AT4G34100	AT4G34100.1	Encodes a putative E3 ubiquitin ligase that is involved in cuticular wax biosynthesis and regulates 3-hydroxy-3-methylglutaryl-CoA reductase (HMGR) activity. HMGR catalyzes the major rate-limiting step of the mevalonic acid (MVA) pathway from which sterols and other isoprenoids are synthesized. Lines carrying a recessive mutation in this locus have reduced chain-length distribution, weakly glauco…	protein_coding	ECERIFERUM 9 (CER9)	SUPPRESSOR OF DRY2 DEFECTS 1 (SUD1);ECERIFERUM 9 (CER9)	0.27351	7.28637	10.2443	0.00137111
AT5G64330	AT5G64330.1	Involved in blue light response signaling pathway; interacts with the blue light photoreceptor NPH1. Null mutations abolish phototrophic responses of etiolated seedlings to low fluence blue light. Protein contains multiple protein-protein interaction domains.	protein_coding	NON-PHOTOTROPIC HYPOCOTYL 3 (NPH3)	NON-PHOTOTROPIC HYPOCOTYL 3 (NPH3); (JK218);ROOT PHOTOTROPISM 3 (RPT3)	0.273593	5.17853	8.67321	0.00322922
AT5G11850	AT5G11850.1	MAP3 kinase involved phosphorylation of a critical Ser171 for OST1/SnRK2.6 activation.	protein_coding	MAPKKK DELTA-1 (MKD1)	(M3Kdelta1);MAPKKK DELTA-1 (MKD1)	0.273946	5.94698	9.378	0.00219604
AT3G02750	AT3G02750.3	Protein phosphatase 2C family protein;(source:Araport11)	protein_coding			0.274529	6.39424	8.53618	0.00348155
AT3G12560	AT3G12560.1	Encodes a telomeric DNA-binding protein.	protein_coding	TRF-LIKE 9 (TRFL9)	TRF-LIKE 9 (TRFL9);TELOMERIC DNA-BINDING PROTEIN 2 (ATTBP2)	0.274774	5.31333	7.84082	0.00510795
AT1G07380	AT1G07380.1	Encodes a neutral ceramidase that is involved in sphingolipid homeostasis and responses to oxidative stress.	protein_coding	NEUTRAL CERAMIDASE 1 (ATNCER1)	NEUTRAL CERAMIDASE 1 (ATNCER1)	0.277051	5.09668	7.83979	0.00511086
AT5G07290	AT5G07290.1	AML4 A member of mei2-like gene family, predominantly plant-based family of genes encoding RNA binding proteins with characteristic presence of a highly conserved RNA binding motif first described in the mei2 gene of the fission yeast S. pombe. In silico analyses reveal nine mei2 -like genes in A. thaliana. They were grouped into four distinct clades, based on overall sequence similarity and subf…	protein_coding	MEI2-LIKE 4 (ML4)	MEI2-LIKE 4 (ML4);MEI2-LIKE 4 (AML4)	0.277377	5.51069	7.73155	0.00542642
AT3G20410	AT3G20410.1	calmodulin-domain protein kinase CDPK isoform 9 (CPK9)	protein_coding	CALMODULIN-DOMAIN PROTEIN KINASE 9 (CPK9)	CALMODULIN-DOMAIN PROTEIN KINASE 9 (CPK9)	0.27775	6.6459	7.97595	0.0047403
AT2G34680	AT2G34680.1	isolated from differential screening of a cDNA library from auxin-treated root culture. sequence does not show homology to any known proteins and is predicted to be extracellular.	protein_coding	AUXIN-INDUCED IN ROOT CULTURES 9 (AIR9)	AUXIN-INDUCED IN ROOT CULTURES 9 (AIR9)	0.278499	7.35151	8.64451	0.00328048
AT5G22450	AT5G22450.1	SAGA complex subunit. Regulates gene expression by affecting histone H3 acetylation.	protein_coding	SAGA COMPLEX SUBUNIT 1 (SCS1)	SAGA COMPLEX SUBUNIT 1 (SCS1)	0.279196	6.09509	8.84082	0.00294567
AT1G67500	AT1G67500.2	Encodes the catalytic subunit of DNA polymerase zeta.Mutants are sensitive to UV-B radiation. Gene is involved in damage-tolerance mechanisms through translesion synthesis(TLS).	protein_coding	RECOVERY PROTEIN 3 (REV3)	RECOVERY PROTEIN 3 (REV3)	0.28028	5.09972	8.81111	0.00299401
AT3G21250	AT3G21250.2	member of MRP subfamily	protein_coding	ATP-BINDING CASSETTE C8 (ABCC8)	ATP-BINDING CASSETTE C8 (ABCC8);MULTIDRUG RESISTANCE-ASSOCIATED PROTEIN 6 (MRP6)	0.280368	6.51315	8.39932	0.00375361
AT4G16150	AT4G16150.1	CATMA5 is a transcriptional activator. It acts in the cold response pathway, it can bind to and activate the expression of DREB1 genes.	protein_coding	CALMODULIN-BINDING TRANSCRIPTION ACTIVATOR 2 (CAMTA5)	CALMODULIN-BINDING TRANSCRIPTION ACTIVATOR 2 (CAMTA5)	0.280487	6.66052	7.91913	0.00489148
AT2G32320	AT2G32320.2	Interacts genetically with its homolog ICA1; alters growth and flowering time plasticity in relation to temperature. Mutants display effects on growth, flowering and plant development, and ploidy level depending on ambient temperature (effects specific at >27C).	protein_coding	ICARUS2 (ICA2)	ICARUS2 (ICA2)	0.28054	4.80308	8.36779	0.00381929
AT3G60250	AT3G60250.1	Regulatory (beta) subunit of the protein kinase CK2. Involved in regulation of the circadian clock in Arabidopsis	protein_coding	CASEIN KINASE II BETA CHAIN 3 (CKB3)	CASEIN KINASE II BETA CHAIN 3 (CKB3)	0.282789	6.14324	8.55327	0.00344901
AT5G15020	AT5G15020.1	Encodes a homolog of the transcriptional repressor SIN3 (AT1G24190).	protein_coding	SIN3-LIKE 2 (SNL2)	SIN3-LIKE 2 (SNL2)	0.282993	6.38891	8.49483	0.00356158
AT5G15730	AT5G15730.2	Protein kinase superfamily protein;(source:Araport11)	protein_coding	CALCIUM/CALMODULIN-REGULATED RECEPTOR-LIKE KINASE 2 (CRLK2)	(AtCRLK2);CALCIUM/CALMODULIN-REGULATED RECEPTOR-LIKE KINASE 2 (CRLK2)	0.283441	4.84958	8.18784	0.00421721
AT5G02770	AT5G02770.1	Encodes a conserved eukaryotic protein with homology to the human RNA binding protein CIP29 that localizes to the nucleus. Mutants accumulate more poly(A) mRNAs in the nucleus, likely resulting from reduced mRNA export activity.	protein_coding	MODIFIER OF SNC1, 11 (MOS11)	MODIFIER OF SNC1, 11 (MOS11)	0.284186	7.34299	8.92609	0.00281125
AT1G29400	AT1G29400.1	A member of mei2-like gene family, predominantly plant-based family of genes encoding RNA binding proteins with characteristic presence of a highly conserved RNA binding motif first described in the mei2 gene of the fission yeast S. pombe. In silico analyses reveal nine mei2 -like genes in A. thaliana. They were grouped into four distinct clades, based on overall sequence similarity and subfamily…	protein_coding	MEI2-LIKE PROTEIN 5 (ML5)	MEI2-LIKE PROTEIN 5 (ML5);MEI2-LIKE PROTEIN 5 (AML5)	0.284992	7.27873	9.59845	0.00194741
AT5G04240	AT5G04240.1	Early Flowering 6 (ELF6) encodes a Jumonji N/C and zinc finger domain-containing protein that acts as a repressor in the photoperiod pathway. ELF6 interacts with BES1 in a Y2H assay, in vitro, and in Arabidosis protoplasts (based on BiFC). ELF6 may play a role in brassinosteroid signaling by affecting histone methylation in the promoters of BR-responsive genes.	protein_coding	EARLY FLOWERING 6 (ELF6)	EARLY FLOWERING 6 (ELF6)	0.285124	5.54661	7.78713	0.00526198
AT1G09570	AT1G09570.1	Light-labile cytoplasmic red/far-red light photoreceptor involved in the regulation of photomorphogenesis. It exists in two inter-convertible forms: Pr and Pfr (active) and functions as a dimer.The N terminus carries a single tetrapyrrole chromophore, and the C terminus is involved in dimerization. It is the sole photoreceptor mediating the FR high irradiance response (HIR). Major regulator in re…	protein_coding	PHYTOCHROME A (PHYA)	PHYTOCHROME A (PHYA);ELONGATED HYPOCOTYL 8 (HY8);FAR RED ELONGATED 1 (FRE1);FAR RED ELONGATED HYPOCOTYL 2 (FHY2)	0.285699	7.61455	10.7103	0.0010654
AT5G64220	AT5G64220.1	CAMTA2 proteins bind to the AtALMT1 promoter at in vitro. The gene itself is Al inducible, and AtALMT1 expression is partially repressed in camta2 mutant. The mRNA is cell-to-cell mobile.	protein_coding	CALMODULIN-BINDING TRANSCRIPTION ACTIVATOR 2 (CAMTA2)	CALMODULIN-BINDING TRANSCRIPTION ACTIVATOR 2 (CAMTA2)	0.286358	5.77367	10.0137	0.00155382
AT2G22670	AT2G22670.4	Encodes a transcriptional repressor of the auxin response that is auxin inducible and is involved in lateral root formation. The mRNA is cell-to-cell mobile.	protein_coding	INDOLEACETIC ACID-INDUCED PROTEIN 8 (IAA8)	INDOLEACETIC ACID-INDUCED PROTEIN 8 (IAA8)	0.288212	7.14069	9.96586	0.0015947
AT1G45150	AT1G45150.1	alpha-1,6-mannosyl-glycoprotein 2-beta-N-acetylglucosaminyltransferase;(source:Araport11)	protein_coding			0.289032	4.77041	8.86674	0.00290413
AT3G17420	AT3G17420.1	Serine/threonine protein kinase-like protein expressed in etiolated cotyledons and found in glyoxysomes.	protein_coding	GLYOXYSOMAL PROTEIN KINASE 1 (GPK1)	GLYOXYSOMAL PROTEIN KINASE 1 (GPK1)	0.289368	5.84319	9.86081	0.00168836
AT3G18860	AT3G18860.1	transducin family protein / WD-40 repeat family protein;(source:Araport11)	protein_coding			0.290632	6.51898	11.3551	0.000752403
AT1G79350	AT1G79350.1	Encodes the Arabidopsis thaliana orthologue of metazoan Strawberry notch, a highly conserved co-activator of the developmental regulator Notch. It mediates stress-induced chromatin memory by modulating nucleosome occupancy by interacting with chromatin remodeling proteins of the ISWI and SWI/SNF classes.	protein_coding	EMBRYO DEFECTIVE 1135 (EMB1135)	EMBRYO DEFECTIVE 1135 (EMB1135);FORGETTER 1 (FGT1)	0.290758	6.08258	10.0451	0.00152753
AT1G62200	AT1G62200.1	Major facilitator superfamily protein;(source:Araport11)	protein_coding	NRT1/ PTR FAMILY 8.5 (NPF8.5)	PEPTIDE TRANSPORTER 6 (PTR6); (ATNPF8.5);NRT1/ PTR FAMILY 8.5 (NPF8.5); (AtPTR6)	0.291221	4.982	7.81092	0.00519314
AT3G06400	AT3G06400.3	Encodes a SWI2/SNF2 chromatin remodeling protein belonging to the ISWI family. Involved in nuclear proliferation during megagametogenesis and cell expansion in the sporophyte. Constitutively expressed. RNAi induced loss of function in megagametogenesis results in female sterility.35S:RNAi plants have reduced stature. Double mutation in CHR17 and CHR11 results in the loss of the evenly spaced nucl…	protein_coding	CHROMATIN-REMODELING PROTEIN 11 (CHR11)	CHROMATIN-REMODELING PROTEIN 11 (CHR11)	0.291414	7.17717	9.08338	0.00257942
AT5G64070	AT5G64070.1	Encodes a phosphatidylinositol 4-OH kinase, PI-4Kbeta1. Arabidopsis contains 12 PI-4Ks in three separate families: PI-4Kalphs, PI-4kbeta, and PI-4Kgamma. PI-4Kbeta1 is 83% identical to PI-4kbeta2 encoded by At5g09350. Interacts with the RabA4b GTPase. Important for polarized root hair growth as the loss of this gene and its close relative PI-4kbeta2, leads to the formation of abnormal root hairs.	protein_coding	PHOSPHATIDYLINOSITOL 4-OH KINASE BETA1 (PI-4KBETA1)	PHOSPHATIDYLINOSITOL 4-OH KINASE BETA1 (PI4KBETA1);PHOSPHATIDYLINOSITOL 4-OH KINASE BETA1 (PI-4KBETA1)	0.291688	6.93653	12.6997	0.000365721
AT5G61140	AT5G61140.2	Encodes a predicted protein with 30% identity with MER3/RCK. Similar to yast Brr2p DEAD/DExH box ATP-dependent RNA helicase.	protein_coding	(BRR2C)	(BRR2C)	0.292186	6.3473	7.89989	0.00494379
AT5G44180	AT5G44180.1	Interacts with CHR11, CHR17, and ARID5, several known subunits of ISWI. JA biosynthesisis is positively regulated by this chromatin remodeling complex, thereby promoting stamen filament elongation.	protein_coding	RINGLET 2 (RLT2)	RINGLET 2 (RLT2)	0.293085	6.38704	9.02766	0.00265925
AT5G53850	AT5G53850.2	Encodes a trifunctional dehydratase / enolase / phosphatase involved in the methionine salvage.	protein_coding	DEHYDRATASE-ENOLASE-PHOSPHATASE-COMPLEX 1 (DEP1)	DEHYDRATASE-ENOLASE-PHOSPHATASE-COMPLEX 1 (DEP1)	0.293478	6.36153	10.7218	0.00105879
AT5G08130	AT5G08130.5	Encodes a basic helix-loop-helix (bHLH) family protein BIM1 (BES1-INTERACTING MYC-LIKE 1), involved in brassinosteroid signaling. It synergistically interacts with BES1 to bind to E box sequences (CANNTG). Positively modulates the shade avoidance syndrome in Arabidopsis seedlings.	protein_coding	BES1-INTERACTING MYC-LIKE1 (BIM1)	BES1-INTERACTING MYC-LIKE1 (BIM1)	0.294754	6.5442	9.21675	0.00239811
AT1G21160	AT1G21160.1	eukaryotic translation initiation factor 2 (eIF-2) family protein;(source:Araport11)	protein_coding			0.296052	5.15413	9.13511	0.00250751
AT3G57410	AT3G57410.1	Encodes a protein with high homology to animal villin. VLN3 is a Ca2+-regulated villin involved in actin filament bundling.	protein_coding	VILLIN 3 (VLN3)	(ATVLN3);VILLIN 3 (VLN3)	0.296058	7.45988	8.62635	0.00331334
AT2G03150	AT2G03150.1	Encodes a nuclear-localized calcium-binding protein RSA1 (SHORT ROOT IN SALT MEDIUM 1), which is required for salt tolerance.	protein_coding	SHORT ROOT IN SALT MEDIUM 1 (RSA1)	SHORT ROOT IN SALT MEDIUM 1 (RSA1);EMBRYO DEFECTIVE 1579 (emb1579)	0.29654	6.18494	8.08252	0.00446943
AT1G20780	AT1G20780.1	Encodes a protein containing a U-box and an ARM domain. Homozygous mutant seedlings have a seedling lethal phenotype with widespread cell death lesions throughout the cotyledons and roots.	protein_coding	SENESCENCE-ASSOCIATED E3 UBIQUITIN LIGASE 1 (SAUL1)	ARABIDOPSIS THALIANA PLANT U-BOX 44 (ATPUB44);PLANT U-BOX 44 (PUB44);SENESCENCE-ASSOCIATED E3 UBIQUITIN LIGASE 1 (SAUL1)	0.296853	5.05081	9.24444	0.00236211
AT3G05970	AT3G05970.1	encode peroxisomal long-chain acyl-CoA synthetase (LACS) isozymes	protein_coding	LONG-CHAIN ACYL-COA SYNTHETASE 6 (LACS6)	(ATLACS6);LONG-CHAIN ACYL-COA SYNTHETASE 6 (LACS6)	0.297535	6.66897	10.8307	0.000998324
AT5G35370	AT5G35370.1	S-locus lectin protein kinase family protein;(source:Araport11)	protein_coding			0.297848	5.71531	9.31197	0.00227662
AT1G03290	AT1G03290.1	ELKS/Rab6-interacting/CAST family protein;(source:Araport11)	protein_coding			0.297874	5.61048	9.26669	0.00233359
AT5G42870	AT5G42870.1	The PAH2 gene encodes a phosphatidate phosphohydrolase. Mutant analysis revealed its involvement in galactolipid synthesis pathway, and the membrane lipid remodeling. The pah1pah2 double-mutant showed enhanced Al-susceptibility under low-P conditions, but there was no significant differences in Al tolerance between pah1pah2 and wild type when they were grown in a solution containing 35 &#956;M Pi.	protein_coding	PHOSPHATIDIC ACID PHOSPHOHYDROLASE 2 (PAH2)	PHOSPHATIDIC ACID PHOSPHOHYDROLASE 2 (PAH2);PHOSPHATIDIC ACID PHOSPHOHYDROLASE 2 (ATPAH2)	0.299607	6.41478	9.36483	0.00221188
AT1G67580	AT1G67580.1	Protein kinase superfamily protein;(source:Araport11)	protein_coding	CYCLIN-DEPENDENT KINASE G2 (CDKG2)	CYCLIN-DEPENDENT KINASE G2 (CDKG2)	0.299961	6.04714	10.1329	0.00145643
AT5G49880	AT5G49880.1	Encodes a spindle assembly checkpoint protein MAD1. The mRNA is cell-to-cell mobile.	protein_coding	MITOTIC ARREST DEFICIENT 1 (MAD1)	MITOTIC ARREST DEFICIENT 1 (MAD1);NITRIC OXIDE-INDUCED EARLY COTYLEDON SENESCENCE 1 (NES1); (ATMAD1)	0.300405	5.38266	11.4987	0.000696449
AT5G25520	AT5G25520.2	SPOC domain / Transcription elongation factor S-II protein;(source:Araport11)	protein_coding			0.301182	5.68818	10.2606	0.00135899
AT3G49490	AT3G49490.1	hypothetical protein;(source:Araport11)	protein_coding			0.301493	6.86007	8.49767	0.00355602
AT5G66910	AT5G66910.1	RPW8 -CNL gene is required for signal transduction of TNLs; functionally redundant to NRG1.1.	protein_coding	N REQUIREMENT GENE 1.2 (NRG1.2)	N REQUIREMENT GENE 1.2 (NRG1.2)	0.30189	4.73648	9.26073	0.0023412
AT2G47070	AT2G47070.1	member of SPL gene family, encodes DNA binding proteins and putative transcription factors. All have the SBP-box, which encodes the SBP-domain, required for and sufficient for interaction with DNA.	protein_coding	SQUAMOSA PROMOTER BINDING PROTEIN-LIKE 1 (SPL1)	SQUAMOSA PROMOTER BINDING PROTEIN-LIKE 1 (SPL1)	0.302097	6.66083	10.8044	0.00101261
AT1G17450	AT1G17450.2	B-block binding subunit of TFIIIC;(source:Araport11)	protein_coding			0.302492	4.97568	8.08267	0.00446906
AT4G12570	AT4G12570.1	Knock-out mutants showed accelerated senescence of leaves. The mRNA is cell-to-cell mobile.	protein_coding	UBIQUITIN PROTEIN LIGASE 5 (UPL5)	UBIQUITIN PROTEIN LIGASE 5 (UPL5)	0.30288	5.46607	7.94151	0.00483136
AT1G08460	AT1G08460.1	histone deacetylase 8;(source:Araport11)	protein_coding	HISTONE DEACETYLASE 8 (HDA08)	HISTONE DEACETYLASE 8 (HDA08); (ATHDA8);HISTONE DEACETYLASE 8 (HDA8)	0.303714	5.1648	8.94325	0.00278497
AT5G64270	AT5G64270.1	splicing factor;(source:Araport11)	protein_coding			0.304676	7.51891	11.4371	0.000719909
AT3G18370	AT3G18370.1	C2 domain-containing protein;(source:Araport11)	protein_coding	(ATSYTF)	(SYTF); (NTMC2T3); (NTMC2TYPE3); (ATSYTF)	0.304818	5.75293	7.84384	0.00509941
AT2G46030	AT2G46030.1	Ubiquitin conjugating enzyme E2	protein_coding	UBIQUITIN-CONJUGATING ENZYME 6 (UBC6)	UBIQUITIN-CONJUGATING ENZYME 6 (UBC6)	0.305405	5.22275	8.35536	0.00384552
AT1G15750	AT1G15750.1	Encodes a protein with several WD40 repeats at the C-terminus and predicted protein-protein interaction domains at the N-terminus. Together with the TOPLESS-RELATED PROTEINS (TPRs), it is thought to be involved in transcriptional repression of root-promoting genes in the top half of the embryo during the transition stage of embryogenesis. It can also interact with IAA12 through the EAR domain of …	protein_coding	TOPLESS (TPL)	TOPLESS (TPL);WUS-INTERACTING PROTEIN 1 (WSIP1)	0.306431	7.874	10.7791	0.00102652
AT3G08530	AT3G08530.1	CHC2 heavy chain subunit of clathrin. Involved in vesicle mediated trafficking. Mutants show reduced rates of endocytosis and defects clathrin mediated exocytosis Mutants have increased drought tolerance due to defects in stomatal movement.	protein_coding	CLATHRIN HEAVY CHAIN 2 (CHC2)	(ATCHC2);CLATHRIN HEAVY CHAIN 2 (CHC2)	0.306919	8.7269	9.60724	0.00193812
AT5G45060	AT5G45060.1	Disease resistance protein (TIR-NBS-LRR class) family;(source:Araport11)	protein_coding			0.30819	4.50865	7.81386	0.0051847
AT1G16930	AT1G16930.1	F-box/RNI-like/FBD-like domains-containing protein;(source:Araport11)	protein_coding			0.308741	4.1443	7.80253	0.00521732
AT3G22170	AT3G22170.1	A component of the PHYA signaling network, mediates the FR-HIR response to far-red light in concert with FAR1. Expression is induced by age; involved in negative regulation of leaf senescence.	protein_coding	FAR-RED ELONGATED HYPOCOTYLS 3 (fhy3)	CHLOROPLAST DIVISION MUTANT 45 (CPD45);FAR-RED ELONGATED HYPOCOTYLS 3 (fhy3)	0.309218	6.23026	9.01545	0.00267708
AT5G46470	AT5G46470.1	Encodes RPS6 (RESISTANT TO P. SYRINGAE 6), a member of the TIR-NBS-LRR class resistance protein. The mRNA is cell-to-cell mobile.	protein_coding	RESISTANT TO P. SYRINGAE 6 (RPS6)	RESISTANT TO P. SYRINGAE 6 (RPS6)	0.309438	5.30397	8.02003	0.00462628
AT3G28030	AT3G28030.1	Required for repair of pyrimidine-pyrimidinone (6-4) dimers. The mRNA is cell-to-cell mobile.	protein_coding	ULTRAVIOLET HYPERSENSITIVE 3 (UVH3)	UV REPAIR DEFECTIVE 1 (UVR1);ULTRAVIOLET HYPERSENSITIVE 3 (UVH3)	0.310704	4.64903	7.81666	0.00517667
AT2G33540	AT2G33540.1	C-terminal domain phosphatase-like 3;(source:Araport11)	protein_coding	C-TERMINAL DOMAIN PHOSPHATASE-LIKE 3 (CPL3)	C-TERMINAL DOMAIN PHOSPHATASE-LIKE 3 (CPL3); (ATCPL3)	0.311091	5.23045	8.62327	0.00331896
AT3G48060	AT3G48060.1	BAH and TFIIS domain-containing protein;(source:Araport11)	protein_coding			0.311404	5.50017	9.58144	0.00196554
AT3G48050	AT3G48050.1	Encodes a large protein with N-terminal bromo-adjacent homology (BAH) and transcription elongation factor S-II (TFS2N) domains and two C-terminal GW (glycine and tryptophan) repeats. It is nuclear and colocalizes with the processing-body component DCP1 in the cytoplasm. SOU is a component of the miRNA pathway and is involved in translational repression.	protein_coding	'SHUTTLE' IN CHINESE (SUO)	'SHUTTLE' IN CHINESE (SUO)	0.311665	7.00786	10.933	0.000944689
AT3G63500	AT3G63500.2	Encodes a PHD-finger protein that, with TTA2, is redundantly required for MP-dependent embryonic root meristem initiation.	protein_coding	TITANIA 2 (TTA2)	(OBE4);TITANIA 2 (TTA2)	0.312495	6.79394	8.24913	0.00407715
AT4G29380	AT4G29380.1	The gene encodes phosphatidylinositol 3- kinase involved in the development and germination of pollen through the biosynthesis of phosphatidylinositol 3-phosphate (PI3P). The mRNA is cell-to-cell mobile.	protein_coding	VACUOLAR PROTEIN SORTING 15 (VPS15)	VACUOLAR PROTEIN SORTING 15 (VPS15);ARABIDOPSIS THALIANA VACUOLAR PROTEIN SORTING 15 (AtVPS15);MODIFIED TRANSPORT TO THE VACUOLE 11 (MTV11)	0.313974	6.0702	8.34641	0.0038645
AT5G20520	AT5G20520.1	Encodes a de-S-acylation enzyme which specifically reduces protein S-acylation levels of five immunity-related proteins. WAV2 negatively regulates root bending when roots alter their growth direction. It's not involved in sensing environmental stimuli (e.g. gravity, light, water, touch).	protein_coding	WAVY GROWTH 2 (WAV2)	WAVY GROWTH 2 (WAV2);ABHD17 (ALPHA/BETA HYDROLASE DOMAIN-CONTAINING PROTEIN 17)-LIKE ACYL PROTEIN THIOESTERASE 11 (ABAPT11)	0.314159	6.44005	9.69817	0.00184451
AT4G02480	AT4G02480.1	AAA-type ATPase family protein;(source:Araport11)	protein_coding			0.314165	8.36998	11.5416	0.000680551
AT1G64190	AT1G64190.1	6-phosphogluconate dehydrogenase family protein;(source:Araport11)	protein_coding	6-PHOSPHOGLUCONATE DEHYDROGENASE 1 (PGD1)	6-PHOSPHOGLUCONATE DEHYDROGENASE 1 (PGD1)	0.314666	7.63767	9.51506	0.00203793
AT4G03415	AT4G03415.1	Encodes a myristoylated 2C-type protein phosphatase that interacts with AGB1 and is localized to the plasma membrane.	protein_coding	2C-TYPE PROTEIN PHOSPHATASE 52 (PP2C52)	2C-TYPE PROTEIN PHOSPHATASE 52 (PP2C52)	0.315126	5.63754	7.78415	0.00527066
AT1G17580	AT1G17580.1	Encodes a member of the type XI myosin protein family involved in organelle trafficking and overall plant development.	protein_coding	MYOSIN 1 (MYA1)	ARABIDOPSIS MYOSIN 1 (ATMYA1);MYOSIN XI 1 (XI-1);MYOSIN 1 (MYA1)	0.315394	5.63242	9.99141	0.00157272
AT5G19520	AT5G19520.1	mechanosensitive channel of small conductance-like 9;(source:Araport11)	protein_coding	MECHANOSENSITIVE CHANNEL OF SMALL CONDUCTANCE-LIKE 9 (MSL9)	MECHANOSENSITIVE CHANNEL OF SMALL CONDUCTANCE-LIKE 9 (MSL9); (ATMSL9)	0.315518	5.93702	9.01738	0.00267425
AT5G16780	AT5G16780.1	Encodes a protein belonging to SART-1 family. The gene is expressed in the basal region of the developing embryo during heart stage. Phenotypic analyses of dot2 mutants suggest that this protein plays a role in root, shoot, and flower development. dot2 mutants are dwarved plants that display an aberrant spurred leaf venation pattern and fail to flower. In the roots DOT2 appears to be require for …	protein_coding	DEFECTIVELY ORGANIZED TRIBUTARIES 2 (DOT2)	MERISTEM-DEFECTIVE (MDF);DEFECTIVELY ORGANIZED TRIBUTARIES 2 (DOT2)	0.315519	6.39409	8.04658	0.00455896
AT1G16710	AT1G16710.1	Encodes an enzyme with histone acetyltransferase activity that can use both H3 and H4 histones as substrates. No single prior lysine acetylation is sufficient to block HAC12 acetylation of the H3 or H4 peptides, suggesting that HAC12 can acetylate any of several lysines present in the peptides.	protein_coding	HISTONE ACETYLTRANSFERASE OF THE CBP FAMILY 12 (HAC12)	HISTONE ACETYLTRANSFERASE OF THE CBP FAMILY 12 (HAC12)	0.315739	5.92479	11.0227	0.00090001
AT1G60200	AT1G60200.1	RBM25 is an alternative splicing factor involved in mediation of abiotic stress response and ABA response. Its expression is modulated by a variety of stressors and it in turn appears to affect the ratio of splice variants of stress responsive genes such as HAB1.2/HAB1.1.	protein_coding	RNA-BINDING PROTEIN 25 (RBM25)	RNA-BINDING PROTEIN 25 (RBM25)	0.316174	7.07019	9.23645	0.00237244
AT2G45220	AT2G45220.1	Pectin methylesterase involved in pectin remodelling. Regulated by its PRO region that triggers PME activity in the resistance to Botrytis cinerea.	protein_coding	PECTIN METHYLESTERASE 17 (PME17)	(ATPME17);PECTIN METHYLESTERASE 17 (PME17)	0.31659	7.18447	9.76964	0.00177417
AT4G15180	AT4G15180.1	Encodes SET domain containing protein that acts redundantly with ATX4/5 to regulate histone H3-K4 methylation.	protein_coding	SET DOMAIN PROTEIN 2 (SDG2)	(ATXR3);SET DOMAIN PROTEIN 2 (SDG2)	0.316731	6.49236	8.51181	0.00352848
AT3G14240	AT3G14240.1	Subtilase family protein;(source:Araport11)	protein_coding			0.317056	6.22533	7.9013	0.00493994
AT4G34180	AT4G34180.1	Encodes a cyclase-family protein that is a negative regulator of cell death that regulates pathogen-induced symptom development.	protein_coding	CYCLASE1 (CYCLASE1)	CYCLASE1 (CYCLASE1)	0.317456	7.28988	8.25618	0.00406136
AT3G01320	AT3G01320.1	Encodes SIN3-like 1, a homolog of the transcriptional repressor SIN3 (AT1G24190).	protein_coding	SIN3-LIKE 1 (SNL1)	SIN3-LIKE 1 (SNL1)	0.317731	5.79267	8.20995	0.00416612
AT1G27320	AT1G27320.1	Encodes a histidine kinases, a cytokinin receptor that controls cytokinin-mediated leaf longevity through a specific phosphorylation of the response regulator, ARR2. The mRNA is cell-to-cell mobile.	protein_coding	HISTIDINE KINASE 3 (HK3)	HISTIDINE KINASE 3 (AHK3);HISTIDINE KINASE 3 (HK3)	0.317767	7.0232	8.98279	0.00272533
AT5G42220	AT5G42220.1	Ubiquitin-like superfamily protein;(source:Araport11)	protein_coding			0.318968	6.5583	7.94704	0.00481661
AT4G33630	AT4G33630.1	Encodes one of the two plastid proteins EXECUTER (EX1, AT4G33630) and EX2 (AT1G27510). Mediates singlet oxygen induced programmed cell death.	protein_coding	EXECUTER1 (EX1)	EXECUTER1 (EX1)	0.318978	5.78194	8.72956	0.00313093
AT2G22540	AT2G22540.1	Encodes a nuclear protein that acts as a floral repressor and that functions within the thermosensory pathway. SVP represses FT expression via direct binding to the vCArG III motif in the FT promoter.	protein_coding	SHORT VEGETATIVE PHASE (SVP)	SHORT VEGETATIVE PHASE (SVP);FLOWERING ARABIDOPSIS QTL1 (FAQ1);AGAMOUS-LIKE 22 (AGL22)	0.320037	5.23442	8.78089	0.00304403
AT4G15475	AT4G15475.1	Contributes to UV tolerance through nucleotide excision repair.	protein_coding	RADIATION SENSITIVE 7B (RAD7B)	RADIATION SENSITIVE 7B (RAD7B)	0.32038	4.96027	9.12075	0.00252726
AT3G18170	AT3G18170.1	Glycosyltransferase family 61 protein;(source:Araport11)	protein_coding			0.320819	5.55851	8.64102	0.00328677
AT1G63770	AT1G63770.5	Peptidase M1 family protein;(source:Araport11)	protein_coding			0.321744	7.86341	10.1515	0.00144185
AT3G26290	AT3G26290.1	putative cytochrome P450	protein_coding	CYTOCHROME P450, FAMILY 71, SUBFAMILY B, POLYPEPTIDE 26 (CYP71B26)	CYTOCHROME P450, FAMILY 71, SUBFAMILY B, POLYPEPTIDE 26 (CYP71B26)	0.321944	5.87713	11.3793	0.000742673
AT4G32910	AT4G32910.1	SBB1 is a putative nucleoporin that is localized to the nuclear envelope. SBB1 was identified in a screen for supressors of BAK1, BKK1 mediated cell death.	protein_coding	SUPPRESSOR OF BAK1 BKK1 (SBB1)	NUCLEOPORIN 85 (NUP85);SUPPRESSOR OF BAK1 BKK1 (SBB1)	0.321979	5.7773	9.21188	0.00240449
AT5G03240	AT5G03240.1	encodes ubiquitin that is attached to proteins destined for degradation. UBQ3 is most homologous with UBQ4, and is expressed in higher levels in vegetative tissue but lower levels in flowers than UBQ4. UBQ3 encodes different number of ubiquitins in different ecotypes. UBQ3 transcript level is modulated by UV-B and light/dark treatments.	protein_coding	POLYUBIQUITIN 3 (UBQ3)	POLYUBIQUITIN 3 (UBQ3)	0.322012	10.8784	7.95228	0.0048027
AT5G56900	AT5G56900.2	CwfJ-like family protein / zinc finger (CCCH-type) family protein;(source:Araport11)	protein_coding			0.32203	5.46394	10.5315	0.00117355
AT4G24520	AT4G24520.1	Encodes a cyp450 reductase likely to be involved in phenylpropanoid metabolism.	protein_coding	P450 REDUCTASE 1 (ATR1)	ARABIDOPSIS CYTOCHROME REDUCTASE (AR1);ARABIDOPSIS THALIANA CYTOCHROME REDUCTASE 1 (ATCPR1);P450 REDUCTASE 1 (ATR1)	0.322766	8.12778	11.3949	0.000736459
AT1G60940	AT1G60940.1	encodes a member of SNF1-related protein kinases (SnRK2) whose activity is activated by ionic (salt) and non-ionic (mannitol) osmotic stress.	protein_coding	SNF1-RELATED PROTEIN KINASE 2.10 (SNRK2.10)	SUCROSE NONFERMENTING 1-RELATED PROTEIN KINASE 2-10 (SNRK2-10);SNF1-RELATED KINASE 2B (SRK2B);SNF1-RELATED PROTEIN KINASE 2.10 (SNRK2.10)	0.322781	6.25834	9.33391	0.00224952
AT4G13730	AT4G13730.1	Ypt/Rab-GAP domain of gyp1p superfamily protein;(source:Araport11)	protein_coding			0.322895	4.68652	10.5961	0.00113324
AT2G06850	AT2G06850.1	endoxyloglucan transferase (EXGT-A1) gene	protein_coding	XYLOGLUCAN ENDOTRANSGLUCOSYLASE/HYDROLASE 4 (XTH4)	ENDOXYLOGLUCAN TRANSFERASE A1 (EXGT-A1);ENDOXYLOGLUCAN TRANSFERASE (EXT);XYLOGLUCAN ENDOTRANSGLUCOSYLASE/HYDROLASE 4 (XTH4)	0.322898	5.92007	8.76123	0.00307701
AT4G02100	AT4G02100.1	Heat shock protein DnaJ with tetratricopeptide repeat-containing protein;(source:Araport11)	protein_coding			0.322997	5.27054	8.17763	0.00424101
AT5G57035	AT5G57035.1	U-box domain-containing protein kinase family protein;(source:Araport11)	protein_coding			0.323202	4.93392	8.82095	0.00297792
AT2G44900	AT2G44900.1	ARABIDILLO-1 and its homolog, ARABIDILLO -2, are unique among Arabidopsis Arm-repeat proteins in having an F-box motif and fall into a phylogenetically distinct subgroup from other plant Arm-repeat proteins Similar to arm repeat protein in rice and armadillo/beta-catenin repeat family protein / F-box family protein in Dictyostelium. ARABIDILLO-1 promote lateral root development. Mutant plants for…	protein_coding	ARABIDILLO-1 (ARABIDILLO-1)	ARABIDILLO-1 (ARABIDILLO-1);F-BOX PROTEIN 5 (FBX5);F-BOX ARMADILLO PROTEIN 1 (ARABIDILLO1)	0.323287	4.84705	8.27413	0.00402138
AT5G28040	AT5G28040.1	Member of the GeBP/GPL family of leucine zipper transcription factors. VPF4 interacts with the F-box proteins from A.tumefaciens VirF and VBF. Over expression results in decreased tumor formation upon Agrobacterium infection. Mutants show changes in the level of expression of defense response genes.	protein_coding	VIRF INTERACTING PROTEIN 4 (VFP4)	VIRF INTERACTING PROTEIN 4 (VFP4)	0.323534	4.92631	8.62176	0.0033217
AT1G72650	AT1G72650.2	Arabidopsis thaliana myb family transcription factor (At1g72650)	protein_coding	TRF-LIKE 6 (TRFL6)	TRF-LIKE 6 (TRFL6)	0.323536	5.44351	7.888	0.00497638
AT1G04970	AT1G04970.1	Encodes one of the two LBP/BPI related proteins (AT1G04970/LBR-1, AT3G20270/LBR-2) that bind to LPS directly and regulate PR1 expression. Putative BPI/LBP family protein.	protein_coding	(LBR-1)	(LBR-1)	0.323576	5.74132	11.086	0.000869828
AT3G04810	AT3G04810.1	Encodes AtNek2, a member of the NIMA-related serine/threonine kinases (Neks) that have been linked to cell-cycle regulation in fungi and mammals. Plant Neks might be involved in plant development processes.	protein_coding	NIMA-RELATED KINASE 2 (NEK2)	NIMA-RELATED KINASE 2 (NEK2);NIMA-RELATED KINASE 2 (ATNEK2)	0.324408	6.35257	8.63193	0.00330321
AT5G50350	AT5G50350.1	hypothetical protein;(source:Araport11)	protein_coding			0.32518	4.24851	8.38585	0.00378154
AT2G28800	AT2G28800.1	member of Chloroplast membrane protein ALBINO3 family. Similar to pea PPF1 and may play a role in plant senescence.	protein_coding	ALBINO 3 (ALB3)	ALBINO 3 (ALB3); (ABL3)	0.325261	6.84745	8.15756	0.00428821
AT1G03380	AT1G03380.1	yeast autophagy 18 G-like protein;(source:Araport11)	protein_coding	HOMOLOG OF YEAST AUTOPHAGY 18 (ATG18) G (ATG18G)	HOMOLOG OF YEAST AUTOPHAGY 18 (ATG18) G (ATG18G);HOMOLOG OF YEAST AUTOPHAGY 18 (ATG18) G (ATATG18G)	0.325284	6.43228	13.3426	0.000259445
AT4G30910	AT4G30910.1	Cytosol aminopeptidase family protein;(source:Araport11)	protein_coding			0.325309	5.01357	11.5471	0.00067855
AT4G38550	AT4G38550.1	phospholipase-like protein (PEARLI 4) family protein;(source:Araport11)	protein_coding			0.325813	7.26995	9.14603	0.00249259
AT1G06840	AT1G06840.1	Homomultimers interact with cytoplasmic signaling molecule PBL27, resulting in herbivory resistance, in an ethylene-dependent manner.	protein_coding	HDS-ASSOCIATED RLK1 (HAK1)	HDS-ASSOCIATED RLK1 (HAK1)	0.326097	6.10646	10.9161	0.000953346
AT5G47690	AT5G47690.3	One of 5 PO76/PDS5 cohesion cofactor orthologs of Arabidopsis.	protein_coding	(PDS5A)	(PDS5); (ATPDS5A); (PDS5A)	0.326105	7.55049	14.3738	0.000149871
AT5G16880	AT5G16880.1	Encodes a member of the Arabidopsis TOL (TOM1-LIKE) family of ubiquitin binding proteins that acts redundantly in the recognition and further endocytic sorting of a PIN-FORMED (PIN)-type auxin carrier protein at the plasma membrane, modulating dynamic auxin distribution and associated growth responses.	protein_coding	TOM1-LIKE 1 (TOL1)	TOM1-LIKE 1 (TOL1)	0.326355	7.33876	9.69688	0.00184581
AT4G16130	AT4G16130.1	Arabinokinase.	protein_coding	ARABINOSE KINASE (ARA1)	ARABINOSE KINASE (ARA1); (ATISA1); (ISA1)	0.327708	5.43802	9.64873	0.00189483
AT5G27730	AT5G27730.1	heparan-alpha-glucosaminide N-acetyltransferase-like protein (DUF1624);(source:Araport11)	protein_coding			0.328571	4.60107	8.29206	0.00398188
AT1G79000	AT1G79000.2	Homologous to CREB-binding protein, a co-activator of transcription with histone acetyl-transferase activity. No single prior lysine acetylation is sufficient to block HAC1 acetylation of the H3 or H4 peptides, suggesting that HAC1, HAC5, and HAC12 can acetylate any of several lysines present in the peptides. HAM2 acetylates histone H4 lysine 5. A plant line expressing an RNAi construct targeted …	protein_coding	HISTONE ACETYLTRANSFERASE OF THE CBP FAMILY 1 (HAC1)	HISTONE ACETYLTRANSFERASE OF THE CBP FAMILY 1 (HAC1)	0.328656	6.7933	9.40513	0.00216379
AT5G16730	AT5G16730.1	Encodes a microtubule-associated protein. The mRNA is cell-to-cell mobile.	protein_coding			0.329358	6.86062	13.9911	0.000183674
AT5G17330	AT5G17330.1	Encodes one of two isoforms of glutamate decarboxylase. The mRNA is cell-to-cell mobile.	protein_coding	GLUTAMATE DECARBOXYLASE (GAD)	GLUTAMATE DECARBOXYLASE 1 (GAD1); (ATGAD1);GLUTAMATE DECARBOXYLASE (GAD)	0.330005	9.01557	10.0305	0.00153968
AT2G15390	AT2G15390.2	Encodes an alpha-(1,2)-fucosyltransferase.	protein_coding	FUCOSYLTRANSFERASE 4 (FUT4)	FUCOSYLTRANSFERASE 4 (FUT4); (atfut4)	0.331522	4.90747	10.5391	0.00116873
AT4G21710	AT4G21710.1	Encodes the unique second-largest subunit of DNA-dependent RNA polymerase II; the ortholog of budding yeast RPB2 and a homolog of the E. coli RNA polymerase beta subunit.	protein_coding	(NRPB2)	(NRPB2); (RPB2);EMBRYO DEFECTIVE 1989 (EMB1989)	0.331986	6.76868	9.39734	0.002173
AT5G54380	AT5G54380.1	Encodes THESEUS1 (THE1), a receptor kinase regulated by Brassinosteroids and required for cell elongation during vegetative growth.	protein_coding	THESEUS1 (THE1)	THESEUS1 (THE1)	0.333157	5.56814	11.6243	0.000650948
AT1G02960	AT1G02960.2	kinetochore protein;(source:Araport11)	protein_coding			0.333225	4.52896	7.81329	0.00518635
AT4G35230	AT4G35230.1	Encodes BR-signaling kinase 1 (BSK1), one of the three homologous BR-signaling kinases (BSK1, AT4G35230; BSK2, AT5G46570; BSK3, AT4G00710). Mediates signal transduction from receptor kinase BRI1 by functioning as the substrate of BRI1. Plasma membrane localized.	protein_coding	BRASSINOSTEROID-SIGNALING KINASE 1 (BSK1)	BRASSINOSTEROID-SIGNALING KINASE 1 (BSK1)	0.33388	6.12559	14.0573	0.000177324
AT5G17910	AT5G17910.1	cardiomyopathy-associated protein;(source:Araport11)	protein_coding			0.334022	6.11658	10.6849	0.00108013
AT3G13690	AT3G13690.1	kinase with adenine nucleotide alpha hydrolases-like domain-containing protein;(source:Araport11)	protein_coding			0.334163	5.47028	9.97824	0.00158401
AT2G31820	AT2G31820.1	Ankyrin repeat family protein;(source:Araport11)	protein_coding			0.334164	5.76946	9.41467	0.00215256
AT1G18470	AT1G18470.1	Putative C3HC4 zinc-finger ubiquitin E3 ligase that is induced by ABA and plays a positive role in ABA signaling.	protein_coding	PROTEIN WITH THE RING DOMAIN AND TMEMB_185A 3 (PPRT3)	(ATPPRT3);PROTEIN WITH THE RING DOMAIN AND TMEMB_185A 3 (PPRT3)	0.33446	6.77732	10.6021	0.00112958
AT3G12640	AT3G12640.1	RNA binding (RRM/RBD/RNP motifs) family protein;(source:Araport11)	protein_coding			0.334666	5.24618	12.9941	0.00031247
AT3G63010	AT3G63010.1	Encodes a gibberellin (GA) receptor ortholog of the rice GA receptor gene (OsGID1). Has GA-binding activity, showing higher affinity to GA4. Interacts with DELLA proteins in vivo in the presence of GA4. The mRNA is cell-to-cell mobile.	protein_coding	GA INSENSITIVE DWARF1B (GID1B)	GA INSENSITIVE DWARF1B (GID1B); (ATGID1B)	0.334896	5.88675	8.52391	0.0035051
AT2G46900	AT2G46900.1	transcription factor-like protein;(source:Araport11)	protein_coding			0.335043	6.1555	9.54801	0.00200166
AT1G67230	AT1G67230.1	Encodes a nuclear coiled-coil protein related to the carrot peripheral nuclear protein NMCP1 that is involved in the determination of plant nuclear structure. Member of a small gene family in Arabidopsis containing 4 proteins (LNC1-4 or CRWN 1-4) with redundant functions in protection from oxidative damage, control of nuclear morphology and degradation of ABI5.	protein_coding	LITTLE NUCLEI1 (LINC1)	(ATLINC1);(JAPANESE FOR NUCLEUS) 2 (KAKU2);LITTLE NUCLEI1 (LINC1);CROWDED NUCLEI 1 (CRWN1)	0.335566	7.19503	8.46836	0.00361378
AT1G67310	AT1G67310.1	Calmodulin-binding transcription activator protein with CG-1 and Ankyrin domain;(source:Araport11)	protein_coding			0.335926	6.132	11.5568	0.000675019
AT4G30550	AT4G30550.1	Class I glutamine amidotransferase-like superfamily protein;(source:Araport11)	protein_coding	GAMMA-GLUTAMYL PEPTIDASE 3 (GGP3)	GAMMA-GLUTAMYL PEPTIDASE 3 (GGP3)	0.336104	5.31036	11.1291	0.000849842
AT4G08960	AT4G08960.1	phosphotyrosyl phosphatase activator (PTPA) family protein;(source:Araport11)	protein_coding			0.336234	4.70127	8.64677	0.00327642
AT5G23020	AT5G23020.1	methylthioalkymalate synthase-like. Also known as 2-isopropylmalate synthase (IMS2). encodes a methylthioalkylmalate synthase involved in the biosynthesis of aliphatic glucosinolates which accepts all the omega-methylthio-2-oxoalkanoic acids needed to form the known C3 to C8 glucosinolates in Arabidopsis. The mRNA is cell-to-cell mobile.	protein_coding	2-ISOPROPYLMALATE SYNTHASE 2 (IMS2)	(MAM3);METHYLTHIOALKYMALATE SYNTHASE-LIKE (MAM-L);2-ISOPROPYLMALATE SYNTHASE 2 (IMS2)	0.336324	7.35378	9.16442	0.00246766
AT1G49050	AT1G49050.1	Encodes a member of the aspartyl protease family. Interacts with BAGP1 and BAG6 and appears to be required for cleavage of BAG6 as BAG6 is not cleaved in APCB1 mutant backgrounds.	protein_coding	(APCB1)	(APCB1)	0.33691	5.39352	9.17167	0.0024579
AT5G65750	AT5G65750.1	Encodes the E1 subunit of the 2-oxoglutarate dehydrogenase.	protein_coding	(E1-OGDH2)	(E1-OGDH2)	0.337002	6.46723	13.336	0.00026036
AT5G11700	AT5G11700.2	ephrin type-B receptor;(source:Araport11)	protein_coding			0.337012	7.43081	13.2083	0.000278711
AT4G04955	AT4G04955.1	Encodes an allantoinase which is involved in allantoin degradation and assimilation. Gene expression was induced when allantoin was added to the medium. The insertion mutant, ataln m2-1, did not grow well on the MS medium where allantoin, instead of ammonium nitrate, was supplied.	protein_coding	ALLANTOINASE (ALN)	ALLANTOINASE (ALN);ALLANTOINASE (ATALN)	0.337434	5.70248	11.7525	0.000607612
AT5G53350	AT5G53350.1	CLP protease regulatory subunit CLPX mRNA, nuclear gene	protein_coding	CLP PROTEASE REGULATORY SUBUNIT X (CLPX)	CLP PROTEASE REGULATORY SUBUNIT X (CLPX)	0.338091	7.006	14.5473	0.000136683
AT3G47730	AT3G47730.1	member of ATH subfamily	protein_coding	ATP-BINDING CASSETTE A2 (ABCA2)	A. THALIANA ABC2 HOMOLOG 1 (ATATH1);ATP-BINDING CASSETTE A2 (ABCA2);ABC2 HOMOLOG 1 (ATH1)	0.338405	7.41079	10.544	0.00116567
AT4G32940	AT4G32940.1	Encodes a vacuolar processing enzyme belonging to a novel group of cysteine proteinases that is expressed in vegetative organs and is upregulated in association with various types of cell death and under stressed conditions. They are essential in processing seed storage proteins and for mediating the susceptible response of toxin-induced cell death.	protein_coding	GAMMA VACUOLAR PROCESSING ENZYME (GAMMA-VPE)	GAMMA VACUOLAR PROCESSING ENZYME (GAMMA-VPE); (GAMMAVPE); (ATLEG GAMMA);LEGUMAIN GAMMA (LEG GAMMA);ASPARAGINYL ENDOPEPTIDASE 3 (AEP3)	0.338425	8.18655	9.37275	0.00220234
AT4G30790	AT4G30790.1	Encodes autophagy-related 2 (ATG11)	protein_coding	AUTOPHAGY-RELATED 11 (ATG11)	AUTOPHAGY-RELATED 11 (ATG11)	0.338662	5.77463	8.33673	0.00388514
AT3G45830	AT3G45830.1	nuclear factor kappa-B-binding-like protein;(source:Araport11)	protein_coding	NUCLEAR FACTOR KAPPA-B-BINDING-LIKE PROTEIN 1 (NFRKB1)	NUCLEAR FACTOR KAPPA-B-BINDING-LIKE PROTEIN 1 (NFRKB1)	0.339065	5.21801	12.3356	0.000444389
AT5G66180	AT5G66180.1	S-adenosyl-L-methionine-dependent methyltransferases superfamily protein;(source:Araport11)	protein_coding	TRNA METHYLTRANSFERASE 4G (TRM4G)	(ATTRM4G);TRNA METHYLTRANSFERASE 4G (TRM4G)	0.33927	4.66177	8.96036	0.002759
AT1G56140	AT1G56140.1	Leucine-rich repeat transmembrane protein kinase;(source:Araport11)	protein_coding			0.339658	6.59918	10.5207	0.00118046
AT4G39400	AT4G39400.1	Encodes a plasma membrane localized leucine-rich repeat receptor kinase involved in brassinosteroid signal transduction. BRI1 ligand is brassinolide which binds at the extracellular domain. Binding results in phosphorylation of the kinase domain which activates the BRI1 protein leading to BR responses. Residue T-1049 and either S-1044 or T-1045 were essential for kinase function in vitro and norm…	protein_coding	BRASSINOSTEROID INSENSITIVE 1 (BRI1)	BRASSINOSTEROID INSENSITIVE 1 (BRI1);CABBAGE 2 (CBB2); (ATBRI1);BR INSENSITIVE 1 (BIN1);DWARF 2 (DWF2)	0.339781	6.68303	9.19954	0.00242076
AT1G71010	AT1G71010.1	Encodes a protein that is predicted to act as a phosphatidylinositol-3P 5-kinase, but, because it lacks a FYVE domain, it is unlikely to be efficiently targeted to membranes containing the proposed phosphatidylinositol-3P substrate. Therefore, its molecular function remains unknown. The mRNA is cell-to-cell mobile.	protein_coding	FORMS APLOID AND BINUCLEATE CELLS 1C (FAB1C)	FORMS APLOID AND BINUCLEATE CELLS 1C (FAB1C)	0.339792	7.66967	14.1425	0.000169467
AT4G28830	AT4G28830.1	S-adenosyl-L-methionine-dependent methyltransferases superfamily protein;(source:Araport11)	protein_coding			0.34053	4.43991	8.23955	0.00409872
AT2G45510	AT2G45510.1	member of CYP704A	protein_coding	CYTOCHROME P450, FAMILY 704, SUBFAMILY A, POLYPEPTIDE 2 (CYP704A2)	CYTOCHROME P450, FAMILY 704, SUBFAMILY A, POLYPEPTIDE 2 (CYP704A2)	0.340662	5.72594	8.32246	0.00391578
AT5G10860	AT5G10860.1	Encodes a single cystathionine beta-Synthase domain-containing protein. Modulates development by regulating the thioredoxin system.	protein_coding	CBS DOMAIN CONTAINING PROTEIN 3 (CBSX3)	CBS DOMAIN CONTAINING PROTEIN 3 (CBSX3)	0.3415	8.50032	11.3202	0.000766665
AT3G62010	AT3G62010.1	metal ion-binding protein;(source:Araport11)	protein_coding			0.341585	6.53603	9.68871	0.00185404
AT2G23140	AT2G23140.1	PUB4 encodes a functional ubiquitin-protein ligase. The gene is expressed in most plant tissues and the protein localizes to the nucleus. PUB4 has been recovered as a second site suppressor from several different genetic screens and from these, it has been inferred to have roles in regulating root development, pollen tapetum development and ROS induced chloroplast degredation.	protein_coding	PLANT U-BOX 4 (PUB4)	PLANT U-BOX 4 (PUB4); (ATPUB4)	0.342023	5.09895	12.8099	0.000344788
AT4G03430	AT4G03430.1	Encodes a nuclear protein similar to the human U5 small ribonucleoprotein-associated 102-kD protein and to the yeast pre-mRNA splicing factors Prp1p and Prp6p. STA1 expression is upregulated by cold stress, and the sta1-1 mutant is defective in the splicing of the cold-induced COR15A gene. Luciferase imaging was used to isolate a recessive mutant, sta1-1, with enhanced stability of the normally u…	protein_coding	STABILIZED 1 (STA1)	STARIK 1 (STA1);EMBRYO DEFECTIVE 2770 (EMB2770);STABILIZED 1 (STA1)	0.342197	6.55058	11.4396	0.000718934
AT3G07940	AT3G07940.1	Calcium-dependent ARF-type GTPase activating protein family;(source:Araport11)	protein_coding			0.343231	4.95794	9.27132	0.0023277
AT5G46180	AT5G46180.1	Encodes an ornithine delta-aminotransferase that is transcriptionally up-regulated in young seedlings and in response to salt stress. It is unlikely to play a role in salt-stress-induced proline accumulation, however, it appears to participate in arginine and ornithine catabolism.	protein_coding	ORNITHINE-DELTA-AMINOTRANSFERASE (DELTA-OAT)	ORNITHINE-DELTA-AMINOTRANSFERASE (DELTA-OAT)	0.344501	5.85757	10.0096	0.0015573
AT5G24740	AT5G24740.1	Encodes a vacuolar sorting protein that interacts with the plant-specific GRAS family transcription factor SHORT-ROOT and acts in a pathway that controls root growth and radial patterning. It provides a connections between gibberellic acid, SHR and PLT signaling in the root.	protein_coding	SHRUBBY (SHBY)	SHRUBBY (SHBY)	0.344873	5.70199	7.91677	0.00489788
AT5G26760	AT5G26760.2	Encodes RPAP2 IYO Mate (RIMA), a homologue of yeast and human proteins linked to nuclear import of selective cargo. Knockdown of RIMA causes delayed onset of cell differentiation.	protein_coding	RPAP2 IYO MATE (RIMA)	RPAP2 IYO MATE (RIMA)	0.346263	5.34623	13.3539	0.000257889
AT5G02150	AT5G02150.1	Encodes one of the Arabidopsis orthologs of the human Hsp70-binding protein 1 (HspBP-1) and yeast Fes1p: Fes1A (AT3G09350), Fes1B (AT3G53800), Fes1C (AT5G02150).	protein_coding	FES1C (Fes1C)	FES1C (Fes1C)	0.34638	3.6332	8.39781	0.00375674
AT2G25010	AT2G25010.1	Encodes a nuclear localized aminotransferase like protein containing a plant mobile domain. MAIL1 is expressed in the root, SAM, leaves, flowers and embryo. Loss of function mutations display defects in root and shoot growth. In the root, primary root growth terminates early. In the shoot, leaf development is delayed, and lateral organs are smaller than normal. MAIL1 appears to affect meristem ce…	protein_coding	MAIN-LIKE 1 (MAIL1)	MAIN-LIKE 1 (MAIL1)	0.346527	4.59095	9.30126	0.00228996
AT1G09730	AT1G09730.1	Encodes a SUMO protease that positively regulates the transition to flowering in long and short days. Along with SPF2, its activity is required for fertility as asp1/spf2 double mutants have defects in gametogenesis and embroygenesis.	protein_coding	ARABIDOPSIS SUMO PROTEASE 1 (ASP1)	SUMO PROTEASE RELATED TO FERTILITY1 (SPF1);ARABIDOPSIS SUMO PROTEASE 1 (ASP1)	0.346804	5.81401	9.42302	0.00214279
AT4G37480	AT4G37480.1	Chaperone DnaJ-domain superfamily protein;(source:Araport11)	protein_coding			0.346912	3.88456	8.38528	0.00378272
AT5G55060	AT5G55060.1	Rab3 GTPase-activating protein catalytic subunit;(source:Araport11)	protein_coding			0.348025	5.65629	11.3756	0.00074417
AT3G02300	AT3G02300.1	Regulator of chromosome condensation (RCC1) family protein;(source:Araport11)	protein_coding			0.348401	6.02576	10.976	0.000922971
AT4G03030	AT4G03030.1	Galactose oxidase/kelch repeat superfamily protein;(source:Araport11)	protein_coding			0.348438	5.46924	8.22266	0.00413705
AT1G10170	AT1G10170.1	Encodes AtNFXL1, a homologue of the putative human transcription repressor NF-X1. Functions as a negative regulator of the trichothecene phytotoxin-induced defense response.	protein_coding	NF-X-LIKE 1 (NFXL1)	NF-X-LIKE 1 (ATNFXL1);NF-X-LIKE 1 (NFXL1)	0.348959	6.33971	8.90498	0.00284394
AT5G65110	AT5G65110.1	Encodes an acyl-CoA oxidase presumably involved in long chain fatty acid biosynthesis.	protein_coding	ACYL-COA OXIDASE 2 (ACX2)	(ATACX2);ACYL-COA OXIDASE 2 (ACX2)	0.349588	7.25947	12.34	0.00044335
AT2G45620	AT2G45620.1	Nucleotidyltransferase family protein involved in transcript polyadenylation. TUTase which connects decapping activators and prevents the accumulation of excessively deadenylated mRNAs to avoid siRNA biogenesis.	protein_coding	UTP:RNA URIDYLYLTRANSFERASE 1 (URT1)	UTP:RNA URIDYLYLTRANSFERASE 1 (URT1)	0.351566	6.65247	12.1991	0.000478123
AT2G45330	AT2G45330.1	RNA 2-phosphotransferase, Tpt1 / KptA family;(source:Araport11)	protein_coding	EMBRYO DEFECTIVE 1067 (emb1067)	2' TRNA PHOSPHOTRANSFERASE (TRPT);EMBRYO DEFECTIVE 1067 (emb1067)	0.352047	5.56695	9.34292	0.00223848
AT5G44790	AT5G44790.1	ATP dependent copper transporter vital for ethylene response pathway	protein_coding	RESPONSIVE-TO-ANTAGONIST 1 (RAN1)	RESPONSIVE-TO-ANTAGONIST 1 (RAN1);HEAVY METAL ASSOCIATED PROTEIN 51 (ATHMP51); (HMA7)	0.352164	8.61272	10.6268	0.00111459
AT2G13370	AT2G13370.1	Chromatin-remodeling factor; has large number of MAPK docking sites (D-sites).	protein_coding	CHROMATIN REMODELING 5 (CHR5)	CHROMATIN REMODELING 5 (CHR5)	0.352338	6.46461	11.2691	0.000788076
AT3G61740	AT3G61740.1	Encodes SET domain containing protein that acts redundantly with ATX4/5 to regulate histone H3-K4 methylation. Involved in bolting/flowering time together with ATX1 and ATX4.	protein_coding	SET DOMAIN PROTEIN 14 (SDG14)	ARABIDOPSIS TRITHORAX 3 (ATX3);SET DOMAIN PROTEIN 14 (SDG14)	0.35365	3.98018	8.77605	0.00305212
AT4G36520	AT4G36520.1	Chaperone DnaJ-domain superfamily protein;(source:Araport11)	protein_coding	AUXILIN-LIKE4 (AUXILIN-LIKE4)	AUXILIN-LIKE4 (AUXILIN-LIKE4)	0.35408	5.61141	9.04978	0.00262727
AT5G13980	AT5G13980.1	Glycosyl hydrolase family 38 protein;(source:Araport11)	protein_coding			0.354631	6.97117	12.6439	0.000376798
AT3G05690	AT3G05690.1	Encodes a subunit of CCAAT-binding complex, binds to CCAAT box motif present in some plant promoter sequences. One of three members of this class (HAP2A, HAP2B, HAP2C), it is expressed in vegetative and reproductive tissues.	protein_coding	NUCLEAR FACTOR Y, SUBUNIT A2 (NF-YA2)	UNFERTILIZED EMBRYO SAC 8 (UNE8);HEME ACTIVATOR PROTEIN (YEAST) HOMOLOG 2B (ATHAP2B); (ATNF-YA2);NUCLEAR FACTOR Y, SUBUNIT A2 (NF-YA2);HEME ACTIVATOR PROTEIN (YEAST) HOMOLOG 2B (HAP2B)	0.354738	4.30456	9.05063	0.00262605
AT1G72150	AT1G72150.1	novel cell-plate-associated protein that is related in sequence to proteins involved in membrane trafficking in other eukaryotes The mRNA is cell-to-cell mobile.	protein_coding	PATELLIN 1 (PATL1)	PATELLIN 1 (PATL1)	0.355166	9.45519	10.5801	0.00114311
AT4G21540	AT4G21540.1	Encodes a sphingosine kinase, also has enzyme activity towards other plant long-chain sphingoid bases. Involved in guard cell ABA signalling and seed germination.	protein_coding	SPHINGOSINE KINASE 1 (SPHK1)	SPHINGOSINE KINASE 1 (SPHK1)	0.356264	5.33824	11.1089	0.000859155
AT5G28900	AT5G28900.1	Calcium-binding EF-hand family protein;(source:Araport11)	protein_coding			0.356913	5.46798	13.5444	0.000232984
AT4G10840	AT4G10840.1	CMU1 and CMU2 along with FRA1 contributes to lateral stability of cortical microtubules.	protein_coding	KINESIN LIGHT CHAIN-RELATED 1 (KLCR1)	(CMU1);KINESIN LIGHT CHAIN-RELATED 1 (KLCR1)	0.357095	7.77294	13.046	0.000303933
AT3G44190	AT3G44190.1	FAD/NAD(P)-binding oxidoreductase family protein;(source:Araport11)	protein_coding			0.357559	7.18107	8.38375	0.00378591
AT4G37870	AT4G37870.1	Encodes a phosphoenolpyruvate carboxykinase that localizes to the cytosol.	protein_coding	PHOSPHOENOLPYRUVATE CARBOXYKINASE 1 (PCK1)	PHOSPHOENOLPYRUVATE CARBOXYKINASE (PEPCK);PHOSPHOENOLPYRUVATE CARBOXYKINASE 1 (PCK1)	0.358233	9.02852	9.83581	0.00171147
AT5G42180	AT5G42180.1	Peroxidase required for casparian strip lignification as well as partially required for SGN-dependent compensatory lignification.	protein_coding	PEROXIDASE 64 (PER64)	(PRX64);PEROXIDASE 64 (PER64)	0.358687	6.12912	9.55885	0.00198988
AT2G01420	AT2G01420.2	Encodes a putative auxin efflux carrier that is localized in developing and mature root meristems. It is involved in the maintenance of embryonic auxin gradients. A role for AtPIN4 in generating a sink for auxin below the quiescent center of the root meristem that is essential for auxin distribution and patterning is proposed. In the root, PIN4 is detected around the quiescent center and cells su…	protein_coding	PIN-FORMED 4 (PIN4)	PIN-FORMED 4 (PIN4)	0.359552	5.18572	8.02741	0.00460747
AT1G61360	AT1G61360.1	S-locus lectin protein kinase family protein;(source:Araport11)	protein_coding			0.360001	4.61957	10.7646	0.00103457
AT3G24550	AT3G24550.1	Encodes a member of the proline-rich extensin-like receptor kinase (PERK) family. This family consists of 15 predicted receptor kinases (PMID: 15653807). The mRNA is cell-to-cell mobile.	protein_coding	PROLINE-RICH EXTENSIN-LIKE RECEPTOR KINASE 1 (PERK1)	PROLINE-RICH EXTENSIN-LIKE RECEPTOR KINASE 1 (PERK1);PROLINE-RICH EXTENSIN-LIKE RECEPTOR KINASE 1 (ATPERK1)	0.360387	7.18491	9.79386	0.00175096
AT1G14740	AT1G14740.1	Encodes a PHD-finger protein that, with TTA1, is redundantly required for MP-dependent embryonic root meristem initiation.	protein_coding	TITANIA 1 (TTA1)	(OBE3);TITANIA 1 (TTA1)	0.360826	7.23125	12.9169	0.000325623
AT3G14680	AT3G14680.1	putative cytochrome P450	protein_coding	CYTOCHROME P450, FAMILY 72, SUBFAMILY A, POLYPEPTIDE 14 (CYP72A14)	CYTOCHROME P450, FAMILY 72, SUBFAMILY A, POLYPEPTIDE 14 (CYP72A14)	0.360829	6.68623	9.41489	0.0021523
AT4G04740	AT4G04740.2	member of Calcium Dependent Protein Kinase	protein_coding	CALCIUM-DEPENDENT PROTEIN KINASE 23 (CPK23)	GROWTH CONTROLLED BY ABSCISSIC ACID 2 (GCA2); (GCA2);CALCIUM-DEPENDENT PROTEIN KINASE 23 (CPK23)	0.360888	5.25093	9.32203	0.00226415
AT1G62422	AT1G62422.1	hypothetical protein;(source:Araport11)	protein_coding			0.361106	3.96554	8.57077	0.00341603
AT1G26440	AT1G26440.3	Encodes a ureide permease, uptake assays in yeast mutants indicated the longer splice variant is a cellular importer for allantoin, uracil and xanthine. Encodes 2 splice variants, UPS5L and UPS5S, which under nonstress conditions may function in allantoin degradation for nutrient recycling, whereas under stress, both genes may be involved in vesicular export allowing allantoin translocation from …	protein_coding	UREIDE PERMEASE 5 (UPS5)	UREIDE PERMEASE 5 (UPS5); (UPS5);UREIDE PERMEASE 5 (ATUPS5)	0.361324	6.34443	9.28463	0.00231084
AT4G13580	AT4G13580.1	Disease resistance-responsive (dirigent-like protein) family protein;(source:Araport11)	protein_coding			0.36148	5.64214	12.658	0.000373957
AT4G02520	AT4G02520.1	Encodes glutathione transferase belonging to the phi class of GSTs. Naming convention according to Wagner et al. (2002). The expression of this gene is upregulated by herbicide safeners such as benoxacor and fenclorim.	protein_coding	GLUTATHIONE S-TRANSFERASE PHI 2 (GSTF2)	GLUTATHIONE S-TRANSFERASE PHI 2 (ATGSTF2); (ATPM24.1);GLUTATHIONE S-TRANSFERASE PHI 2 (GSTF2); (GST2); (ATPM24)	0.361554	7.02808	7.95035	0.0048078
AT3G48380	AT3G48380.3	Peptidase C78, ubiquitin fold modifier-specific peptidase 1/ 2;(source:Araport11)	protein_coding			0.362023	5.83452	11.1737	0.000829668
AT3G59210	AT3G59210.1	F-box/RNI-like superfamily protein;(source:Araport11)	protein_coding			0.362102	5.74897	11.3291	0.000763001
AT4G32820	AT4G32820.2	Tetratricopeptide repeat (TPR)-like superfamily protein;(source:Araport11)	protein_coding	CALCINEURIN BINDING PROTEIN 1 (CABIN1)	CALCINEURIN BINDING PROTEIN 1 (CABIN1)	0.362451	5.03187	11.0939	0.000866102
AT3G59100	AT3G59100.1	encodes a protein similar to callose synthase	protein_coding	GLUCAN SYNTHASE-LIKE 11 (GSL11)	GLUCAN SYNTHASE-LIKE 11 (ATGSL11);GLUCAN SYNTHASE-LIKE 11 (GSL11); (gsl11)	0.362582	5.98616	7.94611	0.0048191
AT5G41790	AT5G41790.1	encodes a protein that physically interacts specifically with the putative coiled-coil region of COP1 in vitro. In hypocotyl and cotyledon protoplasts, it is associated to the cytoskeleton, but not in the root. expression is not regulated by light. The mRNA is cell-to-cell mobile.	protein_coding	COP1-INTERACTIVE PROTEIN 1 (CIP1)	COP1-INTERACTIVE PROTEIN 1 (CIP1)	0.362777	6.89388	15.5542	8.01734e-05
AT2G22630	AT2G22630.1	Encodes a MADs domain containing protein involved in promoting flowering. Loss of function mutations show delayed flowering in long days and reduced levels of LFY and AP1 expression.	protein_coding	AGAMOUS-LIKE 17 (AGL17)	AGAMOUS-LIKE 17 (AGL17)	0.36285	3.74561	7.74338	0.00539099
AT1G50520	AT1G50520.1	member of CYP705A The mRNA is cell-to-cell mobile.	protein_coding	CYTOCHROME P450, FAMILY 705, SUBFAMILY A, POLYPEPTIDE 27 (CYP705A27)	CYTOCHROME P450, FAMILY 705, SUBFAMILY A, POLYPEPTIDE 27 (CYP705A27)	0.363141	4.20851	9.40016	0.00216967
AT4G19500	AT4G19500.1	nucleoside-triphosphatase/transmembrane receptor/nucleotide binding/ATP binding protein;(source:Araport11)	protein_coding			0.36454	5.16354	11.5762	0.000668015
AT5G12480	AT5G12480.1	calmodulin-domain protein kinase CDPK isoform 7 (CPK7)	protein_coding	CALMODULIN-DOMAIN PROTEIN KINASE 7 (CPK7)	CALMODULIN-DOMAIN PROTEIN KINASE 7 (CPK7)	0.364889	6.13244	13.1665	0.000285001
AT4G28710	AT4G28710.1	member of Myosin-like proteins The mRNA is cell-to-cell mobile.	protein_coding	(XIH)	MYOSIN XI H (ATXIH); (XIH)	0.364985	6.31271	8.43934	0.0036719
AT2G26510	AT2G26510.1	Encodes a plasma-membrane localized nucleobase transporter capable of transporting adenine, guanine, uracil and hypoxanthine. Likely to be a proton-nucleobase symporter.	protein_coding	PIGMENT DEFECTIVE EMBRYO 135 (PDE135)	NUCLEOBASE ASCORBATE TRANSPORTER 3 (NAT3);PIGMENT DEFECTIVE EMBRYO 135 (PDE135)	0.36529	6.30272	14.5596	0.000135792
AT3G57400	AT3G57400.1	transmembrane protein;(source:Araport11)	protein_coding			0.366149	4.61393	9.16236	0.00247043
AT4G36080	AT4G36080.1	Component of the SPT module of the SAGA complex.	protein_coding	(TRA1B)	(TRA1B)	0.366626	5.77781	12.472	0.000413095
AT5G11000	AT5G11000.1	hypothetical protein (DUF868);(source:Araport11)	protein_coding			0.36715	5.66759	9.47854	0.00207889
AT3G14660	AT3G14660.1	putative cytochrome P450 The mRNA is cell-to-cell mobile.	protein_coding	CYTOCHROME P450, FAMILY 72, SUBFAMILY A, POLYPEPTIDE 13 (CYP72A13)	CYTOCHROME P450, FAMILY 72, SUBFAMILY A, POLYPEPTIDE 13 (CYP72A13)	0.368545	7.56331	10.076	0.00150215
AT5G44380	AT5G44380.1	FAD-binding Berberine family protein;(source:Araport11)	protein_coding	(AtBBE24)	(AtBBE24)	0.368735	8.52452	11.3259	0.000764335
AT4G25240	AT4G25240.1	Encodes GPI-anchored SKU5-like protein. Acts redundantly with SKU5 and SKS1 in roots.	protein_coding	SKU5 SIMILAR 1 (SKS1)	SKU5 SIMILAR 1 (SKS1)	0.368786	5.09225	8.94703	0.0027792
AT4G20850	AT4G20850.1	Tripeptidyl Peptidase II. Ser protease that assembles into a large oligomeric complex containing two proteins of 153 and 142 kD that are derived from a single TPP2 gene, with the smaller version missing part of the C-terminal end. Not essential, based on the lack of phenotype of a T-DNA disruption mutant.	protein_coding	TRIPEPTIDYL PEPTIDASE II (TPP2)	TRIPEPTIDYL PEPTIDASE II (TPP2)	0.369855	8.48687	17.3895	3.04496e-05
AT1G06850	AT1G06850.1	bZIP protein involved in heat stress response. Under heat stress localization moves exclusively to nucleus.	protein_coding	BASIC LEUCINE-ZIPPER 52 (bZIP52)	BASIC LEUCINE-ZIPPER 52 (bZIP52);BASIC LEUCINE-ZIPPER 52 (AtbZIP52)	0.370001	4.11962	9.682	0.00186082
AT1G02260	AT1G02260.1	Divalent ion symporter;(source:Araport11)	protein_coding			0.370041	4.68046	8.24013	0.00409743
AT1G70300	AT1G70300.1	potassium transporter	protein_coding	K+ UPTAKE PERMEASE 6 (KUP6)	K+ UPTAKE PERMEASE 6 (KUP6)	0.370144	6.62899	17.9358	2.28484e-05
AT2G46340	AT2G46340.1	Encodes a member of the SPA (suppressor of phyA-105) protein family (SPA1-SPA4). SPA proteins contain an N-terminal serine/threonine kinase-like motif followed by a coiled-coil structure and a C-terminal WD-repeat domain. SPA1 is a PHYA signaling intermediate, putative regulator of PHYA signaling pathway. Light responsive repressor of photomorphogenesis. Involved in regulating circadian rhythms a…	protein_coding	SUPPRESSOR OF PHYA-105 1 (SPA1)	SUPPRESSOR OF PHYA-105 1 (SPA1)	0.370266	6.59302	12.7119	0.000363339
AT3G07420	AT3G07420.1	Encodes an asparaginyl-tRNA synthetase.	protein_coding	ASPARAGINYL-TRNA SYNTHETASE 2 (NS2)	ASPARAGINYL-TRNA SYNTHETASE 2 (NS2);SYNTHETASE C2 (SYNC2);ASPARAGINYL-TRNA SYNTHETASE 2 (SYNC2_ARATH);ASPARAGINYL-TRNA SYNTHETASE 2 (ATNS2)	0.370561	4.47389	9.78791	0.00175663
AT3G44670	AT3G44670.1	Disease resistance protein (TIR-NBS-LRR class) family;(source:Araport11)	protein_coding	DANGEROUS MIX2H (DM2H)	DANGEROUS MIX2H (DM2H)	0.370872	5.25212	9.77994	0.00176426
AT4G15380	AT4G15380.1	member of CYP705A	protein_coding	CYTOCHROME P450, FAMILY 705, SUBFAMILY A, POLYPEPTIDE 4 (CYP705A4)	CYTOCHROME P450, FAMILY 705, SUBFAMILY A, POLYPEPTIDE 4 (CYP705A4)	0.37109	3.75751	11.2753	0.000785445
AT2G40820	AT2G40820.1	stomatal closure actin-binding-like protein;(source:Araport11)	protein_coding			0.372308	5.14031	9.45267	0.00210842
AT2G37050	AT2G37050.3	Leucine-rich repeat protein kinase family protein;(source:Araport11)	protein_coding	SALT INDUCED MALECTIN-LIKE DOMAIN-CONTAINING PROTEIN1 (SIMP1)	SALT INDUCED MALECTIN-LIKE DOMAIN-CONTAINING PROTEIN1 (SIMP1)	0.373635	6.40911	17.707	2.57676e-05
AT5G05690	AT5G05690.1	Encodes a member of the CP90A family, a cytochrome P450 monooxygenase which converts 6-deoxocathasterone to 6-deoxoteasterone in the late C6 oxidation pathway and cathasterone to teasterone in the early C6 oxidation pathway of brassinolide biosynthesis. Expressed in cotyledons and leaves. Mutants display de-etiolation and derepression of light-induced genes in the dark, dwarfism, male sterility a…	protein_coding	CONSTITUTIVE PHOTOMORPHOGENIC DWARF (CPD)	CONSTITUTIVE PHOTOMORPHOGENIC DWARF (CPD); (CYP90A);CYTOCHROME P450 90A1 (CYP90A1);CABBAGE 3 (CBB3);DWARF 3 (DWF3); (CYP90)	0.373722	5.43564	9.86439	0.00168508
AT2G41700	AT2G41700.1	ATP-binding cassette A1;(source:Araport11)	protein_coding	ATP-BINDING CASSETTE A1 (ABCA1)	ARABIDOPSIS THALIANA ATP-BINDING CASSETTE A1 (AtABCA1);ATP-BINDING CASSETTE A1 (ABCA1)	0.373843	5.93034	8.84349	0.00294136
AT5G07740	AT5G07740.1	actin binding protein;(source:Araport11)	protein_coding			0.374043	6.57949	11.2974	0.000776169
AT5G19330	AT5G19330.1	Encodes an armadillo repeat protein involved in the abscisic acid response. The protein interacts with a transcription factor, ABF2, which controls ABA-dependent gene expression via the G-box-type ABA-responsive elements.	protein_coding	ARM REPEAT PROTEIN INTERACTING WITH ABF2 (ARIA)	ARM REPEAT PROTEIN INTERACTING WITH ABF2 (ARIA)	0.374097	7.00953	15.154	9.90876e-05
AT4G18140	AT4G18140.1	Encodes a SCP1-like small phosphatase (SSP). Three SSPs form a unique group with long N-terminal extensions: AT5G46410 (SSP4), AT5G11860 (SSP5), AT4G18140 (SSP4b). SSP4 and SSP4b were localized exclusively in the nuclei, whereas SSP5 accumulated in both nuclei and cytoplasm. All three SSPs encodes active CTD phosphatases like animal SCP1 family proteins, with distinct substrate specificities: SSP…	protein_coding	SCP1-LIKE SMALL PHOSPHATASE 4B (SSP4b)	SCP1-LIKE SMALL PHOSPHATASE 4B (SSP4b)	0.374143	4.51249	11.23	0.000804871
AT3G03300	AT3G03300.1	Encodes a Dicer-like protein that functions in the antiviral silencing response in turnip-crinkle virus-infected plants but not in TMV or CMV-strain-Y-infected plants. Involved in the production of ta-siRNAs. Partially antagonizes the production of miRNAs by DCL1. Substitutes for DCL4 to produce viral siRNA when DCL4 is missing or inhibited. Able to produce siRNAs but not miRNAs.	protein_coding	DICER-LIKE 2 (DCL2)	DICER-LIKE 2 (DCL2);DICER-LIKE 2 (ATDCL2)	0.37418	4.945	9.2308	0.00237978
AT2G03890	AT2G03890.1	Phosphoinositide kinase which undergo autophosphorylation and phosphorylate serine/threonine residues of protein substrates. Contains phosphoinositide 3/4-kinase and ubiquitin-like domains. The mRNA is cell-to-cell mobile.	protein_coding	PHOSPHOINOSITIDE 4-KINASE GAMMA 7 (PI4K GAMMA 7)	UBIQUITIN-LIKE DOMAIN KINASE GAMMA 7 (UBDK GAMMA 7);PHOSPHOINOSITIDE 4-KINASE GAMMA 7 (PI4K GAMMA 7);PHOSPHOINOSITIDE 4-KINASE GAMMA 7 (ATPI4K GAMMA 7)	0.374532	7.26585	10.9497	0.000936188
AT1G68820	AT1G68820.1	Putative C3HC4 zinc-finger ubiquitin E3 ligase, negative regulator in ABA and drought stress response. May act as a positive role in regulating the high temperature by mediating the degradation of unknown target proteins.	protein_coding	PROTEIN WITH THE RING DOMAIN AND TMEMB_185A 1 (PPRT1)	PROTEIN WITH THE RING DOMAIN AND TMEMB_185A 1 (PPRT1)	0.374755	5.9051	12.3064	0.000451407
AT2G30840	AT2G30840.1	encodes a protein whose sequence is similar to 2-oxoglutarate-dependent dioxygenase	protein_coding			0.375173	4.93257	9.35933	0.00221854
AT1G02890	AT1G02890.1	AAA-type ATPase family protein;(source:Araport11)	protein_coding			0.375469	7.18872	13.6597	0.000219108
AT1G11310	AT1G11310.1	A member of a large family of seven-transmembrane domain proteins specific to plants, homologs of the barley mildew resistance locus o (MLO) protein. The Arabidopsis genome contains 15 genes encoding MLO proteins, with localization in plasma membrane. Phylogenetic analysis revealed four clades of closely-related AtMLO genes. ATMLO2 belongs to the clade IV, with AtMLO3, AtMLO6 and AtMLO12. The gen…	protein_coding	MILDEW RESISTANCE LOCUS O 2 (MLO2)	MILDEW RESISTANCE LOCUS O 2 (MLO2);POWDERY MILDEW RESISTANT 2 (PMR2);MILDEW RESISTANCE LOCUS O 2 (ATMLO2)	0.375783	6.7239	13.9122	0.000191547
AT3G01770	AT3G01770.1	Bromodomain protein that functions as a negative regulator of sugar and ABA signaling.	protein_coding	BROMODOMAIN AND EXTRATERMINAL DOMAIN PROTEIN 10 (BET10)	BROMODOMAIN AND EXTRATERMINAL DOMAIN PROTEIN 10 (ATBET10);GLOBAL TRANSCRIPTION FACTOR GROUP E 11 (GTE11);BROMODOMAIN AND EXTRATERMINAL DOMAIN PROTEIN 10 (BET10)	0.376634	6.41922	10.6671	0.00109057
AT1G75750	AT1G75750.1	GA-responsive GAST1 protein homolog regulated by BR and GA antagonistically. Possibly involved in cell elongation based on expression data The mRNA is cell-to-cell mobile.	protein_coding	GAST1 PROTEIN HOMOLOG 1 (GASA1)	GAST1 PROTEIN HOMOLOG 1 (GASA1)	0.376953	8.71792	10.3104	0.0013228
AT5G08790	AT5G08790.1	induced by wounding, belongs to a large family of putative transcriptional activators with NAC domain.	protein_coding	(ATAF2)	(ATAF2);ARABIDOPSIS NAC DOMAIN CONTAINING PROTEIN 81 (anac081)	0.378098	6.52939	11.7065	0.000622814
AT5G12010	AT5G12010.1	nuclease;(source:Araport11)	protein_coding			0.378364	5.00391	10.0638	0.00151207
AT1G20920	AT1G20920.1	P-loop containing nucleoside triphosphate hydrolases superfamily protein;(source:Araport11)	protein_coding	REGULATOR OF CBF GENE EXPRESSION 1 (RCF1)	REGULATOR OF CBF GENE EXPRESSION 1 (RCF1)	0.378972	6.22251	9.26019	0.00234188
AT1G51860	AT1G51860.1	Leucine-rich repeat protein kinase family protein;(source:Araport11)	protein_coding			0.379034	5.77465	15.753	7.21744e-05
AT4G31570	AT4G31570.1	nucleoporin;(source:Araport11)	protein_coding			0.379045	6.13349	10.2664	0.00135476
AT2G30250	AT2G30250.1	member of WRKY Transcription Factor; Group I. Located in nucleus. Involved in response to various abiotic stresses - especially salt stress.	protein_coding	WRKY DNA-BINDING PROTEIN 25 (WRKY25)	(AtWRKY25);WRKY DNA-BINDING PROTEIN 25 (WRKY25)	0.379295	5.1779	8.99011	0.00271444
AT3G27170	AT3G27170.1	member of Anion channel protein family The mRNA is cell-to-cell mobile.	protein_coding	CHLORIDE CHANNEL B (CLC-B)	(ATCLC-B);CHLORIDE CHANNEL B (CLC-B)	0.379313	6.03446	10.0732	0.00150441
AT4G21980	AT4G21980.2	Encodes APG8, a component of autophagy conjugation pathway. Delivered to the lumens of vacuole under nitrogen-starvation condition. Highest expression in flowers. mRNA abundance increased during dark-induced carbon starvation. Predominantly cytoplasmic with or without N starvation. Upon concanamycin A the protein accumulates in the central vacuole as punctuate structures that resemble autophagic …	protein_coding	AUTOPHAGY 8A (APG8A)	AUTOPHAGY-RELATED 8A (ATG8A);AUTOPHAGY 8A (APG8A)	0.379691	6.69415	10.0373	0.00153404
AT1G73330	AT1G73330.1	encodes a plant-specific protease inhibitor-like protein whose transcript level in root disappears in response to progressive drought stress. The decrease in transcript level is independent from abscisic acid level.	protein_coding	DROUGHT-REPRESSED 4 (DR4)	DROUGHT-REPRESSED 4 (DR4);DROUGHT-REPRESSED 4 (ATDR4)	0.380108	11.0232	8.03008	0.00460068
AT1G05890	AT1G05890.2	RING/U-box superfamily protein;(source:Araport11)	protein_coding	ARIADNE 5 (ARI5)	ARIADNE 5 (ARI5)	0.380244	6.96867	8.0338	0.00459124
AT5G44030	AT5G44030.1	Encodes a cellulose synthase involved in secondary cell wall biosynthesis. Confers resistance towards bacterial and fungal pathogens, independent of salicylic acid, ethylene and jasmonate signaling. The mRNA is cell-to-cell mobile.	protein_coding	CELLULOSE SYNTHASE A4 (CESA4)	IRREGULAR XYLEM 5 (IRX5);CELLULOSE SYNTHASE A4 (CESA4); (NWS2)	0.38047	5.85268	16.1787	5.76378e-05
AT2G11225	AT2G11225.1	hypothetical protein;(source:Araport11)	protein_coding			0.380509	7.64605	12.1917	0.000480026
AT1G26665	AT1G26665.2	Mediator complex, subunit Med10;(source:Araport11)	protein_coding	MEDIATOR 10B (MED10B)	MEDIATOR 10B (MED10B)	0.380652	5.31232	7.82877	0.0051421
AT2G37150	AT2G37150.3	RING/U-box superfamily protein;(source:Araport11)	protein_coding	(CTL10)	(CTL10)	0.381033	4.80473	8.99321	0.00270984
AT1G10940	AT1G10940.2	Encodes a plant protein kinase similar to the calcium/calmodulin-dependent protein kinase subfamily and the SNF1 kinase subfamily (SnRK2) whose activity is activated by ionic (salt) and non-ionic (mannitol) osmotic stress. Kinase activity of its homolog in tobacco is induced by hyperosmotic condition within 1 minute. Phosphatidylinositol 4-phosphate 5-kinase (PIP5K) enzyme family member.	protein_coding	SNF1-RELATED PROTEIN KINASE 2.4 (SNRK2.4)	SNF1-RELATED PROTEIN KINASE 2.4 (SNRK2.4);SUCROSE NONFERMENTING 1-RELATED PROTEIN KINASE 2-4 (SNRK2-4);ARABIDOPSIS SERINE/THREONINE KINASE 1 (ASK1); (SRK2A)	0.381255	6.66328	13.0981	0.0002956
AT1G58230	AT1G58230.1	binding protein;(source:Araport11)	protein_coding	BEACH-DOMAIN HOMOLOG B (BCHB)	BEACH-DOMAIN HOMOLOG B (BCHB)	0.381431	5.84402	11.4473	0.000715975
AT4G09150	AT4G09150.2	T-complex protein 11;(source:Araport11)	protein_coding			0.381837	6.27501	9.89745	0.00165508
AT2G36810	AT2G36810.1	Specifically involved in gravity perception and/or gravity signal transduction for the shoot gravitropic response. Effects gravitropism only in inflorescence stems but normal in both hypocotyls and roots.	protein_coding	SHOOT GRAVITROPISM 6 (SGR6)	SHOOT GRAVITROPISM 6 (SGR6)	0.381978	5.93515	17.0696	3.6035e-05
AT4G18780	AT4G18780.1	Encodes a member of the cellulose synthase family involved in secondary cell wall biosynthesis. Mutants have abnormal xylem formation, reduced cellulose content, and enhanced drought and osmotic stress tolerance. Mediates resistance towards bacterial pathogens via ABA. Confers resistance towards bacterial and fungal pathogens, independent of salicylic acid, ethylene and jasmonate signaling.	protein_coding	IRREGULAR XYLEM 1 (IRX1)	CELLULOSE SYNTHASE 8 (CESA8);LEAF WILTING 2 (LEW2);CELLULOSE SYNTHASE 8 (ATCESA8);IRREGULAR XYLEM 1 (IRX1)	0.382953	5.13777	10.8581	0.000983642
AT5G02310	AT5G02310.1	Encodes PROTEOLYSIS6 (PRT6), a component of the N-end rule pathway that targets protein degradation through the identity of the amino-terminal residue of specific protein substrates. Another component of the N-end rule pathway is arginyl-tRNA:protein arginyltransferase (ATE). Arabidopsis contains two ATE genes: At5g05700/ATE1, At3g11240/ATE2. PRT6 and ATE were shown to regulate seed after-ripenin…	protein_coding	PROTEOLYSIS 6 (PRT6)	PROTEOLYSIS 6 (PRT6);GREENING AFTER EXTENDED DARKNESS 1 (GED1)	0.383277	6.61643	14.799	0.000119598
AT5G40910	AT5G40910.1	Disease resistance protein (TIR-NBS-LRR class) family;(source:Araport11)	protein_coding			0.38388	6.25949	9.6851	0.00185769
AT3G23470	AT3G23470.1	Cyclopropane-fatty-acyl-phospholipid synthase;(source:Araport11)	protein_coding			0.384365	5.5248	15.6834	7.48795e-05
AT5G56340	AT5G56340.1	RING/U-box superfamily protein;(source:Araport11)	protein_coding	(ATCRT1)	BCA2A ZINC FINGER ATL 4 (BTL04); (ATCRT1)	0.384446	5.04394	11.3309	0.000762275
AT2G32240	AT2G32240.1	PAMP induced protein involved in defense response. Interaction with UBAC2 proteins in the ER, is necessary for PAMP mediated accumulation of the callose synthase PMR4.	protein_coding	PAMP-INDUCED COILED COIL (PICC)	PAMP-INDUCED COILED COIL (PICC)	0.384517	8.03905	14.8751	0.000114868
AT3G61260	AT3G61260.1	Lipid raft regulatory protein, crucial for plasma membrane nanodomain assembly to control plasmodesmata aperture and functionality. Negatively regulates the cell-to-cell movement of TuMV via competition with PCaP1 for binding actin filaments.	protein_coding	REMORIN 1.2 (REM1.2)	REMORIN 1.2 (REM1.2)	0.384544	8.06831	10.9044	0.000959359
AT4G37010	AT4G37010.2	Encodes a member of the Centrin family. Mutants are hypersensitive to UV and prone to UV induced DNA damage. Based on sequence similarity and mutant phenotype CEN2 is thought to be involved in nucelotide excision repair/DNA repair.	protein_coding	CENTRIN 2 (CEN2)	CALMODULIN-LIKE 19 (CML19);CENTRIN 2 (CEN2)	0.384563	6.34154	9.5692	0.00197869
AT5G20320	AT5G20320.1	Encodes an RNase III-like enzyme that catalyzes processing of trans-acting small interfering RNA precursors in a distinct small RNA biogenesis pathway. The protein is also involved in the production of 21-nt primary siRNAs from both inverted-repeat constructs and endogenous sequences, as well as the RDR6-dependent 21-nt secondary siRNAs involved in long-range cell-to-cell signaling. It binds DRB4…	protein_coding	DICER-LIKE 4 (DCL4)	DICER-LIKE 4 (ATDCL4);DICER-LIKE 4 (DCL4)	0.385381	5.00668	10.716	0.00106214
AT5G11270	AT5G11270.1	Encodes a homeodomain transcription factor involved in mediating resistance to infection by necrotrophic pathogens dependent on perception of jasmonic acid through COI1. Expressed in the nucleus. Downregulated upon fungal infection. Also involved in drought tolerance.	protein_coding	OVEREXPRESSOR OF CATIONIC PEROXIDASE 3 (OCP3)	OVEREXPRESSOR OF CATIONIC PEROXIDASE 3 (OCP3)	0.386685	4.12122	9.98585	0.00157748
AT3G07780	AT3G07780.1	Encodes a nuclear PHD finger protein that is functionally redundant with OBE2 and plays an important role in the maintenance and/or establishment of the root and shoot apical meristems. The mRNA is cell-to-cell mobile.	protein_coding	OBERON1 (OBE1)	OBERON1 (OBE1)	0.387429	6.75609	10.746	0.00104502
AT3G61010	AT3G61010.2	Ferritin/ribonucleotide reductase-like family protein;(source:Araport11)	protein_coding			0.387469	5.64557	8.42251	0.00370604
AT5G46840	AT5G46840.1	RNA-binding (RRM/RBD/RNP motifs) family protein;(source:Araport11)	protein_coding			0.387561	6.21342	13.7701	0.000206593
AT5G65050	AT5G65050.3	Originally published as Agamous like MADS-box protein AGL31. One of a group of MADS box genes involved in control of flowering time. Four variant sequences have been identified for this locus but have not been characterized for differences in expression pattern and/or function.	protein_coding	AGAMOUS-LIKE 31 (AGL31)	MADS AFFECTING FLOWERING 2 (MAF2);AGAMOUS-LIKE 31 (AGL31)	0.387738	5.88472	8.38075	0.00379216
AT5G51970	AT5G51970.1	Encodes a sorbitol dehydrogenase that exhibits greatest oxidative activity with sorbitol, ribitol and xylitol as substrates. SDH can be thiolated in vitro.	protein_coding	SORBITOL DEHYDROGENASE (ATSDH)	SORBITOL DEHYDROGENASE (ATSDH)	0.3878	7.11865	12.2608	0.000462561
AT5G48160	AT5G48160.1	Encodes a nuclear PHD finger protein that is functionally redundant with OBE1 and plays an important role in the maintenance and/or establishment of the root and shoot apical meristems.	protein_coding	OBERON2 (OBE2)	OBERON2 (OBE2)	0.387884	7.4954	8.22607	0.00412928
AT5G03730	AT5G03730.2	Homologous to the RAF family of serine/threonine protein kinases. Negative regulator in the ethylene signal transduction pathway. Interacts with the putative ethylene receptors ETR1 and ERS. Constitutively expressed.	protein_coding	CONSTITUTIVE TRIPLE RESPONSE 1 (CTR1)	CONSTITUTIVE TRIPLE RESPONSE 1 (CTR1); (AtCTR1);SUGAR-INSENSITIVE 1 (SIS1)	0.388991	6.49046	17.4408	2.96395e-05
AT5G23570	AT5G23570.1	Required for posttranscriptional gene silencing and natural virus resistance.SGS3 is a member of an 'unknown' protein family. Members of this family have predicted coiled coiled domains suggesting oligomerization and a potential zinc finger domain. Involved in the production of trans-acting siRNAs, through direct or indirect stabilization of cleavage fragments of the primary ta-siRNA transcript. …	protein_coding	SUPPRESSOR OF GENE SILENCING 3 (SGS3)	SUPPRESSOR OF GENE SILENCING 3 (ATSGS3);SUPPRESSOR OF GENE SILENCING 3 (SGS3)	0.38915	3.79327	9.69557	0.00184712
AT4G23510	AT4G23510.1	Disease resistance protein (TIR-NBS-LRR class) family;(source:Araport11)	protein_coding			0.38918	4.82484	9.56098	0.00198757
AT5G25475	AT5G25475.4	AP2/B3-like transcriptional factor family protein;(source:Araport11)	protein_coding			0.389514	3.49711	8.87166	0.00289631
AT1G62970	AT1G62970.1	SDJ3 functions partially redundantly with SDJ1 and SDJ2 and interacts with SUVH1 and SUVH3 to form a SUVH-SDJ complex. The complex binds promoters with DNA methylation and mediates transcriptional activation of promoter methylated genes.	protein_coding	SUVH1/3-INTERACTING DNAJ DOMAIN-CONTAINING PROTEIN 3 (SDJ3)	SUVH1/3-INTERACTING DNAJ DOMAIN-CONTAINING PROTEIN 3 (SDJ3)	0.390473	4.63459	12.1752	0.000484291
AT1G27750	AT1G27750.1	nucleic acid binding protein;(source:Araport11)	protein_coding			0.39081	5.03428	9.87217	0.00167797
AT1G14790	AT1G14790.1	Encodes RNA-dependent RNA polymerase. While not required for virus-induced post-transcriptional gene silencing (PTGS), it can promote turnover of viral RNAs in infected plants. Nomenclature according to Xie, et al. (2004). Involved in the production of Cucumber Mosaic Virus siRNAs.	protein_coding	RNA-DEPENDENT RNA POLYMERASE 1 (RDR1)	RNA-DEPENDENT RNA POLYMERASE 1 (RDR1); (ATRDR1); (ATRDRP1)	0.390857	4.25305	11.3804	0.000742246
AT5G35560	AT5G35560.1	DENN (AEX-3) domain-containing protein;(source:Araport11)	protein_coding			0.391183	5.87509	14.4906	0.000140858
AT3G27390	AT3G27390.1	transmembrane protein;(source:Araport11)	protein_coding			0.391319	6.63	18.979	1.32167e-05
AT1G72860	AT1G72860.1	NBS TIR LRR protein. It is induced in response to bacterial pathogens and overexpression results in cell death in leaves.	protein_coding	(TNL60)	(TNL60)	0.392136	3.94317	10.481	0.0012061
AT1G32090	AT1G32090.1	early-responsive to dehydration stress protein (ERD4);(source:Araport11)	protein_coding	(OSCA1.8)	(OSCA1.8)	0.392549	5.29826	11.2271	0.000806106
AT4G17220	AT4G17220.1	Encodes a microtubule associated protein (MAP70-5). Regulates secondary wall patterning in wood cells. Expressed in all tissues.	protein_coding	MICROTUBULE-ASSOCIATED PROTEINS 70-5 (MAP70-5)	MICROTUBULE-ASSOCIATED PROTEINS 70-5 (MAP70-5);MICROTUBULE-ASSOCIATED PROTEINS 70-5 (ATMAP70-5)	0.393165	4.4369	10.7222	0.00105858
AT1G22930	AT1G22930.1	T-complex protein 11;(source:Araport11)	protein_coding			0.393204	8.05901	17.7282	2.54826e-05
AT2G37130	AT2G37130.1	Peroxidase superfamily protein;(source:Araport11)	protein_coding			0.393228	9.69968	11.9409	0.000549147
AT4G33740	AT4G33740.1	myb-like protein X;(source:Araport11)	protein_coding			0.393976	6.09584	16.0759	6.08551e-05
AT1G80570	AT1G80570.2	RNI-like superfamily protein;(source:Araport11)	protein_coding			0.394843	4.3788	8.38565	0.00378194
AT4G29900	AT4G29900.1	one of the type IIB calcium pump isoforms. encodes an autoinhibited Ca(2+)-ATPase that contains an N-terminal calmodulin binding autoinhibitory domain.	protein_coding	AUTOINHIBITED CA(2+)-ATPASE 10 (ACA10)	AUTOINHIBITED CA(2+)-ATPASE 10 (ACA10); (ATACA10);COMPACT INFLORESCENCE 1 (CIF1)	0.394926	6.82162	15.788	7.08513e-05
AT2G18280	AT2G18280.1	Member of TLP family The mRNA is cell-to-cell mobile.	protein_coding	TUBBY LIKE PROTEIN 2 (TLP2)	TUBBY LIKE PROTEIN 2 (TLP2);TUBBY LIKE PROTEIN 2 (AtTLP2)	0.395247	7.6961	10.9653	0.000928323
AT5G58410	AT5G58410.1	HEAT/U-box domain-containing protein;(source:Araport11)	protein_coding			0.396678	6.20462	16.5435	4.75478e-05
AT5G54730	AT5G54730.1	yeast autophagy 18 F-like protein;(source:Araport11)	protein_coding	HOMOLOG OF YEAST AUTOPHAGY 18 (ATG18) F (G18F)	ARABIDOPSIS THALIANA HOMOLOG OF YEAST AUTOPHAGY 18 (ATG18) F (ATATG18F);HOMOLOG OF YEAST AUTOPHAGY 18 (ATG18) F (G18F);HOMOLOG OF YEAST AUTOPHAGY 18 (ATG18) F (ATG18F)	0.39698	5.34899	10.5517	0.00116084
AT5G54040	AT5G54040.1	Cysteine/Histidine-rich C1 domain family protein;(source:Araport11)	protein_coding			0.397014	5.78414	8.27876	0.00401116
AT4G01020	AT4G01020.1	helicase domain-containing protein / IBR domain-containing protein / zinc finger protein-like protein;(source:Araport11)	protein_coding			0.397077	4.09225	11.1451	0.000842526
AT2G38800	AT2G38800.1	Plant calmodulin-binding protein-like protein;(source:Araport11)	protein_coding			0.397438	8.70907	8.23714	0.00410417
AT5G18525	AT5G18525.1	Encodes a BEACH domain containing protein that is involved in targeting storage proteins to the protein storage vacuoles and effector triggered immunity to Psuedomonas syringae.	protein_coding	GREEN FLUORESCENT SEED 12 (GFS12)	GREEN FLUORESCENT SEED 12 (GFS12)	0.397928	5.61834	10.0367	0.00153453
AT1G34260	AT1G34260.1	Encodes a protein that is predicted to act as a phosphatidylinositol-3P 5-kinase, but, because it lacks a FYVE domain, it is unlikely to be efficiently targeted to membranes containing the porposed phosphatidylinositol-3P substrate. Therefore, its molecular function remains unknown. The mRNA is cell-to-cell mobile.	protein_coding	FORMS APLOID AND BINUCLEATE CELLS 1A (FAB1D)	FORMS APLOID AND BINUCLEATE CELLS 1A (FAB1D)	0.398914	4.39546	14.0286	0.000180055
AT4G39900	AT4G39900.1	adenine deaminase;(source:Araport11)	protein_coding			0.399235	4.55161	10.3574	0.00128957
AT1G27752	AT1G27752.1	Ubiquitin system component Cue protein;(source:Araport11)	protein_coding			0.399402	5.53182	14.1176	0.000171732
AT2G28780	AT2G28780.1	P-hydroxybenzoic acid efflux pump subunit;(source:Araport11)	protein_coding			0.39968	6.4186	9.63131	0.00191288
AT2G25590	AT2G25590.1	Plant Tudor-like protein;(source:Araport11)	protein_coding			0.400056	5.62189	8.20353	0.0041809
AT3G05900	AT3G05900.1	neurofilament protein-like protein;(source:Araport11)	protein_coding			0.400731	7.1755	14.1315	0.000170461
AT5G13690	AT5G13690.1	Encodes an enzyme that is predicted to act as an alpha-N-acetylglucosaminidase (NAGLU). An naglu mutant arrests early in seed development but does not appear to have male or female gametophytic defects. Transcript levels for this gene are increased during reproductive development.	protein_coding	CYCLOPS 1 (CYL1)	N-ACETYL-GLUCOSAMINIDASE (NAGLU);CYCLOPS 1 (CYL1)	0.401082	4.5434	16.3755	5.19537e-05
AT4G32850	AT4G32850.8	Encodes a nuclear poly(A) polymerase. Located in the nucleus. The mRNA is cell-to-cell mobile.	protein_coding	NUCLEAR POLY(A) POLYMERASE (nPAP)	POLY(A) POLYMERASE 4 (PAPS4);NUCLEAR POLY(A) POLYMERASE (nPAP)	0.401349	7.42635	15.0795	0.000103076
AT3G56410	AT3G56410.2	hypothetical protein (DUF3133);(source:Araport11)	protein_coding			0.401637	5.33456	10.9607	0.000930659
AT2G45920	AT2G45920.1	U-box domain-containing protein;(source:Araport11)	protein_coding			0.402571	5.77993	10.3641	0.00128491
AT4G30720	AT4G30720.1	Encodes a putative oxidoreductase/electron carrier detected in the chloroplast stroma that is essential to ensure a correct electron flow through the photosynthetic chain and, hence, photosynthesis efficiency and normal growth. Mutations in the Col-0 allele result in pale green pigmentation and defective growth.	protein_coding	PIGMENT DEFECTIVE 327 (PDE327)	PIGMENT DEFECTIVE 327 (PDE327)	0.403315	4.18076	12.2662	0.000461235
AT3G49590	AT3G49590.3	Autophagy protein.	protein_coding	AUTOPHAGY-RELATED 13A (ATG13a)	AUTOPHAGY-RELATED 13A (ATG13a)	0.403515	5.79254	10.8647	0.000980145
AT1G74090	AT1G74090.1	encodes a desulfoglucosinolate sulfotransferase, involved in the final step of glucosinolate core structure biosynthesis. Has a broad-substrate specificity with preference with methionine-derived desulfoglucosinolates.	protein_coding	DESULFO-GLUCOSINOLATE SULFOTRANSFERASE 18 (SOT18)	DESULFO-GLUCOSINOLATE SULFOTRANSFERASE 18 (SOT18);ARABIDOPSIS SULFOTRANSFERASE 5B (ATST5B);DESULFO-GLUCOSINOLATE SULFOTRANSFERASE 18 (ATSOT18)	0.404168	5.39583	11.665	0.000636867
AT5G14020	AT5G14020.1	Endosomal targeting BRO1-like domain-containing protein;(source:Araport11)	protein_coding			0.40453	4.35089	10.8046	0.00101247
AT2G30440	AT2G30440.1	Encodes a thylakoidal processing peptidase that removes signal sequences from proteins synthesized in the cytoplasm and transported into the thylakoid lumen. The mRNA is cell-to-cell mobile.	protein_coding	THYLAKOID PROCESSING PEPTIDE (TPP)	PLASTIDIC TYPE I SIGNAL PEPTIDASE 2B (PLSP2B);THYLAKOID PROCESSING PEPTIDE (TPP)	0.4057	7.73441	16.9775	3.7826e-05
AT5G60430	AT5G60430.1	antiporter/ drug transporter;(source:Araport11)	protein_coding			0.406376	4.29888	10.115	0.00147066
AT2G01190	AT2G01190.1	Octicosapeptide/Phox/Bem1p family protein;(source:Araport11)	protein_coding	PIGMENT DEFECTIVE 331 (PDE331)	PIGMENT DEFECTIVE 331 (PDE331)	0.406765	6.30186	8.15071	0.00430443
AT4G19700	AT4G19700.1	Encodes BOI (Botrytis Susceptible 1 Interactor). Has E3 ubiquitin ligase activity. Interacts with and ubiquitinates BOS1 (Botrytis Susceptible 1). It prevents caspase activation and attenuates cell death.	protein_coding	(RING)	(RING); (ATILP);IAP-LIKE PROTEIN (ILP);BOTRYTIS SUSCEPTIBLE1 INTERACTOR (BOI)	0.407292	4.35824	12.6833	0.000368935
AT2G30990	AT2G30990.1	arginine N-methyltransferase, putative (DUF688);(source:Araport11)	protein_coding			0.408291	4.2885	10.0634	0.00151244
AT1G48490	AT1G48490.1	Protein kinase which together with IREH1 plays an important role in controlling root skewing and maintaining the microtubule network.	protein_coding	INCOMPLETE ROOT HAIR ELONGATION 3 (IRE3)	INCOMPLETE ROOT HAIR ELONGATION 3 (IRE3)	0.408303	6.62337	21.7295	3.13925e-06
AT3G48190	AT3G48190.1	Encodes a homolog of the human ATM gene, which is mutated in ataxia telangiectasia, a chromosome instability disorder. Suppresses leaf senescence triggered by DNA double-strand break through epigenetic control of senescence-associated genes. Characterization of mutants suggest a role homologous recombination for DNA damage repair in response to ionizing radiation as well as during meiosis. The pr…	protein_coding	ATAXIA-TELANGIECTASIA MUTATED (ATM)	ATAXIA-TELANGIECTASIA MUTATED (ATM);PCD IN MALE GAMETOGENESIS 1 (PIG1);ARABIDOPSIS THALIANA ATAXIA-TELANGIECTASIA MUTATED (ATATM)	0.409158	4.98595	8.54938	0.00345641
AT4G36140	AT4G36140.1	disease resistance protein (TIR-NBS-LRR class);(source:Araport11)	protein_coding			0.409184	4.86637	14.456	0.000143472
AT5G58350	AT5G58350.1	Encodes a member of the WNK family (9 members in all) of protein kinases, the structural design of which is clearly distinct from those of other known protein kinases, such as receptor-like kinases and mitogen-activated protein kinases. Its transcription is under the control of circadian rhythms.	protein_coding	WITH NO LYSINE (K) KINASE 4 (WNK4)	(ZIK2);WITH NO LYSINE (K) KINASE 4 (WNK4)	0.410417	6.41768	17.1956	3.37221e-05
AT5G10370	AT5G10370.1	helicase domain-containing protein / IBR domain-containing protein / zinc finger protein-like protein;(source:Araport11)	protein_coding			0.410814	3.99102	13.545	0.000232914
AT5G63190	AT5G63190.1	Encodes a member of the MRF (MA3 DOMAIN-CONTAINING TRANSLATION REGULATORY FACTOR) gene family under TOR control that is transcriptionally induced by dark and starvation. MRF1 can be phosphorylated in vitro by S6K1 and S6K2.	protein_coding	MA3 DOMAIN-CONTAINING TRANSLATION REGULATORY FACTOR 1 (MRF1)	MA3 DOMAIN-CONTAINING TRANSLATION REGULATORY FACTOR 1 (MRF1)	0.410844	7.38336	16.2814	5.45965e-05
AT1G17145	AT1G17145.1	RING/U-box superfamily protein;(source:Araport11)	protein_coding			0.412092	4.59552	7.72153	0.00545661
AT1G48430	AT1G48430.1	Dihydroxyacetone kinase;(source:Araport11)	protein_coding			0.412393	5.7555	11.4155	0.000728345
AT2G22300	AT2G22300.1	Encodes a putative CAM binding transcription factor. Loss of function mutations show enhanced resistance to fungal and bacterial pathogens suggesting that CAMTA functions to suppress defense responses.It acts in the cold response pathway, it can bind to and activate the expression of DREB1 genes.	protein_coding	SIGNAL RESPONSIVE 1 (SR1)	SIGNAL RESPONSIVE 1 (SR1);CALMODULIN-BINDING TRANSCRIPTION ACTIVATOR 3 (CAMTA3)	0.413116	6.25403	13.5294	0.000234856
AT1G70980	AT1G70980.1	Class II aminoacyl-tRNA and biotin synthetases superfamily protein;(source:Araport11)	protein_coding	(SYNC3)	(SYNC3)	0.413301	5.47129	16.1595	5.82246e-05
AT1G05160	AT1G05160.1	Encodes an ent-kaurenoic acid hydroxylase, a member of the CYP88A cytochrome p450 family.	protein_coding	CYTOCHROME P450, FAMILY 88, SUBFAMILY A, POLYPEPTIDE 3 (CYP88A3)	CYTOCHROME P450, FAMILY 88, SUBFAMILY A, POLYPEPTIDE 3 (CYP88A3);ENT-KAURENOIC ACID OXYDASE 1 (KAO1); (ATKAO1)	0.413343	3.61774	10.0388	0.00153273
AT3G22370	AT3G22370.1	Encodes AOX1a, an isoform of alternative oxidase that is expressed in rosettes, flowers, and root. The alternative oxidase of plant mitochondria transfers electrons from the ubiquinone pool to oxygen without energy conservations. It is regulated through transcriptional control and by pyruvate. Plays a role in shoot acclimation to low temperature. Also is capable of ameliorating reactive oxygen sp…	protein_coding	ALTERNATIVE OXIDASE 1A (AOX1A)	ALTERNATIVE OXIDASE 1A (AOX1A); (AtHSR3);HYPER-SENSITIVITY-RELATED 3 (HSR3); (ATAOX1A)	0.414549	6.32992	15.2311	9.51252e-05
AT5G58540	AT5G58540.1	Protein kinase superfamily protein;(source:Araport11)	protein_coding			0.414772	5.66317	14.8542	0.000116151
AT5G06330	AT5G06330.1	Late embryogenesis abundant (LEA) hydroxyproline-rich glycoprotein family;(source:Araport11)	protein_coding			0.414825	4.59297	7.84345	0.00510051
AT4G12020	AT4G12020.2	Encodes a member of the A1 subgroup of the MEKK (MAPK/ERK kinase kinase) family. MEKK is another name for Mitogen-Activated Protein Kinase Kinase Kinase (MAPKKK or MAP3K). This subgroup has four members: At4g08500 (MEKK1, also known as ARAKIN, MAP3Kb1, MAPKKK8), At4g08480 (MEKK2, also known as MAP3Kb4, MAPKKK9), At4g08470 (MEKK3, also known as MAP3Kb3, MAPKKK10) and At4g12020 (MEKK4, also known a…	protein_coding	(WRKY19)	(WRKY19);MAPK/ERK KINASE KINASE 4 (MEKK4);MITOGEN-ACTIVATED PROTEIN KINASE KINASE KINASE 11 (MAPKKK11); (ATWRKY19)	0.415069	5.43333	16.805	4.14247e-05
AT4G32440	AT4G32440.2	Plant Tudor-like RNA-binding protein;(source:Araport11)	protein_coding			0.415521	5.34896	8.72179	0.00314429
AT1G77890	AT1G77890.1	One of a pair of paralogs (the other is AT4G08540)that is a subunit of the lass III phosphatidylinositol 3-kinase (PI3K) complex but is not essential for PI3P biosynthesis.	protein_coding	BECLIN 1-ASSOCIATED AUTOPHAGY-RELATED KEY REGULATOR 14A (ATG14A)	BECLIN 1-ASSOCIATED AUTOPHAGY-RELATED KEY REGULATOR 14A (ATG14A)	0.417459	3.65944	8.25733	0.00405877
AT5G13870	AT5G13870.1	EXGT-A4, endoxyloglucan transferase,	protein_coding	XYLOGLUCAN ENDOTRANSGLUCOSYLASE/HYDROLASE 5 (XTH5)	XYLOGLUCAN ENDOTRANSGLUCOSYLASE/HYDROLASE 5 (XTH5);ENDOXYLOGLUCAN TRANSFERASE A4 (EXGT-A4)	0.418533	4.11866	11.6537	0.000640752
AT5G66880	AT5G66880.1	encodes a member of SNF1-related protein kinases (SnRK2) whose activity is activated by ionic (salt) and non-ionic (mannitol) osmotic stress. Enzyme involved in the ABA signaling during seed germination, dormancy and seedling growth. The mRNA is cell-to-cell mobile.	protein_coding	SUCROSE NONFERMENTING 1(SNF1)-RELATED PROTEIN KINASE 2.3 (SNRK2.3)	SUCROSE NONFERMENTING 1 (SNF1)-RELATED PROTEIN KINASE 2-3 (SNRK2-3); (SRK2I);SUCROSE NONFERMENTING 1(SNF1)-RELATED PROTEIN KINASE 2.3 (SNRK2.3)	0.418868	5.62876	8.9997	0.00270024
AT2G38370	AT2G38370.1	weak chloroplast movement under blue light protein (DUF827);(source:Araport11)	protein_coding			0.419072	4.20802	11.2458	0.000798045
AT5G49890	AT5G49890.1	member of Anion channel protein family	protein_coding	CHLORIDE CHANNEL C (CLC-C)	(ATCLC-C);CHLORIDE CHANNEL C (CLC-C)	0.419643	5.75189	15.8362	6.90688e-05
AT1G12290	AT1G12290.1	NLR protein localized to plasma membrane. Overexpression triggers cell death. Has myristolation site at Gly2 which is required for membrane localization.	protein_coding	(L5)	(L5)	0.420665	3.63549	9.0043	0.00269345
AT1G15910	AT1G15910.1	Belongs to a subgroup of SGS3-like proteins that act redundantly in RNA-directed DNA methylation: AT1G15910 (FDM1), AT4G00380 (FDM2), AT3G12550 (FDM3), AT1G13790 (FDM4), AT1G80790 (FDM5).	protein_coding	FACTOR OF DNA METHYLATION 1 (FDM1)	FACTOR OF DNA METHYLATION 1 (FDM1);IDN2 PARALOG 1 (IDP1);INVOLVED IN DE NOVO 2 (IDN2) - LIKE 1 (IDNL1)	0.421121	5.05718	12.6521	0.000375145
AT2G17520	AT2G17520.1	Encodes a endoribonuclease/protein kinase IRE1-like protein that is predicted to form a type I transmembrane protein structure and contain kinase/endoribonuclease domains at their C-terminal halves. The transcript levels for several ER-stress responsive genes, including six protein disulfide isomerases (PDIs), BiP2, and AtbZIP60 are not affected in ire1-2 null mutants. The mRNA is cell-to-cell mo…	protein_coding	(IRE1A)	(ATIRE1A);INOSITOL REQUIRING 1-2 (IRE1-2);ARABIDOPSIS THALIANA INOSITOL REQUIRING 1-2 (ATIRE1-2); (IRE1A)	0.421259	6.40186	19.582	9.63707e-06
AT1G61180	AT1G61180.2	Coiled-coil nucleotide-binding leucine-rich-repeat protein involved in disease resistance.	protein_coding	(UNI)	(UNI)	0.421328	4.38437	8.90713	0.00284059
AT5G47020	AT5G47020.1	MraZ;(source:Araport11)	protein_coding			0.421647	6.30697	9.6287	0.0019156
AT1G23460	AT1G23460.1	Pectin lyase-like superfamily protein;(source:Araport11)	protein_coding			0.42227	4.29264	12.6207	0.000381494
AT1G13640	AT1G13640.1	Phosphatidylinositol 3- and 4-kinase family protein;(source:Araport11)	protein_coding			0.422382	6.30718	12.5453	0.000397212
AT3G60190	AT3G60190.1	At3g60190 encodes Arabidopsis dynamin-related protein 1E, DRP1E, also known as EDR3, ADL4 and ADL1E, which is 624 amino acid residues long, has a predicted mass of 69.8 kDa and a pI of 7.5. Dynamin-related protein 1E belongs to a plant-specific subclass of dynamin-related proteins (DRP1), consisting of five members in Arabidopsis (A, B, C, D, E). This class is characterized by having an N-termina…	protein_coding	DYNAMIN-LIKE 1E (DL1E)	DYNAMIN-LIKE 1E (ADL1E);DYNAMIN-LIKE 1E (DL1E);DYNAMIN-RELATED PROTEIN 1E (DRP1E);ARABIDOPSIS DYNAMIN-LIKE 4 (ADL4);DYNAMIN-LIKE PROTEIN 2 (ADLP2);ENHANCED DISEASE RESISTANCE 3 (EDR3)	0.422733	6.02195	8.80361	0.00300635
AT1G23830	AT1G23830.1	transmembrane protein;(source:Araport11)	protein_coding			0.424745	3.30559	8.14577	0.00431617
AT1G11720	AT1G11720.2	Encodes a starch synthase that in addition to its role in starch biosynthesis also has a negative regulatory function in the biosynthesis of transient starch. The protein apparently contains a starch-binding domain (SBD).	protein_coding	STARCH SYNTHASE 3 (SS3)	STARCH SYNTHASE 3 (SS3)	0.424879	3.23559	8.22319	0.00413585
AT1G56145	AT1G56145.2	Leucine-rich repeat transmembrane protein kinase;(source:Araport11)	protein_coding			0.425421	6.16118	13.3868	0.000253404
AT1G03080	AT1G03080.1	kinase interacting (KIP1-like) family protein;(source:Araport11)	protein_coding	NETWORKED 1D (NET1D)	NETWORKED 1D (NET1D)	0.425702	7.21486	19.4238	1.04692e-05
AT1G78895	AT1G78895.1	Reticulon family protein;(source:Araport11)	protein_coding			0.426233	4.14676	13.4728	0.000242052
AT2G07180	AT2G07180.1	Protein kinase superfamily protein;(source:Araport11)	protein_coding	PBS1-LIKE 17 (PBL17)	PBS1-LIKE 17 (PBL17)	0.426414	4.99525	14.436	0.000145005
AT1G50030	AT1G50030.1	Related to TOR proteins from yeast and mammals, regulators of cell growth in response to nutrient availability. TOR proteins belong to the family of phosphatidylinositol 3-kinase and are targets of the antiproliferative drug rapamycin. AtTOR binds the yeast FKBP12 protein in the presence of Rapamycin, is involved in embryogenesis and is expressed in embryos, endosperm and meristems. Participates …	protein_coding	TARGET OF RAPAMYCIN (TOR)	TARGET OF RAPAMYCIN (TOR)	0.426482	6.67764	13.7335	0.000210658
AT5G05460	AT5G05460.1	Encodes a cytosolic beta-endo-N-acetyglucosaminidase (ENGase). ENGases N-glycans cleave the O-glycosidic linkage between the two GlcNAc residues of the N-glycan core structure and thus generate a protein with a single GlcNAc attached to asparagine.	protein_coding	ENDO-BETA-N-ACETYGLUCOSAMINIDASE 85A (ENGase85A)	(AtENGase85A);ENDO-BETA-N-ACETYGLUCOSAMINIDASE 85A (ENGase85A)	0.427395	5.18426	13.4117	0.00025006
AT3G04060	AT3G04060.1	NAC046 is a member of the NAC domain containing family of transcription factors. It was identified in a screen for regulators of chlorophyll protein gene expression. Mutants in NAC046 have delayed senescence and increased CHL content suggesting a role in regulation of senescence and chlorophyll degradation.	protein_coding	NAC DOMAIN CONTAINING PROTEIN 46 (NAC046)	NAC DOMAIN CONTAINING PROTEIN 46 (NAC046);NAC DOMAIN CONTAINING PROTEIN 46 (anac046)	0.427705	5.31979	15.0511	0.000104639
AT1G76460	AT1G76460.1	RNA-binding (RRM/RBD/RNP motifs) family protein;(source:Araport11)	protein_coding			0.428082	6.02257	10.9067	0.000958152
AT5G56870	AT5G56870.1	beta-galactosidase 4;(source:Araport11)	protein_coding	BETA-GALACTOSIDASE 4 (BGAL4)	BETA-GALACTOSIDASE 4 (BGAL4)	0.429391	8.17498	14.9653	0.000109504
AT3G14415	AT3G14415.2	Encodes a glycolate oxidase that modulates reactive oxygen species-mediated signal transduction during nonhost resistance. The mRNA is cell-to-cell mobile.	protein_coding	GLYCOLATE OXIDASE 2 (GOX2)	GLYCOLATE OXIDASE 2 (GOX2)	0.429427	6.1411	15.1384	9.99109e-05
AT3G10660	AT3G10660.1	predicted to encode calcium-dependent protein kinase and is localized to the ER. Protein is myristoylated in a cell-free extract. Changing the proposed myristoylated site, G residue in the amino terminal, to A prevented the meristoylation . The G to A mutation decreased AtCPK2 membrane association by approximately 50%.	protein_coding	CALMODULIN-DOMAIN PROTEIN KINASE CDPK ISOFORM 2 (CPK2)	(ATCPK2);CALMODULIN-DOMAIN PROTEIN KINASE CDPK ISOFORM 2 (CPK2)	0.429467	4.65407	8.82868	0.00296532
AT2G22470	AT2G22470.1	Encodes arabinogalactan-protein (AGP2).	protein_coding	ARABINOGALACTAN PROTEIN 2 (AGP2)	(ATAGP2);ARABINOGALACTAN PROTEIN 2 (AGP2)	0.429572	7.03019	12.8698	0.000333929
AT3G26680	AT3G26680.1	involved in a SNM-dependent recombinational repair process of oxidatively induced DNA damage.	protein_coding	SENSITIVE TO NITROGEN MUSTARD 1 (SNM1)	SENSITIVE TO NITROGEN MUSTARD 1 (ATSNM1);SENSITIVE TO NITROGEN MUSTARD 1 (SNM1)	0.430271	4.15096	10.8636	0.000980746
AT5G45510	AT5G45510.1	Leucine-rich repeat (LRR) family protein;(source:Araport11)	protein_coding			0.431344	8.59418	14.7162	0.000124966
AT5G03340	AT5G03340.1	ATPase, AAA-type, CDC48 protein;(source:Araport11)	protein_coding	CELL DIVISION CYCLE 48C (ATCDC48C)	CELL DIVISION CYCLE 48C (ATCDC48C)	0.431807	6.1254	13.1713	0.000284276
AT1G06490	AT1G06490.1	Encodes Callose Synthase 7 (CalS7), a phloem-specific callose synthase responsible for callose deposition in developing sieve elements during phloem formation and in mature phloem induced by wounding.	protein_coding	CALLOSE SYNTHASE 7 (CalS7)	ARABIDOPSIS THALIANA GLUCAN SYNTHASE-LIKE 7 (ATGSL07); (gsl07);CALLOSE SYNTHASE 7 (CalS7);GLUCAN SYNTHASE-LIKE 7 (GSL07);GLUCAN SYNTHASE-LIKE 7 (GSL7); (atgsl7)	0.432362	3.83187	8.49633	0.00355864
AT3G62330	AT3G62330.1	Zinc knuckle (CCHC-type) family protein;(source:Araport11)	protein_coding			0.433406	5.07247	8.88381	0.0028771
AT1G70620	AT1G70620.3	cyclin-like protein;(source:Araport11)	protein_coding			0.433876	6.98431	15.9294	6.57489e-05
AT4G04970	AT4G04970.1	encodes a gene similar to callose synthase The mRNA is cell-to-cell mobile.	protein_coding	GLUCAN SYNTHASE-LIKE 1 (GSL1)	GLUCAN SYNTHASE LIKE-1 (ATGSL1);GLUCAN SYNTHASE-LIKE 1 (GSL1); (GSL01);GLUCAN SYNTHASE LIKE 1 (atgsl01)	0.435344	5.44982	17.2481	3.28029e-05
AT3G63310	AT3G63310.1	Mediates cell elongation in brassinosteroid signaling.	protein_coding	BRZ-INSENSITIVE-LONG HYPOCOTYLS 4 (BIL4)	BRZ-INSENSITIVE-LONG HYPOCOTYLS 4 (BIL4); (GAAP2); (ATLFG2);LIFEGUARD 2 (LFG2)	0.436034	6.5838	11.8292	0.000583081
AT5G45500	AT5G45500.1	RNI-like superfamily protein;(source:Araport11)	protein_coding			0.436578	6.76536	16.529	4.79112e-05
AT1G77500	AT1G77500.1	DUF630 family protein, putative (DUF630 and DUF632);(source:Araport11)	protein_coding			0.436602	4.99939	11.8595	0.000573685
AT1G09910	AT1G09910.1	Rhamnogalacturonate lyase family protein;(source:Araport11)	protein_coding			0.436627	4.4503	13.357	0.000257456
AT4G35240	AT4G35240.1	DNA-directed RNA polymerase subunit beta, putative (DUF630 and DUF632);(source:Araport11)	protein_coding			0.43664	4.1974	12.9217	0.000324803
AT5G04720	AT5G04720.1	Encodes a member of the ADR1 family nucleotide-binding leucine-rich repeat (NB-LRR) immune receptors. The mRNA is cell-to-cell mobile.	protein_coding	ADR1-LIKE 2 (ADR1-L2)	PHOENIX 21 (PHX21);ADR1-LIKE 2 (ADR1-L2)	0.43743	6.19485	8.85935	0.00291591
AT2G17550	AT2G17550.1	RB1-inducible coiled-coil protein;(source:Araport11)	protein_coding	TON1 RECRUITING MOTIF 26 (TRM26)	TON1 RECRUITING MOTIF 26 (TRM26)	0.437639	4.16273	12.7404	0.000357832
AT1G07000	AT1G07000.1	A member of EXO70 gene family, putative exocyst subunits, conserved in land plants. Arabidopsis thaliana contains 23 putative EXO70 genes, which can be classified into eight clusters on the phylogenetic tree.	protein_coding	EXOCYST SUBUNIT EXO70 FAMILY PROTEIN B2 (EXO70B2)	EXOCYST SUBUNIT EXO70 FAMILY PROTEIN B2 (EXO70B2);EXOCYST SUBUNIT EXO70 FAMILY PROTEIN B2 (ATEXO70B2)	0.438777	4.84081	12.7498	0.000356046
AT5G51630	AT5G51630.1	Disease resistance protein (TIR-NBS-LRR class) family;(source:Araport11)	protein_coding			0.438919	5.4267	11.5529	0.000676434
AT1G50480	AT1G50480.1	10-formyltetrahydrofolate synthetase (THFS) mRNA, complete The mRNA is cell-to-cell mobile.	protein_coding	10-FORMYLTETRAHYDROFOLATE SYNTHETASE (THFS)	10-FORMYLTETRAHYDROFOLATE SYNTHETASE (THFS)	0.439137	7.77809	21.5577	3.43349e-06
AT1G13970	AT1G13970.1	beta-hexosaminidase (DUF1336);(source:Araport11)	protein_coding			0.43918	4.13736	10.5777	0.00114462
AT5G02480	AT5G02480.1	HSP20-like chaperones superfamily protein;(source:Araport11)	protein_coding			0.439301	6.91295	15.3363	8.99689e-05
AT5G63800	AT5G63800.1	Involved in mucilage formation. Mutants form columella and outer cell wall architecture of the mucilage cells resembles wild-type. However, mum2 seeds completely lack seed coat mucilage. This mutation appears to represent a later step in the development of this cell-type. Encodes a beta-galactosidase involved in seed coat mucilage biosynthesis. Member of Glycoside Hydrolase Family 35	protein_coding	MUCILAGE-MODIFIED 2 (MUM2)	BETA-GALACTOSIDASE 6 (BGAL6);MUCILAGE-MODIFIED 2 (MUM2)	0.439515	5.43987	9.42738	0.00213769
AT3G47210	AT3G47210.1	hypothetical protein (DUF247);(source:Araport11)	protein_coding			0.440205	4.59701	11.2975	0.000776115
AT5G23080	AT5G23080.1	Interacts with TATA-box binding protein 2. Contains domains with strong similarity to G-patch and SWAP domains, characteristic of RNA binding and processing proteins. Colocalizes with the splicing regulator SRp34 to subnuclear particles. It is an important component of miRNA and siRNA biogenesis. Mutants display developmental defects, including reduced plant height, polycotyly, and reduced vascul…	protein_coding	TOUGH (TGH)	TOUGH (TGH)	0.441296	5.17612	16.8511	4.04308e-05
AT5G03670	AT5G03670.1	histone-lysine N-methyltransferase SETD1B-like protein;(source:Araport11)	protein_coding	TON1 RECRUITING MOTIF 28 (TRM28)	TON1 RECRUITING MOTIF 28 (TRM28)	0.441824	3.7039	8.04284	0.00456837
AT1G28290	AT1G28290.1	Encodes an atypical arabinogalactan protein that is localized to the plasma membrange. AGP31 is highly expressed in flowers and vascular tissue and is repressed by jasmonic acid. AGP31 may play a role in vascular tissue function during defense and development.	protein_coding	ARABINOGALACTAN PROTEIN 31 (AGP31)	ARABINOGALACTAN PROTEIN 31 (AGP31)	0.441874	9.56579	15.2931	9.20516e-05
AT4G30280	AT4G30280.1	Encodes a xyloglucan endotransglucosylase/hydrolase with only only the endotransglucosylase (XET; EC 2.4.1.207) activity towards xyloglucan and non-detectable endohydrolytic (XEH; EC 3.2.1.151) activity. Expressed in the mature or basal regions of both the main and lateral roots, but not in the tip of these roots where cell division occurs.	protein_coding	XYLOGLUCAN ENDOTRANSGLUCOSYLASE/HYDROLASE 18 (XTH18)	XYLOGLUCAN ENDOTRANSGLUCOSYLASE/HYDROLASE 18 (XTH18);XYLOGLUCAN ENDOTRANSGLUCOSYLASE/HYDROLASE 18 (ATXTH18)	0.442482	5.47958	8.53537	0.0034831
AT1G05570	AT1G05570.1	Encodes a callose synthase 1 catalytic subunit . Member of Glycosyltransferase Family- 48.	protein_coding	CALLOSE SYNTHASE 1 (CALS1)	GLUCAN SYNTHASE-LIKE 6 (GSL6); (ATGSL06); (GSL06); (ATGSL6);CALLOSE SYNTHASE 1 (CALS1)	0.442555	7.97386	13.1293	0.000290707
AT2G01520	AT2G01520.1	Encodes a cis-cinnamic acid responsive gene that is a member of the major latex protein-like gene family and plays a role in promoting vegetative growth and delaying &#64258;owering. The mRNA is cell-to-cell mobile.	protein_coding	MLP-LIKE PROTEIN 328 (MLP328)	(ZUSAMMEN-CA)-ENHANCED 1 (ZCE1);MLP-LIKE PROTEIN 328 (MLP328)	0.44295	10.2969	13.1237	0.000291578
AT5G10720	AT5G10720.1	member of Histidine Kinase	protein_coding	HISTIDINE KINASE 5 (HK5)	CYTOKININ INDEPENDENT 2 (CKI2);HISTIDINE KINASE 5 (AHK5);HISTIDINE KINASE 5 (HK5)	0.444132	4.46304	12.1351	0.00049481
AT2G19570	AT2G19570.1	Encodes a cytidine deaminase that deaminates cytidine and deoxycytidine and is competitively inhibited by cytosine-containing compounds.	protein_coding	CYTIDINE DEAMINASE 1 (CDA1)	CYTIDINE DEAMINASE 1 (CDA1); (DESZ); (AT-CDA1)	0.444897	5.91301	16.6707	4.44631e-05
AT3G47950	AT3G47950.1	mutant has Slight reduction in root and shoot growth; Exaggerated defects in salt stress; Plasma Membrane H+ ATPase	protein_coding	H(+)-ATPASE 4 (HA4)	H(+)-ATPASE 4 (AHA4);H(+)-ATPASE 4 (HA4)	0.444988	3.90223	10.5935	0.00113486
AT1G71695	AT1G71695.1	Peroxidase superfamily protein;(source:Araport11)	protein_coding			0.445262	4.49478	10.1994	0.00140489
AT1G79430	AT1G79430.2	Encodes gene product that is required for several aspects of phloem development in the root: (1) the specific divisions organizing the phloem pole, (2) sieve element differentiation and (3) the expression of a companion-specific gene. Mutant has a defect in the organization of phloem poles in the root. apl seedlings have a short, determinate root with only occasional lateral branches.	protein_coding	ALTERED PHLOEM DEVELOPMENT (APL)	ALTERED PHLOEM DEVELOPMENT (APL);WOODY (WDY)	0.445373	4.41856	9.763	0.00178059
AT3G04720	AT3G04720.1	Encodes a protein similar to the antifungal chitin-binding protein hevein from rubber tree latex. mRNA levels increase in response to ethylene and turnip crinkle virus infection. The mRNA is cell-to-cell mobile.	protein_coding	PATHOGENESIS-RELATED 4 (PR4)	PATHOGENESIS-RELATED 4 (PR4); (ATPR4); (PR-4);HEVEIN-LIKE (HEL)	0.44552	7.65953	10.6281	0.00111384
AT1G18030	AT1G18030.1	Protein phosphatase 2C family protein;(source:Araport11)	protein_coding			0.446005	3.79	13.1092	0.000293856
AT1G76520	AT1G76520.1	Auxin efflux carrier family protein;(source:Araport11)	protein_coding	PIN-LIKES 3 (PILS3)	PIN-LIKES 3 (PILS3)	0.446214	6.08868	10.6116	0.0011238
AT5G51550	AT5G51550.1	EXORDIUM like 3;(source:Araport11)	protein_coding	EXORDIUM LIKE 3 (EXL3)	EXORDIUM LIKE 3 (EXL3)	0.446233	5.79177	10.1156	0.00147019
AT5G40470	AT5G40470.1	RNI-like superfamily protein;(source:Araport11)	protein_coding			0.44688	3.91669	8.23062	0.00411895
AT4G30350	AT4G30350.1	Encodes a member of an eight-gene family (SMAX1 and SMAX1-like) that has weak similarity to AtHSP101, a ClpB chaperonin required for thermotolerance. Regulates root and root hair development downstream of KAI2-mediated signaling.	protein_coding	SMAX1-LIKE 2 (SMXL2)	SMAX1-LIKE 2 (SMXL2)	0.447053	5.48701	16.8998	3.94058e-05
AT1G61590	AT1G61590.1	Protein kinase superfamily protein;(source:Araport11)	protein_coding	PBS1-LIKE 15 (PBL15)	SCHENGEN1 (SGN1);PBS1-LIKE 15 (PBL15)	0.447153	6.25649	16.5304	4.78762e-05
AT5G41260	AT5G41260.1	kinase with tetratricopeptide repeat domain-containing protein;(source:Araport11)	protein_coding	BRASSINOSTEROID-SIGNALING KINASE 8 (BSK8)	BRASSINOSTEROID-SIGNALING KINASE 8 (BSK8)	0.448309	5.85076	17.1105	3.52673e-05
AT5G06560	AT5G06560.1	myosin-binding protein (Protein of unknown function, DUF593);(source:Araport11)	protein_coding	(MYOB7)	(MYOB7)	0.449472	5.5409	10.6821	0.00108176
AT5G55600	AT5G55600.1	Agenet and bromo-adjacent homology (BAH) domain-containing protein;(source:Araport11)	protein_coding			0.449939	6.04645	19.5771	9.66196e-06
AT4G40090	AT4G40090.1	arabinogalactan protein 3;(source:Araport11)	protein_coding	ARABINOGALACTAN PROTEIN 3 (AGP3)	ARABINOGALACTAN PROTEIN 3 (AGP3)	0.45074	5.04755	12.7228	0.000361231
AT4G36050	AT4G36050.2	Encodes a base excision repair protein with 3'-phosphatase activity and strong 3'-5' exonuclease activity. Together with ZDP, it plays overlapping roles in the maintenance of epigenome and genome stability in plants.	protein_coding	APURINIC/APYRIMIDINIC ENDONUCLEASE2 (APE2)	APURINIC/APYRIMIDINIC ENDONUCLEASE2 (APE2)	0.451219	4.08536	9.02433	0.0026641
AT5G47560	AT5G47560.1	Encodes a tonoplast malate/fumarate transporter.	protein_coding	TONOPLAST DICARBOXYLATE TRANSPORTER (TDT)	TONOPLAST DICARBOXYLATE TRANSPORTER (ATTDT);TONOPLAST DICARBOXYLATE TRANSPORTER (TDT); (ATSDAT)	0.451648	6.70889	17.5907	2.7392e-05
AT3G52250	AT3G52250.1	Encodes a protein with a putative role in mRNA splicing. The mRNA is cell-to-cell mobile.	protein_coding	POWERDRESS (PWR)	POWERDRESS (PWR)	0.452154	6.30257	21.6865	3.21037e-06
AT5G16630	AT5G16630.1	DNA repair protein Rad4 family;(source:Araport11)	protein_coding	(RAD4)	(RAD4); (ATRAD4)	0.452344	4.5962	15.8814	6.74399e-05
AT5G48770	AT5G48770.1	Disease resistance protein (TIR-NBS-LRR class) family;(source:Araport11)	protein_coding			0.453007	3.63029	7.95132	0.00480524
AT5G10600	AT5G10600.1	member of CYP81K	protein_coding	CYTOCHROME P450, FAMILY 81, SUBFAMILY K, POLYPEPTIDE 2 (CYP81K2)	CYTOCHROME P450, FAMILY 81, SUBFAMILY K, POLYPEPTIDE 2 (CYP81K2)	0.453765	3.0317	7.98914	0.00470588
AT1G50460	AT1G50460.1	Involved in glucose-ethylene crosstalk.	protein_coding	HEXOKINASE-LIKE 1 (HKL1)	(ATHKL1);HEXOKINASE-LIKE 1 (HKL1)	0.453806	4.9636	17.9162	2.30849e-05
AT3G15070	AT3G15070.1	Encodes a RING-type E3 ligase that positively regulates CIN-like TCP activity to promote leaf development by mediating the degradation of the TCP repressor TIE1.	protein_coding	TIE1-ASSOCIATED 33 RING-TYPE E3 LIGASE 2 (TEAR2)	(CTL02);TIE1-ASSOCIATED 33 RING-TYPE E3 LIGASE 2 (TEAR2)	0.453867	5.04103	14.8361	0.000117271
AT1G10020	AT1G10020.1	formin-like protein (DUF1005);(source:Araport11)	protein_coding			0.454308	4.65306	20.9188	4.79158e-06
AT5G01240	AT5G01240.1	Encodes LAX1 (LIKE AUXIN RESISTANT), a member of the AUX1 LAX family of auxin influx carriers. Required for the establishment of embryonic root cell organization.	protein_coding	LIKE AUXIN RESISTANT 1 (LAX1)	LIKE AUXIN RESISTANT 1 (LAX1)	0.454661	5.28866	9.44721	0.00211471
AT2G15900	AT2G15900.1	Encodes a member of the Arabidopsis sorting nexin family.	protein_coding	SORTING NEXIN 4 (SNX4)	SORTING NEXIN 4 (SNX4)	0.45542	5.60654	14.9388	0.000111057
AT4G02020	AT4G02020.1	Encodes a polycomb group protein. Forms part of a large protein complex that can include VRN2 (VERNALIZATION 2), VIN3 (VERNALIZATION INSENSITIVE 3) and polycomb group proteins FERTILIZATION INDEPENDENT ENDOSPERM (FIE) and CURLY LEAF (CLF). The complex has a role in establishing FLC (FLOWERING LOCUS C) repression during vernalization. Performs a partially redundant role to MEA in controlling seed …	protein_coding	SWINGER (SWN)	(EZA1);SET DOMAIN-CONTAINING PROTEIN 10 (SDG10);SWINGER (SWN)	0.456294	6.06756	17.0992	3.5478e-05
AT1G20620	AT1G20620.1	Catalase, catalyzes the breakdown of hydrogen peroxide (H2O2) into water and oxygen. The mRNA is cell-to-cell mobile.	protein_coding	CATALASE 3 (CAT3)	SENESCENCE 2 (SEN2); (ATCAT3);CATALASE 3 (CAT3);REPRESSOR OF GSNOR1 (ROG1)	0.457677	9.82735	10.0098	0.00155708
AT4G17370	AT4G17370.1	Oxidoreductase family protein;(source:Araport11)	protein_coding			0.458115	4.5622	11.314	0.000769254
AT4G16957	AT4G16957.1	SUPPRESSOR OF, CONSTITUTIVE protein;(source:Araport11)	protein_coding			0.459502	3.82673	11.5299	0.000684844
AT1G27170	AT1G27170.1	transmembrane receptors / ATP binding protein;(source:Araport11)	protein_coding			0.459723	4.72448	9.69315	0.00184956
AT3G26440	AT3G26440.1	transmembrane protein, putative (DUF707);(source:Araport11)	protein_coding			0.460752	6.89217	12.4914	0.000408827
AT1G55510	AT1G55510.1	branched-chain alpha-keto acid decarboxylase E1 beta	protein_coding	BRANCHED-CHAIN ALPHA-KETO ACID DECARBOXYLASE E1 BETA SUBUNIT (BCDH BETA1)	BRANCHED-CHAIN ALPHA-KETO ACID DECARBOXYLASE E1 BETA SUBUNIT (BCDH BETA1)	0.461317	4.79861	8.52675	0.00349965
AT2G42270	AT2G42270.1	Similar to yeast Brr2p DEAD/DExH box ATP-dependent RNA helicase.	protein_coding	(BRR2B)	(BRR2B)	0.461615	5.74098	9.41901	0.00214748
AT3G26890	AT3G26890.1	meiosis chromosome segregation family protein;(source:Araport11)	protein_coding			0.46371	6.44132	9.75237	0.00179092
AT4G24690	AT4G24690.1	Encodes NBR1, a selective autophagy substrate. The mRNA is cell-to-cell mobile.	protein_coding	NEXT TO BRCA1 GENE 1 (NBR1)	ARABIDOPSIS THALIANA NEXT TO BRCA1 GENE 1 (AtNBR1);NEXT TO BRCA1 GENE 1 (NBR1)	0.464037	8.8239	14.4478	0.000144096
AT1G34670	AT1G34670.1	Encodes a member of the R2R3 transcription factor gene family that is a negative regulator of lateral root (LR) development. It has been proposed that this transcription factor is part of a novel negative feedback loop stimulated specifically in the endodermis upon LR initiation to ensure that LRs are formed only in the correct place.	protein_coding	MYB DOMAIN PROTEIN 93 (MYB93)	MYB DOMAIN PROTEIN 93 (MYB93);MYB DOMAIN PROTEIN 93 (AtMYB93)	0.464792	4.59972	9.18704	0.00243734
AT1G08930	AT1G08930.1	encodes a putative sucrose transporter whose gene expression is induced by dehydration and cold. The mRNA is cell-to-cell mobile.	protein_coding	EARLY RESPONSE TO DEHYDRATION 6 (ERD6)	EARLY RESPONSE TO DEHYDRATION 6 (ERD6)	0.465106	7.74867	11.2712	0.000787177
AT5G65530	AT5G65530.1	Encodes a protein kinase involved in mediating resistance to fungi and also trichome branch number. Kinase activity is increased by ROP6 which also affects its sub-cellular localization (becomes localized to the cell periphery_	protein_coding	ARABIDOPSIS RECEPTOR-LIKE CYTOPLASMIC KINASE ATRLCK VI_A3 (ATRLCK VI_A3)	ARABIDOPSIS RECEPTOR-LIKE CYTOPLASMIC KINASE ATRLCK VI_A3 (ATRLCK VI_A3)	0.466068	4.99201	12.4899	0.00040916
AT5G44610	AT5G44610.1	Encodes a protein with seven repeated VEEKK motifs. RNAi and overexpression experiments suggest that the gene is not involved in cell division but might be consequential for cell shape of epidermal and cortical cells. The protein encoded by this gene binds to cortical microtubules and inhibits tubulin polymerization. Associates to the plasma membrane and interacts with calmodulin and phosphatidyl…	protein_coding	MICROTUBULE-ASSOCIATED PROTEIN 18 (MAP18)	PLASMA MEMBRANE ASSOCIATED CA2+-BINDING PROTEIN-2 (PCAP2);MICROTUBULE-ASSOCIATED PROTEIN 18 (MAP18)	0.466104	7.38665	18.0518	2.14974e-05
AT4G24020	AT4G24020.1	Encodes NIN Like Protein 7 (NLP7). Modulates nitrate sensing and metabolism. Mutants of NLP7 show features of nitrogen-starved plants and are tolerant to drought stress. Localized in the nucleus and functions as a putative transcription factor. The mRNA is cell-to-cell mobile.	protein_coding	NIN LIKE PROTEIN 7 (NLP7)	NIN LIKE PROTEIN 7 (NLP7)	0.467496	6.64974	22.9744	1.64172e-06
AT1G08800	AT1G08800.1	myosin-binding protein (Protein of unknown function, DUF593);(source:Araport11)	protein_coding	MYOSIN BINDING PROTEIN 1 (MYOB1)	MYOSIN BINDING PROTEIN 1 (MYOB1)	0.467654	5.9681	28.8279	7.91045e-08
AT4G11850	AT4G11850.1	Encodes a phospholipase D (gamma) that is involved in aluminum tolerance and plays a role in membrane lipid modulation under Al stress.	protein_coding	PHOSPHOLIPASE D GAMMA 1 (PLDGAMMA1)	MATERNAL EFFECT EMBRYO ARREST 54 (MEE54);PHOSPHOLIPASE D GAMMA 1 (PLDGAMMA1)	0.468006	6.48476	12.7303	0.000359778
AT5G08240	AT5G08240.1	transmembrane protein;(source:Araport11)	protein_coding			0.46811	6.31792	9.49251	0.00206312
AT4G39420	AT4G39420.2	spatacsin carboxy-terminus protein;(source:Araport11)	protein_coding			0.468541	5.83399	15.4866	8.30936e-05
AT1G33050	AT1G33050.1	hypothetical protein;(source:Araport11)	protein_coding			0.468815	6.81777	10.6463	0.00110294
AT1G01770	AT1G01770.1	propionyl-CoA carboxylase;(source:Araport11)	protein_coding			0.470018	4.9301	11.4766	0.000704789
AT1G76820	AT1G76820.1	eukaryotic translation initiation factor 2 (eIF-2) family protein;(source:Araport11)	protein_coding			0.47021	2.95875	7.85985	0.00505446
AT5G02880	AT5G02880.1	encodes a ubiquitin-protein ligase containing a HECT domain. There are six other HECT-domain UPLs in Arabidopsis. The mRNA is cell-to-cell mobile.	protein_coding	UBIQUITIN-PROTEIN LIGASE 4 (UPL4)	UBIQUITIN-PROTEIN LIGASE 4 (UPL4)	0.470614	6.9361	27.9285	1.2588e-07
AT4G16260	AT4G16260.1	Encodes a putative beta-1,3-endoglucanase that interacts with the 30C02 cyst nematode effector. May play a role in host defense.	protein_coding			0.471559	7.84575	16.0275	6.24276e-05
AT5G44510	AT5G44510.1	Encodes TAO1 (Target of AvrB Operation), a TIR-NB-LRR protein that contributes to disease resistance induced by the Pseudomonas syringae effector AvrB.	protein_coding	TARGET OF AVRB OPERATION1 (TAO1)	TARGET OF AVRB OPERATION1 (TAO1)	0.471645	4.70617	17.8299	2.41558e-05
AT5G40100	AT5G40100.1	Disease resistance protein (TIR-NBS-LRR class) family;(source:Araport11)	protein_coding			0.472246	3.80764	10.1925	0.00141011
AT5G54080	AT5G54080.1	Encodes a homogentisate 1,2-dioxygenase that can convert homogentisate to malylacetoacetate and is likely to be involved in tyrosine catabolism.	protein_coding	HOMOGENTISATE 1,2-DIOXYGENASE (HGO)	(ATHGO);HOMOGENTISATE 1,2-DIOXYGENASE (HGO)	0.472265	6.06072	10.6277	0.00111408
AT3G24480	AT3G24480.1	Leucine-rich repeat (LRR) family protein;(source:Araport11)	protein_coding	LEUCINE-RICH REPEAT EXTENSIN 4 (LRX4)	LEUCINE-RICH REPEAT EXTENSIN 4 (LRX4)	0.472402	6.84858	14.5506	0.000136442
AT3G43190	AT3G43190.1	Encodes a protein with sucrose synthase activity (SUS4).	protein_coding	SUCROSE SYNTHASE 4 (SUS4)	ARABIDOPSIS THALIANA SUCROSE SYNTHASE 4 (ATSUS4);SUCROSE SYNTHASE 4 (SUS4)	0.473197	3.45834	8.61522	0.00333365
AT1G31350	AT1G31350.1	KAR-UP F-box 1;(source:Araport11)	protein_coding	KAR-UP F-BOX 1 (KUF1)	KAR-UP F-BOX 1 (KUF1)	0.474762	4.46564	8.73295	0.00312511
AT5G45250	AT5G45250.1	RPS4 belongs to the Toll/interleukin-1 receptor (TIR)-nucleotide binding site (NBS)-Leu-rich repeat (LRR) class of disease resistance (R ) genes. Confers specific resistance to Pseudomonas syringae pv. tomato carrying the avirulence gene AvrRPS4. Produces alternative transcripts with truncated open reading frames.	protein_coding	RESISTANT TO P. SYRINGAE 4 (RPS4)	RESISTANT TO P. SYRINGAE 4 (RPS4)	0.474794	4.43091	17.1253	3.49935e-05
AT3G02260	AT3G02260.1	Calossin-like protein required for polar auxin transport. Involved in regulating sugar response and C/N balance.	protein_coding	BIG (BIG)	TRANSPORT INHIBITOR RESPONSE 3 (TIR3);UMBRELLA 1 (UMB1);ATTENUATED SHADE AVOIDANCE 1 (ASA1);DARK OVER-EXPRESSION OF CAB 1 (DOC1);CORYMBOSA1 (CRM1);BIG (BIG);LOW PHOSPHATE-RESISTANT ROOT 1 (LPR1)	0.475206	7.73353	13.2517	0.000272328
AT4G04960	AT4G04960.1	Concanavalin A-like lectin protein kinase family protein;(source:Araport11)	protein_coding	L-TYPE LECTIN RECEPTOR KINASE VII.1 (LECRK-VII.1)	L-TYPE LECTIN RECEPTOR KINASE VII.1 (LECRK-VII.1)	0.476009	5.27933	11.4982	0.00069664
AT5G02350	AT5G02350.1	Cysteine/Histidine-rich C1 domain family protein;(source:Araport11)	protein_coding			0.476771	3.23808	8.31187	0.00393869
AT2G28970	AT2G28970.1	Leucine-rich repeat protein kinase family protein;(source:Araport11)	protein_coding			0.477263	4.47139	11.4616	0.000710499
AT4G20880	AT4G20880.1	ethylene-responsive nuclear protein / ethylene-regulated nuclear protein (ERT2);(source:Araport11)	protein_coding			0.477345	4.50884	9.39523	0.00217551
AT2G30550	AT2G30550.2	Encodes a lipase that hydrolyzes phosphatidylcholine, glycolipids as well as triacylglycerols.	protein_coding	DAD1-LIKE LIPASE 3 (DALL3)	DAD1-LIKE LIPASE 3 (DALL3)	0.477375	4.32302	12.8149	0.00034387
AT1G30410	AT1G30410.1	member of MRP subfamily	protein_coding	ATP-BINDING CASSETTE C12 (ABCC12)	MULTIDRUG RESISTANCE-ASSOCIATED PROTEIN 13 (ATMRP13);ATP-BINDING CASSETTE C12 (ABCC12);MULTIDRUG RESISTANCE-ASSOCIATED PROTEIN 13 (MRP13)	0.4775	4.99987	17.0215	3.69592e-05
AT1G27920	AT1G27920.1	microtubule-associated protein 65-8;(source:Araport11)	protein_coding	MICROTUBULE-ASSOCIATED PROTEIN 65-8 (MAP65-8)	MICROTUBULE-ASSOCIATED PROTEIN 65-8 (MAP65-8)	0.477531	5.58195	11.2489	0.000796708
AT2G46740	AT2G46740.1	Encodes a homolog of rat L-gulono-1,4-lactone (L-GulL) oxidase that is involved in the biosynthesis of L-ascorbic acid.	protein_coding	L -GULONO-1,4-LACTONE ( L -GULL) OXIDASE 5 (GULLO5)	(ATGULLO5);L -GULONO-1,4-LACTONE ( L -GULL) OXIDASE 5 (GULLO5)	0.479351	5.60455	12.056	0.000516255
AT5G04020	AT5G04020.1	calmodulin binding protein;(source:Araport11)	protein_coding			0.479505	4.60641	15.2348	9.494e-05
AT5G25820	AT5G25820.1	Exostosin family protein;(source:Araport11)	protein_coding			0.481904	5.24867	19.6428	9.33529e-06
AT4G21534	AT4G21534.1	Diacylglycerol kinase family protein;(source:Araport11)	protein_coding	SPHINGOSINE KINASE 2 (SPHK2)	SPHINGOSINE KINASE 2 (SPHK2)	0.482891	4.88604	18.0593	2.14126e-05
AT5G15270	AT5G15270.2	RNA-binding KH domain-containing protein;(source:Araport11)	protein_coding			0.483021	5.61523	18.1791	2.01074e-05
AT3G14205	AT3G14205.1	Phosphoinositide phosphatase family protein;(source:Araport11)	protein_coding	SUPPRESSOR OF ACTIN 2 (SAC2)	SUPPRESSOR OF ACTIN 2 (SAC2)	0.483778	5.62211	21.9147	2.85038e-06
AT1G68580	AT1G68580.2	Agenet and bromo-adjacent homology (BAH) domain-containing protein;(source:Araport11)	protein_coding			0.485389	6.03047	17.0167	3.70533e-05
AT1G30420	AT1G30420.1	member of MRP subfamily	protein_coding	ATP-BINDING CASSETTE C11 (ABCC11)	MULTIDRUG RESISTANCE-ASSOCIATED PROTEIN 12 (ATMRP12);MULTIDRUG RESISTANCE-ASSOCIATED PROTEIN 12 (MRP12);ATP-BINDING CASSETTE C11 (ABCC11)	0.486069	5.00799	18.3198	1.86758e-05
AT3G62770	AT3G62770.1	Required for autophagosome formation during nutrient deprivation and senescence, promotes pexophagy during seedling development.	protein_coding	AUTOPHAGY 18A (ATG18a)	AUTOPHAGY 18A (AtATG18a);PEROXISOME UNUSUAL POSITIONING 2 (PEUP2);AUTOPHAGY 18A (ATG18a)	0.486228	6.04403	14.7204	0.000124689
AT3G09020	AT3G09020.1	alpha 1,4-glycosyltransferase family protein;(source:Araport11)	protein_coding			0.486391	4.52645	9.46187	0.00209787
AT5G52440	AT5G52440.1	HCF106; nuclear gene for chloroplast. Thylakoid membrane delta pH translocation pathway component protein; related to Escherichia coli TatA and TatB The mRNA is cell-to-cell mobile.	protein_coding	HIGH CHLOROPHYLL FLUORESCENCE 106 (HCF106)	HIGH CHLOROPHYLL FLUORESCENCE 106 (HCF106)	0.486506	4.25658	12.295	0.000454168
AT5G45480	AT5G45480.1	transmembrane protein, putative (DUF594);(source:Araport11)	protein_coding			0.48663	6.05062	18.067	2.13263e-05
AT5G25560	AT5G25560.2	CHY-type/CTCHY-type/RING-type Zinc finger protein;(source:Araport11)	protein_coding			0.486664	7.39671	13.7881	0.000204631
AT5G38150	AT5G38150.1	Involved in chloroplast avoidance movement under high-light intensities	protein_coding	PLASTID MOVEMENT IMPAIRED 15 (PMI15)	PLASTID MOVEMENT IMPAIRED 15 (PMI15)	0.488696	3.73562	15.5183	8.17122e-05
AT2G28290	AT2G28290.1	Encodes a SWI2/SNF2-like protein in the SNF2 subclass. Homozygous plants with null mutations exhibit premature termination of the meristem and carpelloid structures from the inflorescence meristem. Co-activator of floral homeotic gene expression. Acts with LFY to regulate shoot apical meristem identity. Required for meristem maintenance. Regulates flowering under a non-inductive photoperiod. It p…	protein_coding	SPLAYED (SYD)	CHROMATIN REMODELING COMPLEX SUBUNIT R 3 (CHR3);SPLAYED (SYD)	0.489751	7.09053	15.8459	6.87157e-05
AT1G31540	AT1G31540.2	Disease resistance protein (TIR-NBS-LRR class) family;(source:Araport11)	protein_coding			0.489757	4.53531	19.584	9.62706e-06
AT1G13210	AT1G13210.1	Autoinhibited Ca2+/ATPase II. ALA11 acts redundantly with ALA3, ALA4, ALA5, ALA9, ALA10 in root and shoot development as well as PIN trafficking and polarity .	protein_coding	AUTOINHIBITED CA2+/ATPASE II (ACA.l)	AMINOPHOSPHOLIPID ATPASE 11 (ALA11);AUTOINHIBITED CA2+/ATPASE II (ACA.l)	0.490993	5.76589	9.46673	0.00209232
AT2G39580	AT2G39580.1	zinc finger C3H1 domain protein;(source:Araport11)	protein_coding			0.492225	5.95317	15.3122	9.11253e-05
AT3G56960	AT3G56960.1	Encodes a protein with phosphatidylinositol-4-phosphate 5-kinase activity that plays a role in pollen tip growth. The enzyme localizes to the apical plasma membrane and adjacent cytosolic region of pollen tubes. Overexpression of this gene leads to increased deposition of pectin in the cell wall at the tip of the pollen tube and causes altered pollen tube morphology.	protein_coding	PHOSPHATIDYL INOSITOL MONOPHOSPHATE 5 KINASE 4 (PIP5K4)	PHOSPHATIDYL INOSITOL MONOPHOSPHATE 5 KINASE 4 (PIP5K4)	0.492319	3.2405	11.6905	0.000628194
AT5G23050	AT5G23050.1	acyl-activating enzyme 17;(source:Araport11)	protein_coding	ACYL-ACTIVATING ENZYME 17 (AAE17)	ACYL-ACTIVATING ENZYME 17 (AAE17)	0.492689	6.3201	20.9394	4.74034e-06
AT2G28470	AT2G28470.1	putative beta-galactosidase (BGAL8 gene)	protein_coding	BETA-GALACTOSIDASE 8 (BGAL8)	BETA-GALACTOSIDASE 8 (BGAL8)	0.492816	6.69646	16.701	4.37589e-05
AT4G32060	AT4G32060.1	Encodes an EF-hand protein with homology to constituents of the mitochondrial Ca2+ uniporter machinery in mammals. MICU binds Ca2+ and localizes to the mitochondria in Arabidopsis. It is a negative regulator of mitochondrial calcium uptake. Mutants display elevated matrix calcium at steady state and modified calcium transient kinetics in vivo.	protein_coding	(MICU)	(MICU)	0.492979	7.54385	16.3746	5.19781e-05
AT5G10430	AT5G10430.1	Encodes arabinogalactan-protein (AGP4) that is expressed in female reproductive tissues. It is involved in promoting degeneration of the persistent synergid after fertilization. In mutant ovules, the persistent synergid does not degrade resulting in polytuby.	protein_coding	ARABINOGALACTAN PROTEIN 4 (AGP4)	ARABINOGALACTAN PROTEIN 4 (AGP4); (ATAGP4); (JAGGER)	0.494011	7.69944	18.4281	1.76438e-05
AT4G30490	AT4G30490.1	AFG1-like ATPase family protein;(source:Araport11)	protein_coding			0.495757	5.24724	18.807	1.44635e-05
AT4G15390	AT4G15390.1	HXXXD-type acyl-transferase family protein;(source:Araport11)	protein_coding			0.496444	8.10982	26.3829	2.80008e-07
AT1G11180	AT1G11180.2	Secretory carrier membrane protein (SCAMP) family protein;(source:Araport11)	protein_coding	SECRETORY CARRIER MEMBRANE PROTEIN 2 (SCAMP2)	(ATSCAMP2);SECRETORY CARRIER MEMBRANE PROTEIN 2 (SCAMP2)	0.497119	3.19772	7.91728	0.0048965
AT3G49290	AT3G49290.1	One of four ABI-like proteins.	protein_coding	ABL INTERACTOR-LIKE PROTEIN 2 (ABIL2)	ABL INTERACTOR-LIKE PROTEIN 2 (ABIL2)	0.497277	3.17274	7.88392	0.00498762
AT5G27610	AT5G27610.1	protein ALWAYS EARLY 1;(source:Araport11)	protein_coding	ALWAYS EARLY 1 (ALY1)	ALWAYS EARLY 1 (ALY1);ARABIDOPSIS THALIANA ALWAYS EARLY 1 (ATALY1)	0.497368	3.26741	10.221	0.00138853
AT3G13782	AT3G13782.1	Plants mutated in three ubiquitously expressed NAP1 genes (NAP1;1~NAP1;3) and organ-specifically expressed NAP1;4 gene show hypersensitivity to genotoxic stresses including UV and DSB-inducing agent Bleomycin. The NAP1 genes act synergistically with NRP genes in promoting somatic homologous recombination.	protein_coding	NUCLEOSOME ASSEMBLY PROTEIN1;4 (NAP1;4)	NUCLEOSOME/CHROMATIN ASSEMBLY FACTOR GROUP A 04 (NFA04);NUCLEOSOME/CHROMATIN ASSEMBLY FACTOR GROUP A 4 (NFA4);NUCLEOSOME ASSEMBLY PROTEIN1;4 (NAP1;4)	0.497713	3.3405	11.3978	0.000735294
AT5G13240	AT5G13240.1	Global repressor of RNA polymerase III (Pol III). Maf1 repressor activity is critical for plant survival during environmental stresses, and is regulated by its phosphorylation/dephosphorylation through the activity of TOR and PP4/PP2A phosphatases.	protein_coding	(MAF1)	(MAF1)	0.497724	4.8222	13.3269	0.00026162
AT3G20570	AT3G20570.1	early nodulin-like protein 9;(source:Araport11)	protein_coding	EARLY NODULIN-LIKE PROTEIN 9 (ENODL9)	EARLY NODULIN-LIKE PROTEIN 9 (ENODL9); (AtENODL9)	0.500839	4.86724	12.8041	0.000345853
AT4G18550	AT4G18550.1	DSEL is cytosolic acylhydrolase that shows prefential lipase activity against the sn-1 position of several classes of lipids, including 1,3-diacylglycerols and 1-monoacylglycerols. Overexpression of DSEL leads to increased peroxisome and oil body levels in cotyledons and reduced beta-oxidation activity in seedlings.	protein_coding	DAD1-LIKE SEEDING ESTABLISHMENT-RELATED LIPASE (DSEL)	ARABIDOPSIS THALIANA DAD1-LIKE SEEDING ESTABLISHMENT-RELATED LIPASE (AtDSEL);DAD1-LIKE SEEDING ESTABLISHMENT-RELATED LIPASE (DSEL)	0.500874	4.49926	10.0248	0.0015445
AT5G14730	AT5G14730.1	Unknown protein, expression induced by IDL7 and stress.	protein_coding			0.501109	5.10216	9.12361	0.00252331
AT1G09140	AT1G09140.1	Encodes a serine-arginine rich RNA binding protein involved in regulation of splicing (including splicing of itself). Exists as 3 alternative spliced forms that are differentially expressed. AT1G09140.1 predominantly accumulates in the cytosol in light grown plants.Barta et al (2010) have proposed a nomenclature for Serine/Arginine-Rich Protein Splicing Factors (SR proteins): Plant Cell. 2010, 22…	protein_coding	SERINE/ARGININE-RICH PROTEIN SPLICING FACTOR 30 (SR30)	SERINE-ARGININE PROTEIN 30 (ATSRP30);SERINE/ARGININE-RICH PROTEIN SPLICING FACTOR 30 (At-SR30);SERINE/ARGININE-RICH PROTEIN SPLICING FACTOR 30 (SR30)	0.503091	7.21817	9.50182	0.00205268
AT1G51850	AT1G51850.1	Malectin-like receptor-like kinase involved in MAMP mediated stomatal immunity. Interacts with BAK1/FLS2 signaling complex and subsequently phosphorylates and activates SLAC1.	protein_coding	STRESS INDUCED FACTOR 2 (SIF2)	STRESS INDUCED FACTOR 2 (SIF2)	0.504126	5.96312	10.7112	0.0010649
AT4G25170	AT4G25170.2	Uncharacterized conserved protein (UCP012943);(source:Araport11)	protein_coding			0.505949	6.55894	9.47003	0.00208856
AT3G43920	AT3G43920.2	Encodes a ribonuclease III family protein that is required for endogenous RDR2-dependent siRNA (but not miRNA) formation.	protein_coding	DICER-LIKE 3 (DCL3)	DICER-LIKE 3 (DCL3);DICER-LIKE 3 (ATDCL3)	0.50652	3.34505	9.21501	0.00240039
AT2G04690	AT2G04690.1	Pyridoxamine 5-phosphate oxidase family protein;(source:Araport11)	protein_coding			0.506555	5.82978	13.4466	0.000245455
AT1G34300	AT1G34300.1	lectin protein kinase family protein;(source:Araport11)	protein_coding			0.508438	5.6838	19.6974	9.07263e-06
AT1G79700	AT1G79700.2	WRI4 encodes an AP2/ERF-type transcriptional activator that specifically controls cuticular wax biosynthesis in Arabidopsis stems. It also functions to activate transcription of genes involved fatty acid biosynthesis during seed and flower development as well as stem wax biosynthesis. Targets identified by ChIP-seq include: LACS1, KCR1, PAS2, ECR, and WSD1.	protein_coding	WRINKLED 4 (WRI4)	WRINKLED 4 (WRI4)	0.509237	3.92119	10.1427	0.00144877
AT1G72410	AT1G72410.2	COP1-interacting protein-like protein;(source:Araport11)	protein_coding			0.510937	6.21784	18.1678	2.02272e-05
AT5G13010	AT5G13010.1	Encodes a nuclear localized DEAH-box containing protein that is involved in miRNA biogenesis. Loss of function mutants are embryo lethal. Gene silencing experiments demonstrated its role in the localization of DCL-1 and HYL1 to the nuclear D-body. In silenced lines, miRNA production is suppressed and plants have developmental abnormalities and are hypersensitive to fungal pathogens.	protein_coding	EMBRYO DEFECTIVE 3011 (EMB3011)	EMBRYO DEFECTIVE 3011 (EMB3011);FOREVER YOUNG (FEY);CLUMSY VEIN (CUV);PSR1-INTERACTING PROTEIN 1 (PINP1);HOMOLOG IN YEAST PRP16 (PRP16)	0.51154	6.94467	21.7561	3.09597e-06
AT3G26900	AT3G26900.1	Encodes a protein with some sequence similarity to shikimate kinases, but a truncated form of this protein (lacking a putative N-terminal chloroplast transit peptide) does not have shikimate kinase activity in vitro. skl1-3 mutants have a variegated phenotype and skl1-8 mutants have an albino phenotype consistent with the observation of chloroplast defects in these mutants.	protein_coding	SHIKIMATE KINASE-LIKE 1 (SKL1)	ARABIDOPSIS THALIANA SHIKIMATE KINASE-LIKE 1 (ATSKL1);SHIKIMATE KINASE-LIKE 1 (SKL1)	0.511867	4.33423	14.489	0.000140978
AT1G77920	AT1G77920.1	bZIP transcription factor family protein;(source:Araport11)	protein_coding	TGACG SEQUENCE-SPECIFIC BINDING PROTEIN 7 (TGA7)	TGACG SEQUENCE-SPECIFIC BINDING PROTEIN 7 (TGA7)	0.512435	4.82502	14.5644	0.000135452
AT4G14750	AT4G14750.1	Member of IQ67 (CaM binding) domain containing family.	protein_coding	IQ-DOMAIN 19 (IQD19)	IQ-DOMAIN 19 (IQD19)	0.512671	4.1324	12.0243	0.000525115
AT4G05200	AT4G05200.1	Encodes a cysteine-rich receptor-like protein kinase.	protein_coding	CYSTEINE-RICH RLK (RECEPTOR-LIKE PROTEIN KINASE) 25 (CRK25)	CYSTEINE-RICH RLK (RECEPTOR-LIKE PROTEIN KINASE) 25 (CRK25)	0.513134	5.65079	25.6729	4.04475e-07
AT4G15160	AT4G15160.1	According to PMID:14623884, PAC2 has not been correctly annotated; At4g15160 (protease inhibitor/seed storage/lipid transfer protein (LTP) family protein) containsAtPAC2(nucleotides 3269-3831).	protein_coding	(PAC2)	(PAC2)	0.513765	7.35549	10.8556	0.000984953
AT5G46090	AT5G46090.1	transmembrane protein, putative (DUF679);(source:Araport11)	protein_coding	DUF679 DOMAIN MEMBRANE PROTEIN 6 (DMP6)	DUF679 DOMAIN MEMBRANE PROTEIN 6 (DMP6)	0.513882	3.06786	10.217	0.00139155
AT5G24100	AT5G24100.1	Leucine-rich repeat protein kinase family protein;(source:Araport11)	protein_coding			0.515211	4.26118	11.5625	0.000672945
AT3G14990	AT3G14990.1	Encodes a homolog of animal DJ-1 superfamily protein. In the A. thaliana genome, three genes encoding close homologs of human DJ-1 were identified AT3G14990 (DJ1A), AT1G53280 (DJ1B) and AT4G34020 (DJ1C). Among the three homologs, DJ1C is essential for chloroplast development and viability. It exhibits glyoxalase activity towards glyoxal and methylglyoxal. The mRNA is cell-to-cell mobile.	protein_coding	DJ-1 HOMOLOG A (DJ1A)	DJ-1 HOMOLOG A (DJ1A);DJ-1 HOMOLOG A (AtDJ1A); (DJ-1A)	0.515483	10.6331	10.9401	0.000941073
AT3G07520	AT3G07520.1	member of Putative ligand-gated ion channel subunit family. Contains a functional cation - permeable pore domain. Involved in cellular cation homeostasis.	protein_coding	GLUTAMATE RECEPTOR 1.4 (GLR1.4)	GLUTAMATE RECEPTOR 1.4 (GLR1.4); (ATGLR1.4)	0.516107	2.71365	9.07952	0.00258487
AT1G03060	AT1G03060.1	Encodes a WD/BEACH domain protein involved in cell morphogenesis and ribonucleoprotein particle formation. It interacts with the P-body core component DCP2, associates to mRNA processing bodies (P-bodies), and regulates their assembly upon salt stress. It accumulates at the root hair apex via post-Golgi compartments and positively regulates tip growth by maintaining tip-focused vesicle secretion …	protein_coding	SPIRRIG (SPI)	BEACH-DOMAIN HOMOLOG A1 (BCHA1);SPIRRIG (SPI)	0.516737	6.48282	15.738	7.27484e-05
AT3G05920	AT3G05920.1	Heavy metal transport/detoxification superfamily protein;(source:Araport11)	protein_coding	HEAVY METAL ASSOCIATED PROTEIN 24 (ATHMP24)	HEAVY METAL ASSOCIATED PROTEIN 24 (ATHMP24)	0.518733	4.31193	15.0685	0.00010368
AT5G03830	AT5G03830.1	CDK inhibitor P21 binding protein;(source:Araport11)	protein_coding			0.520471	3.44992	8.51344	0.00352533
AT5G25910	AT5G25910.1	putative disease resistance protein induced by chitin oligomers.	protein_coding	RECEPTOR LIKE PROTEIN 52 (RLP52)	RECEPTOR LIKE PROTEIN 52 (RLP52);RECEPTOR LIKE PROTEIN 52 (AtRLP52)	0.520476	2.47449	9.20357	0.00241543
AT5G57070	AT5G57070.1	hydroxyproline-rich glycoprotein family protein;(source:Araport11)	protein_coding			0.521197	5.96034	28.0846	1.16129e-07
AT3G09220	AT3G09220.1	putative laccase, a member of laccase family of genes (17 members in Arabidopsis).	protein_coding	LACCASE 7 (LAC7)	LACCASE 7 (LAC7)	0.521726	8.50166	13.6923	0.000215336
AT1G24793	AT1G24793.1	UDP-3-O-acyl N-acetylglycosamine deacetylase family protein;(source:Araport11)	protein_coding	LIPID X C1 (LPXC1)	(ATLPXC1);LIPID X C1 (LPXC1)	0.521802	4.536	13.7717	0.000206428
AT3G14360	AT3G14360.1	Lipid droplet-associated triacylglycerol lipase (TAG) involved in pollen tube growth. TAG is possibly a direct precursor for the synthesis of membrane lipids in pollen tubes.	protein_coding	OIL BODY LIPASE 1 (ATOBL1)	OIL BODY LIPASE 1 (ATOBL1); (OBL1)	0.52216	2.84605	8.58632	0.00338698
AT1G07560	AT1G07560.1	Leucine-rich repeat protein kinase family protein;(source:Araport11)	protein_coding			0.523651	4.90051	17.335	3.13366e-05
AT3G06290	AT3G06290.1	Encodes a component of the conserved TREX-2 complex that couples mRNA transcription with nucleo-cytoplasmic export, that is required for prevention of epigenetic gene silencing and has additional roles in regulating siRNAs and DNA methylation.	protein_coding	YEAST SAC3 HOMOLOG B (SAC3B)	YEAST SAC3 HOMOLOG B (SAC3B); (AtSAC3B)	0.523946	5.88751	16.4045	5.11625e-05
AT2G17930	AT2G17930.1	Component of the SPT module of the SAGA complex.	protein_coding	(TRA1A)	(TRA1A)	0.524527	6.77069	14.1249	0.000171067
AT4G14780	AT4G14780.1	Protein kinase superfamily protein;(source:Araport11)	protein_coding			0.524595	3.90691	15.4891	8.29845e-05
AT5G23110	AT5G23110.1	Zinc finger, C3HC4 type (RING finger) family protein;(source:Araport11)	protein_coding			0.525926	6.15322	9.65538	0.00188798
AT5G25930	AT5G25930.1	kinase family with leucine-rich repeat domain-containing protein;(source:Araport11)	protein_coding			0.526489	5.17734	17.3506	3.10794e-05
AT1G61970	AT1G61970.1	Mitochondrial transcription termination factor family protein;(source:Araport11)	protein_coding	(MTERF29)	(MTERF29)	0.526713	3.28641	7.99924	0.00467969
AT3G09040	AT3G09040.1	Pentatricopeptide repeat (PPR) superfamily protein;(source:Araport11)	protein_coding	MITOCHONDRIAL RNA EDITING FACTOR 12 (MEF12)	MITOCHONDRIAL RNA EDITING FACTOR 12 (MEF12)	0.531086	2.3043	8.2079	0.00417083
AT4G30170	AT4G30170.1	Peroxidase family protein;(source:Araport11)	protein_coding			0.531284	8.45964	22.1007	2.58722e-06
AT3G19020	AT3G19020.1	Pollen expressed protein required for pollen tube growth. Along with other members of the LRX family, interacts with RALF4 to control pollen tube growth and integrity. Loss of function results in premature pollen tube rupture and reduced fertility.	protein_coding	LEUCINE-RICH REPEAT/EXTENSIN 8 (LRX8)	LEUCINE-RICH REPEAT/EXTENSIN 8 (LRX8)	0.532676	3.04232	16.359	5.24068e-05
AT4G40070	AT4G40070.1	RING/U-box superfamily protein;(source:Araport11)	protein_coding	ARABIDOPSIS T??XICOS EN LEVADURA 32 (ATL32)	ARABIDOPSIS T??XICOS EN LEVADURA 32 (ATL32)	0.532805	4.74728	7.98638	0.00471306
AT1G26580	AT1G26580.1	ELM2 domain protein;(source:Araport11)	protein_coding			0.532871	6.88066	17.2626	3.25538e-05
AT5G61990	AT5G61990.1	Pentatricopeptide repeat (PPR) superfamily protein;(source:Araport11)	protein_coding			0.535349	4.09875	16.5016	4.86083e-05
AT2G42040	AT2G42040.1	WRC protein;(source:Araport11)	protein_coding			0.53537	3.79159	14.568	0.000135194
AT1G64210	AT1G64210.1	Leucine-rich repeat protein kinase family protein;(source:Araport11)	protein_coding			0.535629	3.1625	9.25764	0.00234516
AT1G62440	AT1G62440.1	encodes a paralog of LRX1 (LEUCINE-RICH REPEAT/EXTENSIN 1) which acts synergistically with LRX1 in root hair cell morphogenesis.	protein_coding	LEUCINE-RICH REPEAT/EXTENSIN 2 (LRX2)	LEUCINE-RICH REPEAT/EXTENSIN 2 (LRX2)	0.536082	3.81479	12.2445	0.000466625
AT4G03820	AT4G03820.2	transmembrane protein, putative (DUF3537);(source:Araport11)	protein_coding			0.536143	4.03516	17.6122	2.70839e-05
AT5G63370	AT5G63370.1	CDKG1 interacts with the splicing factor RSZ33 to regulate proper splicing of Cals5 Pre-mRNA.	protein_coding	CYCLIN-DEPENDENT KINASE G1 (CDKG1)	CYCLIN-DEPENDENT KINASE G1 (CDKG1)	0.536496	7.38173	21.3627	3.80094e-06
AT4G21310	AT4G21310.1	DUF1218 family member.	protein_coding	DESIGUAL 2 (DEAL2)	DESIGUAL 2 (DEAL2)	0.537869	2.04947	8.25839	0.00405642
AT4G33330	AT4G33330.2	Encodes a glucuronyltransferase responsible for the addition of GlcA residues onto xylan and for secondary wall deposition.	protein_coding	PLANT GLYCOGENIN-LIKE STARCH INITIATION PROTEIN 3 (PGSIP3)	GLUCURONIC ACID SUBSTITUTION OF XYLAN 2 (GUX2);PLANT GLYCOGENIN-LIKE STARCH INITIATION PROTEIN 3 (PGSIP3)	0.538582	3.10897	9.34094	0.0022409
AT3G10320	AT3G10320.1	MUCI21 is a GT61 protein required for the production of highly branched xylan in seed coat mucilage. MUCI21 likely decorates xylan with xylose side chains that seem to be necessary for pectin attachment to the seed surface.	protein_coding	MUCILAGE-RELATED 21 (MUCI21)	MUCILAGE-MODIFIED 5 (MUM5); (MUM5);MUCILAGE-RELATED 21 (MUCI21)	0.538973	3.27444	12.0969	0.000505056
AT1G27200	AT1G27200.1	glycosyltransferase family protein (DUF23);(source:Araport11)	protein_coding			0.541368	4.67717	10.9268	0.000947822
AT1G61480	AT1G61480.1	S-locus lectin protein kinase family protein;(source:Araport11)	protein_coding			0.541734	2.40632	10.748	0.00104392
AT1G09710	AT1G09710.2	Paralog of DRMY1 with unknown function.	protein_coding	DRMY1 PARALOG 1 (DP1)	DRMY1 PARALOG 1 (DP1)	0.542428	3.41078	8.10398	0.00441682
AT3G57470	AT3G57470.2	Insulinase (Peptidase family M16) family protein;(source:Araport11)	protein_coding			0.542579	5.3521	15.6412	7.65695e-05
AT5G12930	AT5G12930.1	inactive rhomboid protein;(source:Araport11)	protein_coding			0.542632	3.09321	10.6311	0.00111204
AT3G23080	AT3G23080.1	Polyketide cyclase/dehydrase and lipid transport superfamily protein;(source:Araport11)	protein_coding			0.543509	4.81441	8.86763	0.00290272
AT3G14590	AT3G14590.2	Ca2+-dependent lipid-binding protein	protein_coding	(NTMC2T6.2)	(NTMC2T6.2); (NTMC2TYPE6.2)	0.54372	5.04945	12.6432	0.000376944
AT4G29180	AT4G29180.2	root hair specific 16;(source:Araport11)	protein_coding	ROOT HAIR SPECIFIC 16 (RHS16)	ROOT HAIR SPECIFIC 16 (RHS16)	0.546826	3.89242	14.9867	0.000108274
AT1G11100	AT1G11100.2	SNF2 domain-containing protein / helicase domain-containing protein / zinc finger protein-like protein;(source:Araport11)	protein_coding	SNF2-RING-HELICASE?LIKE 5 (FRG5)	SNF2-RING-HELICASE?LIKE 5 (FRG5)	0.547465	4.18839	7.86606	0.00503713
AT3G60130	AT3G60130.1	beta glucosidase 16;(source:Araport11)	protein_coding	BETA GLUCOSIDASE 16 (BGLU16)	BETA GLUCOSIDASE 16 (BGLU16)	0.548116	6.08943	27.6058	1.48734e-07
AT3G54920	AT3G54920.1	Powdery mildew resistant mutant encodes a pectate lyase-like protein The mRNA is cell-to-cell mobile.	protein_coding	POWDERY MILDEW RESISTANT 6 (PMR6)	POWDERY MILDEW RESISTANT 6 (PMR6)	0.548746	5.70872	16.5034	4.8562e-05
AT4G17500	AT4G17500.1	Encodes a member of the ERF (ethylene response factor) subfamily B-3 of ERF/AP2 transcription factor family (ATERF-1). The protein contains one AP2 domain. There are 18 members in this subfamily including ATERF-1, ATERF-2, AND ATERF-5. The mRNA is cell-to-cell mobile.	protein_coding	ETHYLENE RESPONSIVE ELEMENT BINDING FACTOR 1 (ERF-1)	ETHYLENE RESPONSIVE ELEMENT BINDING FACTOR 1 (ATERF-1);ETHYLENE RESPONSIVE ELEMENT BINDING FACTOR 1 (ERF-1); (ERF100); (ATERF#100); (ERF1A)	0.549358	6.10431	15.2051	9.64408e-05
AT1G33700	AT1G33700.1	Beta-glucosidase, GBA2 type family protein;(source:Araport11)	protein_coding			0.549731	5.49558	19.6862	9.12579e-06
AT1G63800	AT1G63800.1	ubiquitin-conjugating enzyme 5;(source:Araport11)	protein_coding	UBIQUITIN-CONJUGATING ENZYME 5 (UBC5)	UBIQUITIN-CONJUGATING ENZYME 5 (UBC5)	0.550892	5.79787	28.2093	1.08878e-07
AT2G29130	AT2G29130.1	Putative laccase, knockout mutant had reduced root elongation under PEG-induced dehydration.miR397b regulates root lignin deposition by regulating LACCASE2 expression during drought and phosphate deficiency.	protein_coding	LACCASE 2 (LAC2)	(ATLAC2);LACCASE 2 (LAC2)	0.551157	3.37741	14.943	0.00011081
AT1G74010	AT1G74010.1	Calcium-dependent phosphotriesterase superfamily protein;(source:Araport11)	protein_coding			0.551195	3.00132	15.0714	0.000103523
AT3G14270	AT3G14270.1	Encodes a protein that is predicted to act as a 1-phosphatidylinositol-3-phosphate (PtdIns3P) 5-kinase based on its homology to Fab1 from yeast. It contains an FYVE domain required for binding to PtdIns3P-containing membranes in yeast, as well as a Cpn60_TCP1 homology domain plus a kinase domain. fab1a/fab1b pollen grains not viable and have defective vacuolar organization. FAB1A and FAB1B comple…	protein_coding	FORMS APLOID AND BINUCLEATE CELLS 1B (FAB1B)	FORMS APLOID AND BINUCLEATE CELLS 1B (FAB1B)	0.551204	6.64657	33.2444	8.12753e-09
AT1G12090	AT1G12090.1	extensin-like protein (ELP)	protein_coding	EXTENSIN-LIKE PROTEIN (ELP)	EXTENSIN-LIKE PROTEIN (ELP)	0.551457	6.94669	20.99	4.61697e-06
AT2G43050	AT2G43050.1	Plant invertase/pectin methylesterase inhibitor superfamily;(source:Araport11)	protein_coding	(ATPMEPCRD)	(ATPMEPCRD)	0.551979	3.99369	8.99971	0.00270022
AT3G61160	AT3G61160.2	GS3-like kinase, subgroup III.	protein_coding	(SK31/ASK&#946;)	(ASK&#946;); (SK31/ASK&#946;)	0.553344	4.03416	13.2256	0.000276148
AT5G25110	AT5G25110.1	salt- and anoxia-induced member of AtCIPK family.	protein_coding	CBL-INTERACTING PROTEIN KINASE 25 (CIPK25)	SNF1-RELATED PROTEIN KINASE 3.25 (SnRK3.25);CBL-INTERACTING PROTEIN KINASE 25 (CIPK25)	0.554442	4.41255	11.4048	0.000732539
AT3G02910	AT3G02910.1	AIG2-like (avirulence induced gene) family protein;(source:Araport11)	protein_coding			0.554628	6.59536	20.1284	7.24117e-06
AT2G25140	AT2G25140.1	Encodes ClpB4, which belongs to the Casein lytic proteinase/heat shock protein 100 (Clp/Hsp100) family. Targeted to the mitochondrion, also referred to as ClpB-m. Transcripts of ClpB4 accumulate dramatically at high temperatures, suggesting that it may be involved in response to heat stress.	protein_coding	CASEIN LYTIC PROTEINASE B4 (CLPB4)	HEAT SHOCK PROTEIN 98.7 (HSP98.7);CASEIN LYTIC PROTEINASE B4 (CLPB4);CASEIN LYTIC PROTEINASE B-M (CLPB-M)	0.555549	5.79356	12.9254	0.000324151
AT4G19510	AT4G19510.1	Disease resistance protein (TIR-NBS-LRR class);(source:Araport11)	protein_coding			0.557173	4.66617	20.9243	4.778e-06
AT1G58030	AT1G58030.1	Encodes a member of the cationic amino acid transporter (CAT) subfamily of amino acid polyamine choline transporters. Localized to the tonoplast.	protein_coding	CATIONIC AMINO ACID TRANSPORTER 2 (CAT2)	(ATCAT2);CATIONIC AMINO ACID TRANSPORTER 2 (CAT2)	0.557379	7.54936	21.5724	3.40727e-06
AT1G29355	AT1G29355.1	hypothetical protein;(source:Araport11)	protein_coding			0.559176	4.94161	14.3035	0.000155577
AT1G10890	AT1G10890.1	arginine/glutamate-rich 1 protein;(source:Araport11)	protein_coding			0.559221	6.35442	15.3061	9.14218e-05
AT5G64000	AT5G64000.1	3'(2'),5'-bisphosphate nucleotidase	protein_coding	(SAL2)	(ATSAL2); (SAL2)	0.559587	3.45988	19.0401	1.27999e-05
AT3G01670	AT3G01670.1	Encodes a protein localized to phloem filaments that is required for phloem filament formation. The mRNA is cell-to-cell mobile.	protein_coding	SIEVE ELEMENT OCCLUSION A (SEOA)	SIEVE ELEMENT OCCLUSION A (SEOA);ARABIDOPSIS THALIANA SIEVE ELEMENT OCCLUSION-RELATED 2 (ATSEOR2);SIEVE ELEMENT OCCLUSION-RELATED 2 (SEOR2)	0.562714	5.57099	13.9473	0.000188009
AT2G32390	AT2G32390.3	Encodes a ionotropic glutamate receptor ortholog, a member of a putative ligand-gated ion channel subunit family.	protein_coding	GLUTAMATE RECEPTOR 3.5 (GLR3.5)	GLUTAMATE RECEPTOR 3.5 (GLR3.5)	0.563071	3.8321	8.3519	0.00385285
AT3G23510	AT3G23510.1	Cyclopropane-fatty-acyl-phospholipid synthase;(source:Araport11)	protein_coding			0.56457	6.3696	21.4088	3.71055e-06
AT4G00330	AT4G00330.1	high overall homology to CRCK1	protein_coding	CALMODULIN-BINDING RECEPTOR-LIKE CYTOPLASMIC KINASE 2 (CRCK2)	CALMODULIN-BINDING RECEPTOR-LIKE CYTOPLASMIC KINASE 2 (CRCK2)	0.565227	4.98717	21.1367	4.27656e-06
AT1G35660	AT1G35660.1	erythroid differentiation factor-like protein;(source:Araport11)	protein_coding			0.572094	4.5614	10.9961	0.000913033
AT4G11230	AT4G11230.1	NADPH-oxidase RbohI is expressed highly in seeds and roots. Mutants have inreased sensitivity to osmotic stress suggesting a role in mediating cellular response to stress in roots.	protein_coding	(RBOHI)	(RBOHI)	0.572596	2.42999	11.4121	0.000729678
AT5G40340	AT5G40340.1	PWWP domain protein involved in regulation of FLC and flowering time.	protein_coding	PWWP DOMAIN PROTEIN 3 (PDP3)	PWWP DOMAIN PROTEIN 3 (PDP3)	0.573313	5.81885	21.203	4.13125e-06
AT1G34315	AT1G34315.1	transmembrane protein;(source:Araport11)	protein_coding			0.575056	4.25636	9.83703	0.00171034
AT2G02765	AT2G02765.1	L-aminoadipate-semialdehyde dehydrogenase-phosphopantetheinyl transferase;(source:Araport11)	protein_coding			0.575087	3.12007	10.4961	0.00119625
AT1G21651	AT1G21651.1	zinc ion binding protein;(source:Araport11)	protein_coding			0.575478	3.83015	8.74832	0.00309888
AT5G54770	AT5G54770.1	Encodes a thiamine biosynthetic gene that has a dual function in thiamine biosynthesis and mitochondrial DNA damage tolerance. It appears to be involved in producing the thiazole portion of thiamine (vitamin B1). A crystal structure of the protein reveals that it forms a 2-ring homo-octamer. The mRNA is cell-to-cell mobile.	protein_coding	(THI1)	(THI1);THIAMINE4 (THI4);THIAZOLE REQUIRING (TZ)	0.576113	7.26081	11.0845	0.000870504
AT5G06860	AT5G06860.1	Encodes a polygalacturonase inhibiting protein involved in defense response. PGIPs inhibit the function of cell wall pectin degrading enzymes such as those produced by fungal pathogens. PGIP1 is induced by fungal infection. Suppressed in the proton sensitive stop1-mutant, but the transcription level was recovered by transformation of STOP2. Knockout mutant showed severe damage in the root tip in …	protein_coding	POLYGALACTURONASE INHIBITING PROTEIN 1 (PGIP1)	POLYGALACTURONASE INHIBITING PROTEIN 1 (PGIP1);POLYGALACTURONASE INHIBITING PROTEIN 1 (ATPGIP1)	0.576143	6.5928	31.3688	2.13379e-08
AT5G38350	AT5G38350.1	Disease resistance protein (NBS-LRR class) family;(source:Araport11)	protein_coding			0.576305	3.88334	15.0127	0.000106792
AT4G01540	AT4G01540.1	Encodes a membrane-bound NAC (for NAM, ATAF1/2, CUC2) transcription factor, designated NTM1 (for NAC with transmembrane motif1). NTM1 regulates cell division in Arabidopsis.	protein_coding	NAC WITH TRANSMEMBRANE MOTIF1 (NTM1)	NAC WITH TRANSMEMBRANE MOTIF1 (NTM1);ARABIDOPSIS NAC DOMAIN CONTAINING PROTEIN 68 (ANAC068)	0.577182	4.42546	7.87073	0.00502412
AT3G57530	AT3G57530.1	Calcium-dependent Protein Kinase. ABA signaling component that regulates the ABA-responsive gene expression via ABF4. AtCPK32 has autophosphorylation activity and can phosphorylate ABF4 in vitro	protein_coding	CALCIUM-DEPENDENT PROTEIN KINASE 32 (CPK32)	CALCIUM-DEPENDENT PROTEIN KINASE 32 (CPK32); (CDPK32); (ATCPK32)	0.577522	6.70872	12.3261	0.000446663
AT4G17140	AT4G17140.3	pleckstrin homology (PH) domain-containing protein;(source:Araport11)	protein_coding			0.577544	6.90634	17.951	2.26671e-05
AT4G35380	AT4G35380.1	Encodes one of the functionally redundant ARF guanine-nucleotide exchange factors (ARF-GEFs). Functions as regulators of post-Golgi trafficking.	protein_coding	BIG4 (BIG4)	BIG4 (BIG4)	0.578203	5.64254	25.523	4.3714e-07
AT2G25850	AT2G25850.2	Encodes a poly(A) polymerase. Located in the nucleus.	protein_coding	POLY(A) POLYMERASE 2 (PAPS2)	POLY(A) POLYMERASE 2 (PAPS2)	0.579946	5.3856	20.9999	4.59309e-06
AT1G10610	AT1G10610.1	basic helix-loop-helix (bHLH) DNA-binding superfamily protein;(source:Araport11)	protein_coding			0.580384	3.01858	8.35075	0.00385528
AT4G33300	AT4G33300.1	Encodes a member of the ADR1 family nucleotide-binding leucine-rich repeat (NB-LRR) immune receptors.	protein_coding	ADR1-LIKE 1 (ADR1-L1)	ADR1-LIKE 1 (ADR1-L1)	0.580863	7.07702	12.7655	0.000353074
AT2G43900	AT2G43900.1	Encodes a 5-inositol-phosphate phosphatase, that, in vitro, shows activity against IP(1,4,5).	protein_coding	INOSITOL-POLYPHOSPHATE 5-PHOSPHATASE 12 (5PTASE12)	INOSITOL-POLYPHOSPHATE 5-PHOSPHATASE 12 (5PTASE12)	0.581504	5.18755	11.0357	0.000893757
AT4G20070	AT4G20070.1	The gene encoding Arabidopsis thaliana Allantoate Amidohydrolase (AtAAH)which catalyzes the allantoate deiminase reaction (EC 3.5.3.9)is expressed in all parts of the plant being consistent with a function in purine turnover in Arabidopsis. The mRNA is cell-to-cell mobile.	protein_coding	ALLANTOATE AMIDOHYDROLASE (AAH)	ALLANTOATE AMIDOHYDROLASE (ATAAH);ALLANTOATE AMIDOHYDROLASE (AAH)	0.583291	5.39374	13.9486	0.000187878
AT1G76080	AT1G76080.1	Encodes a thioredoxin like protein. Localizes to the chloroplast and is redistributed to the chloroplast envelope under heat stress. It is involved in non host resistance and thermotolerance.	protein_coding	CHLOROPLASTIC DROUGHT-INDUCED STRESS PROTEIN OF 32 KD (CDSP32)	ARABIDOPSIS THALIANA CHLOROPLASTIC DROUGHT-INDUCED STRESS PROTEIN OF 32 KD (ATCDSP32);CHLOROPLASTIC DROUGHT-INDUCED STRESS PROTEIN OF 32 KD (CDSP32);TRX-LIKE 1 (TRXL1)	0.583738	4.88511	9.77836	0.00176578
AT4G01140	AT4G01140.1	transmembrane protein, putative (DUF1191);(source:Araport11)	protein_coding			0.584119	3.73599	12.9218	0.000324774
AT5G37500	AT5G37500.1	Encodes a guard cell outward potassium channel. Belongs to the Shaker family K+ channel. This family includes five groups based on phylogenetic analysis (FEBS Letters (2007) 581: 2357): I (inward rectifying channel): AKT1 (AT2G26650), AKT5 (AT4G32500) and SPIK (also known as AKT6, AT2G25600); II (inward rectifying channel): KAT1 (AT5G46240) and KAT2 (AT4G18290); III (weakly inward rectifying chan…	protein_coding	GATED OUTWARDLY-RECTIFYING K+ CHANNEL (GORK)	GATED OUTWARDLY-RECTIFYING K+ CHANNEL (GORK)	0.587059	4.55146	20.8479	4.97236e-06
AT3G18660	AT3G18660.2	Plants expressing an RNAi construct specifically targeting PGSIP1 was shown to have a dramatically reduced amount of starch. Encodes a glucuronyltransferase responsible for the addition of GlcA residues onto xylan and for secondary wall deposition.	protein_coding	PLANT GLYCOGENIN-LIKE STARCH INITIATION PROTEIN 1 (PGSIP1)	PLANT GLYCOGENIN-LIKE STARCH INITIATION PROTEIN 1 (PGSIP1);GLUCURONIC ACID SUBSTITUTION OF XYLAN 1 (GUX1)	0.587812	3.37365	12.2885	0.00045575
AT4G02430	AT4G02430.2	Barta et al (2010) have proposed a nomenclature for Serine/Arginine-Rich Protein Splicing Factors (SR proteins): Plant Cell. 2010, 22:2926.	protein_coding	SERINE/ARGININE-RICH PROTEIN SPLICING FACTOR 34B (SR34b)	SERINE/ARGININE-RICH PROTEIN SPLICING FACTOR 34B (At-SR34b);SERINE/ARGININE-RICH PROTEIN SPLICING FACTOR 34B (SR34b)	0.587989	5.57021	12.1664	0.000486589
AT1G73500	AT1G73500.1	member of MAP Kinase Kinase family. Autophosphorylates and also phosphorylates MPK3 and MPK6. Independently involved in ethylene and calmalexin biosynthesis. Induces transcription of ACS2, ACS6, ERF1, ERF2, ERF5, ERF6, CYP79B2, CYP79B3, CYP71A13 and PAD3.	protein_coding	MAP KINASE KINASE 9 (MKK9)	MAP KINASE KINASE 9 (MKK9); (ATMKK9)	0.588796	5.46293	7.7605	0.00534012
AT3G01680	AT3G01680.1	Encodes a protein localized to phloem filaments that is required for phloem filament formation. The mRNA is cell-to-cell mobile.	protein_coding	SIEVE-ELEMENT-OCCLUSION-RELATED 1 (SEOR1)	SIEVE-ELEMENT-OCCLUSION-RELATED 1 (SEOR1);SIEVE ELEMENT OCCLUSION B (SEOB);ARABIDOPSIS THALIANA SIEVE ELEMENT OCCLUSION-RELATED 1 (ATSEOR1)	0.590502	5.69325	23.3623	1.3418e-06
AT2G41070	AT2G41070.1	Transcription factor homologous to ABI5. Regulates AtEm1 expression by binding directly at the AtEm1 promoter. Located in the nucleus and expressed during seed maturation in the cotyledons and later in the whole embryo.	protein_coding	ENHANCED EM LEVEL (EEL)	(DPBF4);ENHANCED EM LEVEL (EEL); (ATBZIP12)	0.591602	3.22275	11.7365	0.000612868
AT1G31280	AT1G31280.1	Encodes Argonaute gene that binds viral siRNAs and is involved in antiviral defense response. Regulates innate immunity.Mutants have increased susceptibility to Potato virus X and tobacco rattle virus.	protein_coding	ARGONAUTE 2 (AGO2)	(ATAGO2);ARGONAUTE 2 (AGO2)	0.593428	5.1206	9.99306	0.00157131
AT2G34080	AT2G34080.1	Cysteine proteinases superfamily protein;(source:Araport11)	protein_coding			0.59388	4.33141	22.026	2.68976e-06
AT1G23040	AT1G23040.1	hydroxyproline-rich glycoprotein family protein;(source:Araport11)	protein_coding			0.595656	4.87672	16.3521	5.25965e-05
AT5G50760	AT5G50760.1	SAUR-like auxin-responsive protein family;(source:Araport11)	protein_coding	SMALL AUXIN UPREGULATED RNA 55 (SAUR55)	SMALL AUXIN UPREGULATED RNA 55 (SAUR55)	0.596235	6.02685	16.5266	4.79731e-05
AT3G62570	AT3G62570.1	Tetratricopeptide repeat (TPR)-like superfamily protein;(source:Araport11)	protein_coding			0.601301	2.76435	9.23171	0.00237859
AT5G19140	AT5G19140.1	aluminum induced protein with YGL and LRDR motifs;(source:Araport11)	protein_coding	(AILP1)	(AILP1); (AtAILP1)	0.601715	6.22035	27.7134	1.40684e-07
AT1G55850	AT1G55850.1	encodes a protein similar to cellulose synthase The mRNA is cell-to-cell mobile.	protein_coding	CELLULOSE SYNTHASE LIKE E1 (CSLE1)	CELLULOSE SYNTHASE LIKE E1 (CSLE1); (ATCSLE1)	0.603199	7.01379	31.9669	1.56825e-08
AT4G10510	AT4G10510.1	Subtilase family protein;(source:Araport11)	protein_coding			0.603991	2.74167	8.75596	0.00308592
AT5G22690	AT5G22690.1	Disease resistance protein (TIR-NBS-LRR class) family;(source:Araport11)	protein_coding			0.604743	3.36723	8.45677	0.00363688
AT5G45650	AT5G45650.1	subtilase family protein;(source:Araport11)	protein_coding			0.605487	2.82333	8.69132	0.0031973
AT5G18490	AT5G18490.1	vacuolar sorting-associated protein (DUF946);(source:Araport11)	protein_coding			0.60612	5.11848	18.0945	2.1021e-05
AT5G46410	AT5G46410.2	Encodes a SCP1-like small phosphatase (SSP). Three SSPs form a unique group with long N-terminal extensions: AT5G46410 (SSP4), AT5G11860 (SSP5), AT4G18140 (SSP4b). SSP4 and SSP4b were localized exclusively in the nuclei, whereas SSP5 accumulated in both nuclei and cytoplasm. All three SSPs encodes active CTD phosphatases like animal SCP1 family proteins, with distinct substrate specificities: SSP…	protein_coding	SCP1-LIKE SMALL PHOSPHATASE 4 (SSP4)	SCP1-LIKE SMALL PHOSPHATASE 4 (SSP4)	0.607073	5.84666	34.4948	4.27382e-09
AT3G22800	AT3G22800.1	Leucine-rich repeat (LRR) family protein;(source:Araport11)	protein_coding			0.60709	5.82525	13.3827	0.000253952
AT3G22460	AT3G22460.1	Encodes a member of a family of genes with O-acetylserine(thiol)lyase activity.	protein_coding	O-ACETYLSERINE (THIOL) LYASE (OAS-TL) ISOFORM A2 (OASA2)	O-ACETYLSERINE (THIOL) LYASE (OAS-TL) ISOFORM A2 (OASA2)	0.607493	4.89873	7.92647	0.00487167
AT1G53440	AT1G53440.1	Leucine-rich repeat transmembrane protein kinase;(source:Araport11)	protein_coding			0.6092	4.88339	11.6598	0.000638664
AT4G03230	AT4G03230.1	G-type lectin S-receptor-like Serine/Threonine-kinase;(source:Araport11)	protein_coding			0.612024	4.49853	25.1087	5.41892e-07
AT5G64860	AT5G64860.1	Encodes a maltotriose-metabolizing enzyme with chloroplastic &#945;-1,4-glucanotransferase activity. Mutant has altered starch degradation.	protein_coding	DISPROPORTIONATING ENZYME (DPE1)	(ATDPE1);DISPROPORTIONATING ENZYME (DPE1)	0.612332	4.5309	19.7524	8.81499e-06
AT5G20830	AT5G20830.1	Encodes a protein with sucrose synthase activity (SUS1).	protein_coding	SUCROSE SYNTHASE 1 (SUS1)	SUCROSE SYNTHASE 1 (SUS1);SUCROSE SYNTHASE 1 (SUSY1); (atsus1); (ASUS1)	0.612486	6.07192	30.6259	3.12887e-08
AT5G09440	AT5G09440.1	EXORDIUM like 4;(source:Araport11)	protein_coding	EXORDIUM LIKE 4 (EXL4)	EXORDIUM LIKE 4 (EXL4)	0.612664	6.33792	37.694	8.27574e-10
AT5G65390	AT5G65390.1	arabinogalactan protein 7;(source:Araport11)	protein_coding	ARABINOGALACTAN PROTEIN 7 (AGP7)	ARABINOGALACTAN PROTEIN 7 (AGP7)	0.616871	6.53934	29.3484	6.04655e-08
AT3G49960	AT3G49960.1	Its expression is enriched in root hair cells (compared to non-root hair cells) and this enrichment is associated with increase in the transcription-associated mark trimethylation of H3 lysine 4 (H3K4me3) and decrease in the Polycomb silencing-associated mark trimethylation of H3 lysine 27 (H3K27me3) in root hair cells relative to non-root hair cells.	protein_coding			0.617023	4.32376	11.2856	0.000781087
AT5G02230	AT5G02230.1	Haloacid dehalogenase-like hydrolase (HAD) superfamily protein;(source:Araport11)	protein_coding			0.620798	4.82564	16.8355	4.07633e-05
AT1G70460	AT1G70460.1	Encodes a member of the proline-rich extensin-like receptor kinase (PERK) family. This family consists of 15 predicted receptor kinases (PMID: 15653807).	protein_coding	PROLINE-RICH EXTENSIN-LIKE RECEPTOR KINASE 13 (PERK13)	ROOT HAIR SPECIFIC 10 (RHS10);PROLINE-RICH EXTENSIN-LIKE RECEPTOR KINASE 13 (AtPERK13);PROLINE-RICH EXTENSIN-LIKE RECEPTOR KINASE 13 (PERK13)	0.623053	4.10231	17.1528	3.44898e-05
AT3G05930	AT3G05930.1	germin-like protein (GLP8)	protein_coding	GERMIN-LIKE PROTEIN 8 (GLP8)	GERMIN-LIKE PROTEIN 8 (GLP8)	0.623206	3.49673	7.85562	0.00506629
AT2G31865	AT2G31865.2	poly(ADP-ribose) glycohydrolase 2;(source:Araport11)	protein_coding	POLY(ADP-RIBOSE) GLYCOHYDROLASE 2 (PARG2)	POLY(ADP-RIBOSE) GLYCOHYDROLASE 2 (PARG2); (ATPARG2)	0.623704	2.14286	8.25209	0.00407051
AT1G09090	AT1G09090.2	NADPH-oxidase AtrbohB plays a role in seed after-ripening. Major producer of superoxide in germinating seeds. AtrbohB pre-mRNA is alternatively spliced in seeds in a hormonally and developmentally regulated manner. ABA caused accumulation of AtrbohB-? mRNA and prevented prevented AtrbohB-a mRNA expression in fresh seeds.	protein_coding	RESPIRATORY BURST OXIDASE HOMOLOG B (RBOHB)	RESPIRATORY BURST OXIDASE HOMOLOG B (ATRBOHB);RESPIRATORY BURST OXIDASE HOMOLOG B (RBOHB)	0.624424	4.88699	35.0483	3.21627e-09
AT4G19060	AT4G19060.1	P-loop containing nucleoside triphosphate hydrolases superfamily protein;(source:Araport11)	protein_coding			0.624929	3.66208	13.2019	0.000279663
AT1G32230	AT1G32230.1	Encodes a protein belonging to the (ADP-ribosyl)transferase domain-containing subfamily of WWE protein-protein interaction domain protein family. Superoxide radicals are necessary and sufficient to propagate cell death or lesion formation in rcd1 mutants. Without stress treatment, RCD1 is localized in the nucleus. Under high salt or oxidative stress, RCD1 is found not only in the nucleus but also…	protein_coding	RADICAL-INDUCED CELL DEATH1 (RCD1)	RADICAL-INDUCED CELL DEATH1 (RCD1); (CEO);REDOX IMBALANCED 1 (RIMB1);ARABIDOPSIS THALIANA P8 (INTERACTING PROTEIN) (ATP8); (AtRCD1); (CEO1)	0.625431	8.81069	27.0914	1.94063e-07
AT5G65170	AT5G65170.1	VQ motif-containing protein;(source:Araport11)	protein_coding			0.627035	3.53066	10.8701	0.000977292
AT2G31730	AT2G31730.1	basic helix-loop-helix (bHLH) DNA-binding superfamily protein;(source:Araport11)	protein_coding			0.627821	2.95598	12.5179	0.000403073
AT3G11570	AT3G11570.1	Encodes a member of the TBL (TRICHOME BIREFRINGENCE-LIKE) gene family containing a plant-specific DUF231 (domain of unknown function) domain. TBL gene family has 46 members, two of which (TBR/AT5G06700 and TBL3/AT5G01360) have been shown to be involved in the synthesis and deposition of secondary wall cellulose, presumably by influencing the esterification state of pectic polymers. A nomenclature…	protein_coding	TRICHOME BIREFRINGENCE-LIKE 8 (TBL8)	TRICHOME BIREFRINGENCE-LIKE 8 (TBL8)	0.628766	1.89866	10.0616	0.00151391
AT3G01420	AT3G01420.1	Encodes an alpha-dioxygenase involved in protection against oxidative stress and cell death. Induced in response to Salicylic acid and oxidative stress. Independent of NPR1 in induction by salicylic acid. The mRNA is cell-to-cell mobile.	protein_coding	(DOX1)	ALPHA-DIOXYGENASE 1 (ALPHA-DOX1);PLANT ALPHA DIOXYGENASE 1 (PADOX-1); (DIOX1); (DOX1)	0.628912	9.82567	8.1127	0.00439561
AT2G43140	AT2G43140.2	bHLH129 is a nuclear localized basic helix loop helix protein. It has been shown to function as a transcriptional repressor. Overexpression of bHLH129 regulates root elongation and ABA response.	protein_coding	(BHLH129)	(BHLH129)	0.631425	4.81376	7.90658	0.00492553
AT1G07240	AT1G07240.1	Encodes a UDP-glucosyltransferase that plays a role in abscisic acid (ABA) glucosylation from ABA to ABA-glucose ester and regulates ABA homeostasis, thereby influencing the ABA signal network.	protein_coding	UDP-GLUCOSYL TRANSFERASE 71C5 (UGT71C5)	UDP-GLUCOSYL TRANSFERASE 71C5 (UGT71C5)	0.632295	5.68603	25.6162	4.16527e-07
AT1G50590	AT1G50590.1	RmlC-like cupins superfamily protein;(source:Araport11)	protein_coding			0.632903	2.17956	8.86299	0.00291011
AT5G66480	AT5G66480.1	bacteriophage N4 adsorption B protein;(source:Araport11)	protein_coding			0.634061	3.84311	10.9129	0.000954982
AT3G62680	AT3G62680.1	Proline-rich protein The mRNA is cell-to-cell mobile.	protein_coding	PROLINE-RICH PROTEIN 3 (PRP3)	ARABIDOPSIS THALIANA PROLINE-RICH PROTEIN 3 (ATPRP3);PROLINE-RICH PROTEIN 3 (PRP3)	0.634469	5.53029	24.0279	9.49517e-07
AT1G66180	AT1G66180.1	The gene encodes a putative aspartyl protease (ASP). Its expression is induced in response to light and ascorbate. The mRNA is cell-to-cell mobile.	protein_coding			0.635121	6.37881	10.3956	0.00126317
AT3G27510	AT3G27510.1	Cysteine/Histidine-rich C1 domain family protein;(source:Araport11)	protein_coding			0.636884	2.69289	14.1517	0.000168641
AT2G44500	AT2G44500.1	O-fucosyltransferase family protein;(source:Araport11)	protein_coding			0.636891	6.30573	24.8349	6.2457e-07
AT1G37130	AT1G37130.1	Identified as a mutant resistant to chlorate. Encodes nitrate reductase structural gene. Involved in nitrate assimilation. Has nitrate reductase activity. Up-regulated by the fungus P. indica. Binds transcription factor At2g35940. The mRNA is cell-to-cell mobile.	protein_coding	NITRATE REDUCTASE 2 (NIA2)	NITRATE REDUCTASE 2 (NIA2); (B29); (NIA2-1);ARABIDOPSIS NITRATE REDUCTASE 2 (ATNR2);NITRATE REDUCTASE (NR);NITRATE REDUCTASE 2 (NR2);CHLORATE RESISTANT 3 (CHL3)	0.639251	8.5928	8.61284	0.00333802
AT1G67810	AT1G67810.1	Encodes a protein capable of stimulating the cysteine desulfurase activity of CpNifS (AT1G08490) in vitro. SufE2:GFP localizes to the chloroplasts where it is likely to play a role in iron-sulfur cluster assembly. Transcript levels for this gene are high in the pollen relative to other organs based on RT-PCR analysis. The mRNA is cell-to-cell mobile.	protein_coding	SULFUR E2 (SUFE2)	SULFUR E2 (SUFE2)	0.641771	4.40344	7.72278	0.00545284
AT2G42330	AT2G42330.1	Transmembrane kinase involved in auxin signaling. Phosphorylates T101 of TAA1 to inactive the transaminase and block auxin biosynthesis.	protein_coding	TRANS-MEMBRANE KINASE 4 (TMK4)	TRANS-MEMBRANE KINASE 4 (TMK4)	0.641958	4.95124	13.1673	0.00028488
AT5G39970	AT5G39970.1	catalytics;(source:Araport11)	protein_coding			0.642472	4.5744	20.0911	7.38376e-06
AT1G62310	AT1G62310.1	Encodes a probable H3K9me2 demethylase. Functions in trichome morphogenesis via regulation of GL3.	protein_coding	(JMJ29)	(JMJ29)	0.642566	4.49653	25.22	5.11486e-07
AT2G16660	AT2G16660.1	Major facilitator superfamily protein;(source:Araport11)	protein_coding			0.64342	4.60523	12.1017	0.000503759
AT1G03990	AT1G03990.1	Long-chain fatty alcohol dehydrogenase family protein;(source:Araport11)	protein_coding			0.643536	2.32265	9.52915	0.00202233
AT3G58990	AT3G58990.1	Small subunit, which together with IPMI SSU1, IPMISSU2 and IPMI LSU1, is a member of heterodimeric isopropylmalate isomerase (IPMI). Together with IPMI SSU3 participates in the Met chain elongation pathway.	protein_coding	ISOPROPYLMALATE ISOMERASE 1 (IPMI1)	(IPMI SSU3);ISOPROPYLMALATE ISOMERASE 1 (IPMI1)	0.643669	5.12823	16.5405	4.76227e-05
AT3G15130	AT3G15130.1	Tetratricopeptide repeat (TPR)-like superfamily protein;(source:Araport11)	protein_coding			0.645995	1.65018	8.93384	0.00279935
AT1G53340	AT1G53340.1	Cysteine/Histidine-rich C1 domain family protein;(source:Araport11)	protein_coding			0.646013	3.04508	13.6832	0.000216386
AT3G45870	AT3G45870.1	nodulin MtN21-like transporter family protein	protein_coding	USUALLY MULTIPLE ACIDS MOVE IN AND OUT TRANSPORTERS 3 (UMAMIT3)	USUALLY MULTIPLE ACIDS MOVE IN AND OUT TRANSPORTERS 3 (UMAMIT3)	0.646652	1.66015	8.98089	0.00272817
AT5G36110	AT5G36110.1	Encodes a member of the CYP716A subfamily of cytochrome P450 monooxygenases with triterpene oxidizing activity catalyzing C-28 hydroxylation of alpha-amyrin, beta-amyrin, and lupeol, producing uvaol, erythrodiol, and betulin, respectively. Additionally, it shows carboxylation activity for the C-28 position of alpha- and beta-amyrin.	protein_coding	CYTOCHROME P450, FAMILY 716, SUBFAMILY A, POLYPEPTIDE 1 (CYP716A1)	CYTOCHROME P450, FAMILY 716, SUBFAMILY A, POLYPEPTIDE 1 (CYP716A1)	0.647103	2.16105	8.69281	0.00319467
AT2G31150	AT2G31150.1	ATP binding / ATPase;(source:Araport11)	protein_coding			0.647941	3.34332	13.5313	0.000234619
AT1G21580	AT1G21580.1	Encodes a zinc-finger protein that co-localizes with the exosome-associated RNA helicase HEN2 and functions as a co-factor of nuclear RNA quality control by the nucleoplasmic exosome.	protein_coding	SUPPRESSOR OF PAS2 1 (SOP1)	SUPPRESSOR OF PAS2 1 (SOP1)	0.649299	6.68586	39.0823	4.06321e-10
AT3G22240	AT3G22240.1	cysteine-rich/transmembrane domain PCC1-like protein;(source:Araport11)	protein_coding	CYSTEINE-RICH TRANSMEMBRANE MODULE 9 (ATHCYSTM9)	CYSTEINE-RICH TRANSMEMBRANE MODULE 9 (ATHCYSTM9)	0.65026	6.42177	19.1134	1.23177e-05
AT1G02660	AT1G02660.1	PLIP2 is a glycerolipid A1 lipase with substrate preference for monogalactosyldiacylglycerol. Expression is induced by ABA.	protein_coding	PLASTID LIPASE2 (PLIP2)	PLASTID LIPASE2 (PLIP2)	0.651456	3.61441	7.78103	0.00527977
AT4G27460	AT4G27460.1	Cystathionine beta-synthase (CBS) family protein;(source:Araport11)	protein_coding	CBS DOMAIN CONTAINING PROTEIN 5 (CBSX5)	CBS DOMAIN CONTAINING PROTEIN 5 (CBSX5)	0.652834	2.24693	8.54789	0.00345923
AT1G78460	AT1G78460.1	SOUL heme-binding family protein;(source:Araport11)	protein_coding	CYTOSOLIC HEME (TETRAPYRROLE) BINDING PROTEIN 3 (CHBP3)	CYTOSOLIC HEME (TETRAPYRROLE) BINDING PROTEIN 3 (CHBP3)	0.653723	3.74543	8.74754	0.0031002
AT3G26720	AT3G26720.1	Glycosyl hydrolase family 38 protein;(source:Araport11)	protein_coding			0.654213	7.51908	19.9989	7.7488e-06
AT3G32040	AT3G32040.1	Chloroplast localized GFDP synthase.	protein_coding	GERANYL(GERANYL)DIPHOSPHATE SYNTHASE 1 (ATGGPS10)	GERANYL(GERANYL)DIPHOSPHATE SYNTHASE 1 (ATGGPS10)	0.655038	2.54134	8.21625	0.0041517
AT3G01310	AT3G01310.1	Encodes a functional VIP1/PPIP5K-type ATP-grasp kinase that is involved in both InsP6 to InsP7 conversion and InsP7 to InsP8 conversion, producing the InsP8 cofactor of the ASK1-COI1-JAZ-jasmonate co-receptor complex. It is the major isoform in plants, is required for jasmonate-dependent defenses, and plays an important role in plant defenses against necrotrophic fungi and insect herbivores.	protein_coding	ARABIDOPSIS HOMOLOG OF YEAST VIP1 1 (ATVIP1)	ARABIDOPSIS HOMOLOG OF YEAST VIP1 1 (ATVIP1);VIP1 HOMOLOG 1 (VIP1);VIP HOMOLOG2 (VIH2)	0.655196	6.40308	17.4034	3.02283e-05
AT1G51890	AT1G51890.1	Leucine-rich repeat protein kinase family protein;(source:Araport11)	protein_coding			0.659765	4.19471	28.7718	8.14285e-08
AT4G17030	AT4G17030.1	Encodes EXLB1 (expansin-like B1), a member of the expansin family.	protein_coding	EXPANSIN-LIKE B1 (EXLB1)	EXPANSIN-LIKE B1 (ATEXLB1); (EXPR);EXPANSIN-LIKE B1 (EXLB1); (ATEXPR1); (ATHEXP BETA 3.1); (AT-EXPR)	0.660021	4.40652	9.20025	0.00241982
AT5G04960	AT5G04960.1	Encodes a protein that modulates the activity of pectin methylesterase within the cell wall.	protein_coding	PECTIN METHYLESTERASE46 (PME46)	PECTIN METHYLESTERASE46 (PME46)	0.669239	5.1398	10.7682	0.00103261
AT3G29810	AT3G29810.1	During the course of seed coat epidermal cell differentiation, COBRA-LIKE 2 plays a role in cellulose deposition into mucilage secretory cells of Arabidopsis seeds. COBRA-LIKE 2 affects mucilage solubility and cellulosic ray formation.	protein_coding	COBRA-LIKE PROTEIN 2 PRECURSOR (COBL2)	COBRA-LIKE PROTEIN 2 PRECURSOR (COBL2)	0.671287	3.35251	15.288	9.23004e-05
AT1G14240	AT1G14240.1	GDA1/CD39 nucleoside phosphatase family protein;(source:Araport11)	protein_coding	APYRASE3 (APY3)	APYRASE3 (APY3)	0.67219	4.81789	15.1564	9.89647e-05
AT1G02380	AT1G02380.1	transmembrane protein;(source:Araport11)	protein_coding			0.674902	1.28373	7.7649	0.00532711
AT5G02810	AT5G02810.1	PRR7 and PRR9 are partially redundant essential components of a temperature-sensitive circadian system. CCA1 and LHY had a positive effect on PRR7 expression levels. Acts as transcriptional repressor of CCA1 and LHY. Acts additively with EC, PRR5 and PRR9 to regulate hypocotyl growth under photoperiodic conditions.	protein_coding	PSEUDO-RESPONSE REGULATOR 7 (PRR7)	(APRR7);PSEUDO-RESPONSE REGULATOR 7 (PRR7)	0.675948	7.19049	15.4519	8.46302e-05
AT1G02920	AT1G02920.1	Encodes glutathione transferase belonging to the phi class of GSTs. Naming convention according to Wagner et al. (2002).	protein_coding	GLUTATHIONE S-TRANSFERASE 7 (GSTF7)	GLUTATHIONE S-TRANSFERASE 7 (GSTF7);ARABIDOPSIS GLUTATHIONE S-TRANSFERASE 11 (ATGST11); (ATGSTF8);GLUTATHIONE S-TRANSFERASE 11 (GST11); (ATGSTF7)	0.676274	4.53021	10.116	0.00146987
AT2G01008	AT2G01008.1	maternal effect embryo arrest protein;(source:Araport11)	protein_coding			0.678857	3.17784	13.9007	0.000192727
AT3G59350	AT3G59350.1	Pti-like protein. Interacts with CLV1 and functions in CLE peptide signaling pathway in root development. Membrane localization is dependent on palmytolation.	protein_coding	MAZZA (MAZ)	MAZZA (MAZ)	0.679844	5.16066	9.27589	0.0023219
AT5G48780	AT5G48780.1	disease resistance protein (TIR-NBS class);(source:Araport11)	protein_coding	TIR-NBS20 (TN20)	TIR-NBS20 (TN20)	0.680012	2.35143	11.7913	0.000595088
AT3G12720	AT3G12720.1	Member of the R2R3 factor gene family.	protein_coding	MYB DOMAIN PROTEIN 67 (MYB67)	(ATY53);MYB DOMAIN PROTEIN 67 (MYB67); (MYB67);MYB DOMAIN PROTEIN 67 (ATMYB67)	0.68075	2.65922	13.4682	0.000242639
AT5G48090	AT5G48090.1	EDM2-like protein1;(source:Araport11)	protein_coding	EDM2-LIKE PROTEIN1 (ELP1)	EDM2-LIKE PROTEIN1 (ELP1)	0.681893	1.39035	7.95736	0.00478922
AT3G23790	AT3G23790.1	AMP-dependent synthetase and ligase family protein;(source:Araport11)	protein_coding	ACYL ACTIVATING ENZYME 16 (AAE16)	ACYL ACTIVATING ENZYME 16 (AAE16)	0.682451	3.53527	15.8169	6.97748e-05
AT1G35240	AT1G35240.1	auxin response factor 20;(source:Araport11)	protein_coding	AUXIN RESPONSE FACTOR 20 (ARF20)	AUXIN RESPONSE FACTOR 20 (ARF20)	0.68389	2.01778	12.8548	0.00033661
AT1G12210	AT1G12210.1	RFL1 has high sequence similarity to the adjacent disease resistance (R) gene RPS5.	protein_coding	RPS5-LIKE 1 (RFL1)	RPS5-LIKE 1 (RFL1)	0.68429	2.6413	16.3402	5.29299e-05
AT1G22770	AT1G22770.1	Together with CONSTANTS (CO) and FLOWERING LOCUS T (FT), GIGANTEA promotes flowering under long days in a circadian clock-controlled flowering pathway. GI acts earlier than CO and FT in the pathway by increasing CO and FT mRNA abundance. Located in the nucleus. Regulates several developmental processes, including photoperiod-mediated flowering, phytochrome B signaling, circadian clock, carbohydra…	protein_coding	GIGANTEA (GI)	(FB);GIGANTEA (GI)	0.686104	7.26205	9.58918	0.00195728
AT4G11360	AT4G11360.1	Encodes a putative RING-H2 finger protein RHA1b. The mRNA is cell-to-cell mobile.	protein_coding	RING-H2 FINGER A1B (RHA1B)	RING-H2 FINGER A1B (RHA1B)	0.68921	5.75308	15.3771	8.8048e-05
AT1G60610	AT1G60610.1	SBP (S-ribonuclease binding protein) family protein;(source:Araport11)	protein_coding			0.691207	3.90144	28.1646	1.11422e-07
AT1G12790	AT1G12790.1	DNA ligase-like protein;(source:Araport11)	protein_coding			0.693595	2.29831	13.1706	0.00028437
AT4G04990	AT4G04990.1	serine/arginine repetitive matrix-like protein (DUF761);(source:Araport11)	protein_coding			0.69612	3.73368	19.8648	8.31179e-06
AT1G61890	AT1G61890.1	MATE efflux family protein;(source:Araport11)	protein_coding			0.696316	6.24199	10.2373	0.0013763
AT3G56220	AT3G56220.1	transcription regulator;(source:Araport11)	protein_coding			0.696554	1.98589	8.6694	0.00323597
AT4G37240	AT4G37240.1	PADRE protein down-regulated after infection by S. sclerotiorun.	protein_coding			0.700567	1.86697	8.6326	0.003302
AT4G32450	AT4G32450.1	Pentatricopeptide repeat (PPR) superfamily protein;(source:Araport11)	protein_coding	MEF8 SIMILAR (MEF8S)	MEF8 SIMILAR (MEF8S)	0.701677	3.93387	16.0677	6.11171e-05
AT3G26490	AT3G26490.1	Encodes a gene homologous to the NPY family based on deep phylogeny.	protein_coding	(NPY7)	(NPY7)	0.7019	1.13768	8.64621	0.00327743
AT5G38100	AT5G38100.1	SABATH family methyltransferase.	protein_coding			0.70244	2.70719	13.8418	0.000198865
AT1G61740	AT1G61740.1	Sulfite exporter TauE/SafE family protein;(source:Araport11)	protein_coding			0.706533	7.34558	9.83591	0.00171137
AT1G54970	AT1G54970.1	encodes a proline-rich protein that is specifically expressed in the root. The mRNA is cell-to-cell mobile.	protein_coding	PROLINE-RICH PROTEIN 1 (PRP1)	PROLINE-RICH PROTEIN 1 (ATPRP1);PROLINE-RICH PROTEIN 1 (PRP1);ROOT HAIR SPECIFIC 7 (RHS7)	0.708292	3.78611	11.1364	0.000846496
AT4G30670	AT4G30670.1	Putative membrane lipoprotein;(source:Araport11)	protein_coding			0.709178	5.86168	21.1758	4.19031e-06
AT3G02380	AT3G02380.1	homologous to the flowering-time gene CONSTANS (CO) encoding zinc-finger proteins	protein_coding	CONSTANS-LIKE 2 (COL2)	CONSTANS-LIKE 2 (COL2);B-BOX DOMAIN PROTEIN 3 (BBX3);CONSTANS-LIKE 2 (ATCOL2)	0.714477	3.21182	8.31399	0.0039341
AT3G49160	AT3G49160.1	Expression of the gene is downregulated in the presence of paraquat, an inducer of photoxidative stress.	protein_coding			0.722797	3.10774	12.7308	0.000359676
AT2G45180	AT2G45180.1	nsLTP family-related gene. Expression is strongly suppressed by bacterial pathogens. Mutants are more susceptible to pathogens and abiotic stressors suggesting a function in basal stress response.	protein_coding	DISEASE RELATED NONSPECI&#64257;C LIPID TRANSFER PROTEIN 1 (DRN1)	DISEASE RELATED NONSPECI&#64257;C LIPID TRANSFER PROTEIN 1 (DRN1)	0.724495	4.28414	17.9519	2.26564e-05
AT3G62780	AT3G62780.1	Calcium-dependent lipid-binding (CaLB domain) family protein;(source:Araport11)	protein_coding			0.72667	2.06224	8.82684	0.00296832
AT5G64260	AT5G64260.1	EXORDIUM like 2;(source:Araport11)	protein_coding	EXORDIUM LIKE 2 (EXL2)	EXORDIUM LIKE 2 (EXL2)	0.727525	8.21267	25.3391	4.80861e-07
AT4G23570	AT4G23570.3	Closely related to SGT1B, may function in SCF(TIR1) mediated protein degradation. AtSGT1a and AtSGT1b are functionally redundant in the resistance to pathogenes. AtSGT1b was more highly expressed than AtSGT1. The N-terminal TPR domain of AtSGT1a reduces the steady-state level of Arabidopsis SGT1 proteins whereas the same domain from AtSGT1b enhances SGT1 accumulation. The TPR domain is dispensabl…	protein_coding	(SGT1A)	(SGT1A)	0.728753	4.81339	13.1901	0.000281434
AT5G07580	AT5G07580.1	encodes a member of the ERF (ethylene response factor) subfamily B-3 of ERF/AP2 transcription factor family. The protein contains one AP2 domain. There are 18 members in this subfamily including ATERF-1, ATERF-2, AND ATERF-5.	protein_coding	(ERF106)	DECREASE WAX BIOSYNTHESIS2 (DEWAX2); (ERF106)	0.729555	5.61197	11.3338	0.000761079
AT1G72360	AT1G72360.2	Encodes a member of the ERF (ethylene response factor) subfamily B-2 of ERF/AP2 transcription factor family. The protein contains one AP2 domain. There are 5 members in this subfamily including RAP2.2 AND RAP2.12.	protein_coding	ETHYLENE RESPONSE FACTOR 73 (ERF73)	ETHYLENE RESPONSE FACTOR 73 (ERF73);HYPOXIA RESPONSIVE ERF (ETHYLENE RESPONSE FACTOR) 1 (HRE1); (AtERF73)	0.729929	4.69315	11.1222	0.000853009
AT5G59930	AT5G59930.1	Cysteine/Histidine-rich C1 domain family protein;(source:Araport11)	protein_coding			0.732441	2.32972	11.2835	0.000782011
AT1G22710	AT1G22710.1	Encodes for a high-affinity transporter essential for phloem loading and long-distance transport. A major sucrose transporter, AtSUC2 can also transport a wide range of physiological and synthetic glucose conjugates with both &#945;- or &#946;-linkage.	protein_coding	SUCROSE-PROTON SYMPORTER 2 (SUC2)	SUCROSE-PROTON SYMPORTER 2 (SUC2);ARABIDOPSIS THALIANA SUCROSE-PROTON SYMPORTER 2 (ATSUC2);SUCROSE TRANSPORTER 1 (SUT1)	0.734302	6.22287	23.8472	1.04295e-06
AT4G23920	AT4G23920.1	Encodes a protein with UDP-D-glucose 4-epimerase activity. Involved in growth and cell wall carbohydrate biosynthesis.	protein_coding	UDP-D-GLUCOSE/UDP-D-GALACTOSE 4-EPIMERASE 2 (UGE2)	UDP-GLC 4-EPIMERASE 2 (ATUGE2);UDP-D-GLUCOSE/UDP-D-GALACTOSE 4-EPIMERASE 2 (UGE2)	0.738409	3.24701	20.9276	4.76965e-06
AT1G68450	AT1G68450.1	VQ motif-containing protein;(source:Araport11)	protein_coding	PIGMENT DEFECTIVE 337 (PDE337)	PIGMENT DEFECTIVE 337 (PDE337)	0.739787	2.58551	13.6718	0.000217702
AT3G15356	AT3G15356.1	Legume lectin family protein;(source:Araport11)	protein_coding			0.741748	3.60376	15.5793	7.91166e-05
AT5G44870	AT5G44870.1	Encodes LAZ5, a TIR-class NB-LRR R protein of unknown pathogen specificity with sequence similarity to RPS4, an R protein conferring resistance to Pseudomonas syringae expressing the effector AvrRPS4. Overexpression of LAZ5 results in hypersensitive cell death (plants did not survive to set seeds).	protein_coding	LAZARUS 5 (LAZ5)	TOLERANCE TO TOBACCO RINGSPOT VIRUS 1 (TTR1);LAZARUS 5 (LAZ5)	0.746001	2.59829	11.698	0.000625659
AT2G01180	AT2G01180.1	Encodes phosphatidate phosphatase. Up-regulated by genotoxic stress (gamma ray or UV-B) and elicitor treatments with mastoparan and harpin. Expressed in roots and leaves.	protein_coding	PHOSPHATIDIC ACID PHOSPHATASE 1 (PAP1)	PHOSPHATIDIC ACID PHOSPHATASE 1 (ATPAP1);PHOSPHATIDIC ACID PHOSPHATASE 1 (PAP1);LIPID PHOSPHATE PHOSPHATASE 1 (LPP1); (ATLPP1)	0.74653	5.23963	13.8301	0.000200107
AT1G02810	AT1G02810.1	Plant invertase/pectin methylesterase inhibitor superfamily;(source:Araport11)	protein_coding			0.746932	5.58486	10.3881	0.00126831
AT3G25020	AT3G25020.1	receptor like protein 42;(source:Araport11)	protein_coding	RECEPTOR LIKE PROTEIN 42 (RLP42)	RECEPTOR LIKE PROTEIN 42 (AtRLP42);RESPONSE TO BOTRYTIS POLYGALACTURONASES 1 (RBPG1);RECEPTOR LIKE PROTEIN 42 (RLP42)	0.747486	2.42333	9.03809	0.00264412
AT1G73600	AT1G73600.2	Encodes a S-adenosyl-L-methionine-dependent phosphoethanolamine N-methyltransferase whose expression is responsive to both phosphate (Pi) and phosphite (Phi) in roots. It catalyzes the three sequential P-base methylation of phosphoethanolamine to phosphocholine. Homologous biochemical function to NMT1 (At3g18000). Double mutants of NMT1 and NMT3 are defective in leaf, root, flower, seed, and poll…	protein_coding	(NMT3)	(NMT); (DEG26);PHOSPHOETHANOLAMINE METHYLTRANSFERASE3 (ATPMT3); (NMT3)	0.748293	5.66998	9.58278	0.00196411
AT1G14640	AT1G14640.1	SWAP (Suppressor-of-White-APricot)/surp domain-containing protein;(source:Araport11)	protein_coding			0.748442	2.12011	11.4407	0.000718511
AT5G25140	AT5G25140.1	putative cytochrome P450	protein_coding	CYTOCHROME P450, FAMILY 71, SUBFAMILY B, POLYPEPTIDE 13 (CYP71B13)	CYTOCHROME P450, FAMILY 71, SUBFAMILY B, POLYPEPTIDE 13 (CYP71B13)	0.748568	3.98982	10.1718	0.00142601
AT3G20380	AT3G20380.1	TRAF-like family protein;(source:Araport11)	protein_coding			0.753977	4.60625	12.4977	0.000407447
AT4G25390	AT4G25390.1	Protein kinase superfamily protein;(source:Araport11)	protein_coding			0.754791	4.71655	13.7423	0.000209679
AT1G12780	AT1G12780.1	Encodes a UDP-glucose epimerase that catalyzes the interconversion of the sugar nucleotides UDP-glucose UDP-galactose via a UDP-4-keto-hexose intermediate. Responsive to stress.	protein_coding	UDP-D-GLUCOSE/UDP-D-GALACTOSE 4-EPIMERASE 1 (UGE1)	A. THALIANA UDP-GLC 4-EPIMERASE 1 (ATUGE1);UDP-D-GLUCOSE/UDP-D-GALACTOSE 4-EPIMERASE 1 (UGE1)	0.755103	7.15659	11.8823	0.000566686
AT4G06746	AT4G06746.1	encodes a member of the DREB subfamily A-5 of ERF/AP2 transcription factor family (RAP2.9). The protein contains one AP2 domain. There are 16 members in this subfamily including RAP2.1 and RAP2.10.	protein_coding	RELATED TO AP2 9 (RAP2.9)	RELATED TO AP2 9 (RAP2.9);DREB AND EAR MOTIF PROTEIN 5 (DEAR5)	0.76435	2.63245	15.5901	7.86653e-05
AT4G25707	AT4G25707.1	This gene encodes a small protein and has either evidence of transcription or purifying selection.	protein_coding			0.76483	1.98735	8.53753	0.00347898
AT1G02640	AT1G02640.1	encodes a protein similar to a beta-xylosidase located in the extracellular matrix. This is a member of glycosyl hydrolase family 3 and has six other closely related members.	protein_coding	BETA-XYLOSIDASE 2 (BXL2)	BETA-XYLOSIDASE 2 (ATBXL2);BETA-XYLOSIDASE 2 (BXL2)	0.765939	7.29461	9.27075	0.00232842
AT1G16400	AT1G16400.1	Encodes cytochrome P450 CYP79F2.	protein_coding	CYTOCHROME P450, FAMILY 79, SUBFAMILY F, POLYPEPTIDE 2 (CYP79F2)	CYTOCHROME P450, FAMILY 79, SUBFAMILY F, POLYPEPTIDE 2 (CYP79F2)	0.766198	5.10905	21.1265	4.2995e-06
AT5G25450	AT5G25450.1	Cytochrome bd ubiquinol oxidase, 14kDa subunit;(source:Araport11)	protein_coding			0.767033	3.09158	8.04239	0.00456953
AT1G32450	AT1G32450.1	Transmembrane nitrate transporter. Involved in xylem transport of nitrate from root to shoot. Induced in response to high and low concentrations of nitrate. Not involved in nitrate uptake. Expressed in root pericycle cells under the control of MYB59. Also functions as a proton-coupled H+/K+ antiporter for K+ loading into the xylem.	protein_coding	NRT1/ PTR FAMILY 7.3 (NPF7.3)	NITRATE TRANSPORTER 1.5 (NRT1.5); (ATNPF7.3);NRT1/ PTR FAMILY 7.3 (NPF7.3)	0.767106	9.68103	22.2337	2.41401e-06
AT2G38400	AT2G38400.2	alanine:glyoxylate aminotransferase 2 homolog (AGT3) mRNA,	protein_coding	ALANINE:GLYOXYLATE AMINOTRANSFERASE 3 (AGT3)	ALANINE:GLYOXYLATE AMINOTRANSFERASE 3 (AGT3)	0.770093	6.89909	10.4026	0.00125839
AT3G46130	AT3G46130.1	Encodes a putative transcription factor (MYB48) that functions to regulate flavonol biosynthesis primarily in cotyledons.	protein_coding	MYB DOMAIN PROTEIN 48 (MYB48)	MYB DOMAIN PROTEIN 111 (MYB111);MYB DOMAIN PROTEIN 48 (ATMYB48);MYB DOMAIN PROTEIN 48 (MYB48); (ATMYB48-3);PRODUCTION OF FLAVONOL GLYCOSIDES 3 (PFG3)	0.771892	5.37377	10.1919	0.00141056
AT3G52430	AT3G52430.1	Encodes a lipase-like gene that is important for salicylic acid signaling and function in resistance (R) gene-mediated and basal plant disease resistance. PAD4 can interact directly with EDS1, another disease resistance signaling protein. Expressed at elevated level in response to green peach aphid (GPA) feeding, and modulates the GPA feeding-induced leaf senescence through a mechanism that doesn…	protein_coding	PHYTOALEXIN DEFICIENT 4 (PAD4)	PHYTOALEXIN DEFICIENT 4 (PAD4);ARABIDOPSIS PHYTOALEXIN DEFICIENT 4 (ATPAD4)	0.772277	4.74076	11.5541	0.000676001
AT4G01430	AT4G01430.1	Encodes a plasma membrane-localized amino acid transporter likely involved in amino acid export in the developing seed.	protein_coding	USUALLY MULTIPLE ACIDS MOVE IN AND OUT TRANSPORTERS 29 (UMAMIT29)	USUALLY MULTIPLE ACIDS MOVE IN AND OUT TRANSPORTERS 29 (UMAMIT29)	0.776486	3.67021	18.3272	1.86033e-05
AT2G28670	AT2G28670.1	Encodes a protein of unknown function that is involved in formation of the casparian strip. ESB1 is localized to the casparian strip and this localization is depended on CASP1 and 2. esb1 mutants have increased levels of suberin, disordered casparian strip and altered levels of several ions in their leaves.	protein_coding	ENHANCED SUBERIN 1 (ESB1)	ENHANCED SUBERIN 1 (ESB1)	0.7812	5.18753	8.94499	0.00278232
AT3G23150	AT3G23150.1	Involved in ethylene perception in Arabidopsis The mRNA is cell-to-cell mobile.	protein_coding	ETHYLENE RESPONSE 2 (ETR2)	ETHYLENE RESPONSE 2 (ETR2)	0.786193	4.85288	21.0707	4.42648e-06
AT4G21870	AT4G21870.1	HSP20-like chaperone	protein_coding			0.786878	2.73993	8.15791	0.00428738
AT5G02160	AT5G02160.1	Zinc-finger domain containing protein involved in abiotic stress response. Possesses an N-terminal transit peptide followed by a hydrophobic domain and a zinc-finger domain. Despite the presence of a zinc-finger domain (C4-type) with two CXXCXGXG conserved repeats, characteristic of DNAJ protein, the conserved J domain is absent in FIP. Interacts with FtsH5. Gene expression levels are reduced and…	protein_coding	FTSH5 INTERACTING PROTEIN (FIP)	FTSH5 INTERACTING PROTEIN (FIP)	0.788869	3.94462	14.4455	0.000144274
AT3G28550	AT3G28550.1	Proline-rich extensin-like family protein;(source:Araport11)	protein_coding	EXTENSIN 16 (EXT16)	EXTENSIN 16 (EXT16)	0.790929	9.20496	20.5475	5.81709e-06
AT2G05185	AT2G05185.1	hypothetical protein;(source:Araport11)	protein_coding			0.793571	1.9529	12.8856	0.000331123
AT1G19960	AT1G19960.1	Unknown gene, expression decreased in response to Mn and increased by cytokinin.	protein_coding			0.797275	2.14364	11.464	0.000709573
AT2G41380	AT2G41380.1	S-adenosyl-L-methionine-dependent methyltransferases superfamily protein;(source:Araport11)	protein_coding			0.797366	5.83708	51.3423	7.75858e-13
AT4G13770	AT4G13770.1	Encodes a cytochrome p450 enzyme that catalyzes the initial conversion of aldoximes to thiohydroximates in the synthesis of glucosinolates not derived from tryptophan. Also has a role in auxin homeostasis.	protein_coding	CYTOCHROME P450, FAMILY 83, SUBFAMILY A, POLYPEPTIDE 1 (CYP83A1)	REDUCED EPIDERMAL FLUORESCENCE 2 (REF2);CYTOCHROME P450, FAMILY 83, SUBFAMILY A, POLYPEPTIDE 1 (CYP83A1)	0.797597	5.58319	16.5256	4.79977e-05
AT5G13210	AT5G13210.1	Uncharacterized conserved protein UCP015417, vWA;(source:Araport11)	protein_coding			0.798355	3.37807	9.14768	0.00249034
AT3G11580	AT3G11580.1	SOD7 encodes nuclear localized B3 DNA binding domain and a transcriptional repression motif. Belongs to the RAV gene family. Functions in regulation of seed size and binds to and represses KLU. Transcription repressor involved in regulation of inflorescence architecture.	protein_coding	NGATHA-LIKE PROTEIN2 (NGAL2)	SUPPRESSOR OF DA1-1 (SOD7);NGATHA-LIKE PROTEIN2 (NGAL2)	0.799312	2.37957	11.7826	0.000597871
AT5G56720	AT5G56720.1	predicted to encode a cytosolic malate dehydrogenase.	protein_coding	CYTOSOLIC-NAD-DEPENDENT MALATE DEHYDROGENASE 3 (c-NAD-MDH3)	CYTOSOLIC-NAD-DEPENDENT MALATE DEHYDROGENASE 3 (c-NAD-MDH3)	0.800337	1.88147	15.5382	8.08538e-05
AT1G35350	AT1G35350.1	EXS (ERD1/XPR1/SYG1) family protein;(source:Araport11)	protein_coding			0.800766	3.17172	22.9916	1.62714e-06
AT3G05160	AT3G05160.1	Major facilitator superfamily protein;(source:Araport11)	protein_coding			0.801238	4.48141	29.9088	4.52849e-08
AT5G49290	AT5G49290.1	receptor like protein 56;(source:Araport11)	protein_coding	RECEPTOR LIKE PROTEIN 56 (RLP56)	RECEPTOR LIKE PROTEIN 56 (RLP56);RECEPTOR LIKE PROTEIN 56 (ATRLP56)	0.804199	2.2138	13.038	0.000305229
AT5G25460	AT5G25460.1	Encodes a DUF642 cell wall protein.	protein_coding	DUF642 L-GALL RESPONSIVE GENE 2 (DGR2)	DUF642 L-GALL RESPONSIVE GENE 2 (DGR2)	0.809719	7.18752	22.0538	2.65115e-06
AT1G51830	AT1G51830.1	Leucine-rich repeat protein kinase family protein;(source:Araport11)	protein_coding	STRESS INDUCED FACTOR 1 (SIF1)	STRESS INDUCED FACTOR 1 (SIF1)	0.809809	7.44519	39.6189	3.08685e-10
AT1G44050	AT1G44050.1	Cysteine/Histidine-rich C1 domain family protein;(source:Araport11)	protein_coding			0.81573	3.26762	12.7376	0.000358384
AT2G38310	AT2G38310.1	Encodes a member of the PYR (pyrabactin resistance )/PYL(PYR1-like)/RCAR (regulatory components of ABA receptor) family proteins with 14 members. PYR/PYL/RCAR family proteins function as abscisic acid sensors. Mediate ABA-dependent regulation of protein phosphatase 2Cs ABI1 and ABI2. The mRNA is cell-to-cell mobile.	protein_coding	PYR1-LIKE 4 (PYL4)	PYR1-LIKE 4 (PYL4); (ATPYL4);REGULATORY COMPONENTS OF ABA RECEPTOR 10 (RCAR10)	0.816318	7.31477	18.2023	1.98641e-05
AT3G15340	AT3G15340.1	Encodes PPI2 (proton pump interactor 2), a homologue of PPI1, a protein that interacts with the plasma membrane H+ ATPase AHA1.	protein_coding	PROTON PUMP INTERACTOR 2 (PPI2)	PROTON PUMP INTERACTOR 2 (PPI2)	0.819336	2.75664	13.248	0.000272877
AT5G38200	AT5G38200.1	Class I glutamine amidotransferase-like superfamily protein;(source:Araport11)	protein_coding			0.819802	5.33068	28.6921	8.48495e-08
AT5G35190	AT5G35190.1	proline-rich extensin-like family protein;(source:Araport11)	protein_coding	EXTENSIN 13 (EXT13)	EXTENSIN 13 (EXT13)	0.821419	5.27208	14.3804	0.000149351
AT1G76930	AT1G76930.1	Encodes an Arabidopsis extensin gene that belongs to cell-wall hydroxyproline-rich glycoproteins. The cross-link of extensins enforces cell wall strength. Transgenic plants overexpressing this gene show an increase in stem thickness.	protein_coding	EXTENSIN 4 (EXT4)	EXTENSIN 4 (ATEXT4);OBP3-RESPONSIVE GENE 5 (ORG5);EXTENSIN 4 (EXT4);EXTENSIN 1 (EXT1);EXTENSIN 1 (ATEXT1)	0.822712	9.38336	46.2309	1.05105e-11
AT4G13390	AT4G13390.1	Proline-rich extensin-like family protein;(source:Araport11)	protein_coding	EXTENSIN 12 (EXT12)	EXTENSIN 12 (EXT12)	0.824703	5.15563	18.0445	2.15798e-05
AT5G40010	AT5G40010.1	Encodes a mitochondrial ATPase involved in seed and silique development.	protein_coding	AAA-ATPASE 1 (AATP1)	ATPASE-IN-SEED-DEVELOPMENT (ASD);AAA-ATPASE 1 (AATP1)	0.826706	1.38368	11.7113	0.000621206
AT3G26510	AT3G26510.5	Octicosapeptide/Phox/Bem1p family protein;(source:Araport11)	protein_coding			0.826916	4.63333	10.7099	0.00106567
AT2G01023	AT2G01023.1	hypothetical protein;(source:Araport11)	protein_coding			0.830872	1.08287	9.94625	0.00161177
AT5G19800	AT5G19800.1	hydroxyproline-rich glycoprotein family protein;(source:Araport11)	protein_coding	HYDROXYPROLINE-RICH GLYCOPROTEIN 2 (HRGP2)	HYDROXYPROLINE-RICH GLYCOPROTEIN 2 (HRGP2); (ATHRGP2)	0.836183	1.96013	8.35397	0.00384846
AT1G26250	AT1G26250.1	Proline-rich extensin-like family protein;(source:Araport11)	protein_coding	EXTENSIN 18 (EXT18)	EXTENSIN 18 (EXT18)	0.842686	5.84032	21.4973	3.54335e-06
AT3G28210	AT3G28210.1	Encodes a putative zinc finger protein (PMZ).	protein_coding	(PMZ)	STRESS-ASSOCIATED PROTEIN 12 (SAP12); (PMZ)	0.843555	2.80429	11.1524	0.000839225
AT5G22870	AT5G22870.1	Late embryogenesis abundant (LEA) hydroxyproline-rich glycoprotein family;(source:Araport11)	protein_coding			0.846831	1.40807	12.2459	0.000466276
AT4G13880	AT4G13880.1	receptor like protein 48;(source:Araport11)	protein_coding	RECEPTOR LIKE PROTEIN 48 (RLP48)	RECEPTOR LIKE PROTEIN 48 (RLP48);RECEPTOR LIKE PROTEIN 48 (AtRLP48)	0.847333	2.05491	18.6347	1.58309e-05
AT4G25560	AT4G25560.1	LAF1 is a R2R3-MYB transcription factor and positive regulator of the phyA photoresponse. Interaction of LAF1 with HFR1 stabilize the proteins against ubiquitination by COP1(AT2G32950) and subsequent degrations. Mutants have an elongated hypocotyl specifically under far-red light but retain wild-type responses to other light wavelengths.	protein_coding	LONG AFTER FAR-RED LIGHT 1 (LAF1)	LONG AFTER FAR-RED LIGHT 1 (LAF1);MYB DOMAIN PROTEIN 18 (MYB18);MYB DOMAIN PROTEIN 18 (AtMYB18)	0.851222	2.17258	16.09	6.0402e-05
AT4G19370	AT4G19370.1	chitin synthase, putative (DUF1218);(source:Araport11)	protein_coding	MODIFYING WALL LIGNIN-2 (MWL-2)	MODIFYING WALL LIGNIN-2 (MWL-2)	0.853527	2.71964	8.68447	0.00320933
AT1G72450	AT1G72450.1	JAZ6 transcript levels rise in response to a jasmonate stimulus and a GFP:JAZ6 fusion protein localizes to the nucleus. Application of jasmonate methyl ester to Arabidopsis roots reduces the levels of a JAZ6:GUS fusion protein, presumably by stimulating ubiquitin-proteasome-mediated degradation.	protein_coding	JASMONATE-ZIM-DOMAIN PROTEIN 6 (JAZ6)	TIFY DOMAIN PROTEIN 11B (TIFY11B);JASMONATE-ZIM-DOMAIN PROTEIN 6 (JAZ6)	0.853913	3.85833	13.2142	0.000277841
AT3G46530	AT3G46530.1	Confers resistance to the biotrophic oomycete, Peronospora parasitica. Encodes an NBS-LRR type R protein with a putative amino-terminal leucine zipper. Fungal protein ATR13 induces RPP13 gene expression and disease resistance. The mRNA is cell-to-cell mobile.	protein_coding	RECOGNITION OF PERONOSPORA PARASITICA 13 (RPP13)	RECOGNITION OF PERONOSPORA PARASITICA 11 (RPP11); (RPP11);RECOGNITION OF PERONOSPORA PARASITICA 13 (RPP13)	0.854595	3.12255	25.9356	3.52995e-07
AT3G62150	AT3G62150.1	Encodes a facultative transporter controlling auxin concentrations in plant cells.	protein_coding	ATP-BINDING CASSETTE B21 (ABCB21)	P-GLYCOPROTEIN 21 (PGP21);ATP-BINDING CASSETTE B21 (ABCB21)	0.856139	4.80393	13.2503	0.000272531
AT4G33000	AT4G33000.1	Encodes a member of the calcineurin B-like calcium sensor gene family. Mediates salt tolerance by regulating ion homeostasis in Arabidopsis.	protein_coding	CALCINEURIN B-LIKE PROTEIN 10 (CBL10)	(ATCBL10);CALCINEURIN B-LIKE PROTEIN 10 (CBL10)	0.857365	1.87282	18.3454	1.84265e-05
AT1G32520	AT1G32520.1	TLDc domain protein;(source:Araport11)	protein_coding	OXIDATION RESISTANCE 4 (OXR4)	OXIDATION RESISTANCE 4 (OXR4)	0.866829	1.5363	9.58947	0.00195697
AT1G75000	AT1G75000.1	ELO family protein.	protein_coding	ELO HOMOLOG 3 (ELO3)	ELO HOMOLOG 3 (ELO3)	0.87697	2.77579	9.81458	0.00173134
AT1G21500	AT1G21500.1	hypothetical protein;(source:Araport11)	protein_coding			0.877713	0.190474	8.04347	0.0045668
AT1G71710	AT1G71710.1	DNAse I-like superfamily protein;(source:Araport11)	protein_coding			0.881396	3.86442	24.7266	6.60648e-07
AT2G18193	AT2G18193.1	P-loop containing nucleoside triphosphate hydrolases superfamily protein;(source:Araport11)	protein_coding			0.883691	4.20883	16.6426	4.51265e-05
AT4G19920	AT4G19920.1	Toll-Interleukin-Resistance (TIR) domain family protein;(source:Araport11)	protein_coding			0.88373	2.14765	10.453	0.00122449
AT5G22799	AT5G22799.1	transmembrane protein;(source:Araport11)	protein_coding			0.885731	0.84949	7.89386	0.00496029
AT1G08430	AT1G08430.1	Encodes a Al-activated malate efflux transporter. It is essential for aluminum tolerance but does not represent the major Al tolerance QTL. Staurosporine and calyculin A both block all changes in AtALMT1 gene expression (as a result malate release is totally inhibited). AtALMT1 transcription was clearly induced by indole-3-acetic acid, abscisic acid, low pH, hydrogen peroxide and flg22. STOP1 and…	protein_coding	ALUMINUM-ACTIVATED MALATE TRANSPORTER 1 (ALMT1)	ARABIDOPSIS THALIANA ALUMINUM-ACTIVATED MALATE TRANSPORTER 1 (ATALMT1);ALUMINUM-ACTIVATED MALATE TRANSPORTER 1 (ALMT1)	0.888098	4.38922	8.61151	0.00334045
AT5G49360	AT5G49360.1	Encodes a bifunctional {beta}-D-xylosidase/{alpha}-L-arabinofuranosidase required for pectic arabinan modification. Located in the extracellular matrix. Gene is expressed specifically in tissues undergoing secondary wall thickening. This is a member of glycosyl hydrolase family 3 and has six other closely related members.	protein_coding	BETA-XYLOSIDASE 1 (BXL1)	BETA-XYLOSIDASE 1 (ATBXL1);BETA-XYLOSIDASE 1 (BXL1)	0.8913	7.01225	38.3218	5.99892e-10
AT5G23010	AT5G23010.1	Encodes a methylthioalkylmalate synthase, catalyzes the condensation reactions of the first two rounds of methionine chain elongation in the biosynthesis of methionine-derived glucosinolates. The mRNA is cell-to-cell mobile.	protein_coding	METHYLTHIOALKYLMALATE SYNTHASE 1 (MAM1)	GLUCOSINOLATE METABOLISM 1 (GSM1);METHYLTHIOALKYLMALATE SYNTHASE 1 (MAM1);2-ISOPROPYLMALATE SYNTHASE 3 (IMS3)	0.891496	5.10344	31.3834	2.11785e-08
AT4G15393	AT4G15393.2	a member of the cytochrome P450 gene family. molecular function unknown.	protein_coding	CYTOCHROME P450, FAMILY 702, SUBFAMILY A, POLYPEPTIDE 5 (CYP702A5)	CYTOCHROME P450, FAMILY 702, SUBFAMILY A, POLYPEPTIDE 5 (CYP702A5)	0.892669	5.2245	66.4846	3.52646e-16
AT5G08490	AT5G08490.1	Tetratricopeptide repeat (TPR)-like superfamily protein;(source:Araport11)	protein_coding	SLOW GROWTH 1 (SLG1)	SLOW GROWTH 1 (SLG1)	0.893655	1.43952	8.36998	0.0038147
AT3G28345	AT3G28345.1	Encodes an ATP-binding cassette (ABC) transporter. Expressed in the vascular tissue of primary stem.	protein_coding	ATP-BINDING CASSETTE B15 (ABCB15)	MULTI-DRUG RESISTANCE 13 (MDR13);ATP-BINDING CASSETTE B15 (ABCB15)	0.897722	8.02573	61.7792	3.84213e-15
AT4G16563	AT4G16563.1	Eukaryotic aspartyl protease family protein;(source:Araport11)	protein_coding			0.900896	4.47232	59.5309	1.2039e-14
AT1G07620	AT1G07620.1	GTP-binding protein Obg/CgtA;(source:Araport11)	protein_coding	(ATOBGM)	TON1 RECRUITING MOTIF 32 (TRM32); (ATOBGM)	0.900992	2.74123	20.7109	5.34115e-06
AT3G19663	AT3G19663.1	hypothetical protein;(source:Araport11)	protein_coding			0.904054	1.08573	9.71762	0.0018251
AT2G37820	AT2G37820.1	Cysteine/Histidine-rich C1 domain family protein;(source:Araport11)	protein_coding			0.904503	1.75827	16.3846	5.17044e-05
AT4G08950	AT4G08950.1	Phosphate-responsive 1 family protein;(source:Araport11)	protein_coding	EXORDIUM (EXO)	EXORDIUM (EXO)	0.913052	4.9648	13.1448	0.000288311
AT1G23720	AT1G23720.1	Proline-rich extensin-like family protein;(source:Araport11)	protein_coding	EXTENSIN 15 (EXT15)	EXTENSIN 15 (EXT15)	0.91908	8.97318	21.4639	3.60555e-06
AT1G06250	AT1G06250.1	alpha/beta-Hydrolases superfamily protein;(source:Araport11)	protein_coding			0.932581	0.742992	8.65877	0.0032549
AT4G13340	AT4G13340.1	Leucine rich extensin protein involved in cell wall biogenesis and organization. Interacts with several members of the RALF family of ligand peptides.	protein_coding	LEUCINE-RICH REPEAT/EXTENSIN 3 (LRX3)	LEUCINE-RICH REPEAT/EXTENSIN 3 (LRX3)	0.933472	6.719	15.0159	0.000106608
AT5G61900	AT5G61900.1	Encodes a plasma-membrane localized, copine-like protein, which is a member of a newly identified class of calcium-dependent, phospholipid binding proteins that are present in a wide range of organisms. Mutants exhibit temperature-sensitive growth defects and increased hypersensitive response where permissive conditions are low temperature (22 degrees Celsius) and low humidity. Gene is expressed …	protein_coding	BONZAI 1 (BON1)	BONZAI 1 (BON1); (BON);COPINE 1 (CPN1)	0.93584	4.43974	37.0072	1.17692e-09
AT1G33320	AT1G33320.1	Pyridoxal phosphate (PLP)-dependent transferases superfamily protein;(source:Araport11)	protein_coding			0.937979	1.13434	8.84976	0.00293128
AT1G76705	AT1G76705.1	calmodulin binding protein;(source:Araport11)	protein_coding			0.939523	0.51525	7.99095	0.00470118
AT3G19710	AT3G19710.1	Belongs to the branched-chain amino acid aminotransferase gene family. Encodes a methionine-oxo-acid transaminase. Involved in the methionine chain elongation pathway that leads to the ultimate biosynthesis of methionine-derived glucosinolates.	protein_coding	BRANCHED-CHAIN AMINOTRANSFERASE4 (BCAT4)	BRANCHED-CHAIN AMINOTRANSFERASE4 (BCAT4)	0.940662	5.22618	14.7762	0.000121056
AT5G10435	AT5G10435.1	transmembrane protein;(source:Araport11)	protein_coding			0.947736	3.66371	12.0993	0.000504414
AT3G29410	AT3G29410.1	Terpenoid cyclases/Protein prenyltransferases superfamily protein;(source:Araport11)	protein_coding	TERPENE SYNTHASE 25 (TPS25)	TERPENE SYNTHASE 25 (TPS25)	0.949815	2.73713	8.42009	0.00371096
AT3G19680	AT3G19680.1	hypothetical protein (DUF1005);(source:Araport11)	protein_coding			0.954387	5.25267	13.0697	0.000300104
AT3G13760	AT3G13760.1	Cysteine/Histidine-rich C1 domain family protein;(source:Araport11)	protein_coding			0.955829	4.61756	48.4078	3.46194e-12
AT3G45970	AT3G45970.1	member of EXPANSIN-LIKE. Naming convention from the Expansin Working Group (Kende et al, 2004. Plant Mol Bio) The mRNA is cell-to-cell mobile.	protein_coding	EXPANSIN-LIKE A1 (EXLA1)	EXPANSIN-LIKE A1 (ATEXLA1);EXPANSIN L1 (EXPL1);EXPANSIN-LIKE A1 (EXLA1); (ATHEXP BETA 2.1); (ATEXPL1)	0.955922	4.03766	9.60528	0.00194018
AT2G43590	AT2G43590.1	Chitinase family protein;(source:Araport11)	protein_coding			0.956924	5.21283	19.0313	1.28591e-05
AT2G07696	AT2G07696.1	Ribosomal protein S7p/S5e family protein;(source:Araport11)	protein_coding			0.959804	0.764985	9.17233	0.00245701
AT3G54580	AT3G54580.1	Proline-rich extensin-like family protein;(source:Araport11)	protein_coding	EXTENSIN 17 (EXT17)	EXTENSIN 17 (EXT17)	0.965322	8.29832	41.2126	1.36537e-10
AT1G61560	AT1G61560.1	A member of a large family of seven-transmembrane domain proteins specific to plants, homologs of the barley mildew resistance locus o (MLO) protein. The Arabidopsis genome contains 15 genes encoding MLO proteins, with localization in plasma membrane. Phylogenetic analysis revealed four clades of closely-related AtMLO genes. ATMLO6 belongs to the clade IV, with AtMLO2, AtMLO3 and AtMLO12. The gen…	protein_coding	MILDEW RESISTANCE LOCUS O 6 (MLO6)	MILDEW RESISTANCE LOCUS O 6 (ATMLO6);MILDEW RESISTANCE LOCUS O 6 (MLO6)	0.966251	4.94767	36.4553	1.56207e-09
AT1G62510	AT1G62510.1	Expressed in the root cortex.	protein_coding			0.97036	4.05748	32.8899	9.75283e-09
AT2G43150	AT2G43150.1	Proline-rich extensin-like family protein;(source:Araport11)	protein_coding	EXTENSIN 21 (EXT21)	EXTENSIN 21 (EXT21)	0.974536	11.8276	49.3066	2.18928e-12
AT1G78450	AT1G78450.1	SOUL heme-binding family protein;(source:Araport11)	protein_coding			0.975449	2.80072	19.0023	1.30559e-05
AT3G53230	AT3G53230.1	CDC48 is induced upon oilseed rape mosaic tobamovirus infection and appears to be involved in controlling virus movement.	protein_coding	CELL DIVISION CYCLE 48B (ATCDC48B)	CELL DIVISION CYCLE 48B (ATCDC48B)	0.97862	6.63941	24.1161	9.06973e-07
AT3G54590	AT3G54590.1	Encodes a hydroxyproline-rich glycoprotein. The mRNA is cell-to-cell mobile.	protein_coding	HYDROXYPROLINE-RICH GLYCOPROTEIN (HRGP1)	HYDROXYPROLINE-RICH GLYCOPROTEIN (ATHRGP1);EXTENSIN 2 (EXT2);HYDROXYPROLINE-RICH GLYCOPROTEIN (HRGP1)	0.982155	6.52693	46.6934	8.30078e-12
AT1G19540	AT1G19540.1	NmrA-like negative transcriptional regulator family protein;(source:Araport11)	protein_coding			0.983373	3.27951	43.2504	4.81634e-11
AT1G69490	AT1G69490.1	Encodes a member of the NAC transcription factor gene family. It is expressed in floral primordia and upregulated by AP3 and PI. Its expression is associated with leaf senescence. The mRNA is cell-to-cell mobile.	protein_coding	NAC-LIKE, ACTIVATED BY AP3/PI (NAP)	NAC-LIKE, ACTIVATED BY AP3/PI (NAP);ARABIDOPSIS NAC DOMAIN CONTAINING PROTEIN 29 (ANAC029);NAC-LIKE, ACTIVATED BY AP3/PI (ATNAP)	0.984646	1.86579	21.4636	3.60615e-06
AT1G19530	AT1G19530.1	Direct target of RGA, plays an essential role in GA-mediated tapetum and pollen development.	protein_coding	RGA TARGET 1 (RGAT1)	RGA TARGET 1 (RGAT1)	0.985346	6.3461	16.6345	4.53198e-05
AT3G02020	AT3G02020.1	encodes a monofunctional aspartate kinase	protein_coding	ASPARTATE KINASE 3 (AK3)	ASPARTATE KINASE 3 (AK3)	0.986703	4.95446	30.2196	3.85781e-08
AT3G56400	AT3G56400.1	Member of WRKY Transcription Factor; Group III. Function as activator of SA-dependent defense genes and a repressor of JA-regulated genes. WRKY70-controlled suppression of JA-signaling is partly executed by NPR1.	protein_coding	WRKY DNA-BINDING PROTEIN 70 (WRKY70)	ARABIDOPSIS THALIANA WRKY DNA-BINDING PROTEIN 70 (ATWRKY70);WRKY DNA-BINDING PROTEIN 70 (WRKY70)	0.987467	1.46491	8.30239	0.0039593
AT1G43160	AT1G43160.1	encodes a member of the ERF (ethylene response factor) subfamily B-4 of ERF/AP2 transcription factor family (RAP2.6). The protein contains one AP2 domain. There are 7 members in this subfamily.	protein_coding	RELATED TO AP2 6 (RAP2.6)	ETHYLENE RESPONSIVE FACTOR113 (ERF113);RELATED TO AP2 6 (RAP2.6)	0.989245	4.62039	10.3565	0.00129018
AT2G42170	AT2G42170.1	Actin family protein;(source:Araport11)	protein_coding			0.989967	0.451592	10.8949	0.000964319
AT1G72900	AT1G72900.1	Toll-Interleukin-Resistance (TIR) domain-containing protein;(source:Araport11)	protein_coding	TIR-NBS7 (TN7)	TIR-NBS7 (TN7)	0.99663	3.34436	15.4634	8.41176e-05
AT5G46490	AT5G46490.2	Disease resistance protein (TIR-NBS-LRR class) family;(source:Araport11)	protein_coding			1.00129	0.22692	10.5581	0.00115682
AT1G57990	AT1G57990.1	Member of a family of proteins related to PUP1, a purine transporter. May be involved in the transport of purine and purine derivatives such as cytokinins, across the plasma membrane.	protein_coding	PURINE PERMEASE 18 (PUP18)	PURINE PERMEASE 18 (ATPUP18);PURINE PERMEASE 18 (PUP18)	1.00617	5.21786	11.4412	0.000718338
AT4G12400	AT4G12400.2	Encodes one of the 36 carboxylate clamp (CC)-tetratricopeptide repeat (TPR) proteins (Prasad 2010, Pubmed ID: 20856808) with potential to interact with Hsp90/Hsp70 as co-chaperones.	protein_coding	HOP3 (Hop3)	HOP3 (Hop3)	1.00819	6.01739	8.27333	0.00402316
ATMG00180	ATMG00180.1	cytochrome c biogenesis orf452	protein_coding	CYTOCHROME C BIOGENESIS 452 (CCB452)	CYTOCHROME C BIOGENESIS 452 (CCB452);CCMF HOMOLOG C-TERMINUS (CCMFC)	1.01229	0.972435	11.1625	0.000834665
ATMG01360	ATMG01360.1	cytochrome c oxidase subunit 1	protein_coding	CYTOCHROME OXIDASE (COX1)	CYTOCHROME OXIDASE (COX1)	1.01512	1.17614	8.28164	0.00400478
AT2G41730	AT2G41730.1	Expression in rosette leaves is activated by high concentration of boron.	protein_coding	(HRG1)	(HRG1)	1.01842	1.03879	8.33381	0.0038914
AT3G52520	AT3G52520.1	hypothetical protein;(source:Araport11)	protein_coding			1.02421	1.37168	12.1515	0.000490495
AT3G13750	AT3G13750.1	beta-galactosidase, glycosyl hydrolase family 35 The mRNA is cell-to-cell mobile.	protein_coding	BETA GALACTOSIDASE 1 (BGAL1)	BETA-GALACTOSIDASE 1 (BGAL1);BETA GALACTOSIDASE 1 (BGAL1)	1.02789	8.99553	22.5127	2.08757e-06
AT2G40330	AT2G40330.1	Encodes a member of the PYR (pyrabactin resistance )/PYL(PYR1-like)/RCAR (regulatory components of ABA receptor) family proteins with 14 members. PYR/PYL/RCAR family proteins function as abscisic acid sensors. Mediate ABA-dependent regulation of protein phosphatase 2Cs ABI1 and ABI2.	protein_coding	PYR1-LIKE 6 (PYL6)	PYR1-LIKE 6 (PYL6);REGULATORY COMPONENTS OF ABA RECEPTOR 9 (RCAR9)	1.029	5.96853	9.76629	0.00177741
AT5G63270	AT5G63270.1	RPM1-interacting protein 4 (RIN4) family protein;(source:Araport11)	protein_coding			1.03882	1.36443	10.6881	0.00107826
AT2G07718	AT2G07718.1	Cytochrome b/b6 protein;(source:Araport11)	protein_coding			1.04014	2.76359	13.6022	0.000225926
AT2G35710	AT2G35710.1	Nucleotide-diphospho-sugar transferases superfamily protein;(source:Araport11)	protein_coding	PLANT GLYCOGENIN-LIKE STARCH INITIATION PROTEIN 7 (PGSIP7)	PLANT GLYCOGENIN-LIKE STARCH INITIATION PROTEIN 7 (PGSIP7)	1.0402	2.71177	12.5825	0.000389377
AT5G38865	AT5G38865.1	hypothetical protein;(source:Araport11)	protein_coding			1.04299	0.646005	7.89164	0.00496638
AT1G72416	AT1G72416.3	Chaperone DnaJ-domain superfamily protein;(source:Araport11)	protein_coding			1.04328	4.5313	12.5577	0.00039458
AT1G53990	AT1G53990.1	Contains lipase signature motif and GDSL domain. The mRNA is cell-to-cell mobile.	protein_coding	GDSL-MOTIF LIPASE 3 (GLIP3)	GDSL-MOTIF LIPASE 3 (GLIP3)	1.04516	3.02491	19.6166	9.46439e-06
AT4G13820	AT4G13820.1	Leucine-rich repeat (LRR) family protein;(source:Araport11)	protein_coding			1.04539	-0.308602	7.89617	0.00495395
AT5G64810	AT5G64810.1	member of WRKY Transcription Factor; Group II-c. Involved in jasmonic acid inducible defense responses.	protein_coding	WRKY DNA-BINDING PROTEIN 51 (WRKY51)	WRKY DNA-BINDING PROTEIN 51 (WRKY51);ARABIDOPSIS THALIANA WRKY DNA-BINDING PROTEIN 51 (ATWRKY51)	1.04555	0.835731	10.2973	0.00133227
AT4G25790	AT4G25790.1	CAP (Cysteine-rich secretory proteins, Antigen 5, and Pathogenesis-related 1 protein) superfamily protein;(source:Araport11)	protein_coding	(ATCAPE4)	(ATCAPE4)	1.05094	2.29367	12.6843	0.000368743
AT3G49580	AT3G49580.1	response to low sulfur 1;(source:Araport11)	protein_coding	RESPONSE TO LOW SULFUR 1 (LSU1)	RESPONSE TO LOW SULFUR 1 (LSU1)	1.055	3.10494	10.3297	0.00130903
AT5G11670	AT5G11670.1	The malic enzyme (EC 1.1.1.40) encoded by AtNADP-ME2 is presumably a cytosolic enzyme involved in malate metabolism and possibly assisting the oxidative pentose phosphate pathway. AtNADP-ME2 counts for the major part of NADP-ME activity in mature tissues of Arabidopsis.	protein_coding	NADP-MALIC ENZYME 2 (NADP-ME2)	NADP-MALIC ENZYME 2 (NADP-ME2);ARABIDOPSIS THALIANA NADP-MALIC ENZYME 2 (ATNADP-ME2)	1.06259	9.73828	32.1285	1.44304e-08
AT5G40450	AT5G40450.1	Encodes a member of a plant gene family, APK_ORTHOMCL5144,of unknown function. RBB1 is localized to the cytosol and involved in vacuolar biogenesis and organization. RBB1 mutants have increased number of vacuolar bulbs and fewer trans-vacuolar strands.	protein_coding	REGULATOR OF BULB BIOGENESIS1 (RBB1)	REGULATOR OF BULB BIOGENESIS1 (RBB1)	1.06605	8.32796	56.8722	4.65074e-14
AT3G48740	AT3G48740.1	Encodes a member of the SWEET sucrose efflux transporter family proteins.	protein_coding	(SWEET11)	(SWEET11); (AtSWEET11)	1.07657	3.12944	10.5771	0.00114495
AT5G60310	AT5G60310.1	Concanavalin A-like lectin protein kinase family protein;(source:Araport11)	protein_coding	L-TYPE LECTIN RECEPTOR KINASE I.10 (LECRK-I.10)	L-TYPE LECTIN RECEPTOR KINASE I.10 (LECRK-I.10)	1.07737	1.29043	20.115	7.29218e-06
AT3G59830	AT3G59830.1	Integrin-linked protein kinase family;(source:Araport11)	protein_coding			1.07781	0.697292	9.23174	0.00237856
ATCG00490	ATCG00490.1	large subunit of RUBISCO. Protein is tyrosine-phosphorylated and its phosphorylation state is modulated in response to ABA in Arabidopsis thaliana seeds.	protein_coding	(RBCL)	(RBCL)	1.07938	0.855603	10.2205	0.00138888
AT2G16586	AT2G16586.1	transmembrane protein;(source:Araport11)	protein_coding			1.0822	7.0963	16.5842	4.65375e-05
AT1G21310	AT1G21310.1	Encodes extensin 3.	protein_coding	EXTENSIN 3 (EXT3)	EXTENSIN 3 (ATEXT3);EXTENSIN 3 (EXT3);ROOT-SHOOT-HYPOCOTYL DEFECTIVE (RSH)	1.08309	11.7812	116.423	3.84073e-27
AT2G39010	AT2G39010.1	plasma membrane intrinsic protein 2E;(source:Araport11)	protein_coding	PLASMA MEMBRANE INTRINSIC PROTEIN 2E (PIP2E)	PLASMA MEMBRANE INTRINSIC PROTEIN 2;6 (PIP2;6);PLASMA MEMBRANE INTRINSIC PROTEIN 2E (PIP2E)	1.08614	2.58988	10.5782	0.0011443
AT5G57540	AT5G57540.1	Encodes a xyloglucan endotransglucosylase/hydrolase with only only the endotransglucosylase (XET; EC 2.4.1.207) activity towards xyloglucan and non-detectable endohydrolytic (XEH; EC 3.2.1.151) activity.	protein_coding	XYLOGLUCAN ENDOTRANSGLUCOSYLASE/HYDROLASE 13 (XTH13)	(AtXTH13);XYLOGLUCAN ENDOTRANSGLUCOSYLASE/HYDROLASE 13 (XTH13)	1.08764	1.90243	10.7857	0.00102289
AT4G08400	AT4G08400.1	Proline-rich extensin-like family protein;(source:Araport11)	protein_coding	EXTENSIN 7 (EXT7)	EXTENSIN 7 (EXT7)	1.09059	4.64162	37.7253	8.1443e-10
AT5G06630	AT5G06630.1	proline-rich extensin-like family protein;(source:Araport11)	protein_coding	EXTENSIN 9 (EXT9)	EXTENSIN 9 (EXT9)	1.09449	4.43226	41.9929	9.16042e-11
AT4G08410	AT4G08410.1	Proline-rich extensin-like family protein;(source:Araport11)	protein_coding	EXTENSIN 8 (EXT8)	EXTENSIN 8 (EXT8)	1.09577	4.95662	32.714	1.06768e-08
AT3G07273	AT3G07273.1	hypothetical protein;(source:Araport11)	protein_coding			1.09598	2.73187	24.6914	6.72836e-07
AT3G15500	AT3G15500.1	Encodes an ATAF-like NAC-domain transcription factor that doesn't contain C-terminal sequences shared by CUC1, CUC2 and NAM. Note: this protein (AtNAC3) is not to be confused with the protein encoded by locus AT3G29035, which, on occasion, has also been referred to as AtNAC3. The mRNA is cell-to-cell mobile.	protein_coding	NAC DOMAIN CONTAINING PROTEIN 3 (NAC3)	NAC DOMAIN CONTAINING PROTEIN 3 (ATNAC3);NAC DOMAIN CONTAINING PROTEIN 55 (ANAC055); (ANAC55);NAC DOMAIN CONTAINING PROTEIN 3 (NAC3);NAC DOMAIN CONTAINING PROTEIN 55 (NAC055)	1.09964	1.98076	10.8037	0.00101299
AT2G07641	AT2G07641.1	hypothetical protein;(source:Araport11)	protein_coding			1.10103	2.05929	11.9975	0.000532724
AT2G26560	AT2G26560.1	Encodes a lipid acyl hydrolase with wide substrate specificity that accumulates upon infection by fungal and bacterial pathogens. Protein is localized in the cytoplasm in healthy leaves, and in membranes in infected cells. Plays a role in cell death and differentially affects the accumulation of oxylipins. Contributes to resistance to virus.	protein_coding	PHOSPHOLIPASE A 2A (PLA2A)	PHOSPHOLIPASE A 2A (PLP2); (PLAII ALPHA);PHOSPHOLIPASE A 2A (PLA2A);PATATIN-LIKE PROTEIN 2 (PLP2);PHOSPHOLIPASE A 2A (PLA IIA)	1.1111	1.42785	14.2203	0.000162608
AT3G49570	AT3G49570.1	response to low sulfur 3;(source:Araport11)	protein_coding	RESPONSE TO LOW SULFUR 3 (LSU3)	RESPONSE TO LOW SULFUR 3 (LSU3)	1.11701	2.34649	14.3827	0.00014917
ATCG00670	ATCG00670.1	Encodes the only ClpP (caseinolytic protease) encoded within the plastid genome. Contains a highly conserved catalytic triad of Ser-type proteases (Ser-His-Asp). Part of the 350 kDa chloroplast Clp complex. The name reflects nomenclature described in Adam et. al (2001).	protein_coding	PLASTID-ENCODED CLP P (PCLPP)	PLASTID-ENCODED CLP P (PCLPP);CASEINOLYTIC PROTEASE P 1 (CLPP1)	1.12445	0.26655	13.3466	0.000258886
AT5G23660	AT5G23660.1	Encodes a member of the SWEET sucrose efflux transporter family proteins.	protein_coding	(SWEET12)	HOMOLOG OF MEDICAGO TRUNCATULA MTN3 (MTN3); (AtSWEET12); (SWEET12)	1.14637	4.68342	17.1782	3.40319e-05
AT4G14370	AT4G14370.1	Disease resistance protein (TIR-NBS-LRR class) family;(source:Araport11)	protein_coding			1.14741	2.43831	16.2816	5.45928e-05
AT2G20520	AT2G20520.1	fasciclin-like arabinogalactan-protein 6 (Fla6). Possibly involved in embryogenesis and seed development.	protein_coding	FASCICLIN-LIKE ARABINOGALACTAN 6 (FLA6)	FASCICLIN-LIKE ARABINOGALACTAN 6 (FLA6)	1.14941	0.998013	10.1132	0.00147208
AT2G40750	AT2G40750.1	member of WRKY Transcription Factor; Group III. Together with WRKY70 positively regulates SARD1 and CBP60g expression in plant immunity.	protein_coding	WRKY DNA-BINDING PROTEIN 54 (WRKY54)	WRKY DNA-BINDING PROTEIN 54 (WRKY54);WRKY DNA-BINDING PROTEIN 54 (ATWRKY54)	1.15662	1.47885	9.8264	0.00172024
AT4G37050	AT4G37050.1	Patatin-related phospholipase A. Expressed in the floral gynaecium and is induced by abscisic acid (ABA) or phosphate deficiency in roots.	protein_coding	PATATIN-LIKE PROTEIN 4 (PLP4)	PATATIN-LIKE PROTEIN 4 (PLP4);PATATIN-RELATED PHOSPHOLIPASE III BETA (PLAIII{beta});PHOSPHOLIPASE A IVC (AtPLAIVC); (PLA V)	1.1729	0.438815	10.3236	0.00131339
AT1G09750	AT1G09750.1	Eukaryotic aspartyl protease family protein;(source:Araport11)	protein_coding			1.17948	3.8972	53.439	2.66742e-13
AT3G14260	AT3G14260.1	LURP-one-like protein (DUF567);(source:Araport11)	protein_coding			1.19343	2.1071	10.1794	0.0014202
AT5G06640	AT5G06640.1	Proline-rich extensin-like family protein;(source:Araport11)	protein_coding	EXTENSIN 10 (EXT10)	EXTENSIN 10 (EXT10)	1.19668	5.41455	42.2828	7.89831e-11
AT4G09300	AT4G09300.1	LisH and RanBPM domains containing protein;(source:Araport11)	protein_coding			1.19713	1.37368	22.9598	1.65424e-06
ATCG00860	ATCG00860.1	Encodes an unknown protein. This gene is regulated by AtSIG6 transcriptionally.Strong interaction with TIC inner envelope protein translocon which consists of Tic20/Tic56/Tic100/Tic214(Ycf1)(DOI:10.1105/tpc.18.00357).	protein_coding	(YCF2.1)	(YCF2.1)	1.20222	0.126254	8.30578	0.00395191
ATCG01280	ATCG01280.1	Chloroplast Ycf2;(source:Araport11)	protein_coding	(YCF2.2)	(YCF2.2)	1.20222	0.126254	8.30578	0.00395191
ATMG00580	ATMG00580.1	NADH dehydrogenase subunit 4	protein_coding	NADH DEHYDROGENASE SUBUNIT 4 (NAD4)	NADH DEHYDROGENASE SUBUNIT 4 (NAD4)	1.21586	2.15135	8.06698	0.00450791
ATMG00510	ATMG00510.1	NADH dehydrogenase subunit 7	protein_coding	NADH DEHYDROGENASE SUBUNIT 7 (NAD7)	NADH DEHYDROGENASE SUBUNIT 7 (NAD7)	1.2197	2.28991	7.79432	0.00524108
AT1G13480	AT1G13480.1	hypothetical protein (DUF1262);(source:Araport11)	protein_coding			1.22376	1.02119	16.5008	4.86301e-05
AT1G26360	AT1G26360.1	Encodes a protein predicted to act as a carboxylesterase. It has similarity to the SABP2 methyl salicylate esterase from tobacco but no enzymatic activity has been identified for this protein.	protein_coding	METHYL ESTERASE 13 (MES13)	METHYL ESTERASE 13 (MES13);ARABIDOPSIS THALIANA METHYL ESTERASE 13 (ATMES13)	1.2258	0.305546	9.43943	0.0021237
AT4G16990	AT4G16990.2	disease resistance protein (TIR-NBS class);(source:Araport11)	protein_coding	RESISTANCE TO LEPTOSPHAERIA MACULANS 3 (RLM3)	TIR-NBS16 (TN16);RESISTANCE TO LEPTOSPHAERIA MACULANS 3 (RLM3)	1.23006	-0.373095	7.74686	0.00538059
AT1G70760	AT1G70760.1	a subunit of the chloroplast NAD(P)H dehydrogenase complex, involved in PSI cyclic electron transport. Located on the thylakoid membrane. Mutant has impaired NAD(P)H dehydrogenase activity. The mRNA is cell-to-cell mobile.	protein_coding	NADH DEHYDROGENASE-LIKE COMPLEX L (NdhL)	NADH DEHYDROGENASE-LIKE COMPLEX L (NdhL);CHLORORESPIRATORY REDUCTION 23 (CRR23)	1.2431	1.20502	15.6733	7.52799e-05
AT5G47220	AT5G47220.1	Encodes a member of the ERF (ethylene response factor) subfamily B-3 of ERF/AP2 transcription factor family (ATERF-2). The protein contains one AP2 domain. Functions as activator of GCC box?dependent transcription. Positive regulator of JA-responsive defense genes and resistance to F. oxysporum and enhances JA inhibition of root elongation.	protein_coding	ETHYLENE RESPONSIVE ELEMENT BINDING FACTOR 2 (ERF2)	ETHYLENE RESPONSIVE ELEMENT BINDING FACTOR 2 (ERF2);ETHYLENE RESPONSE FACTOR- 2 (ATERF-2);ETHYLENE RESPONSIVE ELEMENT BINDING FACTOR 2 (ATERF2)	1.2598	2.67297	10.4928	0.00119838
AT1G21910	AT1G21910.1	encodes a member of the DREB subfamily A-5 of ERF/AP2 transcription factor family. The protein contains one AP2 domain. There are 15 members in this subfamily including RAP2.1, RAP2.9 and RAP2.10.	protein_coding	DEHYDRATION RESPONSE ELEMENT-BINDING PROTEIN 26 (DREB26)	DEHYDRATION RESPONSE ELEMENT-BINDING PROTEIN 26 (DREB26)	1.27548	2.90598	10.5933	0.00113501
AT4G25810	AT4G25810.1	xyloglucan endotransglycosylase-related protein (XTR6)	protein_coding	XYLOGLUCAN ENDOTRANSGLYCOSYLASE 6 (XTR6)	XYLOGLUCAN ENDOTRANSGLUCOSYLASE/HYDROLASE 23 (XTH23);XYLOGLUCAN ENDOTRANSGLYCOSYLASE 6 (XTR6)	1.27608	3.86643	8.53626	0.00348141
AT4G22690	AT4G22690.1	member of CYP706A The mRNA is cell-to-cell mobile.	protein_coding	CYTOCHROME P450, FAMILY 706, SUBFAMILY A, POLYPEPTIDE 1 (CYP706A1)	CYTOCHROME P450, FAMILY 706, SUBFAMILY A, POLYPEPTIDE 1 (CYP706A1)	1.29896	4.888	9.43013	0.00213449
AT3G17225	AT3G17225.1	Plant invertase/pectin methylesterase inhibitor superfamily protein;(source:Araport11)	protein_coding			1.30881	0.60901	17.8603	2.37726e-05
AT2G24980	AT2G24980.1	Proline-rich extensin-like family protein;(source:Araport11)	protein_coding	EXTENSIN 6 (EXT6)	EXTENSIN 6 (EXT6)	1.30947	4.77348	47.8276	4.65387e-12
ATMG01275	ATMG01275.1	Encodes subunit of mitochondrial NAD(P)H dehydrogenase that is trans-spliced from three precursors. Previously there were three AGI identifiers for the individual trans-spliced sections.	protein_coding	NADH DEHYDROGENASE 1 (NAD1)	NADH DEHYDROGENASE 1 (NAD1);NAD(P)H DEHYDROGENASE 1 (ND1);NADH DEHYDROGENASE 1A (NAD1A);NADH DEHYDROGENASE 1B (NAD1B);NADH DEHYDROGENASE 1C (NAD1C)	1.31592	1.52845	10.7948	0.00101787
AT3G28875	AT3G28875.1	serine/threonine-protein phosphatase 6 regulatory ankyrin repeat subunit C-like protein;(source:Araport11)	protein_coding			1.32964	-0.343285	9.17293	0.00245621
AT4G18205	AT4G18205.1	Nucleotide-sugar transporter family protein;(source:Araport11)	protein_coding	PURINE PERMEASE 21 (PUP21)	PURINE PERMEASE 21 (PUP21); (ATPUP21)	1.35509	3.06636	11.9291	0.000552648
AT5G14920	AT5G14920.1	Encodes a GASA domain containing protein that regulates increases in plant growth through GA-induced and DELLA-dependent signal transduction and that can increase abiotic stress resistance by reducing ROS accumulation.	protein_coding	A-STIMULATED IN ARABIDOPSIS 14 (GASA14)	A-STIMULATED IN ARABIDOPSIS 14 (GASA14)	1.37135	4.40265	35.9755	1.99819e-09
AT1G15125	AT1G15125.1	S-adenosyl-L-methionine-dependent methyltransferases superfamily protein;(source:Araport11)	protein_coding			1.37151	1.31244	11.1021	0.000862292
AT2G02990	AT2G02990.1	Encodes a member of the ribonuclease T2 family that responds to inorganic phosphate starvation, and inhibits production of anthocyanin. Also involved in wound-induced signaling independent of jasmonic acid. Its expression is responsive to both phosphate (Pi) and phosphite (Phi) in roots.	protein_coding	RIBONUCLEASE 1 (RNS1)	RIBONUCLEASE 1 (ATRNS1);RIBONUCLEASE 1 (RNS1)	1.37656	0.516518	13.6663	0.000218338
AT3G48346	AT3G48346.1	This gene encodes a small protein and has either evidence of transcription or purifying selection.	protein_coding			1.38596	-0.472038	9.41667	0.00215022
ATCG00480	ATCG00480.1	chloroplast-encoded gene for beta subunit of ATP synthase	protein_coding	ATP SYNTHASE SUBUNIT BETA (PB)	(CF1BETA);ATP SYNTHASE SUBUNIT BETA (PB); (ATHCF1BETA);ATP SYNTHASE SUBUNIT BETA (ATPB)	1.39642	0.785096	8.70593	0.00317177
AT3G54150	AT3G54150.1	Encodes a DNA methyltransferase required for pollen exine formation and male fertility via the regulation of callose wall and primexine formation.	protein_coding	EXINE FORMATION DEFECTIVE (EFD)	EXINE FORMATION DEFECTIVE (EFD)	1.40248	1.9114	21.0014	4.58953e-06
AT5G52640	AT5G52640.1	Encodes a cytosolic heat shock protein AtHSP90.1. AtHSP90.1 interacts with disease resistance signaling components SGT1b and RAR1 and is required for RPS2-mediated resistance. The mRNA is cell-to-cell mobile.	protein_coding	HEAT SHOCK PROTEIN 90.1 (HSP90.1)	HEAT SHOCK PROTEIN 81-1 (HSP81-1); (ATHS83); (HSP81.1);HEAT SHOCK PROTEIN 90.1 (HSP90.1);HEAT SHOCK PROTEIN 90.1 (ATHSP90.1);HEAT SHOCK PROTEIN 90-1 (AtHsp90-1);HEAT SHOCK PROTEIN 83 (HSP83)	1.413	6.36427	7.82828	0.0051435
AT2G07599	AT2G07599.2	hypothetical protein;(source:Araport11)	protein_coding			1.42488	0.266308	12.2601	0.000462736
AT5G50600	AT5G50600.1	Encodes a hydroxysteroid dehydrogenase shown to act as a NADP+-dependent 11&beta;-,17&beta;-hydroxysteroid dehydrogenase/17&beta;-ketosteroid reductase called HSD1. Two copies of HSD1 (At5g50600 and At5g50700) exist in the Arabidopsis genome as a result of an exact 33-kb duplication on chromosome 5 encompassing seven genes. There are five homologs of HSD1 in Arabidopsis (HSD2-At3g47350, HSD3-At3g…	protein_coding	HYDROXYSTEROID DEHYDROGENASE 1 (HSD1)	HYDROXYSTEROID DEHYDROGENASE 1 (AtHSD1);HYDROXYSTEROID DEHYDROGENASE 1 (HSD1)	1.4283	-1.0211	8.76704	0.00306722
AT3G13950	AT3G13950.1	ankyrin;(source:Araport11)	protein_coding			1.43711	2.08631	54.6138	1.46702e-13
ATMG00560	ATMG00560.1	encodes a mitochondrial ribosomal protein L2, a constituent of the large subunit of the ribosomal complex	protein_coding	(RPL2)	(RPL2)	1.43802	0.204221	10.784	0.00102379
ATMG01190	ATMG01190.1	ATPase subunit 1	protein_coding	ATP SYNTHASE SUBUNIT 1 (ATP1)	ATP SYNTHASE SUBUNIT 1 (ATP1)	1.44795	3.05907	9.61614	0.00192875
AT5G41740	AT5G41740.2	Disease resistance protein (TIR-NBS-LRR class) family;(source:Araport11)	protein_coding			1.45003	2.25107	9.07087	0.00259713
AT5G20230	AT5G20230.1	Encodes a Al-stress-induced gene. Along with TCF, it promotes lignin biosynthesis in response to cold stress. The mRNA is cell-to-cell mobile.	protein_coding	BLUE-COPPER-BINDING PROTEIN (BCB)	BLUE-COPPER-BINDING PROTEIN (ATBCB);BLUE-COPPER-BINDING PROTEIN (BCB);SENESCENCE ASSOCIATED GENE 14 (SAG14);BLUE COPPER BINDING PROTEIN (BCB)	1.46138	2.88812	10.0063	0.00156008
ATCG00360	ATCG00360.1	Encodes a protein required for photosystem I assembly and stability. In Chlamydomonas reinhardtii, this protein seems to act as a PSI specific chaperone facilitating the assembly of the complex by interacting with PsaA and PsaD. A loss of function mutation in tobacco leads to a loss of photosystem I.	protein_coding	(YCF3)	(YCF3)	1.46237	-0.42122	8.62305	0.00331936
AT5G54050	AT5G54050.1	Cysteine/Histidine-rich C1 domain family protein;(source:Araport11)	protein_coding			1.46364	0.298852	11.4473	0.000715964
AT2G07725	AT2G07725.1	Ribosomal L5P family protein;(source:Araport11)	protein_coding			1.48109	2.72551	15.9987	6.33852e-05
ATMG00640	ATMG00640.1	encodes a plant b subunit of mitochondrial ATP synthase based on structural similarity and the presence in the F(0) complex.	protein_coding	(ORF25)	(ORF25)	1.4865	0.115176	12.5009	0.000406758
AT2G15880	AT2G15880.1	Pollen expressed protein required for pollen tube growth.Along with other members of the LRX family, itnteracts with RALF4 to control pollen tube growth and integrity. Loss of function results in premature pollen tube rupture and reduced fertility.	protein_coding	LEUCINE-RICH REPEAT/EXTENSIN 10 (LRX10)	LEUCINE-RICH REPEAT/EXTENSIN 10 (LRX10)	1.49539	5.41727	26.3589	2.83511e-07
AT2G24710	AT2G24710.1	member of Putative ligand-gated ion channel subunit family	protein_coding	GLUTAMATE RECEPTOR 2.3 (GLR2.3)	GLUTAMATE RECEPTOR 2.3 (ATGLR2.3);GLUTAMATE RECEPTOR 2.3 (GLR2.3)	1.49639	-0.880073	12.8196	0.000343014
ATCG00500	ATCG00500.1	Encodes the carboxytransferase beta subunit of the Acetyl-CoA carboxylase (ACCase) complex in plastids. This complex catalyzes the carboxylation of acetyl-CoA to produce malonyl-CoA, the first committed step in fatty acid synthesis.	protein_coding	ACETYL-COA CARBOXYLASE CARBOXYL TRANSFERASE SUBUNIT BETA (ACCD)	ACETYL-COA CARBOXYLASE CARBOXYL TRANSFERASE SUBUNIT BETA (ACCD)	1.54037	0.666511	12.748	0.000356384
AT5G66780	AT5G66780.1	late embryogenesis abundant protein;(source:Araport11)	protein_coding			1.57939	-0.137876	10.4675	0.00121491
AT5G39471	AT5G39471.1	Cysteine/Histidine-rich C1 domain family protein;(source:Araport11)	protein_coding			1.58939	-0.403608	8.35504	0.00384619
ATCG00340	ATCG00340.1	Encodes the D1 subunit of photosystem I reaction center.	protein_coding	(PSAB)	(PSAB)	1.60675	2.23479	12.4287	0.000422788
ATCG00160	ATCG00160.1	Chloroplast ribosomal protein S2	protein_coding	RIBOSOMAL PROTEIN S2 (RPS2)	RIBOSOMAL PROTEIN S2 (RPS2)	1.6115	-0.875244	9.33048	0.00225374
AT1G15840	AT1G15840.1	hypothetical protein;(source:Araport11)	protein_coding			1.62901	-1.07695	13.2456	0.00027322
AT1G16360	AT1G16360.1	LEM3 (ligand-effect modulator 3) family protein / CDC50 family protein;(source:Araport11)	protein_coding			1.63098	-0.704574	8.61482	0.00333439
AT4G09130	AT4G09130.1	RING/U-box superfamily protein;(source:Araport11)	protein_coding	ARABIDOPSIS T??XICOS EN LEVADURA 37 (ATL37)	ARABIDOPSIS T??XICOS EN LEVADURA 37 (ATL37)	1.63783	-1.16291	8.30653	0.00395029
ATMG00520	ATMG00520.1	Intron maturase, type II family protein;(source:Araport11)	protein_coding	(MATR)	(MATR)	1.65685	2.4964	12.6073	0.000384247
AT3G54530	AT3G54530.1	hypothetical protein;(source:Araport11)	protein_coding			1.6795	-1.01967	8.06965	0.00450127
ATCG01050	ATCG01050.1	Represents a plastid-encoded subunit of a NAD(P)H dehydrogenase complex. Its mRNA is edited at four positions. Translation data is not available for this gene.	protein_coding	(NDHD)	(NDHD)	1.6864	-0.586491	7.84246	0.00510332
AT4G38070	AT4G38070.1	transcription factor bHLH131-like protein;(source:Araport11)	protein_coding			1.70134	-0.715374	13.1958	0.000280573
AT2G07727	AT2G07727.1	cytochrome b;(source:Araport11)	protein_coding			1.70519	3.77768	13.5284	0.000234984
ATCG00720	ATCG00720.1	Encodes the cytochrome b(6) subunit of the cytochrome b6f complex.	protein_coding	PHOTOSYNTHETIC ELECTRON TRANSFER B (PETB)	PHOTOSYNTHETIC ELECTRON TRANSFER B (PETB)	1.72481	0.30771	9.33276	0.00225093
AT4G18197	AT4G18197.1	Member of a family of proteins related to PUP1, a purine transporter. May be involved in the transport of purine and purine derivatives such as cytokinins, across the plasma membrane. The mRNA is cell-to-cell mobile.	protein_coding	PURINE PERMEASE 7 (PUP7)	ARABIDOPSIS THALIANA PURINE PERMEASE 7 (ATPUP7);PURINE PERMEASE 7 (PUP7);PEROXIN 17 (PEX17)	1.73726	3.07817	12.4112	0.000426772
ATCG00730	ATCG00730.1	A chloroplast gene encoding subunit IV of the cytochrome b6/f complex	protein_coding	PHOTOSYNTHETIC ELECTRON TRANSFER D (PETD)	PHOTOSYNTHETIC ELECTRON TRANSFER D (PETD)	1.73761	-0.433502	12.3959	0.000430272
ATCG00800	ATCG00800.1	encodes a chloroplast ribosomal protein S3, a constituent of the small subunit of the ribosomal complex	protein_coding	RESISTANCE TO PSEUDOMONAS SYRINGAE 3 (RPS3)		1.74377	0.436747	14.1555	0.000168306
AT5G38420	AT5G38420.1	Encodes a member of the Rubisco small subunit (RBCS) multigene family: RBCS1A (At1g67090), RBCS1B (At5g38430), RBCS2B (At5g38420), and RBCS3B (At5g38410). Activated by OXS2 under the treatment of salt.	protein_coding	RUBISCO SMALL SUBUNIT 2B (RBCS2B)	(DEG24);RUBISCO SMALL SUBUNIT 2B (RBCS2B)	1.75499	1.06057	8.58442	0.00339052
ATCG00350	ATCG00350.1	Encodes psaA protein comprising the reaction center for photosystem I along with psaB protein; hydrophobic protein encoded by the chloroplast genome.	protein_coding	(PSAA)	(PSAA)	1.7736	2.28767	10.4607	0.00121941
ATCG00530	ATCG00530.1	CemA-like proton extrusion protein-like protein;(source:Araport11)	protein_coding	(YCF10)	(YCF10)	1.78351	0.00220942	16.8545	4.03566e-05
AT1G61080	AT1G61080.1	Hydroxyproline-rich glycoprotein family protein;(source:Araport11)	protein_coding			1.78621	-0.685414	10.3002	0.00133016
AT2G32140	AT2G32140.1	transmembrane receptor;(source:Araport11)	protein_coding			1.80209	0.0596119	8.19098	0.00420991
AT3G16530	AT3G16530.1	Lectin like protein whose expression is induced upon treatment with chitin oligomers.	protein_coding			1.81024	2.77286	38.1036	6.70847e-10
AT4G37220	AT4G37220.1	Cold acclimation protein WCOR413 family;(source:Araport11)	protein_coding			1.82719	1.83364	38.7233	4.88334e-10
ATCG00650	ATCG00650.1	chloroplast-encoded ribosomal protein S18	protein_coding	RIBOSOMAL PROTEIN S18 (RPS18)	RIBOSOMAL PROTEIN S18 (RPS18)	1.90322	-1.37888	9.30727	0.00228246
ATCG00520	ATCG00520.1	Encodes a protein required for photosystem I assembly and stability. In cyanobacteria, loss of function mutation in this gene increases PSII/PSI ratio without any influence on photoautotrophic growth.	protein_coding	(YCF4)	(YCF4)	1.94039	0.0531069	11.4103	0.000730373
AT3G46230	AT3G46230.1	Member of the class I small heat-shock protein (sHSP) family, which accounts for the majority of sHSPs in maturing seeds.Induced by heat, cold, salt, drought and high-light.	protein_coding	HEAT SHOCK PROTEIN 17.4 (HSP17.4)	ARABIDOPSIS THALIANA HEAT SHOCK PROTEIN 17.4 (ATHSP17.4);HEAT SHOCK PROTEIN 17.4 (HSP17.4)	1.95357	1.35707	18.265	1.92204e-05
AT4G30270	AT4G30270.1	encodes a protein similar to endo xyloglucan transferase in sequence. It is also very similar to BRU1 in soybean, which is involved in brassinosteroid response.	protein_coding	XYLOGLUCAN ENDOTRANSGLUCOSYLASE/HYDROLASE 24 (XTH24)	MERISTEM-5 (MERI5B);SENESCENCE 4 (SEN4);XYLOGLUCAN ENDOTRANSGLUCOSYLASE/HYDROLASE 24 (XTH24);MERISTEM 5 (MERI-5)	1.96508	5.91391	53.8021	2.21734e-13
AT2G07835	AT2G07835.1	hypothetical protein;(source:Araport11)	protein_coding			1.96515	0.0985937	9.20624	0.00241192
ATCG00790	ATCG00790.1	chloroplast gene encoding a ribosomal protein L16, which is a constituent of 50S large ribosomal subunit	protein_coding	RIBOSOMAL PROTEIN L16 (RPL16)	RIBOSOMAL PROTEIN L16 (RPL16)	2.07933	1.07798	28.6222	8.79685e-08
AT1G65390	AT1G65390.1	Phloem Protein2 family gene encoding a two-domain protein containing predicted lectin and Toll/Interleukin-1 receptor domains, which is induced upon spider mite attack and improves the ability to defend against T. urticae by participating in the tight regulation of hormonal cross talk upon mite feeding.	protein_coding	PHLOEM PROTEIN 2 A5 (PP2-A5)	PHLOEM PROTEIN 2 A5 (PP2-A5);PHLOEM PROTEIN 2 A5 (ATPP2-A5)	2.09747	-0.676527	7.71876	0.005465
ATCG00660	ATCG00660.1	encodes a chloroplast ribosomal protein L20, a constituent of the large subunit of the ribosomal complex	protein_coding	RIBOSOMAL PROTEIN L20 (RPL20)	RIBOSOMAL PROTEIN L20 (RPL20)	2.13002	-0.817268	20.0738	7.45095e-06
ATCG00040	ATCG00040.1	Encodes a maturase located in the trnK intron in the chloroplast genome.	protein_coding	MATURASE K (MATK)	MATURASE K (MATK)	2.15857	0.810501	16.9264	3.88579e-05
AT5G26080	AT5G26080.1	proline-rich family protein;(source:Araport11)	protein_coding			2.15922	-1.11555	10.7136	0.0010635
ATCG01080	ATCG01080.1	NADH dehydrogenase ND6	protein_coding	(NDHG)	(NDHG)	2.26689	-1.81723	15.0205	0.000106348
ATCG00740	ATCG00740.1	RNA polymerase alpha subunit	protein_coding	RNA POLYMERASE SUBUNIT ALPHA (RPOA)	RNA POLYMERASE SUBUNIT ALPHA (RPOA)	2.29112	0.750733	16.3263	5.33202e-05
AT5G07572	AT5G07572.1	hypothetical protein;(source:Araport11)	protein_coding			2.32698	-1.02728	14.6353	0.000130449
ATCG00770	ATCG00770.1	chloroplast 30S ribosomal protein S8	protein_coding	RIBOSOMAL PROTEIN S8 (RPS8)	RIBOSOMAL PROTEIN S8 (RPS8)	2.33683	0.280417	12.4969	0.000407638
AT1G32575	AT1G32575.1	hypothetical protein;(source:Araport11)	protein_coding			2.38881	-1.13637	15.5638	7.97669e-05
ATCG00540	ATCG00540.1	Encodes cytochrome f apoprotein; involved in photosynthetic electron transport chain; encoded by the chloroplast genome and is transcriptionally repressed by a nuclear gene HCF2.	protein_coding	PHOTOSYNTHETIC ELECTRON TRANSFER A (PETA)	PHOTOSYNTHETIC ELECTRON TRANSFER A (PETA)	2.46833	0.382438	11.9781	0.00053829
AT2G31220	AT2G31220.1	Encodes a bHLH transcription factor that together with bHLH089 and bHLH091 is important for the normal transcriptome of the developing Arabidopsis anther, possibly by forming a feed-forward loop with DYT1.	protein_coding	BASIC HELIX LOOP HELIX PROTEIN 10 (BHLH010)	BASIC HELIX LOOP HELIX PROTEIN 10 (BHLH010)	2.63655	-1.39726	8.81018	0.00299554
AT3G15670	AT3G15670.1	Late embryogenesis abundant protein (LEA) family protein;(source:Araport11)	protein_coding	LATE EMBRYOGENESIS ACCUMULATING 76 (LEA76)	(LEA29);LATE EMBRYOGENESIS ACCUMULATING 76 (LEA76)	2.69692	-1.06687	11.8353	0.000581185
ATCG01110	ATCG01110.1	Encodes the 49KDa plastid NAD(P)H dehydrogenase subunit H protein. Its transcription is regulated by an ndhF-specific plastid sigma factor, SIG4.	protein_coding	NAD(P)H DEHYDROGENASE SUBUNIT H (NDHH)	NAD(P)H DEHYDROGENASE SUBUNIT H (NDHH)	2.73568	-0.868541	17.5885	2.74248e-05
AT1G21313	AT1G21313.1	transmembrane protein;(source:Araport11)	protein_coding			2.74906	-0.103321	7.87348	0.00501651
ATCG00780	ATCG00780.1	encodes a chloroplast ribosomal protein L14, a constituent of the large subunit of the ribosomal complex	protein_coding	RIBOSOMAL PROTEIN L14 (RPL14)	RIBOSOMAL PROTEIN L14 (RPL14)	2.75744	0.462558	20.8855	4.87569e-06
AT5G07570	AT5G07570.1	glycine/proline-rich protein;(source:Araport11)	protein_coding			2.80981	0.510187	25.3334	4.82283e-07
AT3G53530	AT3G53530.2	Chloroplast-targeted copper chaperone protein;(source:Araport11)	protein_coding	SODIUM POTASSIUM ROOT DEFECTIVE 3 (NAKR3)	HEAVY METAL ASSOCIATED PROTEIN 30 (ATHMP30);SODIUM POTASSIUM ROOT DEFECTIVE 3 (NAKR3)	2.81806	-0.441761	10.2056	0.00140017
AT5G51585	AT5G51585.1	transmembrane protein;(source:Araport11)	protein_coding			5.63996	-0.868562	19.4785	1.01739e-05
AT5G50580	AT5G50580.2	Encodes one of the two subunits of the SUMO activation enzyme required during sumolation. Sumolation is a post-translational protein modification process similar to ubiquitination during which a polypeptide (SUMO) is covalently attached to a target protein.	protein_coding	SUMO-ACTIVATING ENZYME 1B (SAE1B)	(AT-SAE1-2);SUMO-ACTIVATING ENZYME 1B (SAE1B)	7.5922	0.762415	23.8475	1.04279e-06
AT1G55335	AT1G55335.1	transmembrane protein;(source:Araport11)	protein_coding			12.0114	2.59912	411.272	1.93753e-91

## Sheet: S4 Root +Ti vs Ctrl Down 10D
Locus Identifier	Gene Model Name	Gene Model Description	Gene Model Type	Primary Gene Symbol	All Gene Symbols	logFC	logCPM	LR	PValue
AT3G49330	AT3G49330.1	Plant invertase/pectin methylesterase inhibitor superfamily protein;(source:Araport11)	protein_coding			-0.54455	3.46847	7.72414	0.00544873
AT5G10130	AT5G10130.1	Pollen Ole e 1 allergen and extensin family protein;(source:Araport11)	protein_coding			-0.728915	5.40486	7.73952	0.00540251
AT5G02550	AT5G02550.1	hypothetical protein;(source:Araport11)	protein_coding			-0.377363	3.4623	7.74798	0.00537728
AT4G25740	AT4G25740.1	RNA binding Plectin/S10 domain-containing protein;(source:Araport11)	protein_coding			-0.303471	7.03975	7.75129	0.00536741
AT4G33160	AT4G33160.1	F-box family protein;(source:Araport11)	protein_coding			-0.365517	3.72828	7.75565	0.00535447
AT3G09200	AT3G09200.1	Ribosomal protein L10 family protein;(source:Araport11)	protein_coding			-0.301726	9.33709	7.77957	0.00528405
AT2G33370	AT2G33370.1	Ribosomal protein L14p/L23e family protein;(source:Araport11)	protein_coding			-0.271507	7.08776	7.79533	0.00523813
AT2G34320	AT2G34320.1	Polynucleotidyl transferase, ribonuclease H-like superfamily protein;(source:Araport11)	protein_coding			-1.14575	-1.09256	7.8113	0.00519205
AT5G05990	AT5G05990.1	Mitochondrial glycoprotein family protein;(source:Araport11)	protein_coding			-0.476345	3.38536	7.83139	0.00513467
AT3G57787	AT3G57787.1	hypothetical protein;(source:Araport11)	protein_coding			-1.82209	-1.36325	7.83758	0.00511711
AT1G54095	AT1G54095.1	DUF1677 family protein, putative (DUF1677);(source:Araport11)	protein_coding			-0.570865	4.08961	7.85332	0.00507275
AT5G59970	AT5G59970.1	Histone superfamily protein;(source:Araport11)	protein_coding			-0.511477	5.33102	7.85535	0.00506705
AT3G06640	AT3G06640.1	PAS domain-containing protein tyrosine kinase family protein;(source:Araport11)	protein_coding			-1.50912	-0.47809	7.85756	0.00506087
AT1G54500	AT1G54500.1	RBD1 is a thylakoid membrane-bound iron-binding protein that is required for the proper assembly of photosystem II in Arabidopsis. It is found in all oxygenic photoautotrophic organisms (plants, algae and cyanobacteria).	protein_coding			-0.334515	4.04425	7.86884	0.00502939
AT2G40290	AT2G40290.1	Encodes an eIF2alpha homolog that can be phosphorylated by GCN2 in vitro.	protein_coding			-0.284097	6.37979	7.87164	0.0050216
AT2G20390	AT2G20390.2	cytochrome oxidase complex assembly protein;(source:Araport11)	protein_coding			-0.275495	4.55411	7.87368	0.00501593
AT3G61400	AT3G61400.1	1-aminocyclopropane-1-carboxylate oxidase-like protein	protein_coding			-1.33268	1.45353	7.88079	0.00499627
AT2G17830	AT2G17830.1	F-box and associated interaction domains-containing protein;(source:Araport11)	protein_coding			-0.696271	1.39654	7.92673	0.00487097
AT1G27400	AT1G27400.1	Ribosomal protein L22p/L17e family protein;(source:Araport11)	protein_coding			-0.264985	7.69789	7.93652	0.0048447
AT1G66250	AT1G66250.1	O-Glycosyl hydrolases family 17 protein;(source:Araport11)	protein_coding			-0.362032	4.09673	7.93859	0.00483916
AT1G75670	AT1G75670.1	DNA-directed RNA polymerase;(source:Araport11)	protein_coding			-0.449378	3.88853	7.94285	0.00482776
AT5G20290	AT5G20290.1	Ribosomal protein S8e family protein;(source:Araport11)	protein_coding			-0.257831	9.83634	7.9441	0.00482444
AT1G07210	AT1G07210.1	Ribosomal protein S18;(source:Araport11)	protein_coding			-0.303377	5.68067	7.9566	0.00479122
AT2G26680	AT2G26680.1	FkbM family methyltransferase;(source:Araport11)	protein_coding			-0.318156	4.46192	7.96802	0.00476111
AT3G61870	AT3G61870.1	plant/protein;(source:Araport11)	protein_coding			-0.516663	3.8304	7.98588	0.00471436
AT1G03495	AT1G03495.1	HXXXD-type acyl-transferase family protein;(source:Araport11)	protein_coding			-0.466047	2.72457	7.99469	0.00469147
AT5G39150	AT5G39150.1	RmlC-like cupins superfamily protein;(source:Araport11)	protein_coding			-1.38544	-0.969426	8.01574	0.00463726
AT3G18240	AT3G18240.1	Ribosomal protein S24/S35;(source:Araport11)	protein_coding			-0.429157	4.79277	8.04246	0.00456934
AT5G66540	AT5G66540.1	U3 small nucleolar ribonucleoprotein;(source:Araport11)	protein_coding			-0.406517	5.1476	8.05314	0.00454248
AT3G59670	AT3G59670.1	elongation factor;(source:Araport11)	protein_coding			-0.426834	5.37256	8.10026	0.0044259
AT1G16830	AT1G16830.1	Pentatricopeptide repeat (PPR) superfamily protein;(source:Araport11)	protein_coding			-0.661475	1.6762	8.11688	0.00438549
AT1G30240	AT1G30240.2	proline-, glutamic acid/leucine-rich protein;(source:Araport11)	protein_coding			-0.403096	4.05567	8.12887	0.0043566
AT1G70600	AT1G70600.1	Ribosomal protein L18e/L15 superfamily protein;(source:Araport11)	protein_coding			-0.299086	7.51995	8.1583	0.00428645
AT3G62580	AT3G62580.1	Late embryogenesis abundant protein (LEA) family protein;(source:Araport11)	protein_coding			-0.324353	6.42863	8.16052	0.00428121
AT3G05060	AT3G05060.1	SAR DNA-binding protein, putative, strong similarity to SAR DNA-binding protein-1 (Pisum sativum) GI:3132696; contains Pfam profile PF01798: Putative snoRNA binding domain; encodes NOP58-like protein	protein_coding			-0.347162	7.00223	8.19504	0.00420051
AT1G73620	AT1G73620.1	Pathogenesis-related thaumatin superfamily protein;(source:Araport11)	protein_coding			-0.458634	5.07479	8.20339	0.00418121
AT5G38020	AT5G38020.1	encodes a protein whose sequence is similar to SAM:salicylic acid carboxyl methyltransferase (SAMT) (GI:6002712)(Clarkia breweri) and to SAM:benzoic acid carboxyl methyltransferase (BAMT)(GI:9789277)(Antirrhinum majus). SABATH family methyltransferase.	protein_coding			-0.499334	7.08223	8.20579	0.0041757
AT5G65880	AT5G65880.1	transmembrane protein;(source:Araport11)	protein_coding			-0.456977	3.03797	8.2214	0.00413993
AT3G46845	AT3G46845.1	hypothetical protein;(source:Araport11)	protein_coding			-0.273477	4.56716	8.22498	0.00413176
AT1G49245	AT1G49245.1	Prefoldin chaperone subunit family protein;(source:Araport11)	protein_coding			-0.418225	2.95964	8.22836	0.00412407
AT3G54085	AT3G54085.1	Yos1-like protein;(source:Araport11)	protein_coding			-0.487748	3.73148	8.24911	0.00407719
AT2G44670	AT2G44670.1	senescence-associated family protein (DUF581);(source:Araport11)	protein_coding			-0.460808	6.41239	8.28078	0.0040067
AT2G42710	AT2G42710.1	Ribosomal protein L1p/L10e family;(source:Araport11)	protein_coding			-0.372213	5.15035	8.30349	0.0039569
AT1G14180	AT1G14180.1	RING/U-box superfamily protein;(source:Araport11)	protein_coding			-0.480778	2.72269	8.3151	0.00393169
AT3G45730	AT3G45730.1	hypothetical protein;(source:Araport11)	protein_coding			-0.425159	4.24124	8.33229	0.00389466
AT4G26288	AT4G26288.1	hypothetical protein;(source:Araport11)	protein_coding			-0.723751	1.07992	8.33404	0.0038909
AT3G60770	AT3G60770.1	Ribosomal protein S13/S15;(source:Araport11)	protein_coding			-0.334335	7.93978	8.34242	0.003873
AT3G04230	AT3G04230.1	Ribosomal protein S5 domain 2-like superfamily protein;(source:Araport11)	protein_coding			-0.41292	5.00794	8.38373	0.00378594
AT1G05835	AT1G05835.1	PhD finger protein.	protein_coding			-0.772111	0.738977	8.4087	0.0037343
AT3G51140	AT3G51140.1	DnaJ (DUF3353);(source:Araport11)	protein_coding			-0.35561	4.52743	8.42927	0.00369228
AT1G08610	AT1G08610.1	Pentatricopeptide repeat (PPR) superfamily protein;(source:Araport11)	protein_coding			-0.493693	2.8126	8.45096	0.00364851
AT1G26520	AT1G26520.1	Cobalamin biosynthesis CobW-like protein;(source:Araport11)	protein_coding			-0.39125	3.29893	8.45182	0.00364679
AT4G14420	AT4G14420.1	HR-like lesion-inducing protein-like protein;(source:Araport11)	protein_coding			-0.350015	6.43799	8.46428	0.00362189
AT4G13070	AT4G13070.1	RNA-binding CRS1 / YhbY (CRM) domain protein;(source:Araport11)	protein_coding			-0.523952	2.78002	8.46652	0.00361743
AT1G01225	AT1G01225.1	NC domain-containing protein-like protein;(source:Araport11)	protein_coding			-0.462477	2.57772	8.46899	0.00361251
AT3G01790	AT3G01790.1	Ribosomal protein L13 family protein;(source:Araport11)	protein_coding			-0.28659	5.98679	8.47639	0.00359784
AT1G48570	AT1G48570.1	zinc finger (Ran-binding) family protein;(source:Araport11)	protein_coding			-0.415319	4.38213	8.48215	0.00358647
AT4G16610	AT4G16610.1	C2H2-like zinc finger protein;(source:Araport11)	protein_coding			-0.762146	1.41865	8.48629	0.00357833
AT1G60080	AT1G60080.1	3-5-exoribonuclease family protein;(source:Araport11)	protein_coding			-0.414996	3.69821	8.5071	0.00353763
AT2G43460	AT2G43460.1	Ribosomal L38e protein family;(source:Araport11)	protein_coding			-0.313595	7.92093	8.52457	0.00350384
AT1G77610	AT1G77610.1	EamA-like transporter family protein;(source:Araport11)	protein_coding			-0.351354	5.72716	8.53736	0.00347929
AT1G53640	AT1G53640.1	transmembrane protein;(source:Araport11)	protein_coding			-0.515628	3.93573	8.56123	0.00343397
AT5G05240	AT5G05240.1	cation-transporting ATPase;(source:Araport11)	protein_coding			-0.474635	3.02506	8.56431	0.00342817
AT3G53430	AT3G53430.1	Ribosomal protein L11 family protein;(source:Araport11)	protein_coding			-0.346999	8.11725	8.56759	0.003422
AT3G18760	AT3G18760.1	Translation elongation factor EF1B/ribosomal protein S6 family protein;(source:Araport11)	protein_coding			-0.366692	4.39243	8.58532	0.00338884
AT3G51642	AT3G51642.1	This gene encodes a small protein and has either evidence of transcription or purifying selection.	protein_coding			-0.378909	4.19316	8.59641	0.00336825
AT1G73630	AT1G73630.1	EF hand calcium-binding protein family;(source:Araport11)	protein_coding			-0.535083	3.77409	8.60884	0.00334534
AT1G58983	AT1G58983.1	Ribosomal protein S5 family protein;(source:Araport11)	protein_coding			-0.365615	9.38364	8.62933	0.00330793
AT5G53620	AT5G53620.1	RNA polymerase II degradation factor;(source:Araport11)	protein_coding			-0.308082	5.79146	8.64803	0.00327415
AT5G42110	AT5G42110.1	hypothetical protein;(source:Araport11)	protein_coding			-0.528711	2.95972	8.65256	0.00326603
AT5G11900	AT5G11900.1	Translation initiation factor SUI1 family protein;(source:Araport11)	protein_coding			-0.313678	5.14968	8.67481	0.00322638
AT5G54855	AT5G54855.1	Pollen Ole e 1 allergen and extensin family protein;(source:Araport11)	protein_coding			-0.308428	5.06537	8.68935	0.00320076
AT3G11070	AT3G11070.1	Outer membrane OMP85 family protein;(source:Araport11)	protein_coding			-0.326285	5.13327	8.70753	0.00316898
AT2G48090	AT2G48090.1	hypothetical protein;(source:Araport11)	protein_coding			-0.657084	3.13568	8.7129	0.00315967
AT3G57220	AT3G57220.1	Glycosyl transferase family 4 protein;(source:Araport11)	protein_coding			-0.331623	4.42933	8.72594	0.00313714
AT5G11420	AT5G11420.1	Encodes a DUF642 cell wall protein.	protein_coding			-0.655031	3.80994	8.75505	0.00308745
AT1G77750	AT1G77750.1	Ribosomal protein S13/S18 family;(source:Araport11)	protein_coding			-0.444522	4.78783	8.80576	0.0030028
AT4G28310	AT4G28310.1	microtubule-associated protein;(source:Araport11)	protein_coding			-0.771167	3.081	8.81542	0.00298695
AT2G26100	AT2G26100.1	Galactosyltransferase family protein;(source:Araport11)	protein_coding			-0.385946	4.02043	8.82106	0.00297773
AT5G55610	AT5G55610.1	isopentenyl-diphosphate delta-isomerase;(source:Araport11)	protein_coding			-0.285152	5.66907	8.8365	0.00295265
AT5G67220	AT5G67220.1	FMN-linked oxidoreductases superfamily protein;(source:Araport11)	protein_coding			-0.282263	6.00138	8.85312	0.00292589
AT5G09270	AT5G09270.1	transmembrane protein;(source:Araport11)	protein_coding			-0.508922	3.03701	8.86674	0.00290414
AT3G59070	AT3G59070.1	Cytochrome b561/ferric reductase transmembrane with DOMON related domain-containing protein;(source:Araport11)	protein_coding			-1.47596	-0.260139	8.86939	0.00289992
AT2G36145	AT2G36145.1	hypothetical protein;(source:Araport11)	protein_coding			-0.788415	1.92301	8.87341	0.00289355
AT5G15200	AT5G15200.1	Ribosomal protein S4;(source:Araport11)	protein_coding			-0.285981	9.25291	8.88128	0.00288109
AT3G06040	AT3G06040.1	Ribosomal protein L12/ ATP-dependent Clp protease adaptor protein ClpS family protein;(source:Araport11)	protein_coding			-0.327999	5.72414	8.88299	0.0028784
AT1G72020	AT1G72020.1	TonB-dependent heme receptor A;(source:Araport11)	protein_coding			-0.317787	7.34072	8.89175	0.00286462
AT1G71430	AT1G71430.1	hypothetical protein;(source:Araport11)	protein_coding			-0.478971	3.96002	8.90536	0.00284334
AT1G07840	AT1G07840.2	Sas10/Utp3/C1D family;(source:Araport11)	protein_coding			-0.310066	4.69341	8.90648	0.0028416
AT1G29880	AT1G29880.1	glycyl-tRNA synthetase / glycine-tRNA ligase;(source:Araport11)	protein_coding		CELLULOSE SYNTHASE LIKE C12 (CLSC12)	-0.324151	6.6333	8.91234	0.00283251
AT3G22530	AT3G22530.1	heat shock protein;(source:Araport11)	protein_coding			-0.703195	3.34026	8.93745	0.00279383
AT1G12000	AT1G12000.1	Phosphofructokinase family protein;(source:Araport11)	protein_coding			-0.365753	7.88598	8.94169	0.00278734
AT1G52600	AT1G52600.1	Peptidase S24/S26A/S26B/S26C family protein;(source:Araport11)	protein_coding			-0.320068	5.17984	8.94821	0.00277741
AT5G54910	AT5G54910.1	DEA(D/H)-box RNA helicase family protein;(source:Araport11)	protein_coding			-0.448982	4.40086	8.97017	0.00274424
AT1G71210	AT1G71210.1	Pentatricopeptide repeat (PPR) superfamily protein;(source:Araport11)	protein_coding			-0.381997	4.30861	8.9738	0.00273878
AT2G22100	AT2G22100.1	RNA-binding (RRM/RBD/RNP motifs) family protein;(source:Araport11)	protein_coding			-0.424448	3.62026	8.98787	0.00271777
AT1G47278	AT1G47278.2	hypothetical protein;(source:Araport11)	protein_coding			-0.360758	4.55865	8.99932	0.0027008
AT5G50460	AT5G50460.1	secE/sec61-gamma protein transport protein;(source:Araport11)	protein_coding			-0.386749	6.32728	9.00203	0.0026968
AT5G47930	AT5G47930.1	Zinc-binding ribosomal protein family protein;(source:Araport11)	protein_coding			-0.34418	7.56262	9.00884	0.00268677
AT3G07290	AT3G07290.1	Pentatricopeptide repeat (PPR) superfamily protein;(source:Araport11)	protein_coding			-0.695071	1.73631	9.02766	0.00265924
AT4G37190	AT4G37190.1	plasma membrane, autoregulation-binding site, misato segment II, myosin-like, tubulin/FtsZ protein;(source:Araport11)	protein_coding			-0.321322	4.80488	9.03779	0.00264455
AT1G27435	AT1G27435.1	hypothetical protein;(source:Araport11)	protein_coding			-0.31803	5.46536	9.04473	0.00263454
AT3G17940	AT3G17940.1	Galactose mutarotase-like superfamily protein;(source:Araport11)	protein_coding			-0.260867	6.06824	9.04744	0.00263063
AT1G45163	AT1G45163.1	transmembrane protein;(source:Araport11)	protein_coding			-1.77204	-0.172226	9.0575	0.00261619
AT4G02930	AT4G02930.1	GTP binding Elongation factor Tu family protein;(source:Araport11)	protein_coding			-0.408586	7.35093	9.06653	0.0026033
AT1G64490	AT1G64490.1	DEK, chromatin associated protein;(source:Araport11)	protein_coding			-0.438797	3.95442	9.06815	0.002601
AT1G26460	AT1G26460.1	Tetratricopeptide repeat (TPR)-like superfamily protein;(source:Araport11)	protein_coding			-0.388611	5.90522	9.07929	0.0025852
AT1G73650	AT1G73650.3	3-oxo-5-alpha-steroid 4-dehydrogenase (DUF1295);(source:Araport11)	protein_coding			-0.461018	5.92933	9.08181	0.00258164
AT4G26230	AT4G26230.1	Ribosomal protein L31e family protein;(source:Araport11)	protein_coding			-0.332606	7.06016	9.09265	0.00256638
AT2G22080	AT2G22080.1	transmembrane protein;(source:Araport11)	protein_coding			-0.390485	6.33484	9.09943	0.00255689
AT1G75550	AT1G75550.1	glycine-rich protein;(source:Araport11)	protein_coding			-0.763164	1.24795	9.10052	0.00255536
AT4G29930	AT4G29930.3	basic helix-loop-helix (bHLH) DNA-binding superfamily protein;(source:Araport11)	protein_coding			-0.757994	4.3386	9.17132	0.00245838
AT1G04590	AT1G04590.2	PPR containing-like protein;(source:Araport11)	protein_coding			-0.340994	4.63126	9.1833	0.00244233
AT3G21600	AT3G21600.1	Senescence/dehydration-associated protein-like protein;(source:Araport11)	protein_coding			-0.614232	4.68431	9.18796	0.00243612
AT1G55205	AT1G55205.2	hypothetical protein;(source:Araport11)	protein_coding			-0.708241	2.40806	9.20582	0.00241247
AT5G15265	AT5G15265.1	transmembrane protein;(source:Araport11)	protein_coding			-0.435944	3.43015	9.21795	0.00239654
AT3G14740	AT3G14740.2	RING/FYVE/PHD zinc finger superfamily protein;(source:Araport11)	protein_coding			-0.624645	3.03184	9.22701	0.00238471
AT4G33550	AT4G33550.1	Bifunctional inhibitor/lipid-transfer protein/seed storage 2S albumin superfamily protein;(source:Araport11)	protein_coding			-0.864158	5.05424	9.22718	0.00238449
AT1G03250	AT1G03250.2	R3H domain protein involved in ribosome biogenesis.	protein_coding			-0.345579	4.555	9.2441	0.00236255
AT5G15700	AT5G15700.2	Nucleus encoded plastid RNA polymerase. Localized in mitochondria and chloroplast.	protein_coding			-0.450454	4.60947	9.26274	0.00233862
AT4G08520	AT4G08520.1	SNARE-like superfamily protein;(source:Araport11)	protein_coding			-0.319875	6.20135	9.28319	0.00231267
AT5G46160	AT5G46160.1	Ribosomal protein L14p/L23e family protein;(source:Araport11)	protein_coding			-0.312757	4.56049	9.28526	0.00231005
AT4G24440	AT4G24440.1	transcription initiation factor IIA gamma chain / TFIIA-gamma (TFIIA-S);(source:Araport11)	protein_coding			-0.302035	5.18411	9.29047	0.00230349
AT1G73780	AT1G73780.1	Bifunctional inhibitor/lipid-transfer protein/seed storage 2S albumin superfamily protein;(source:Araport11)	protein_coding			-1.2872	0.64426	9.30779	0.00228181
AT3G56270	AT3G56270.1	WEB family protein (DUF827);(source:Araport11)	protein_coding			-0.554675	2.78639	9.33693	0.00224581
AT2G09990	AT2G09990.1	Ribosomal protein S5 domain 2-like superfamily protein;(source:Araport11)	protein_coding			-0.358498	6.91486	9.35068	0.00222902
AT5G62290	AT5G62290.1	nucleotide-sensitive chloride conductance regulator (ICln) family protein;(source:Araport11)	protein_coding			-0.414059	4.05778	9.36431	0.00221251
AT4G12270	AT4G12270.1	Copper amine oxidase family protein;(source:Araport11)	protein_coding			-0.62928	2.74046	9.38009	0.00219355
AT3G60660	AT3G60660.1	spindle/kinetochore-associated-like protein;(source:Araport11)	protein_coding			-0.722787	1.97245	9.41403	0.00215331
AT1G18440	AT1G18440.1	Peptidyl-tRNA hydrolase family protein;(source:Araport11)	protein_coding			-0.463064	3.11794	9.44208	0.00212062
AT5G15320	AT5G15320.1	ATP synthase E chain;(source:Araport11)	protein_coding			-0.323688	5.99227	9.46694	0.00209208
AT5G41050	AT5G41050.1	Pollen Ole e 1 allergen and extensin family protein;(source:Araport11)	protein_coding			-0.803422	1.47751	9.4798	0.00207746
AT4G12700	AT4G12700.1	calcium ion-binding protein;(source:Araport11)	protein_coding			-0.361886	4.05098	9.48294	0.00207392
AT5G10920	AT5G10920.1	L-Aspartase-like family protein;(source:Araport11)	protein_coding			-0.341012	5.3905	9.48521	0.00207135
AT1G52300	AT1G52300.1	Zinc-binding ribosomal protein family protein;(source:Araport11)	protein_coding			-0.288927	8.5128	9.49258	0.00206304
AT4G33865	AT4G33865.1	Ribosomal protein S14p/S29e family protein;(source:Araport11)	protein_coding			-0.296895	6.86848	9.52679	0.00202494
AT1G13609	AT1G13609.1	Encodes a defensin-like (DEFL) family protein.	protein_coding			-2.3878	0.226911	9.53158	0.00201966
AT4G18100	AT4G18100.1	Ribosomal protein L32e;(source:Araport11)	protein_coding			-0.317395	8.27187	9.55039	0.00199907
AT1G04680	AT1G04680.1	Pectin lyase-like superfamily protein;(source:Araport11)	protein_coding			-0.387249	6.63558	9.55612	0.00199284
AT3G27150	AT3G27150.1	Target gene of MIR2111-5p.	protein_coding			-0.568073	5.04161	9.57717	0.00197012
AT5G11750	AT5G11750.1	Ribosomal protein L19 family protein;(source:Araport11)	protein_coding			-0.503634	3.34453	9.57904	0.00196811
AT1G16740	AT1G16740.1	Ribosomal protein L20;(source:Araport11)	protein_coding			-0.406673	4.83093	9.58082	0.00196621
AT5G59240	AT5G59240.1	Ribosomal protein S8e family protein;(source:Araport11)	protein_coding			-0.748619	2.76433	9.62946	0.00191481
AT5G07800	AT5G07800.1	Flavin-binding monooxygenase family protein;(source:Araport11)	protein_coding			-0.754217	2.57106	9.6528	0.00189063
AT2G05510	AT2G05510.1	Glycine-rich protein family;(source:Araport11)	protein_coding			-0.705317	9.68874	9.66684	0.00187623
AT5G52840	AT5G52840.1	NADH-ubiquinone oxidoreductase-like protein;(source:Araport11)	protein_coding			-0.259511	7.31478	9.67824	0.00186463
AT1G21280	AT1G21280.1	Copia-like polyprotein/retrotransposon;(source:Araport11)	protein_coding			-0.566402	2.64928	9.70363	0.00183905
AT5G15520	AT5G15520.1	Ribosomal protein S19e family protein;(source:Araport11)	protein_coding			-0.429996	4.85368	9.70989	0.00183279
AT1G18090	AT1G18090.1	5-3 exonuclease family protein;(source:Araport11)	protein_coding			-0.689133	2.22869	9.71738	0.00182533
AT2G43110	AT2G43110.1	U3 containing 90S pre-ribosomal complex subunit;(source:Araport11)	protein_coding			-0.569682	4.19548	9.7208	0.00182194
AT1G08220	AT1G08220.1	ATPase complex subunit;(source:Araport11)	protein_coding			-0.493479	3.62717	9.73175	0.00181112
AT2G25720	AT2G25720.1	hypothetical protein;(source:Araport11)	protein_coding			-0.458025	3.43968	9.74328	0.00179979
AT2G30060	AT2G30060.1	Pleckstrin homology (PH) domain superfamily protein;(source:Araport11)	protein_coding			-0.341354	6.42525	9.74525	0.00179786
AT3G03920	AT3G03920.1	H/ACA ribonucleoprotein complex, subunit Gar1/Naf1 protein;(source:Araport11)	protein_coding			-0.330701	7.17269	9.75343	0.00178989
AT1G02360	AT1G02360.1	Chitinase family protein;(source:Araport11)	protein_coding			-0.286031	5.86244	9.7751	0.00176891
AT1G27350	AT1G27350.1	Ribosome associated membrane protein RAMP4;(source:Araport11)	protein_coding			-0.398619	5.71619	9.79646	0.00174848
AT3G53940	AT3G53940.1	Mitochondrial substrate carrier family protein;(source:Araport11)	protein_coding			-0.550875	3.4198	9.81262	0.00173319
AT3G04320	AT3G04320.1	Kunitz family trypsin and protease inhibitor protein;(source:Araport11)	protein_coding			-0.623256	3.2143	9.83037	0.00171654
AT4G24920	AT4G24920.1	secE/sec61-gamma protein transport protein;(source:Araport11)	protein_coding			-0.39147	6.0494	9.8481	0.00170007
AT1G73940	AT1G73940.1	tumor necrosis factor receptor family protein;(source:Araport11)	protein_coding			-0.317996	5.73652	9.85074	0.00169763
AT5G10070	AT5G10070.2	RNase L inhibitor protein-like protein;(source:Araport11)	protein_coding			-0.415384	4.21397	9.8633	0.00168608
AT5G41685	AT5G41685.1	Mitochondrial outer membrane translocase complex, subunit Tom7;(source:Araport11)	protein_coding			-0.332404	5.44856	9.87188	0.00167824
AT4G29310	AT4G29310.1	DUF1005 family protein (DUF1005);(source:Araport11)	protein_coding			-0.485332	3.99722	9.87653	0.00167401
AT4G01870	AT4G01870.1	tolB protein-like protein;(source:Araport11)	protein_coding			-0.371165	6.60882	9.8851	0.00166623
AT3G13910	AT3G13910.1	hypothetical protein (DUF3511);(source:Araport11)	protein_coding			-0.485271	4.74754	9.89442	0.00165781
AT4G25835	AT4G25835.1	P-loop containing nucleoside triphosphate hydrolases superfamily protein;(source:Araport11)	protein_coding			-0.429413	3.9831	9.90096	0.00165192
AT3G13940	AT3G13940.1	DNA binding / DNA-directed RNA polymerase;(source:Araport11)	protein_coding			-0.511233	4.5387	9.90286	0.00165022
AT3G11250	AT3G11250.1	Ribosomal protein L10 family protein;(source:Araport11)	protein_coding			-0.380532	5.81047	9.90427	0.00164896
AT1G31940	AT1G31940.1	cystic fibrosis transmembrane conductance regulator;(source:Araport11)	protein_coding			-0.507031	4.20052	9.94749	0.00161069
AT2G22122	AT2G22122.1	hypothetical protein;(source:Araport11)	protein_coding			-0.589712	6.5795	9.95013	0.00160838
AT1G64650	AT1G64650.1	Major facilitator superfamily protein;(source:Araport11)	protein_coding			-0.352772	6.65904	9.97395	0.00158771
AT3G15357	AT3G15357.1	phosphopantothenoylcysteine decarboxylase subunit;(source:Araport11)	protein_coding			-0.391676	4.22305	9.98794	0.00157569
AT2G28810	AT2G28810.1	Dof-type zinc finger DNA-binding family protein;(source:Araport11)	protein_coding			-0.415337	5.03928	10.0112	0.00155593
AT3G21540	AT3G21540.1	transducin family protein / WD-40 repeat family protein;(source:Araport11)	protein_coding			-0.492229	5.10963	10.0423	0.00152989
AT1G66820	AT1G66820.1	glycine-rich protein;(source:Araport11)	protein_coding			-0.551414	3.16894	10.0461	0.00152675
AT5G39840	AT5G39840.1	ATP-dependent RNA helicase;(source:Araport11)	protein_coding			-0.589174	3.64517	10.0496	0.00152384
AT3G46690	AT3G46690.1	UDP-Glycosyltransferase superfamily protein;(source:Araport11)	protein_coding			-0.458049	5.19157	10.0795	0.00149929
AT1G52510	AT1G52510.1	alpha/beta-Hydrolases superfamily protein;(source:Araport11)	protein_coding			-0.680285	2.85305	10.0824	0.00149694
AT5G62960	AT5G62960.1	UDP-N-acetylglucosamine-N-acetylmuramyl-pyrophosphoryl-undecaprenol N-acetylglucosamine protein;(source:Araport11)	protein_coding			-0.507997	3.26589	10.134	0.00145563
AT1G80520	AT1G80520.1	Sterile alpha motif (SAM) domain-containing protein;(source:Araport11)	protein_coding			-0.628932	2.70437	10.1368	0.00145339
AT2G43550	AT2G43550.1	Encodes a defensin-like (DEFL) family protein.	protein_coding			-0.525147	3.55914	10.1476	0.0014449
AT3G52360	AT3G52360.1	transmembrane protein;(source:Araport11)	protein_coding			-0.400427	5.99675	10.1696	0.00142776
AT4G18440	AT4G18440.1	L-Aspartase-like family protein;(source:Araport11)	protein_coding			-0.459465	4.489	10.1926	0.00141002
AT3G55690	AT3G55690.1	hypothetical protein;(source:Araport11)	protein_coding			-0.636706	2.34072	10.2441	0.00137122
AT3G01820	AT3G01820.1	P-loop containing nucleoside triphosphate hydrolases superfamily protein;(source:Araport11)	protein_coding			-0.349364	5.55693	10.2557	0.00136262
AT4G03610	AT4G03610.1	Metallo-hydrolase/oxidoreductase superfamily protein;(source:Araport11)	protein_coding			-0.389262	4.21838	10.2834	0.0013423
AT5G58480	AT5G58480.1	O-Glycosyl hydrolases family 17 protein;(source:Araport11)	protein_coding			-0.471284	3.51555	10.2914	0.00133651
AT5G58420	AT5G58420.1	Ribosomal protein S4 (RPS4A) family protein;(source:Araport11)	protein_coding			-0.341148	8.16243	10.3201	0.00131589
AT2G25355	AT2G25355.1	PNAS-3-like protein;(source:Araport11)	protein_coding			-0.607518	3.3907	10.3612	0.00128694
AT2G13550	AT2G13550.1	hypothetical protein;(source:Araport11)	protein_coding			-0.382475	4.32305	10.4248	0.00124336
AT5G21105	AT5G21105.1	Plant L-ascorbate oxidase;(source:Araport11)	protein_coding			-0.33908	6.46213	10.4409	0.00123253
AT2G19060	AT2G19060.1	SGNH hydrolase-type esterase superfamily protein;(source:Araport11)	protein_coding			-0.774207	3.88289	10.4894	0.00120059
AT4G22000	AT4G22000.1	tyrosine sulfotransferase-like protein;(source:Araport11)	protein_coding			-0.34965	5.15346	10.5191	0.00118147
AT1G58280	AT1G58280.2	Phosphoglycerate mutase family protein;(source:Araport11)	protein_coding			-0.436017	4.31224	10.568	0.00115065
AT2G44040	AT2G44040.1	Dihydrodipicolinate reductase, bacterial/plant;(source:Araport11)	protein_coding			-0.537911	3.83099	10.5812	0.00114241
AT1G65845	AT1G65845.1	transmembrane protein;(source:Araport11)	protein_coding			-0.422052	6.158	10.5955	0.00113366
AT2G44120	AT2G44120.2	Ribosomal protein L30/L7 family protein;(source:Araport11)	protein_coding			-0.325055	7.78988	10.6337	0.00111044
AT2G33845	AT2G33845.1	Nucleic acid-binding, OB-fold-like protein;(source:Araport11)	protein_coding			-0.345102	5.06771	10.6381	0.00110782
AT1G04945	AT1G04945.3	HIT-type Zinc finger family protein;(source:Araport11)	protein_coding			-0.474465	3.7826	10.6736	0.00108676
AT4G31985	AT4G31985.1	Ribosomal protein L39 family protein;(source:Araport11)	protein_coding			-0.308399	6.81272	10.6848	0.00108022
AT1G80150	AT1G80150.1	Tetratricopeptide repeat (TPR)-like superfamily protein;(source:Araport11)	protein_coding			-0.57098	3.34472	10.6884	0.00107811
AT3G06145	AT3G06145.1	RING zinc finger protein;(source:Araport11)	protein_coding			-0.75106	1.97245	10.7705	0.00103131
AT1G65560	AT1G65560.1	Zinc-binding dehydrogenase family protein;(source:Araport11)	protein_coding			-0.468317	3.99478	10.7724	0.00103026
AT5G07090	AT5G07090.1	Ribosomal protein S4 (RPS4A) family protein;(source:Araport11)	protein_coding			-0.360895	8.39541	10.7811	0.00102539
AT1G57660	AT1G57660.1	Translation protein SH3-like family protein;(source:Araport11)	protein_coding			-0.361143	7.59566	10.7817	0.00102507
AT4G13710	AT4G13710.1	Pectin lyase-like superfamily protein;(source:Araport11)	protein_coding			-0.682585	4.46043	10.8243	0.00100174
AT2G45300	AT2G45300.1	encodes 3-phosphoshikimate 1-carboxyvinyltransferase / 5-enolpyruvylshikimate-3-phosphate / EPSP synthase involved in chorismate biosynthesis The mRNA is cell-to-cell mobile.	protein_coding			-0.374809	6.73586	10.832	0.000997594
AT3G20730	AT3G20730.1	PPR superfamily protein;(source:Araport11)	protein_coding			-1.45251	-0.235339	10.8498	0.000988081
AT1G28100	AT1G28100.4	hypothetical protein;(source:Araport11)	protein_coding			-0.449451	4.9284	10.852	0.000986886
AT1G64405	AT1G64405.1	hypothetical protein;(source:Araport11)	protein_coding			-0.735769	2.8292	10.8833	0.000970343
AT1G24210	AT1G24210.1	Paired amphipathic helix (PAH2) superfamily protein;(source:Araport11)	protein_coding			-1.65995	-0.358494	10.9	0.00096162
AT3G15080	AT3G15080.1	Polynucleotidyl transferase, ribonuclease H-like superfamily protein;(source:Araport11)	protein_coding			-0.42531	3.69595	10.9244	0.000949055
AT4G10480	AT4G10480.1	Nascent polypeptide-associated complex (NAC), alpha subunit family protein;(source:Araport11)	protein_coding			-0.379394	7.37963	10.9749	0.000923523
AT2G40240	AT2G40240.1	Tetratricopeptide repeat (TPR)-like superfamily protein;(source:Araport11)	protein_coding			-0.773344	1.66282	11.0427	0.000890364
AT2G07706	AT2G07706.1	hypothetical protein;(source:Araport11)	protein_coding			-1.8215	4.30313	11.1262	0.000851147
AT5G23830	AT5G23830.1	MD-2-related lipid recognition domain-containing protein;(source:Araport11)	protein_coding			-0.486216	6.35554	11.182	0.000825932
AT3G19440	AT3G19440.1	Pseudouridine synthase family protein;(source:Araport11)	protein_coding			-0.723486	3.31009	11.1958	0.000819808
AT1G56670	AT1G56670.1	GDSL-motif esterase/acyltransferase/lipase. Enzyme group with broad substrate specificity that may catalyze acyltransfer or hydrolase reactions with lipid and non-lipid substrates.	protein_coding			-0.720914	2.5815	11.2116	0.000812892
AT2G38730	AT2G38730.1	Cyclophilin-like peptidyl-prolyl cis-trans isomerase family protein;(source:Araport11)	protein_coding			-0.511374	3.90665	11.2533	0.000794815
AT5G63150	AT5G63150.1	hypothetical protein;(source:Araport11)	protein_coding			-0.473227	4.27229	11.2598	0.00079204
AT5G23535	AT5G23535.1	KOW domain-containing protein;(source:Araport11)	protein_coding			-0.380539	5.30391	11.2886	0.000779856
AT1G18540	AT1G18540.1	Ribosomal protein L6 family protein;(source:Araport11)	protein_coding			-0.403617	8.28706	11.2998	0.000775156
AT3G21351	AT3G21351.1	transmembrane protein;(source:Araport11)	protein_coding			-0.809335	2.72156	11.3055	0.000772761
AT1G53645	AT1G53645.1	hydroxyproline-rich glycoprotein family protein;(source:Araport11)	protein_coding			-0.456856	5.69051	11.3324	0.00076166
AT3G15680	AT3G15680.1	Ran BP2/NZF zinc finger-like superfamily protein;(source:Araport11)	protein_coding			-0.536247	3.99161	11.4067	0.000731813
AT3G62870	AT3G62870.1	Ribosomal protein L7Ae/L30e/S12e/Gadd45 family protein;(source:Araport11)	protein_coding			-0.320872	8.76409	11.4297	0.000722794
AT1G55630	AT1G55630.1	Pentatricopeptide repeat (PPR) superfamily protein;(source:Araport11)	protein_coding			-0.483988	3.0267	11.44	0.000718812
AT1G48460	AT1G48460.1	tRNA-processing ribonuclease BN;(source:Araport11)	protein_coding			-0.604733	3.06128	11.5052	0.000694007
AT4G00530	AT4G00530.1	UvrABC system protein A;(source:Araport11)	protein_coding			-0.804956	1.55827	11.5193	0.000688775
AT5G19300	AT5G19300.1	methyltransferase C9orf114 protein;(source:Araport11)	protein_coding			-0.485927	4.20683	11.5516	0.000676894
AT4G29700	AT4G29700.1	Alkaline-phosphatase-like family protein;(source:Araport11)	protein_coding			-0.529023	6.49287	11.596	0.000660944
AT5G22440	AT5G22440.1	Ribosomal protein L1p/L10e family;(source:Araport11)	protein_coding			-0.409527	7.18756	11.6229	0.000651452
AT3G12860	AT3G12860.1	NOP56-like pre RNA processing ribonucleoprotein;(source:Araport11)	protein_coding			-0.562677	4.41461	11.6695	0.000635321
AT2G37975	AT2G37975.1	Yos1-like protein;(source:Araport11)	protein_coding			-0.633077	3.29726	11.6922	0.000627637
AT5G42060	AT5G42060.1	DEK, chromatin associated protein;(source:Araport11)	protein_coding			-0.40652	4.25143	11.7316	0.00061447
AT1G77520	AT1G77520.1	O-methyltransferase family protein;(source:Araport11)	protein_coding			-0.620215	6.37411	11.7429	0.000610757
AT2G41810	AT2G41810.1	imidazolonepropionase (Protein of unknown function, DUF642);(source:Araport11)	protein_coding			-1.61853	1.67969	11.7515	0.000607952
AT3G46320	AT3G46320.1	Histone superfamily protein;(source:Araport11)	protein_coding			-0.516049	4.61191	11.752	0.000607778
AT4G36470	AT4G36470.1	S-adenosyl-L-methionine-dependent methyltransferases superfamily protein;(source:Araport11)	protein_coding			-0.512288	3.65305	11.757	0.000606148
AT4G29480	AT4G29480.1	Mitochondrial ATP synthase subunit G protein;(source:Araport11)	protein_coding			-0.296842	6.95787	11.7606	0.000604973
AT4G28450	AT4G28450.1	This gene is predicted to encode a protein with a DWD motif. It can bind to DDB1a in Y2H assays and may be involved in the formation of a CUL4-based E3 ubiquitin ligase	protein_coding			-0.442475	5.27524	11.7761	0.000599954
AT5G43960	AT5G43960.1	Nuclear transport factor 2 (NTF2) family protein with RNA binding (RRM-RBD-RNP motifs) domain-containing protein;(source:Araport11)	protein_coding		GTPASE?ACTIVATING PROTEIN SH3-DOMAIN?BINDING PROTEIN LIKE (G3BP-LIKE)	-0.411934	6.38512	11.777	0.000599664
AT4G36420	AT4G36420.1	Ribosomal protein L12 family protein;(source:Araport11)	protein_coding			-0.468541	5.35186	11.8334	0.000581771
AT1G69580	AT1G69580.2	Homeodomain-like superfamily protein;(source:Araport11)	protein_coding			-0.456591	4.57405	11.8792	0.000567636
AT1G49500	AT1G49500.1	transcription initiation factor TFIID subunit 1b-like protein;(source:Araport11)	protein_coding			-0.51322	7.10389	11.8824	0.000566674
AT4G29410	AT4G29410.1	Ribosomal L28e protein family;(source:Araport11)	protein_coding			-0.29241	7.18739	11.9416	0.000548953
AT4G14120	AT4G14120.1	hypothetical protein;(source:Araport11)	protein_coding			-1.14027	1.01573	11.9515	0.000546021
AT1G71070	AT1G71070.1	Core-2/I-branching beta-1,6-N-acetylglucosaminyltransferase family protein;(source:Araport11)	protein_coding			-0.369666	5.42013	11.9702	0.000540584
AT4G12600	AT4G12600.2	Ribosomal protein L7Ae/L30e/S12e/Gadd45 family protein;(source:Araport11)	protein_coding			-0.444696	6.7806	11.998	0.00053257
AT1G26750	AT1G26750.1	hypothetical protein;(source:Araport11)	protein_coding			-0.351548	4.75644	12.0116	0.000528696
AT5G53070	AT5G53070.1	Ribosomal protein L9/RNase H1;(source:Araport11)	protein_coding			-0.389867	4.39999	12.085	0.000508279
AT1G74270	AT1G74270.1	Ribosomal protein L35Ae family protein;(source:Araport11)	protein_coding			-0.352408	6.66483	12.1095	0.000501654
AT3G60700	AT3G60700.1	hypothetical protein (DUF1163);(source:Araport11)	protein_coding			-1.04595	0.991962	12.1527	0.00049016
AT2G20710	AT2G20710.1	Tetratricopeptide repeat (TPR)-like superfamily protein;(source:Araport11)	protein_coding			-0.7938	2.63903	12.185	0.000481761
AT4G18630	AT4G18630.1	hypothetical protein (DUF688);(source:Araport11)	protein_coding			-0.557569	4.82265	12.191	0.000480207
AT1G70100	AT1G70100.3	neurofilament heavy protein;(source:Araport11)	protein_coding			-0.43497	3.63753	12.1939	0.000479463
AT5G27770	AT5G27770.1	Ribosomal L22e protein family;(source:Araport11)	protein_coding			-0.355578	7.45072	12.2067	0.000476173
AT2G40460	AT2G40460.1	Major facilitator superfamily protein;(source:Araport11)	protein_coding			-0.535483	6.21309	12.239	0.000468009
AT2G45710	AT2G45710.1	Zinc-binding ribosomal protein family protein;(source:Araport11)	protein_coding			-0.401657	4.42063	12.2486	0.0004656
AT1G56045	AT1G56045.1	Ribosomal protein L41 family;(source:Araport11)	protein_coding			-0.539636	5.85565	12.2737	0.000459377
AT3G59340	AT3G59340.1	solute carrier family 35 protein (DUF914);(source:Araport11)	protein_coding			-0.512222	4.07641	12.2887	0.000455713
AT5G40080	AT5G40080.1	Mitochondrial ribosomal protein L27;(source:Araport11)	protein_coding			-0.546505	2.88303	12.3384	0.000443725
AT1G01630	AT1G01630.1	Sec14p-like phosphatidylinositol transfer family protein;(source:Araport11)	protein_coding			-0.368613	5.88985	12.3511	0.000440725
AT1G28570	AT1G28570.1	SGNH hydrolase-type esterase superfamily protein;(source:Araport11)	protein_coding			-0.475269	3.5933	12.36	0.000438631
AT4G04180	AT4G04180.1	P-loop containing nucleoside triphosphate hydrolases superfamily protein;(source:Araport11)	protein_coding			-0.605584	2.86623	12.3974	0.000429925
AT5G02960	AT5G02960.1	Ribosomal protein S12/S23 family protein;(source:Araport11)	protein_coding			-0.376367	8.86249	12.4029	0.000428663
AT4G18810	AT4G18810.2	NAD(P)-binding Rossmann-fold superfamily protein;(source:Araport11)	protein_coding			-0.589996	2.72022	12.4399	0.00042025
AT3G52040	AT3G52040.1	2,3-bisphosphoglycerate-dependent phosphoglycerate mutase;(source:Araport11)	protein_coding			-0.521382	4.27635	12.5014	0.000406648
AT1G09690	AT1G09690.1	Translation protein SH3-like family protein;(source:Araport11)	protein_coding			-0.330006	8.7676	12.5718	0.000391605
AT4G22320	AT4G22320.1	golgin family A protein;(source:Araport11)	protein_coding			-0.601353	3.92465	12.5814	0.000389601
AT2G19460	AT2G19460.1	DUF3511 domain protein (DUF3511);(source:Araport11)	protein_coding			-0.631953	2.72089	12.5946	0.000386853
AT5G46430	AT5G46430.1	Ribosomal protein L32e;(source:Araport11)	protein_coding			-0.319291	7.97875	12.6003	0.000385684
AT4G39300	AT4G39300.1	envelope glycoprotein;(source:Araport11)	protein_coding			-0.45012	4.51185	12.6085	0.000383993
AT3G50300	AT3G50300.1	HXXXD-type acyl-transferase family protein;(source:Araport11)	protein_coding			-0.610018	5.63189	12.6826	0.000369071
AT3G47370	AT3G47370.2	Ribosomal protein S10p/S20e family protein;(source:Araport11)	protein_coding			-0.420354	6.95167	12.7114	0.000363441
AT3G13230	AT3G13230.1	RNA-binding KH domain-containing protein;(source:Araport11)	protein_coding			-0.400671	4.99248	12.767	0.000352788
AT4G16410	AT4G16410.1	transmembrane protein;(source:Araport11)	protein_coding			-0.764448	3	12.774	0.000351479
AT4G37090	AT4G37090.1	UDP-N-acetylmuramoyl-L-alanyl-D-glutamate-2, 6-diaminopimelate ligase;(source:Araport11)	protein_coding			-0.441035	4.67824	12.7843	0.000349542
AT2G38870	AT2G38870.1	Predicted to encode a PR (pathogenesis-related) peptide that belongs to the PR-6 proteinase inhibitor family. Six putative PR-6-type protein encoding genes are found in Arabidopsis: At2g38900, At2g38870, At5g43570, At5g43580, At3g50020 and At3g46860.	protein_coding			-0.712595	6.07933	12.7904	0.000348394
AT4G16720	AT4G16720.1	Ribosomal protein L23/L15e family protein;(source:Araport11)	protein_coding			-0.413056	8.88343	12.7999	0.000346641
AT3G09730	AT3G09730.2	POLAR LOCALIZATION DURING ASYMMETRIC DIVISION AND protein;(source:Araport11)	protein_coding			-0.693806	2.0934	12.8084	0.000345066
AT2G18900	AT2G18900.1	Transducin/WD40 repeat-like superfamily protein;(source:Araport11)	protein_coding			-0.568151	5.31348	12.8207	0.000342797
AT5G48020	AT5G48020.1	2-oxoglutarate (2OG) and Fe(II)-dependent oxygenase superfamily protein;(source:Araport11)	protein_coding			-0.315856	5.74359	12.8439	0.000338578
AT3G28900	AT3G28900.1	Ribosomal protein L34e superfamily protein;(source:Araport11)	protein_coding			-0.413417	6.14425	12.8652	0.000334741
AT2G23820	AT2G23820.2	Metal-dependent phosphohydrolase;(source:Araport11)	protein_coding			-0.407952	4.08367	12.9331	0.000322821
AT1G22065	AT1G22065.1	hypothetical protein;(source:Araport11)	protein_coding			-0.720859	4.01842	12.9581	0.000318545
AT1G63250	AT1G63250.1	DEA(D/H)-box RNA helicase family protein;(source:Araport11)	protein_coding			-0.660686	3.41987	12.9827	0.000314376
AT2G39500	AT2G39500.1	hexose transporter;(source:Araport11)	protein_coding			-0.557125	3.2662	13.0096	0.000309904
AT1G31835	AT1G31835.1	hypothetical protein;(source:Araport11)	protein_coding			-0.722958	1.57673	13.0608	0.000301539
AT3G55605	AT3G55605.1	Mitochondrial glycoprotein family protein;(source:Araport11)	protein_coding			-0.554141	3.91172	13.1656	0.000285141
AT5G63000	AT5G63000.1	Mitochondrial import inner membrane translocase subunit Tim17/Tim22/Tim23 family protein;(source:Araport11)	protein_coding			-0.401454	4.1987	13.1743	0.000283811
AT5G48740	AT5G48740.1	Leucine-rich repeat protein kinase family protein;(source:Araport11)	protein_coding			-0.707225	2.71908	13.1923	0.000281102
AT4G15450	AT4G15450.1	Senescence/dehydration-associated protein-like protein;(source:Araport11)	protein_coding			-0.447148	3.88189	13.2372	0.000274443
AT2G31610	AT2G31610.1	Ribosomal protein S3 family protein;(source:Araport11)	protein_coding			-0.39631	8.04088	13.2389	0.0002742
AT5G66860	AT5G66860.1	Ribosomal protein L25/Gln-tRNA synthetase, anti-codon-binding domain-containing protein;(source:Araport11)	protein_coding			-0.432549	6.03062	13.2983	0.000265641
AT3G07110	AT3G07110.2	Ribosomal protein L13 family protein;(source:Araport11)	protein_coding			-0.438959	7.90411	13.3123	0.000263666
AT4G26210	AT4G26210.1	Mitochondrial ATP synthase subunit G protein;(source:Araport11)	protein_coding			-0.385427	4.95792	13.3161	0.000263131
AT1G71850	AT1G71850.1	Ubiquitin carboxyl-terminal hydrolase family protein;(source:Araport11)	protein_coding			-0.782825	3.402	13.3307	0.00026109
AT5G14580	AT5G14580.1	polyribonucleotide nucleotidyltransferase;(source:Araport11)	protein_coding			-0.745867	4.7061	13.3317	0.000260953
AT3G02190	AT3G02190.1	Ribosomal protein L39 family protein;(source:Araport11)	protein_coding			-0.446923	4.58133	13.4098	0.000250312
AT1G65295	AT1G65295.1	ubiquitin carboxyl-terminal hydrolase;(source:Araport11)	protein_coding			-0.600359	3.74848	13.4258	0.000248186
AT1G34030	AT1G34030.1	Ribosomal protein S13/S18 family;(source:Araport11)	protein_coding			-0.37239	7.12672	13.536	0.000234031
AT1G74458	AT1G74458.1	transmembrane protein;(source:Araport11)	protein_coding			-0.654933	5.09893	13.5367	0.000233943
AT2G32060	AT2G32060.1	Ribosomal protein L7Ae/L30e/S12e/Gadd45 family protein;(source:Araport11)	protein_coding			-0.479036	7.50565	13.5562	0.000231524
AT1G55210	AT1G55210.1	Disease resistance-responsive (dirigent-like protein) family protein;(source:Araport11)	protein_coding			-0.720275	6.4923	13.5618	0.000230835
AT5G02450	AT5G02450.1	Ribosomal protein L36e family protein;(source:Araport11)	protein_coding			-0.348294	7.90797	13.5802	0.00022858
AT4G10450	AT4G10450.1	Ribosomal protein L6 family;(source:Araport11)	protein_coding			-0.461387	6.09954	13.6148	0.000224408
AT4G31360	AT4G31360.1	selenium binding protein;(source:Araport11)	protein_coding			-0.548186	3.28952	13.6169	0.000224162
AT2G34585	AT2G34585.1	transmembrane protein;(source:Araport11)	protein_coding			-0.463684	5.96275	13.6391	0.000221525
AT3G21400	AT3G21400.1	dynein beta chain, ciliary protein;(source:Araport11)	protein_coding			-0.523249	3.94695	13.6508	0.000220146
AT3G10530	AT3G10530.1	Transducin/WD40 repeat-like superfamily protein;(source:Araport11)	protein_coding			-0.681209	4.69674	13.6726	0.000217604
AT2G35790	AT2G35790.1	transmembrane protein;(source:Araport11)	protein_coding			-0.396967	5.10875	13.7215	0.000212012
AT2G26730	AT2G26730.1	Leucine-rich repeat protein kinase family protein;(source:Araport11)	protein_coding			-0.339686	6.43183	13.7433	0.000209571
AT5G23360	AT5G23360.1	GRAM domain-containing protein / ABA-responsive protein-like protein;(source:Araport11)	protein_coding			-0.609194	3.17527	13.7746	0.000206108
AT1G15085	AT1G15085.1	hypothetical protein;(source:Araport11)	protein_coding			-0.94508	2.11879	13.79	0.000204426
AT4G03180	AT4G03180.1	rRNA-processing protein;(source:Araport11)	protein_coding			-0.439098	4.28488	13.8077	0.000202509
AT5G41060	AT5G41060.1	DHHC-type zinc finger family protein;(source:Araport11)	protein_coding			-0.430963	4.44726	13.8863	0.000194213
AT4G13170	AT4G13170.1	Ribosomal protein L13 family protein;(source:Araport11)	protein_coding			-0.341	6.05128	13.9277	0.000189979
AT5G16130	AT5G16130.1	Ribosomal protein S7e family protein;(source:Araport11)	protein_coding			-0.377694	8.2061	13.9396	0.000188782
AT5G20180	AT5G20180.1	Ribosomal protein L36;(source:Araport11)	protein_coding			-0.462298	4.57772	13.9981	0.000182995
AT1G04340	AT1G04340.1	HR-like lesion-inducing protein-like protein;(source:Araport11)	protein_coding			-0.504869	5.06349	14.0108	0.00018176
AT3G44380	AT3G44380.1	Late embryogenesis abundant (LEA) hydroxyproline-rich glycoprotein family;(source:Araport11)	protein_coding			-0.549798	3.12846	14.0307	0.00017985
AT1G07930	AT1G07930.1	GTP binding Elongation factor Tu family protein;(source:Araport11)	protein_coding			-0.341996	9.33194	14.0345	0.000179487
AT1G27330	AT1G27330.1	Ribosome associated membrane protein RAMP4;(source:Araport11)	protein_coding			-0.565543	6.1351	14.0801	0.000175188
AT1G30600	AT1G30600.1	Subtilase family protein;(source:Araport11)	protein_coding			-0.517941	4.33699	14.0901	0.000174256
AT4G04940	AT4G04940.1	transducin family protein / WD-40 repeat family protein;(source:Araport11)	protein_coding			-0.713443	4.94619	14.1305	0.000170554
AT3G56020	AT3G56020.1	Ribosomal protein L41 family;(source:Araport11)	protein_coding			-0.638145	5.29688	14.1826	0.000165896
AT5G53700	AT5G53700.1	RNA-binding (RRM/RBD/RNP motifs) family protein;(source:Araport11)	protein_coding			-1.34056	0.438232	14.2524	0.000159858
AT1G67620	AT1G67620.1	Lojap-related protein;(source:Araport11)	protein_coding			-0.68348	3.16809	14.2663	0.000158679
AT5G02050	AT5G02050.1	Mitochondrial glycoprotein family protein;(source:Araport11)	protein_coding			-0.656457	6.04548	14.2822	0.000157342
AT4G32950	AT4G32950.1	Protein phosphatase 2C family protein;(source:Araport11)	protein_coding			-2.82124	-0.572169	14.3039	0.000155541
AT2G05220	AT2G05220.1	Ribosomal S17 family protein;(source:Araport11)	protein_coding			-0.385598	7.66613	14.3387	0.000152694
AT3G07910	AT3G07910.1	reactive oxygen species modulator-like protein;(source:Araport11)	protein_coding			-0.484641	5.30114	14.4279	0.000145631
AT4G11190	AT4G11190.1	Disease resistance-responsive (dirigent-like protein) family protein;(source:Araport11)	protein_coding			-1.08266	5.16709	14.4546	0.000143578
AT1G73230	AT1G73230.1	Nascent polypeptide-associated complex NAC;(source:Araport11)	protein_coding			-0.369564	7.57985	14.4807	0.000141599
AT4G28360	AT4G28360.1	Ribosomal protein L22p/L17e family protein;(source:Araport11)	protein_coding			-0.430636	5.33836	14.4908	0.000140849
AT3G04840	AT3G04840.1	Ribosomal protein S3Ae;(source:Araport11)	protein_coding			-0.480743	8.66688	14.4948	0.000140549
AT2G31490	AT2G31490.1	neuronal acetylcholine receptor subunit alpha-5;(source:Araport11)	protein_coding			-0.341627	6.60773	14.502	0.000140009
AT1G24881	AT1G24881.1	F-box family protein;(source:Araport11)	protein_coding			-3.91204	2.45328	14.5239	0.000138393
AT2G04090	AT2G04090.1	MATE efflux family protein;(source:Araport11)	protein_coding			-0.451692	4.10248	14.5775	0.000134512
AT2G39795	AT2G39795.1	Mitochondrial glycoprotein family protein;(source:Araport11)	protein_coding			-0.66286	4.04849	14.5785	0.000134442
AT1G57860	AT1G57860.1	Translation protein SH3-like family protein;(source:Araport11)	protein_coding			-0.424227	6.50195	14.7293	0.000124102
AT5G14105	AT5G14105.1	hypothetical protein;(source:Araport11)	protein_coding			-0.454379	4.62526	14.7572	0.00012228
AT3G54880	AT3G54880.1	zinc finger protein;(source:Araport11)	protein_coding			-0.44743	6.61497	14.7834	0.000120594
AT5G10160	AT5G10160.1	Thioesterase superfamily protein;(source:Araport11)	protein_coding			-0.389371	5.19062	14.7977	0.000119681
AT5G65860	AT5G65860.1	ankyrin repeat family protein;(source:Araport11)	protein_coding			-0.484339	4.27994	14.8397	0.000117049
AT2G46535	AT2G46535.1	hypothetical protein;(source:Araport11)	protein_coding			-0.462359	5.1988	14.8625	0.000115638
AT3G62450	AT3G62450.1	DNA mismatch repair protein;(source:Araport11)	protein_coding			-0.414102	4.33234	14.8779	0.0001147
AT1G78060	AT1G78060.1	Glycosyl hydrolase family protein;(source:Araport11)	protein_coding			-0.427187	6.71417	14.9048	0.000113075
AT5G27120	AT5G27120.1	SAR DNA-binding protein, putative, strong similarity to SAR DNA-binding protein-1 (Pisum sativum) GI:3132696; contains Pfam profile PF01798: Putative snoRNA binding domain; has similarity to MAR binding NOP58 protein The mRNA is cell-to-cell mobile.	protein_coding			-0.50635	6.8546	14.9862	0.000108301
AT2G01990	AT2G01990.1	XRI1-like protein;(source:Araport11)	protein_coding			-0.777649	3.28254	14.9882	0.000108188
AT3G25290	AT3G25290.1	Auxin-responsive family protein;(source:Araport11)	protein_coding			-0.556165	5.86783	15.0358	0.00010549
AT2G31725	AT2G31725.1	FAM136A-like protein (DUF842);(source:Araport11)	protein_coding			-0.772721	3.32428	15.0567	0.000104329
AT1G27050	AT1G27050.1	Encodes a protein with a RNA recognition motif. Previously annotated as ATHB54, a homeodomain leucine zipper (HD-Zip) family protein. In the TAIR10 genome release (2010), this locus was split into two loci: AT1G27045 (containing homeodomain and leucine zipper domains) and AT1G27050 (containing a RNA recognition motif). AT1G27045 is now named ATHB54. Note that Affymetrix ATH1 Probe Set linked to s…	protein_coding		HOMEOBOX PROTEIN 54 (HB54);HOMEOBOX PROTEIN 54 (ATHB54)	-0.569827	3.62138	15.0599	0.000104152
AT3G02650	AT3G02650.1	Tetratricopeptide repeat (TPR)-like superfamily protein;(source:Araport11)	protein_coding			-0.567008	4.93881	15.161	9.87238e-05
AT4G11120	AT4G11120.1	translation elongation factor Ts (EF-Ts);(source:Araport11)	protein_coding			-0.546612	5.13797	15.2754	9.29198e-05
AT1G28400	AT1G28400.1	GATA zinc finger protein;(source:Araport11)	protein_coding			-0.408925	8.41234	15.2937	9.20234e-05
AT2G46940	AT2G46940.1	fold protein;(source:Araport11)	protein_coding			-0.568103	2.66472	15.2984	9.17963e-05
AT3G11120	AT3G11120.1	Ribosomal protein L41 family;(source:Araport11)	protein_coding			-0.692394	5.23281	15.3202	9.074e-05
AT1G69250	AT1G69250.1	Nuclear transport factor 2 (NTF2) family protein with RNA binding (RRM-RBD-RNP motifs) domain-containing protein;(source:Araport11)	protein_coding			-0.432264	5.62684	15.348	8.94162e-05
AT2G18570	AT2G18570.1	UDP-Glycosyltransferase superfamily protein;(source:Araport11)	protein_coding			-0.460899	5.33114	15.4132	8.63847e-05
AT5G39850	AT5G39850.1	Ribosomal protein S4;(source:Araport11)	protein_coding			-0.45396	4.9296	15.4242	8.58808e-05
AT5G57785	AT5G57785.1	hypothetical protein;(source:Araport11)	protein_coding			-0.852637	5.39328	15.4265	8.5777e-05
AT5G04800	AT5G04800.1	Ribosomal S17 family protein;(source:Araport11)	protein_coding			-0.401236	7.21957	15.4647	8.40602e-05
AT2G40590	AT2G40590.1	Ribosomal protein S26e family protein;(source:Araport11)	protein_coding			-0.550932	6.38072	15.4927	8.28248e-05
AT1G54575	AT1G54575.1	hypothetical protein;(source:Araport11)	protein_coding			-0.929514	3.32961	15.5466	8.04962e-05
AT1G22410	AT1G22410.1	Class-II DAHP synthetase family protein;(source:Araport11)	protein_coding			-0.594478	8.2472	15.5723	7.94106e-05
AT3G57000	AT3G57000.1	nucleolar essential protein-like protein;(source:Araport11)	protein_coding			-0.439127	5.23806	15.5883	7.87412e-05
AT4G38150	AT4G38150.1	Pentatricopeptide repeat (PPR) superfamily protein;(source:Araport11)	protein_coding			-0.637169	3.38815	15.5935	7.85235e-05
AT3G51010	AT3G51010.1	protein translocase subunit;(source:Araport11)	protein_coding			-0.373058	5.42284	15.6133	7.77055e-05
AT3G20370	AT3G20370.1	TRAF-like family protein;(source:Araport11)	protein_coding			-0.393972	8.45883	15.6237	7.72797e-05
AT5G59460	AT5G59460.1	scarecrow-like transcription factor 11 (SCL11);(source:Araport11)	protein_coding			-0.496424	3.8043	15.6404	7.66024e-05
AT2G21290	AT2G21290.1	30S ribosomal protein S31;(source:Araport11)	protein_coding			-0.449691	5.36849	15.652	7.61324e-05
AT1G05650	AT1G05650.1	Pectin lyase-like superfamily protein;(source:Araport11)	protein_coding			-0.650389	4.17493	15.6763	7.51606e-05
AT3G11510	AT3G11510.1	Ribosomal protein S11 family protein;(source:Araport11)	protein_coding			-0.438598	8.02061	15.6865	7.47564e-05
AT1G76550	AT1G76550.1	Phosphofructokinase family protein. Target of miRNA sRNA6.	protein_coding			-0.422149	6.29028	15.7325	7.29583e-05
AT3G44010	AT3G44010.1	Ribosomal protein S14p/S29e family protein;(source:Araport11)	protein_coding			-0.450669	7.44358	15.7522	7.22053e-05
AT3G15650	AT3G15650.2	alpha/beta-Hydrolases superfamily protein;(source:Araport11)	protein_coding			-1.07687	2.881	15.765	7.17162e-05
AT1G52905	AT1G52905.1	hypothetical protein;(source:Araport11)	protein_coding			-0.620467	3.43358	15.8124	6.99441e-05
AT5G64670	AT5G64670.1	Ribosomal protein L18e/L15 superfamily protein;(source:Araport11)	protein_coding			-0.443973	5.45042	15.8449	6.87521e-05
AT1G01210	AT1G01210.1	DNA-directed RNA polymerase, subunit M, archaeal;(source:Araport11)	protein_coding			-0.659116	3.12187	15.9374	6.54728e-05
AT3G52580	AT3G52580.1	Ribosomal protein S11 family protein;(source:Araport11)	protein_coding			-0.475725	6.86829	15.9707	6.43317e-05
AT4G13615	AT4G13615.1	Uncharacterized protein family SERF;(source:Araport11)	protein_coding			-0.387387	7.67606	16.0401	6.20156e-05
AT1G64380	AT1G64380.1	encodes a member of the DREB subfamily A-6 of ERF/AP2 transcription factor family. The protein contains one AP2 domain. There are 8 members in this subfamily including RAP2.4.	protein_coding			-0.824441	3.96585	16.0591	6.13961e-05
AT5G52650	AT5G52650.1	RNA binding Plectin/S10 domain-containing protein;(source:Araport11)	protein_coding			-0.435225	7.74925	16.0696	6.10576e-05
AT5G16010	AT5G16010.1	3-oxo-5-alpha-steroid 4-dehydrogenase family protein;(source:Araport11)	protein_coding			-0.659248	5.34982	16.0744	6.09018e-05
AT4G13990	AT4G13990.1	Exostosin family protein;(source:Araport11)	protein_coding			-0.50369	3.85503	16.0846	6.05741e-05
AT5G47210	AT5G47210.1	Hyaluronan / mRNA binding family;(source:Araport11)	protein_coding			-0.384906	8.99676	16.0903	6.03914e-05
AT5G42150	AT5G42150.1	Glutathione S-transferase family protein;(source:Araport11)	protein_coding			-0.505852	5.24328	16.1074	5.98511e-05
AT5G65320	AT5G65320.1	basic helix-loop-helix (bHLH) DNA-binding superfamily protein;(source:Araport11)	protein_coding			-1.06155	2.1405	16.2326	5.60226e-05
AT5G17522	AT5G17522.1	phosphoglucosamine mutase family protein;(source:Araport11)	protein_coding			-1.88365	0.0631017	16.2549	5.53654e-05
AT3G06700	AT3G06700.1	Ribosomal L29e protein family;(source:Araport11)	protein_coding			-0.426042	7.64371	16.2725	5.48529e-05
AT4G02340	AT4G02340.1	alpha/beta-Hydrolases superfamily protein;(source:Araport11)	protein_coding			-0.428151	5.12431	16.2765	5.47376e-05
AT2G35390	AT2G35390.2	Phosphoribosyltransferase family protein;(source:Araport11)	protein_coding			-0.56361	4.43312	16.3046	5.39321e-05
AT3G55750	AT3G55750.1	Ribosomal protein L35Ae family protein;(source:Araport11)	protein_coding			-0.489316	7.1488	16.3797	5.18365e-05
AT5G15750	AT5G15750.1	Alpha-L RNA-binding motif/Ribosomal protein S4 family protein;(source:Araport11)	protein_coding			-0.512243	4.78514	16.473	4.9348e-05
AT1G15760	AT1G15760.1	Sterile alpha motif (SAM) domain-containing protein;(source:Araport11)	protein_coding			-0.834063	2.6849	16.5362	4.7729e-05
AT5G41460	AT5G41460.1	transferring glycosyl group transferase (DUF604);(source:Araport11)	protein_coding			-0.78379	2.74155	16.5742	4.67841e-05
AT3G44940	AT3G44940.1	enabled-like protein (DUF1635);(source:Araport11)	protein_coding			-0.65677	4.21437	16.5892	4.64139e-05
AT1G14060	AT1G14060.1	GCK domain-containing protein;(source:Araport11)	protein_coding			-0.586912	4.76601	16.6097	4.59144e-05
AT4G32605	AT4G32605.1	Mitochondrial glycoprotein family protein;(source:Araport11)	protein_coding			-0.559677	4.40665	16.6465	4.50331e-05
AT1G75945	AT1G75945.1	hypothetical protein;(source:Araport11)	protein_coding			-0.567037	3.01919	16.6991	4.38022e-05
AT1G20950	AT1G20950.1	Phosphofructokinase family protein;(source:Araport11)	protein_coding			-0.589105	6.98636	16.8002	4.15288e-05
AT1G29418	AT1G29418.1	transmembrane protein;(source:Araport11)	protein_coding			-0.477713	5.21469	16.8106	4.13027e-05
AT2G25210	AT2G25210.1	Ribosomal protein L39 family protein;(source:Araport11)	protein_coding			-0.440213	6.54522	16.8124	4.12619e-05
AT4G24830	AT4G24830.1	arginosuccinate synthase family;(source:Araport11)	protein_coding			-0.50646	6.39418	16.9062	3.92722e-05
AT2G12462	AT2G12462.1	sterile alpha motif (SAM) domain protein;(source:Araport11)	protein_coding			-0.610529	4.60441	16.9945	3.74875e-05
AT5G48760	AT5G48760.1	Ribosomal protein L13 family protein;(source:Araport11)	protein_coding			-0.423795	6.64744	17.0073	3.72363e-05
AT2G34610	AT2G34610.1	cotton fiber protein;(source:Araport11)	protein_coding			-1.04339	3.76512	17.0166	3.70545e-05
AT2G41190	AT2G41190.1	Transmembrane amino acid transporter family protein;(source:Araport11)	protein_coding			-0.833373	3.20956	17.1706	3.41687e-05
AT2G27710	AT2G27710.1	60S acidic ribosomal protein family;(source:Araport11)	protein_coding			-0.455262	8.41569	17.2814	3.22324e-05
AT3G15250	AT3G15250.1	TPRXL;(source:Araport11)	protein_coding			-0.90412	2.46504	17.3407	3.12427e-05
AT5G59480	AT5G59480.1	Haloacid dehalogenase-like hydrolase (HAD) superfamily protein;(source:Araport11)	protein_coding			-0.641391	4.05121	17.3499	3.10919e-05
AT3G53870	AT3G53870.1	Ribosomal protein S3 family protein;(source:Araport11)	protein_coding			-0.38979	8.18685	17.3606	3.09164e-05
AT3G63090	AT3G63090.1	Ubiquitin carboxyl-terminal hydrolase family protein;(source:Araport11)	protein_coding			-0.699488	3.00707	17.6064	2.71666e-05
AT2G44370	AT2G44370.1	Cysteine/Histidine-rich C1 domain family protein;(source:Araport11)	protein_coding			-0.6793	5.46143	17.621	2.69589e-05
AT5G22930	AT5G22930.1	enabled-like protein (DUF1635);(source:Araport11)	protein_coding			-1.26439	3.59306	17.6294	2.68401e-05
AT2G14860	AT2G14860.1	Peroxisomal membrane 22 kDa (Mpv17/PMP22) family protein;(source:Araport11)	protein_coding			-0.890357	2.30094	17.6462	2.66053e-05
AT5G03850	AT5G03850.1	Nucleic acid-binding, OB-fold-like protein;(source:Araport11)	protein_coding			-0.399611	7.21776	17.6531	2.65089e-05
AT1G29320	AT1G29320.1	Transducin/WD40 repeat-like superfamily protein;(source:Araport11)	protein_coding			-0.557845	4.72511	17.808	2.44356e-05
AT1G13810	AT1G13810.1	Restriction endonuclease, type II-like superfamily protein;(source:Araport11)	protein_coding			-0.609133	3.26181	17.8435	2.39839e-05
AT5G02610	AT5G02610.2	Ribosomal L29 family protein;(source:Araport11)	protein_coding			-0.463241	6.74578	17.8984	2.33017e-05
AT5G02740	AT5G02740.1	Ribosomal protein S24e family protein;(source:Araport11)	protein_coding			-0.44875	5.45295	17.9663	2.24855e-05
AT3G18600	AT3G18600.1	P-loop containing nucleoside triphosphate hydrolases superfamily protein;(source:Araport11)	protein_coding			-0.532082	5.8841	18.1311	2.06209e-05
AT1G26880	AT1G26880.1	Ribosomal protein L34e superfamily protein;(source:Araport11)	protein_coding			-0.487423	7.06531	18.2092	1.97922e-05
AT4G36130	AT4G36130.1	Ribosomal protein L2 family;(source:Araport11)	protein_coding			-0.429513	7.71774	18.2318	1.95587e-05
AT1G78820	AT1G78820.1	D-mannose binding lectin protein with Apple-like carbohydrate-binding domain-containing protein;(source:Araport11)	protein_coding			-1.72888	0.714737	18.2817	1.90527e-05
AT5G50370	AT5G50370.1	Adenylate kinase family protein;(source:Araport11)	protein_coding			-0.636257	5.14821	18.2837	1.90332e-05
AT5G01790	AT5G01790.1	hypothetical protein;(source:Araport11)	protein_coding			-0.916279	2.48039	18.3093	1.87787e-05
AT2G39390	AT2G39390.1	Ribosomal L29 family protein;(source:Araport11)	protein_coding			-0.471594	7.06651	18.496	1.70265e-05
AT1G23100	AT1G23100.1	GroES-like family protein;(source:Araport11)	protein_coding			-0.763899	3.31642	18.5432	1.661e-05
AT2G40510	AT2G40510.1	Ribosomal protein S26e family protein;(source:Araport11)	protein_coding			-0.486945	7.06592	18.5687	1.63893e-05
AT4G15000	AT4G15000.1	Ribosomal L27e protein family;(source:Araport11)	protein_coding			-0.491706	8.50777	18.6917	1.53654e-05
AT2G32220	AT2G32220.1	Ribosomal L27e protein family;(source:Araport11)	protein_coding			-0.958458	3.18508	18.8353	1.42507e-05
AT5G67510	AT5G67510.1	Translation protein SH3-like family protein;(source:Araport11)	protein_coding			-0.51431	6.1534	19.062	1.26541e-05
AT5G14050	AT5G14050.1	Transducin/WD40 repeat-like superfamily protein;(source:Araport11)	protein_coding			-0.420194	5.72035	19.1457	1.21108e-05
AT3G43980	AT3G43980.1	Ribosomal protein S14p/S29e family protein;(source:Araport11)	protein_coding			-0.491604	4.8909	19.1932	1.18134e-05
AT1G50050	AT1G50050.1	CAP (Cysteine-rich secretory proteins, Antigen 5, and Pathogenesis-related 1 protein) superfamily protein;(source:Araport11)	protein_coding			-1.55655	-0.00226161	19.3383	1.09489e-05
AT5G61170	AT5G61170.1	Ribosomal protein S19e family protein;(source:Araport11)	protein_coding			-0.592545	7.86189	19.3615	1.08164e-05
AT3G05560	AT3G05560.1	Ribosomal L22e protein family;(source:Araport11)	protein_coding			-0.55542	7.81556	19.4109	1.05405e-05
AT3G01800	AT3G01800.1	Ribosome recycling factor;(source:Araport11)	protein_coding			-0.526516	4.22993	19.5124	9.99501e-06
AT4G17390	AT4G17390.1	Ribosomal protein L23/L15e family protein;(source:Araport11)	protein_coding			-0.412396	8.78789	19.5256	9.92584e-06
AT5G45775	AT5G45775.2	Ribosomal L5P family protein;(source:Araport11)	protein_coding			-0.529708	7.52253	19.8502	8.37523e-06
AT2G39670	AT2G39670.2	Radical SAM superfamily protein;(source:Araport11)	protein_coding			-0.488326	5.06628	19.9028	8.14794e-06
AT4G10620	AT4G10620.1	P-loop containing nucleoside triphosphate hydrolases superfamily protein;(source:Araport11)	protein_coding			-0.62961	3.92794	19.9165	8.08998e-06
AT3G08520	AT3G08520.1	Ribosomal protein L41 family;(source:Araport11)	protein_coding			-0.681336	6.10226	19.9357	8.00918e-06
AT2G22230	AT2G22230.1	Thioesterase superfamily protein;(source:Araport11)	protein_coding			-0.48339	4.67394	19.96	7.908e-06
AT3G48240	AT3G48240.1	Octicosapeptide/Phox/Bem1p family protein;(source:Araport11)	protein_coding			-1.61274	1.0507	19.9632	7.89482e-06
AT2G14460	AT2G14460.1	hypothetical protein;(source:Araport11)	protein_coding			-0.853398	3.78848	19.9982	7.75149e-06
AT5G22100	AT5G22100.1	RNA cyclase family protein;(source:Araport11)	protein_coding			-0.870933	4.25087	20.2508	6.79264e-06
AT4G23620	AT4G23620.2	Ribosomal protein L25/Gln-tRNA synthetase, anti-codon-binding domain-containing protein;(source:Araport11)	protein_coding			-0.777912	4.66774	20.2954	6.63605e-06
AT1G41880	AT1G41880.1	Ribosomal protein L35Ae family protein;(source:Araport11)	protein_coding			-0.50601	6.51183	20.3137	6.5729e-06
AT1G54890	AT1G54890.1	Late embryogenesis abundant (LEA) protein-like protein;(source:Araport11)	protein_coding			-0.892182	4.00427	20.5327	5.86211e-06
AT1G09390	AT1G09390.1	GDSL-motif esterase/acyltransferase/lipase. Enzyme group with broad substrate specificity that may catalyze acyltransfer or hydrolase reactions with lipid and non-lipid substrates.	protein_coding			-0.639574	3.86594	20.627	5.58041e-06
AT3G12390	AT3G12390.1	Nascent polypeptide-associated complex (NAC), alpha subunit family protein;(source:Araport11)	protein_coding			-0.4056	6.91581	20.6735	5.44658e-06
AT4G15770	AT4G15770.1	RNA binding protein;(source:Araport11)	protein_coding			-0.589327	5.71069	20.7567	5.21482e-06
AT3G57490	AT3G57490.1	Ribosomal protein S5 family protein;(source:Araport11)	protein_coding			-0.686015	5.26952	20.8321	5.01348e-06
AT5G23100	AT5G23100.1	MIZU-KUSSEI-like protein (Protein of unknown function, DUF617);(source:Araport11)	protein_coding			-0.54078	4.2591	20.8357	5.00408e-06
AT5G59850	AT5G59850.1	Ribosomal protein S8 family protein;(source:Araport11)	protein_coding			-0.689608	7.45265	20.862	4.936e-06
AT3G10080	AT3G10080.1	RmlC-like cupins superfamily protein;(source:Araport11)	protein_coding			-0.674672	3.79051	20.8907	4.86253e-06
AT5G38890	AT5G38890.1	Nucleic acid-binding, OB-fold-like protein;(source:Araport11)	protein_coding			-0.779262	3.71746	20.8979	4.84427e-06
AT2G27775	AT2G27775.2	PPR containing protein;(source:Araport11)	protein_coding			-0.68519	3.76235	20.9239	4.77883e-06
AT1G28395	AT1G28395.2	hypothetical protein;(source:Araport11)	protein_coding			-0.561996	4.40649	20.9999	4.59318e-06
AT5G17190	AT5G17190.1	B-cell receptor-associated-like protein;(source:Araport11)	protein_coding			-0.555024	6.25987	21.2544	4.02189e-06
AT3G57010	AT3G57010.1	Calcium-dependent phosphotriesterase superfamily protein;(source:Araport11)	protein_coding			-0.883807	6.50667	21.5214	3.49901e-06
AT2G42770	AT2G42770.1	Peroxisomal membrane 22 kDa (Mpv17/PMP22) family protein;(source:Araport11)	protein_coding			-0.771682	3.97382	21.7575	3.09372e-06
AT3G06035	AT3G06035.1	Glycoprotein membrane precursor GPI-anchored;(source:Araport11)	protein_coding			-0.55261	5.78178	21.7781	3.06069e-06
AT3G58700	AT3G58700.1	Ribosomal L5P family protein;(source:Araport11)	protein_coding			-0.489053	6.25608	21.9374	2.81697e-06
AT4G11630	AT4G11630.1	Ribosomal protein L19 family protein;(source:Araport11)	protein_coding			-0.47803	4.65557	22.1135	2.57e-06
AT1G80720	AT1G80720.1	Mitochondrial glycoprotein family protein;(source:Araport11)	protein_coding			-0.791038	3.30501	22.142	2.53211e-06
AT5G23250	AT5G23250.1	Succinyl-CoA ligase, alpha subunit;(source:Araport11)	protein_coding			-0.471618	5.63858	22.2421	2.40348e-06
AT5G47980	AT5G47980.1	HXXXD-type acyl-transferase family protein;(source:Araport11)	protein_coding			-1.29893	4.53633	22.3197	2.3083e-06
AT5G01610	AT5G01610.1	hypothetical protein (Protein of unknown function, DUF538);(source:Araport11)	protein_coding			-0.509862	4.15434	22.3248	2.30217e-06
AT3G25130	AT3G25130.1	acidic leucine-rich nuclear phosphoprotein 32 family B protein;(source:Araport11)	protein_coding			-0.766285	3.11215	22.4165	2.19479e-06
AT4G22380	AT4G22380.1	Ribosomal protein L7Ae/L30e/S12e/Gadd45 family protein;(source:Araport11)	protein_coding			-0.757966	3.93507	22.4337	2.17524e-06
AT4G37530	AT4G37530.1	Peroxidase superfamily protein;(source:Araport11)	protein_coding			-0.482977	5.87938	22.5078	2.09297e-06
AT1G48610	AT1G48610.1	AT hook motif-containing protein;(source:Araport11)	protein_coding			-0.519152	4.65938	23.1704	1.48258e-06
AT1G06540	AT1G06540.1	hypothetical protein;(source:Araport11)	protein_coding			-1.52572	1.83256	23.4066	1.3113e-06
AT3G60245	AT3G60245.1	Zinc-binding ribosomal protein family protein;(source:Araport11)	protein_coding			-0.455586	8.72367	23.888	1.02107e-06
AT5G51220	AT5G51220.1	ubiquinol-cytochrome C chaperone family protein;(source:Araport11)	protein_coding			-0.592607	4.80083	24.7039	6.68498e-07
AT3G54780	AT3G54780.1	Zinc finger (C3HC4-type RING finger) family protein;(source:Araport11)	protein_coding			-0.923784	3.43761	24.8436	6.21747e-07
AT5G20160	AT5G20160.2	Ribosomal protein L7Ae/L30e/S12e/Gadd45 family protein;(source:Araport11)	protein_coding			-0.65975	6.34467	24.9348	5.93009e-07
AT3G10610	AT3G10610.1	Ribosomal S17 family protein;(source:Araport11)	protein_coding			-0.581564	5.87712	25.0837	5.48939e-07
AT1G03820	AT1G03820.1	E6-like protein;(source:Araport11)	protein_coding			-0.710343	5.59013	25.5214	4.37513e-07
AT5G60650	AT5G60650.1	proline-rich receptor-like kinase;(source:Araport11)	protein_coding			-1.12215	1.88581	25.5675	4.27168e-07
AT1G48750	AT1G48750.1	Bifunctional inhibitor/lipid-transfer protein/seed storage 2S albumin superfamily protein;(source:Araport11)	protein_coding			-0.733858	7.8684	25.6284	4.13894e-07
AT5G20130	AT5G20130.1	sulfate adenylyltransferase subunit;(source:Araport11)	protein_coding			-0.535379	4.52871	25.889	3.61632e-07
AT1G14630	AT1G14630.1	XRI1-like protein;(source:Araport11)	protein_coding			-1.1847	3.26611	26.2269	3.03566e-07
AT5G09510	AT5G09510.1	Ribosomal protein S19 family protein;(source:Araport11)	protein_coding			-0.557537	6.95673	26.5372	2.58514e-07
AT2G21580	AT2G21580.1	Ribosomal protein S25 family protein;(source:Araport11)	protein_coding			-0.449311	7.35661	26.7528	2.31214e-07
AT3G07230	AT3G07230.1	wound-responsive protein-like protein;(source:Araport11)	protein_coding			-0.580519	6.09595	27.0626	1.96974e-07
AT4G16790	AT4G16790.1	hydroxyproline-rich glycoprotein family protein;(source:Araport11)	protein_coding			-0.59878	4.67422	27.0765	1.95556e-07
AT4G00670	AT4G00670.1	Remorin family protein;(source:Araport11)	protein_coding			-0.958543	4.20294	27.1626	1.87037e-07
AT1G09590	AT1G09590.1	Translation protein SH3-like family protein;(source:Araport11)	protein_coding			-0.562611	8.10478	27.5842	1.50403e-07
AT2G37980	AT2G37980.1	O-fucosyltransferase family protein;(source:Araport11)	protein_coding			-0.830912	4.92939	28.2576	1.06194e-07
AT3G62530	AT3G62530.1	ARM repeat superfamily protein;(source:Araport11)	protein_coding			-0.568284	6.47677	28.3605	1.00702e-07
AT5G20885	AT5G20885.1	RING/U-box superfamily protein;(source:Araport11)	protein_coding			-0.613419	5.80116	28.4867	9.43437e-08
AT5G18840	AT5G18840.1	Major facilitator superfamily protein;(source:Araport11)	protein_coding			-0.775743	5.03448	29.0047	7.22034e-08
AT2G41650	AT2G41650.1	hypothetical protein;(source:Araport11)	protein_coding			-0.630722	5.65935	29.1051	6.85575e-08
AT1G65030	AT1G65030.1	This gene is predicted to encode a protein with a DWD motif. It can bind to DDB1a in Y2H assays, and DDB1b in co-IP assays, and may be involved in the formation of a CUL4-based E3 ubiquitin ligase	protein_coding			-0.660293	4.41391	29.7824	4.83358e-08
AT2G40480	AT2G40480.1	WEB family protein (DUF827);(source:Araport11)	protein_coding			-0.557765	5.79102	30.544	3.26376e-08
AT1G08580	AT1G08580.1	hypothetical protein;(source:Araport11)	protein_coding			-0.765225	5.2908	31.1591	2.37717e-08
AT4G38660	AT4G38660.1	Pathogenesis-related thaumatin superfamily protein;(source:Araport11)	protein_coding			-0.609216	5.76499	31.2531	2.26488e-08
AT2G22590	AT2G22590.1	UDP-Glycosyltransferase superfamily protein;(source:Araport11)	protein_coding			-2.80329	4.75331	32.1545	1.42389e-08
AT4G31790	AT4G31790.2	Tetrapyrrole (Corrin/Porphyrin) Methylase;(source:Araport11)	protein_coding			-0.598429	4.86719	32.4632	1.21468e-08
AT5G08180	AT5G08180.1	Ribosomal protein L7Ae/L30e/S12e/Gadd45 family protein;(source:Araport11)	protein_coding			-0.687126	6.42732	32.9026	9.68936e-09
AT2G34060	AT2G34060.1	Peroxidase superfamily protein;(source:Araport11)	protein_coding			-0.909416	3.50948	32.9078	9.66364e-09
AT5G28500	AT5G28500.1	rubisco accumulation factor-like protein;(source:Araport11)	protein_coding			-0.713045	3.79098	33.3213	7.81229e-09
AT2G20450	AT2G20450.1	Ribosomal protein L14;(source:Araport11)	protein_coding			-0.696871	6.65033	33.404	7.48684e-09
AT2G28410	AT2G28410.1	transmembrane protein;(source:Araport11)	protein_coding			-0.74728	4.06152	33.6943	6.44888e-09
AT3G06680	AT3G06680.1	Ribosomal L29e protein family;(source:Araport11)	protein_coding			-0.925095	5.18341	35.5716	2.45848e-09
AT5G61310	AT5G61310.1	Cytochrome c oxidase subunit Vc family protein;(source:Araport11)	protein_coding			-0.761292	3.84403	36.2852	1.70453e-09
AT1G68470	AT1G68470.1	Exostosin family protein;(source:Araport11)	protein_coding			-0.872225	3.88015	38.1021	6.71363e-10
AT3G16080	AT3G16080.1	Zinc-binding ribosomal protein family protein;(source:Araport11)	protein_coding			-0.677029	6.93535	38.122	6.64559e-10
AT1G06550	AT1G06550.1	ATP-dependent caseinolytic (Clp) protease/crotonase family protein;(source:Araport11)	protein_coding			-0.76067	7.09696	38.184	6.43796e-10
AT3G61820	AT3G61820.1	Eukaryotic aspartyl protease family protein;(source:Araport11)	protein_coding			-0.977414	6.52406	41.0628	1.47413e-10
AT5G17010	AT5G17010.1	Major facilitator superfamily protein;(source:Araport11)	protein_coding			-1.0695	5.91783	45.6597	1.40688e-11
AT3G10090	AT3G10090.1	Nucleic acid-binding, OB-fold-like protein;(source:Araport11)	protein_coding			-0.858102	4.37078	49.2571	2.24516e-12
AT1G14960	AT1G14960.1	Polyketide cyclase/dehydrase and lipid transport superfamily protein;(source:Araport11)	protein_coding		BRASSIKIN1 (BKN1)	-0.932886	4.73133	49.9642	1.56574e-12
AT5G01740	AT5G01740.1	Unknown gene, induced by abiotic stress treatments.	protein_coding			-1.4006	2.37895	51.0285	9.10365e-13
AT5G62210	AT5G62210.1	Embryo-specific protein 3, (ATS3);(source:Araport11)	protein_coding			-1.59344	5.06587	52.301	4.76134e-13
AT5G17040	AT5G17040.1	UDP-Glycosyltransferase superfamily protein;(source:Araport11)	protein_coding			-1.66354	3.67719	53.9657	2.04019e-13
AT5G07030	AT5G07030.1	Eukaryotic aspartyl protease family protein;(source:Araport11)	protein_coding			-0.790205	8.23293	55.096	1.14785e-13
AT5G22020	AT5G22020.1	Calcium-dependent phosphotriesterase superfamily protein;(source:Araport11)	protein_coding			-1.35681	7.35472	64.7565	8.47496e-16
AT1G25530	AT1G25530.1	Transmembrane amino acid transporter family protein;(source:Araport11)	protein_coding			-1.14025	5.61649	64.7603	8.4588e-16
AT1G03410	AT1G03410.1	2-oxoglutarate (2OG) and Fe(II)-dependent oxygenase superfamily protein;(source:Araport11)	protein_coding	(2A6)	(2A6)	-0.436971	5.25956	16.9216	3.89556e-05
AT4G00370	AT4G00370.1	Encodes an inorganic phosphate transporter (PHT4;4) that can transport ascorbate and is located in the chloroplast envelope membrane. It has been shown to play a role in the xanthophyll cycle during photosynthesis and may be required for tolerance to strong light stress.	protein_coding	(ANTR2)	(ANTR2); (ATPHT4;4);ANION TRANSPORTER 2 (PHT4;4)	-0.655786	5.8006	35.8493	2.13182e-09
AT2G43130	AT2G43130.1	encodes a protein belonging to the Rab/Ypt family of small GTPases, which are implicated in intracellular vesicular traffic.	protein_coding	(ARA4)	(ARA4); (RABA5C);ARABIDOPSIS RAB GTPASE HOMOLOG A5C (ATRABA5C); (ARA-4); (ATRAB11F)	-0.443833	4.52048	13.5455	0.000232848
AT2G47170	AT2G47170.1	Gene encoding ADP-ribosylation factor and similar to other ARFs and ARF-like proteins. Members of this family are known to be essential for vesicle coating and uncoating and functions in GTP-binding. The gene is shown to play a role in cell division, cell expansion and cellulose production using antisense construct. The mRNA is cell-to-cell mobile.	protein_coding	(ARF1A1C)	BFA-VISUALIZED EXOCYTIC TRAFFICKING DEFECTIVE 1 (BEX1); (ARF1A1C)	-0.31444	7.92032	12.8192	0.000343073
AT1G20220	AT1G20220.1	Alba DNA/RNA-binding protein;(source:Araport11)	protein_coding	(ATALBA2)	(ATALBA2); (ALBA2)	-0.414133	6.43284	15.3693	8.84142e-05
AT3G62600	AT3G62600.1	J domain protein localized in ER lumen. Can partially compensate for the growth defect in jem1 scj1 mutant yeast. Forms a complex SDF2-ERdj3B-BiP that is required for the proper accumulation of the surface-exposed leucine-rich repeat receptor kinases EFR. EFR is involved in PAMP (pathogen associated molecular patterns) triggered immunity.	protein_coding	(ATERDJ3B)	(ERDJ3B); (ATERDJ3B)	-0.318915	6.70066	8.4923	0.00356653
AT3G51800	AT3G51800.2	putative nuclear DNA-binding protein G2p (AtG2) mRNA,	protein_coding	(ATG2)	(G2P);A. THALIANA ERBB-3 BINDING PROTEIN 1 (ATEBP1);ERBB-3 BINDING PROTEIN 1 (EBP1); (ATG2)	-0.417433	7.40838	11.9942	0.000533661
AT3G62760	AT3G62760.1	Encodes glutathione transferase belonging to the phi class of GSTs. Naming convention according to Wagner et al. (2002).	protein_coding	(ATGSTF13)	(ATGSTF13)	-0.565285	2.92291	7.82019	0.00516657
AT1G31860	AT1G31860.1	encodes a bifunctional protein that has phosphoribosyl-ATP pyrophosphohydrolase (PRA-PH) and phosphoribosyl-AMP cyclohydrolase (PRA-CH) activities.	protein_coding	(AT-IE)	(AT-IE);HISTIDINE BIOSYNTHESIS 2 (HISN2)	-0.365859	4.65526	12.4139	0.000426153
AT2G31140	AT2G31140.1	Peptidase S24/S26A/S26B/S26C family protein;(source:Araport11)	protein_coding	(ATIMP2)	(ATIMP2)	-0.311486	5.13164	10.3011	0.00132953
AT3G46430	AT3G46430.1	Mitochondrial F1F0-ATP synthase.	protein_coding	(ATMTATP6)	(ATMTATP6)	-0.472963	6.26665	12.9976	0.000311886
AT3G47380	AT3G47380.1	Pectin methylesterase inhibitor that is involved in resistance to Botrytis cinerea. Affects PME activity during infection to prevent disease.	protein_coding	(ATPMEI11)	(ATPMEI11)	-1.12274	1.30125	10.9026	0.000960296
AT1G45050	AT1G45050.1	member of ubiquitin-conjugating E2-proteins	protein_coding	(ATUBC2-1)	(ATUBC2-1);ARABIDOPSIS THALIANA UBIQUITIN-CONJUGATING ENZYME 15 (UBC15)	-0.50088	3.31502	8.62793	0.00331047
AT5G51780	AT5G51780.1	basic helix-loop-helix (bHLH) DNA-binding superfamily protein;(source:Araport11)	protein_coding	(BHLH)	(BHLH)	-0.580493	6.11868	19.8309	8.46053e-06
AT4G31810	AT4G31810.1	ATP-dependent caseinolytic (Clp) protease/crotonase family protein;(source:Araport11)	protein_coding	(CHY4)	(CHY4)	-0.417226	5.30954	9.4332	0.00213092
AT1G19140	AT1G19140.2	ubiquinone biosynthesis COQ9-like protein;(source:Araport11)	protein_coding	(COQ9)	(COQ9)	-0.327254	5.59548	9.04684	0.00263149
AT5G18820	AT5G18820.1	Encodes a subunit of chloroplasts chaperonins that are involved in mediating the folding of newly synthesized, translocated, or stress-denatured proteins. Cpn60 subunits are: Cpn60alpha1 (At2g28000), AtCpn60alpha2 (At5g18820), AtCpn60beta1 (At1g55490), AtCpn60beta2 (At3g13470), AtCpn60beta3 (At5g56500), AtCpn60beta4 (At1g26230).	protein_coding	(CPNA2)	EMBRYO DEFECTIVE 3007 (EMB3007);CHAPERONIN-60ALPHA2 (CPN60ALPHA2); (CPNA2); (CPN60A2)	-0.896239	2.95042	20.7762	5.16207e-06
AT2G04030	AT2G04030.1	Encodes a chloroplast-targeted 90-kDa heat shock protein located in the stroma involved in red-light mediated deetiolation response and crucial for protein import into the chloroplast stroma. Mutants are resistant to chlorate, have elongated hypocotyls in light, and affect the expression of NR2, CAB, and RBCS but NOT NR1 and NiR.	protein_coding	(CR88)	(CR88);EMBRYO DEFECTIVE 1956 (emb1956);HEAT SHOCK PROTEIN 90.5 (HSP90.5); (HSP90C);HEAT SHOCK PROTEIN 90.5 (AtHsp90.5); (ATHSP90C);HEAT SHOCK PROTEIN 88.1 (Hsp88.1)	-0.30634	7.33908	8.03075	0.00459898
AT5G62440	AT5G62440.1	Encodes a protein DOMINO1 that belongs to a plant-specific gene family sharing a common motif present in the tomato DEFECTIVE CHLOROPLASTS AND LEAVES (LeDCL) protein. DOMINO1 is located in the nucleus. Arabidopsis embryos carrying the domino1 mutation grow slowly in comparison with wild type embryos and reach only the globular stage at desiccation. The primary defect of the mutation at the cellul…	protein_coding	(DOM1)	(EMB514); (DOM1)	-0.664326	5.3295	28.2489	1.06674e-07
AT2G04390	AT2G04390.1	Ribosomal S17 family protein;(source:Araport11)	protein_coding	(DS17)	(DS17)	-0.485221	7.13676	22.4776	2.12611e-06
AT1G07940	AT1G07940.1	GTP binding Elongation factor Tu family protein;(source:Araport11)	protein_coding	(EF1A)	(EF1A)	-0.278671	9.29142	9.46028	0.00209969
AT5G60390	AT5G60390.1	GTP binding Elongation factor Tu family protein;(source:Araport11)	protein_coding	(EF1ALPHA)	(EF1ALPHA)	-0.287932	10.9119	7.91853	0.00489311
AT5G11480	AT5G11480.1	P-loop containing nucleoside triphosphate hydrolases superfamily protein;(source:Araport11)	protein_coding	(ENGB-2)	(ENGB-2)	-0.431978	4.21642	16.6779	4.42949e-05
AT1G18060	AT1G18060.1	localized to chloroplasts	protein_coding	(FBN-LIKE)	(FBN-LIKE)	-0.475555	4.15467	9.97005	0.00159107
AT5G13480	AT5G13480.2	Encodes a protein with similarity to yeast Pfs2p, an mRNA processing factor. Involved in regulation of flowering time; affects FCA mRNA processing. Homozygous mutants are late flowering, null alleles are embryo lethal.	protein_coding	(FY)	(WDR33); (FY)	-0.370731	4.54458	8.02127	0.00462311
AT2G27840	AT2G27840.1	Belongs to the plant specific HD2 type proteins; similar to nucleolar Zea mays histone deacetylase; HD2-p39	protein_coding	(HDT4)	(HDT4);HISTONE DEACETYLASE 2D (HD2D); (HDT04);HISTONE DEACETYLASE 13 (HDA13)	-1.01081	5.65284	23.4031	1.31367e-06
AT5G24580	AT5G24580.1	Heavy metal transport/detoxification superfamily protein;(source:Araport11)	protein_coding	(HIPP09)	HEAVY METAL ASSOCIATED PROTEIN 47 (ATHMP47); (HIPP09)	-0.819039	4.31088	52.7016	3.88266e-13
AT1G07790	AT1G07790.1	Encodes a histone 2B (H2B) protein.	protein_coding	(HTB1)	(HTB1)	-0.587259	5.45549	16.7979	4.15793e-05
AT5G10390	AT5G10390.1	Histone superfamily protein;(source:Araport11)	protein_coding	(HTR13)	(HTR13);HISTONE 3.1 (H3.1); (HTR9)	-0.711314	4.19359	12.2277	0.000470851
AT5G61220	AT5G61220.1	LYR family of Fe/S cluster biogenesis protein;(source:Araport11)	protein_coding	(ISD11)	(LYRM4); (ISD11)	-0.486912	4.44521	17.5182	2.84568e-05
AT5G15970	AT5G15970.1	Encodes a gene that can be induced by cold and abscisic acid and may be involved in cold acclimation and salt tolerance. The mRNA is cell-to-cell mobile.	protein_coding	(KIN2)	(KIN2); (AtCor6.6);COLD-RESPONSIVE 6.6 (COR6.6)	-1.11304	7.40882	36.0019	1.97121e-09
AT1G24360	AT1G24360.1	Dual mitochondrial and plastid localized b-ketoacyl- ACP reductase, a component of the fatty acid synthase complex.	protein_coding	(KR)	(KR)	-0.377368	7.27945	16.7269	4.3165e-05
AT3G25860	AT3G25860.1	Encodes the dihydrolipoamide S-acetyltransferase subunit of the plastid Pyruvate Dehydrogenase Complex (E2). Mutant has embryo defect.	protein_coding	(LTA2)	PLASTID E2 SUBUNIT OF PYRUVATE DECARBOXYLASE (PLE2); (LTA2)	-0.297709	6.76148	9.25316	0.00235089
AT4G01883	AT4G01883.1	Polyketide cyclase / dehydrase and lipid transport protein;(source:Araport11)	protein_coding	(MLBP1)	(MLBP1)	-0.701476	1.89621	12.7541	0.000355232
AT1G78930	AT1G78930.1	Mitochondrial transcription termination factor family protein;(source:Araport11)	protein_coding	(MTERF16)	(MTERF16)	-0.704274	2.62017	11.1176	0.000855105
AT1G62110	AT1G62110.1	Mitochondrial transcription termination factor family protein;(source:Araport11)	protein_coding	(MTERF31)	(MTERF31)	-0.631655	2.73188	11.128	0.000850357
AT2G22770	AT2G22770.1	Regulates the development of ER bodies. also involves in response to the endophytic fungus Piriformospora indica.	protein_coding	(NAI1)	(NAI1)	-0.471493	6.67089	10.5292	0.00117505
AT5G04370	AT5G04370.2	A member of the Arabidopsis SABATH methyltransferase gene family. Encodes NAMT1, a methyltransferase that methylates nicotinic acid to yield methyl nicotinate.	protein_coding	(NAMT1)	(NAMT1)	-0.683577	3.30162	12.6403	0.000377514
AT2G28250	AT2G28250.1	Protein kinase superfamily protein;(source:Araport11)	protein_coding	(NCRK)	(NCRK)	-0.470137	6.23028	19.8863	8.21874e-06
AT4G09320	AT4G09320.1	nucleoside diphosphate kinase type 1 (NDPK1) gene, complete The mRNA is cell-to-cell mobile.	protein_coding	(NDPK1)	(NDPK1);NUCLEOSIDE DIPHOSPHATE KINASE 1 (NDK1); (ATNDK1)	-0.498576	8.24641	18.4775	1.71919e-05
AT4G26600	AT4G26600.1	S-adenosyl-L-methionine-dependent methyltransferases superfamily protein;(source:Araport11)	protein_coding	(NOP2B)	(NOP2B); (ATTRM4D);TRNA METHYLTRANSFERASE 4D (TRM4D)	-0.613414	4.40364	16.0396	6.20321e-05
AT1G11475	AT1G11475.1	Non-catalytic subunit common to nuclear DNA-dependent RNA polymerases II, IV and V; homologous to budding yeast RPB10.	protein_coding	(NRPB10)	(NRPE10); (NRPD10); (NRPB10)	-0.405675	4.67915	11.8379	0.000580363
AT5G41010	AT5G41010.1	Non-catalytic subunit common to nuclear DNA-dependent RNA polymerases II, IV and V; homologous to budding yeast RPB12.	protein_coding	(NRPB12)	(NRPD12); (NRPB12); (NRPE12)	-0.630922	4.6863	29.9715	4.38436e-08
AT3G22320	AT3G22320.1	Non-catalytic subunit common to DNA-dependent RNA polymerases I, II, III and IV; homologous to budding yeast RPB5.	protein_coding	(NRPB5)	(ATRPABC24.3); (NRPD5); (NRPB5);RNA POLYMERASE II FIFTH LARGEST SUBUNIT, A (RPB5A)	-0.316755	6.02348	10.0608	0.00151456
AT1G24310	AT1G24310.1	nuclear pore complex protein;(source:Araport11)	protein_coding	(NUP54)	(NUP54)	-0.505394	4.73247	22.0339	2.67877e-06
AT5G54580	AT5G54580.1	Encodes an RNA recognition motif (RRM) and is involved in C-> U RNA editing in mitochondria.	protein_coding	(ORRM2)	(ORRM2)	-0.517001	4.75028	29.3813	5.945e-08
AT2G34050	AT2G34050.1	Encodes an F-type ATP Synthase Assembly factor that binds to beta subunits of mATPase and cpATPases.	protein_coding	(P11)	(P11)	-0.564174	3.9	12.6935	0.000366928
AT5G40660	AT5G40660.1	Encodes an F-type ATP Synthase Assembly factor that binds to beta subunits of mitochondrial ATPase.	protein_coding	(P12)	(P12)	-0.298248	5.3341	10.0129	0.00155445
AT3G09700	AT3G09700.1	Chaperone DnaJ-domain superfamily protein;(source:Araport11)	protein_coding	(PAM18-2)	(PAM18-2)	-0.501463	3.51491	10.7207	0.00105945
AT3G27430	AT3G27430.2	Encodes 20S proteasome beta subunit PBB1 (PBB1).	protein_coding	(PBB1)	(PBB1)	-0.268579	6.85296	8.32829	0.00390323
AT5G38710	AT5G38710.1	Methylenetetrahydrofolate reductase family protein;(source:Araport11)	protein_coding	(PDH2)	(PDH2)	-0.729729	3.78897	10.0578	0.00151704
AT1G04330	AT1G04330.1	A proline/serine rich protein of unknown function. It interacts with defense related MAP kinase MPK6 and others. May be involved in signaling during defense or stress response.	protein_coding	(PH2)	(PH2)	-0.867992	2.58563	9.69987	0.00184281
AT3G27400	AT3G27400.1	Encodes a pectate lyase involved in response to nematodes.	protein_coding	(PLL18)	(PLL18)	-0.945692	4.08338	23.3973	1.31762e-06
AT4G24780	AT4G24780.1	Encodes a pectate lyase involved in response to nematodes.	protein_coding	(PLL19)	(PLL19)	-0.672129	8.57044	16.6914	4.39791e-05
AT2G46890	AT2G46890.1	3-oxo-5-alpha-steroid 4-dehydrogenase (DUF1295);(source:Araport11)	protein_coding	(PNET3)	(PNET3)	-0.429007	5.06786	8.52635	0.00350042
AT5G44578	AT5G44578.1	transmembrane protein;(source:Araport11)	protein_coding	(PROSCOOP9)	(PROSCOOP9)	-1.24878	0.501606	8.29424	0.00397711
AT3G55010	AT3G55010.1	encoding phosphoribosylformylglycinamidine cyclo-ligase (syn. AIR synthetase)that phosphorylates 5-phosphoribosyl-N-formylglycinamidine (FGAM) to form 5-aminoimidazole ribonucleotide (AIR)	protein_coding	(PUR5)	EMBRYO DEFECTIVE 2818 (EMB2818); (PUR5); (ATPURM)	-0.466484	5.48786	12.2757	0.000458901
AT2G44610	AT2G44610.1	Golgi-localized small GTPase, participates in the trafficking of CESA6 to the plasma membrane, maintaining Golgi organization and morphology, possible role in exocytosis. Plays and important role in hypocotyl growth by influencing cell elongation/growth and deposition of cellulose microfibrils in the cell wall. Plays an important role in cellulose synthesis. Influences both the distribution and v…	protein_coding	(RAB6A)	(RAB6); (RAB6A); (ATRAB6A); (ATRABH1B)	-0.271346	6.5784	9.38938	0.00218246
AT1G76440	AT1G76440.1	HSP20-like chaperones superfamily protein;(source:Araport11)	protein_coding	(RDS2)	(RDS2)	-0.406952	2.96387	8.47209	0.00360636
AT5G08050	AT5G08050.1	Encodes a grana core localized protein. Mutant plants have reduced NPQ, affected organization of light-havesting complex II and an enhanced grana stacking.	protein_coding	(RIQ1)	(RIQ1)	-0.49943	4.3475	8.41485	0.00372168
AT1G74730	AT1G74730.1	Encodes a grana core localized protein, is homologous to RIG1. Mutant plants have reduced NPQ, affected organization of light-havesting complex II and an enhanced grana stacking.	protein_coding	(RIQ2)	(RIQ2)	-0.640756	3.3057	13.553	0.000231923
AT5G14070	AT5G14070.1	Encodes a member of the CC-type glutaredoxin (ROXY) family that has been shown to interact with the transcription factor TGA2 and suppress ORA59 promoter activity. ROXY2, together with ROXY1 (AT3G02000), controls anther development. roxy1 roxy2 double mutants are sterile and do not produce pollen.	protein_coding	(ROXY2)	(ROXY2)	-0.796434	3.72383	29.6039	5.29987e-08
AT5G61000	AT5G61000.1	Replication factor-A protein 1-like protein;(source:Araport11)	protein_coding	(RPA70D)	(RPA70D);REPLICATION PROTEIN A 1D (RPA1D); (ATRPA70D)	-0.622189	3.88807	8.06958	0.00450146
AT1G29965	AT1G29965.1	cytosolic ribosomal protein gene, part of eL20 family	protein_coding	(RPL18AD)	(RPL18AD)	-1.10413	4.22815	34.2301	4.89661e-09
AT1G77940	AT1G77940.1	Ribosomal protein L7Ae/L30e/S12e/Gadd45 family protein;(source:Araport11)	protein_coding	(RPL30B)	(RPL30B)	-0.33008	7.81211	11.5204	0.000688355
AT3G18740	AT3G18740.1	The gene encodes a putative leucine-rich repeat (LRR)Receptor-like kinase (RLK).	protein_coding	(RPL30C)	(RPL30C);RECEPTOR-LIKE KINASE 902 (RLK902)	-0.312964	7.65291	9.08502	0.00257711
AT1G80750	AT1G80750.1	Cytosolic ribosomal 60S subunit protein.	protein_coding	(RPL7A)	(RPL7A)	-0.355921	5.91485	8.40026	0.00375168
AT2G01250	AT2G01250.1	Cytosolic ribosomal 60S subunit protein.	protein_coding	(RPL7B)	(RPL7B)	-0.323764	8.59517	10.2734	0.00134958
AT1G23410	AT1G23410.1	cytosolic ribosomal protein gene, part of eS31 family	protein_coding	(RPS27AA)	(RPS27AA)	-1.00296	4.10642	26.5763	2.53334e-07
AT2G19750	AT2G19750.1	Ribosomal protein S30 family protein;(source:Araport11)	protein_coding	(RPS30A)	(RPS30A)	-0.405228	6.23146	21.1995	4.13882e-06
AT4G29390	AT4G29390.1	Ribosomal protein S30 family protein;(source:Araport11)	protein_coding	(RPS30B)	(RPS30B)	-0.29885	6.82088	8.74863	0.00309835
AT5G56670	AT5G56670.1	Ribosomal protein S30 family protein;(source:Araport11)	protein_coding	(RPS30C)	(RPS30C)	-0.599655	7.52155	26.727	2.34326e-07
AT4G08685	AT4G08685.1	Encodes a protein, expressed in leaves, with similarity to pollen allergens. The mRNA is cell-to-cell mobile.	protein_coding	(SAH7)	(SAH7)	-0.364176	4.65546	8.64448	0.00328054
AT5G63980	AT5G63980.1	Encodes a bifunctional protein that has 3'(2'),5'-bisphosphate nucleotidase and inositol polyphosphate 1-phosphatase activities and rescues sulfur assimilation mutants in yeast. It is involved in the response to cold, drought (negative regulator of drought tolerance), and ABA. Mutants in this gene exhibit enhanced induction of stress genes in response to cold, ABA, salt and dehydration and increa…	protein_coding	(SAL1)	(SAL1);ALTERED EXPRESSION OF APX2 8 (ALX8); (ATSAL1); (ATFRY1);FIERY1 (FRY1);ROTUNDA 1 (RON1);SUPPRESSORS OF PIN1 OVEREXPRESSION 1 (SUPO1);HIGH EXPRESSION OF OSMOTICALLY RESPONSIVE GENES 2 (HOS2)	-0.71065	5.71415	11.2831	0.00078215
AT1G01900	AT1G01900.1	Encodes AtSBT1.1, a subtilisin-like serine protease. Cleaves the phytosulfokine AtPSK4, a growth promoting peptide.	protein_coding	(SBTI1.1)	(SBTI1.1); (ATSBT1.1)	-0.788559	3.03684	18.9478	1.34347e-05
AT1G29310	AT1G29310.1	SecY protein transport family protein;(source:Araport11)	protein_coding	(Sec. 61-alpha1)	(Sec. 61-alpha1)	-0.364504	5.78342	11.7056	0.000623121
AT3G23325	AT3G23325.1	Splicing factor 3B subunit 5/RDS3 complex subunit 10;(source:Araport11)	protein_coding	(SF3B5A)	(SF3B5A)	-0.424716	3.262	8.5089	0.00353414
AT3G07590	AT3G07590.1	SmD1a is one of two Yeast SmD1 orthologs, lower levels than SmD1b.It is localized to the nucleus and may play a minor role in RNA splicing and indirectly facilitating PTGS.	protein_coding	(SMD1A)	(SMD1A)	-0.430333	4.11035	9.73728	0.00180568
AT2G28870	AT2G28870.1	cyclin-dependent kinase inhibitor SMR1-like protein;(source:Araport11)	protein_coding	(SMR10)	(SMR10)	-0.713647	1.80642	8.11697	0.00438527
AT5G43990	AT5G43990.2	Encodes SUVR2, one of the four closely related Arabidopsis SUVR proteins that belong to the SU(VAR)3-9 subgroup of SET-domain proteins. Proteins containing the evolutionarily conserved SET domain are involved in regulation of eukaryotic gene expression and chromatin structure through their histone lysine methyltransferase (HMTase) activity. SUVR1, SUVR2 and SUVR4 proteins contain a novel domain a…	protein_coding	(SUVR2)	(SUVR2);SET DOMAIN PROTEIN 18 (SDG18)	-0.413389	3.43232	9.24734	0.00235837
AT4G34290	AT4G34290.1	SWIB/MDM2 domain superfamily protein;(source:Araport11)	protein_coding	(SWIB3)	(SWIB3)	-0.603169	3.29299	10.0594	0.0015157
AT2G35605	AT2G35605.1	SWIB/MDM2 domain superfamily protein;(source:Araport11)	protein_coding	(SWIB6)	(SWIB6)	-0.454815	4.63328	14.9635	0.00010961
AT1G55900	AT1G55900.1	component of a translocase in the mitochondrial inner membrane	protein_coding	(TIM50)	EMBRYO DEFECTIVE 1860 (emb1860); (TIM50)	-0.673058	4.90487	24.7577	6.50083e-07
AT5G25100	AT5G25100.2	Endomembrane protein 70 protein family;(source:Araport11)	protein_coding	(TMN9)	(TMN9)	-0.327393	7.57569	9.10966	0.00254263
AT5G58030	AT5G58030.1	Part of multi-protein complex, acting as guanine nucleotide exchange factors (GEFs) and possibly as tethers, regulating intracellular trafficking.	protein_coding	(TRAPPC5)	(TRAPPC5)	-0.288286	5.37631	8.6551	0.00326147
AT4G40000	AT4G40000.1	S-adenosyl-L-methionine-dependent methyltransferases superfamily protein;(source:Araport11)	protein_coding	(TRM4A)	(ATTRM4A); (TRM4A)	-0.596058	3.07303	14.5134	0.000139163
AT1G65650	AT1G65650.1	Peptidase C12, ubiquitin carboxyl-terminal hydrolase 1;(source:Araport11)	protein_coding	(UCH2)	(UCH2)	-0.325648	5.19561	9.79234	0.0017524
AT4G27560	AT4G27560.1	Encodes a UDP-glycosyltransferase that contributes to cold, salt and drought stress tolerance via modulating anthocyanin accumulation.	protein_coding	(UGT79B2)	(UGT79B2)	-1.20985	5.50422	25.6409	4.11237e-07
AT4G15480	AT4G15480.1	Encodes a protein that might have sinapic acid:UDP-glucose glucosyltransferase activity.	protein_coding	(UGT84A1)	(UGT84A1)	-1.09918	3.51146	12.7146	0.000362814
AT1G06000	AT1G06000.1	encodes a flavonol-7-O-rhamnosyltransferase involved in the formation of rhamnosylated flavonols	protein_coding	(UGT89C1)	(UGT89C1)	-0.566981	6.71736	8.12411	0.00436804
AT5G04160	AT5G04160.1	UUAT1 is a UDP-Uronic acid transporter that is localized to the Golgi. It is expressed in the seed coat epidermis and is involved in the development of seed coat mucilage.	protein_coding	(UUAT1)	(UUAT1)	-0.541914	4.19208	11.4606	0.000710869
AT4G02620	AT4G02620.1	Member of V-ATPase family. Vacuolar-type H + -ATPase (V-ATPase) is a multisubunit proton pump located on the endomembranes.	protein_coding	(VHA-F)	(VHA-F)	-0.355393	6.72963	9.62064	0.00192402
AT3G02870	AT3G02870.1	Encodes a L-galactose-1-phosphate phosphatase, involved in ascorbate biosynthesis.	protein_coding	(VTC4)	L-GALACTOSE 1-PHOSPHATE PHOSPHATASE (GPP); (VTC4)	-0.600463	4.49257	24.9976	5.74008e-07
AT4G01250	AT4G01250.1	AtWRKY22 is a member of WRKY Transcription Factor; Group II-e. It is involved in regulation of dark induced leaf senescence.	protein_coding	(WRKY22)	(AtWRKY22); (WRKY22)	-0.998216	3.63591	28.7427	8.26594e-08
AT1G51510	AT1G51510.1	This gene is predicted to encode a protein involved in the exon junction complex. Though there is a predicted RNA binding motif, in the Drosophila ortholog (33% identity), this motif mediates interactions with Mago and is not available for RNA binding. The Arabidopsis Y14 protein appears to be predominantly nucleolar, but there is also some evidence for its presence in the cytoplasm.	protein_coding	(Y14)	(Y14)	-0.282521	6.47342	7.80558	0.00520852
AT2G38860	AT2G38860.2	Encodes protease I (pfpI)-like protein YLS5.	protein_coding	(YLS5)	(YLS5); (DJ-1E); (DJ1E)	-0.831153	6.40993	19.4815	1.01576e-05
AT5G48880	AT5G48880.2	Encodes a peroxisomal 3-keto-acyl-CoA thiolase 2 precursor. EC2.3.1.16 thiolases. AT5G48880.1 is named PKT1 and AT5G48880.2 is named PKT2.	protein_coding	3-KETO-ACYL-COENZYME A THIOLASE 5 (KAT5)	3-KETO-ACYL-COENZYME A THIOLASE 5 (KAT5);PEROXISOMAL 3-KETO-ACYL-COA THIOLASE 2 (PKT2)	-1.38385	6.37551	41.6782	1.07604e-10
AT1G72370	AT1G72370.1	acidic protein associated to 40S ribosomal subunit of ribosomes. Involved in polysome formation during active protein synthesis. Expressed in actively growing tissue.	protein_coding	40S RIBOSOMAL PROTEIN SA (P40)	(RP40); (RPSAA);40S RIBOSOMAL PROTEIN SA (P40); (AP40)	-0.377629	9.3891	10.648	0.00110189
AT3G04770	AT3G04770.1	40s ribosomal protein SA B;(source:Araport11)	protein_coding	40S RIBOSOMAL PROTEIN SA B (RPSAb)	40S RIBOSOMAL PROTEIN SA B (RPSAb)	-0.843465	4.10492	27.0232	2.01029e-07
AT1G65060	AT1G65060.1	encodes an isoform of 4-coumarate:CoA ligase (4CL), which is involved in the last step of the general phenylpropanoid pathway. mRNA levels are not induced in response to wounding or to fungal infection by P. parasitica. mRNA is expressed in flowers, to a lesser degree in mature leaves and siliques and marginally in seedling roots and bolting stems of mature plants. The catalytic efficiency was in…	protein_coding	4-COUMARATE:COA LIGASE 3 (4CL3)	4-COUMARATE:COA LIGASE 3 (4CL3)	-1.6952	4.73657	37.58	8.77383e-10
AT1G01100	AT1G01100.1	Co-orthologous gene of large ribosomal subunit protein RPP1.	protein_coding	60S ACIDIC RIBOSOMAL PROTEIN P1-1 (RPP1A)	RPP1 CO-ORTHOLOGOUS GENE 1 (RPP1.1);60S ACIDIC RIBOSOMAL PROTEIN P1-1 (RPP1A)	-0.362869	8.47606	8.97343	0.00273934
AT4G00810	AT4G00810.1	Co-orthologous gene of large ribosomal subunit protein RPP1.	protein_coding	60S ACIDIC RIBOSOMAL PROTEIN P1-2 (RPP1B)	RPP1 CO-ORTHOLOGOUS GENE 2 (RPP1.2);60S ACIDIC RIBOSOMAL PROTEIN P1-2 (RPP1B)	-0.486557	7.23181	21.8347	2.97176e-06
AT5G47700	AT5G47700.1	Co-orthologous gene of large ribosomal subunit protein RPP1.	protein_coding	60S ACIDIC RIBOSOMAL PROTEIN P1-3 (RPP1C)	RPP1 CO-ORTHOLOGOUS GENE 3 (RPP1.3);60S ACIDIC RIBOSOMAL PROTEIN P1-3 (RPP1C)	-0.427952	8.70417	9.39368	0.00217735
AT4G02970	AT4G02970.1	Signal recognition particle. Type 4 of RNA polymerase III dependent genes.	protein_coding	7SL RNA1 (AT7SL-1)	7SL RNA1 (AT7SL-1)	-0.634871	5.26639	12.8601	0.000335669
AT5G04895	AT5G04895.1	DEA(D/H)-box RNA helicase family protein;(source:Araport11)	protein_coding	ABA OVERLY SENSITIVE 6 (ABO6)	ABA OVERLY SENSITIVE 6 (ABO6)	-0.550382	4.08123	10.0824	0.00149691
AT4G33680	AT4G33680.1	Encodes an L,L-diaminopimelate aminotransferase. Involved in disease resistance against Pseudomonas syringae. mutants have elevated SA levels, a low level of spontaneous cell death, callose deposition, and enlarged cells in leaves. genetically maps on chr 4 between L23H3 and nga1139.	protein_coding	ABERRANT GROWTH AND DEATH 2 (AGD2)	ABERRANT GROWTH AND DEATH 2 (AGD2);ARF-GAP DOMAIN 2 (AGD2)	-0.37956	6.16911	9.53056	0.00202078
AT4G29140	AT4G29140.1	Encodes Activated Disease Susceptibility 1 (ADS1), a putative MATE (multidrug and toxic compound extrusion) transport protein that negatively regulates plant disease resistance.	protein_coding	ACTIVATED DISEASE SUSCEPTIBILITY 1 (ADS1)	ARABIDOPSIS ABNORMAL SHOOT3 (ABS3);ACTIVATED DISEASE SUSCEPTIBILITY 1 (ADS1);ALTERED DEVELOPMENT PROGRAM 1 (ADP1)	-0.958141	4.99972	28.335	1.02032e-07
AT1G54580	AT1G54580.1	encodes an acyl carrier protein expressed in leaves, roots, and dry seeds. Gene expression is not regulated by light but downregulated by starvation and upregulated by increased level of exogenous sucrose. The mRNA is cell-to-cell mobile.	protein_coding	ACYL CARRIER PROTEIN 2 (ACP2)	(ATACP2);ACYL CARRIER PROTEIN 2 (ACP2)	-0.39069	7.77795	10.6218	0.00111763
AT1G54630	AT1G54630.1	encodes an acyl carrier protein expressed in leaves, roots, and dry seeds. Gene expression is not regulated by light.	protein_coding	ACYL CARRIER PROTEIN 3 (ACP3)	(ATACP3);ACYL CARRIER PROTEIN 3 (ACP3)	-0.494245	6.13156	19.4294	1.04389e-05
AT3G02630	AT3G02630.1	One of seven acyl acyl carrier proteins. Expressed primarily in developing seeds.Involved in fatty acid metabolism. Redundant &#916;9 stearoyl-ACP desaturase gene which together with FAB2 and AAD1 during embryo development provide precursors for the elaboration of embryo cuticle and therefore plays a specific role during the phase of invasive embryo growth through the endosperm. Together with FAB…	protein_coding	ACYL?ACYL CARRIER PROTEIN (ACP) DESATURASE 5 (AAD5)	ACYL?ACYL CARRIER PROTEIN (ACP) DESATURASE 5 (AAD5)	-0.3706	6.39937	10.4227	0.00124479
AT1G55320	AT1G55320.1	Encodes a protein with similarity to acyl activating enzymes. AAE18 is localized to the peroxisome where it may be involved in metabolism of auxin precursors to active auxins.	protein_coding	ACYL-ACTIVATING ENZYME 18 (AAE18)	ACYL-ACTIVATING ENZYME 18 (AAE18)	-0.623075	5.49685	13.3543	0.000257837
AT4G22570	AT4G22570.1	Encodes an adenine phosphoribosyltransferase (APT; EC 2.4.2.7), which is a constitutively expressed enzyme involved in the one-step salvage of adenine to AMP. APT3 has higher affinity for zeatin, isopentenyladenine and benzyladenine than APT1 but lower Vmax than APT1.	protein_coding	ADENINE PHOSPHORIBOSYL TRANSFERASE 3 (APT3)	ADENINE PHOSPHORIBOSYL TRANSFERASE 3 (APT3)	-0.430571	5.01923	8.66937	0.00323602
AT3G09820	AT3G09820.1	Involved in the salvage synthesis of adenylates and methyl recycling	protein_coding	ADENOSINE KINASE 1 (ADK1)	(ATADK1);ADENOSINE KINASE 1 (ADK1)	-0.440148	8.60893	19.5385	9.85947e-06
AT5G03300	AT5G03300.1	Encodes adenosine kinase 2 (ADK2), a typical, constitutively expressed housekeeping enzyme. Shows a high sequence identity with ADK1. Involved in salvage synthesis of adenylates and methyl recycling. Enzyme activity is substantially inhibited in roots, siliques and dry seeds by an unknown compound. May contribute to cytokinin interconversion. The mRNA is cell-to-cell mobile.	protein_coding	ADENOSINE KINASE 2 (ADK2)	ADENOSINE KINASE 2 (ADK2)	-0.552013	7.39778	22.3428	2.28069e-06
AT1G23490	AT1G23490.1	Gene encoding ADP-ribosylation factor and similar to other ARFs and ARF-like proteins. A member of ARF GTPase family. Arabidopsis has 21 known members, known to be essential for vesicle coating and uncoating and functions in GTP-binding. The gene is shown to play a role in cell division, cell expansion and cellulose production using antisense construct.	protein_coding	ADP-RIBOSYLATION FACTOR 1 (ARF1)	ADP-RIBOSYLATION FACTOR 1A (ATARFA1A);ADP-RIBOSYLATION FACTOR 1 (ARF1);ADP-RIBOSYLATION FACTOR (ATARF);ADP-RIBOSYLATION FACTOR 1 (ATARF1)	-0.320536	7.54489	14.4823	0.000141486
AT1G10630	AT1G10630.1	A member of ARF GTPase family. A thaliana has 21 members of this family, known to be essential for vesicle coating and uncoating and functions in GTP-binding. Gene encoding ADP-ribosylation factor and similar to other ARFs and ARF-like proteins. The gene is shown to play a role in cell division, cell expansion and cellulose production using antisense construct.	protein_coding	ADP-RIBOSYLATION FACTOR A1F (ARFA1F)	ADP-RIBOSYLATION FACTOR A1F (ARFA1F);ADP-RIBOSYLATION FACTOR A1F (ATARFA1F)	-0.273272	6.88766	9.79307	0.0017517
AT3G49860	AT3G49860.1	A member of ARF-like GTPase family. A thaliana has 21 members, in two subfamilies, ARF and ARF-like (ARL) GTPases. Possible pseudogene because it lacks an N-terminal part that is conserved among the other ARL8 proteins.	protein_coding	ADP-RIBOSYLATION FACTOR-LIKE A1B (ARLA1B)	ADP-RIBOSYLATION FACTOR-LIKE A1B (ATARLA1B);ADP-RIBOSYLATION FACTOR-LIKE 8D (ARL8D);ADP-RIBOSYLATION FACTOR-LIKE A1B (ARLA1B)	-0.530279	4.25483	13.6114	0.00022482
AT4G37750	AT4G37750.1	ANT is required for control of cell proliferation and encodes a putative transcriptional regulator similar to AP2. Loss of function alleles have reduced fertility, abnormal ovules and abnormal lateral organs. Expressed in the chalaza, floral organ primordia, and lateral shoot organ primordia. Regulates growth and cell numbers during organogenesis. Modulates auxin biosynthesis in the ovule via reg…	protein_coding	AINTEGUMENTA (ANT)	AINTEGUMENTA (ANT);DRAGON (DRG); (CKC); (ATANT);COMPLEMENTING A PROTEIN KINASE C MUTANT 1 (CKC1)	-1.02847	4.46901	42.4208	7.36017e-11
AT4G39660	AT4G39660.1	alanine:glyoxylate aminotransferase 2 homolog (AGT2). The mRNA is cell-to-cell mobile.	protein_coding	ALANINE:GLYOXYLATE AMINOTRANSFERASE 2 (AGT2)	ALANINE:GLYOXYLATE AMINOTRANSFERASE 2 (AGT2)	-0.430207	7.26564	13.1351	0.000289808
AT3G63410	AT3G63410.1	Encodes a MPBQ/MSBQ methyltransferase located in the chloroplast inner envelope membrane. Mutant plants lack plastoquinone (PQ), suggesting that the APG1 protein is involved in the methylation step of PQ biosynthesis. The gene product is also involved in tocopherol (vitamin E) biosynthesis.	protein_coding	ALBINO OR PALE GREEN MUTANT 1 (APG1)	(E37);VITAMIN E DEFECTIVE 3 (VTE3);INNER ENVELOPE PROTEIN 37 (IEP37);ALBINO OR PALE GREEN MUTANT 1 (APG1)	-0.312623	6.15799	9.71839	0.00182433
AT3G53880	AT3G53880.1	NAD(P)-linked oxidoreductase superfamily protein;(source:Araport11)	protein_coding	ALDO-KETO REDUCTASE FAMILY 4 MEMBER C11 (AKR4C11)	ALDO-KETO REDUCTASE FAMILY 4 MEMBER C11 (AKR4C11)	-0.392188	4.51818	9.5848	0.00196195
AT5G08370	AT5G08370.1	Member of Glycoside Hydrolase Family 27 (GH27)that functions as an &#945;-galactosidase.	protein_coding	ALPHA-GALACTOSIDASE 2 (AGAL2)	ALPHA-GALACTOSIDASE 2 (AtAGAL2);ALPHA-GALACTOSIDASE 2 (AGAL2)	-0.430904	4.00694	8.31479	0.00393236
AT5G63850	AT5G63850.1	Amino acid transporter whose expression is downregulated by dehydration.	protein_coding	AMINO ACID PERMEASE 4 (AAP4)	AMINO ACID PERMEASE 4 (AAP4)	-1.03108	6.37596	31.6951	1.80379e-08
AT3G24300	AT3G24300.1	Encodes a plasma membrane localized ammonium transporter.	protein_coding	AMMONIUM TRANSPORTER 1;3 (AMT1;3)	AMMONIUM TRANSPORTER 1;3 (AMT1;3);AMMONIUM TRANSPORTER 1;3 (ATAMT1;3)	-0.367615	7.4459	11.8745	0.000569085
AT2G18290	AT2G18290.1	Encodes APC10 (anaphase promoting complex 10). Overexpression of APC10 likely mimics auxin and ethylene sensitive phenotypes. Plays an essential role in cell proliferation during leaf development.	protein_coding	ANAPHASE PROMOTING COMPLEX 10 (APC10)	ANAPHASE PROMOTING COMPLEX 10 (APC10);EMBRYO DEFECTIVE 2783 (EMB2783); (ATAPC10)	-0.550099	3.59349	12.1613	0.000487924
AT1G28530	AT1G28530.1	Encodes a protein that localizes to both chloroplasts and amyloplasts and is required for both chloroplast and mesophyll development.	protein_coding	ANGULATA 10 (ANU10)	ANGULATA 10 (ANU10)	-0.547996	2.59951	11.3295	0.000762848
AT1G35720	AT1G35720.1	Encodes a member of the annexin gene family, a diverse, multigene family of calcium-dependent, membrane-binding proteins. The protein was determined to have peroxidase activity. This activity is thought to be dependent on the presence of post-translational modifications (most likely phosphorylation). The protein was shown to be present as a mixture of monomer and homodimer. The homodimerization s…	protein_coding	ANNEXIN 1 (ANNAT1)	ANNEXIN 1 (ANNAT1); (OXY5); (ATANN1);ANNEXIN 1 (ANN1); (ATOXY5)	-0.430293	9.68021	11.8229	0.000585073
AT1G25220	AT1G25220.2	Catalyzes the first step of tryptophan biosynthesis: Chorismate L-Glutamine = Anthranilate Pyruvate L-Glutamate. Functions as a heterocomplex with anthranilate synthase alpha subunit (ASA1 or ASA2).	protein_coding	ANTHRANILATE SYNTHASE BETA SUBUNIT 1 (ASB1)	ANTHRANILATE SYNTHASE BETA SUBUNIT 1 (ASB1)	-0.716499	5.11316	18.9378	1.35049e-05
AT2G14750	AT2G14750.1	Encodes adenosine-5'-phosphosulfate kinase. Provides activated sulfate for sulfation of secondary metabolites, including the glucosinolates. Essential for pollen viability. The mRNA is cell-to-cell mobile.	protein_coding	APS KINASE (APK)	APS KINASE (APK);ADENOSINE-5'-PHOSPHOSULFATE (APS) KINASE 1 (APK1); (ATAKN1);APS KINASE 1 (AKN1)	-0.790147	6.43984	9.64876	0.0018948
AT4G39940	AT4G39940.1	adenosine-5'-phosphosulfate-kinase (akn2) mRNA, complete The mRNA is cell-to-cell mobile.	protein_coding	APS-KINASE 2 (AKN2)	APS-KINASE 2 (AKN2);ADENOSINE-5'-PHOSPHOSULFATE (APS) KINASE 2 (APK2)	-1.27428	6.64579	11.5471	0.000678538
AT3G23620	AT3G23620.1	BRIX domain containing protein, similar to RNA biogenesis factors in yeast. Binds rRNA and likely also functions in RNA biogenesis in Arabidopsis. Essential gene, mutants are embryo lethal and does not transmit well through the gametophyte.	protein_coding	ARABIDOPSIS HOMOLOG OF YEAST RPF2 (ARPF2)	ARABIDOPSIS HOMOLOG OF YEAST RPF2 (ARPF2)	-0.626863	5.73138	26.9419	2.0966e-07
AT2G37990	AT2G37990.1	ribosome biogenesis regulatory protein (RRS1) family protein;(source:Araport11)	protein_coding	ARABIDOPSIS HOMOLOG OF YEAST RRS1 (ARRS1)	ARABIDOPSIS HOMOLOG OF YEAST RRS1 (ARRS1)	-0.516955	5.94116	18.0121	2.19506e-05
AT3G15460	AT3G15460.1	Encodes one of two Arabidopsis orthologs of yeast BRX1, a protein involved in maturation of the large ribosomal subunit. The proteins are mainly localized in nucleolus. Mutant plants are affected in pre-rRNA processing.	protein_coding	ARABIDOPSIS HOMOLOGUE OF YEAST BRX1 1 (ATBRX1-1)	ARABIDOPSIS HOMOLOGUE OF YEAST BRX1 1 (ATBRX1-1)	-0.696001	3.77095	9.61716	0.00192767
AT1G52930	AT1G52930.1	Encodes one of two Arabidopsis orthologs of yeast BRX1, a protein involved in maturation of the large ribosomal subunit. The proteins are mainly localized in nucleolus. Mutant plants are affected in pre-rRNA processing.	protein_coding	ARABIDOPSIS HOMOLOGUE OF YEAST BRX1 2 (ATBRX1-2)	ARABIDOPSIS HOMOLOGUE OF YEAST BRX1 2 (ATBRX1-2)	-0.496069	5.64505	11.5526	0.00067656
AT4G38140	AT4G38140.1	RING/U-box superfamily protein;(source:Araport11)	protein_coding	ARABIDOPSIS T??XICOS EN LEVADURA 100 (ATL100)	ARABIDOPSIS T??XICOS EN LEVADURA 100 (ATL100)	-1.53276	-1.07832	7.96136	0.00477864
AT2G46495	AT2G46495.1	RING/U-box superfamily protein;(source:Araport11)	protein_coding	ARABIDOPSIS T??XICOS EN LEVADURA 21 (ATL21)	ARABIDOPSIS T??XICOS EN LEVADURA 21 (ATL21)	-0.75186	3.01576	10.3482	0.00129603
AT1G34350	AT1G34350.2	Encodes a putative transmembrane protein that has been localized around the nucleus and is involved in pollen germination and pollen tube growth.	protein_coding	ARABIDOPSIS TRANSMEMBRANE PROTEIN 18 (TMEM18)	ARABIDOPSIS TRANSMEMBRANE PROTEIN 18 (TMEM18)	-0.400664	3.92041	8.57073	0.00341609
AT1G69440	AT1G69440.1	Encodes ARGONAUTE7, a member of the ARGONAUTE family, characterised by the presence of PAZ and PIWI domains. Involved in the regulation of developmental timing. Required for the accumulation of TAS3 ta-siRNAs but not for accumulation of miR171, miR173, miR390 or mi391. Localized in mature rosette leaves and floral buds.	protein_coding	ARGONAUTE7 (AGO7)	ARGONAUTE7 (AGO7);ZIPPY (ZIP)	-0.529381	3.47025	13.4642	0.000243163
AT5G10240	AT5G10240.1	Encodes asparagine synthetase (ASN3).	protein_coding	ASPARAGINE SYNTHETASE 3 (ASN3)	ASPARAGINE SYNTHETASE 3 (ASN3)	-0.359375	5.59209	10.1113	0.00147365
AT2G30970	AT2G30970.1	ASPARTATE AMINOTRANSFERASE 1	protein_coding	ASPARTATE AMINOTRANSFERASE 1 (ASP1)	ASPARTATE AMINOTRANSFERASE 1 (ASP1)	-0.413899	6.95055	15.4916	8.28708e-05
AT4G31990	AT4G31990.3	Encodes a plastid-localized aspartate aminotransferase. Does not display any PAT (glutamate/aspartate-prephenate aminotransferase) activity even in the presence of a high concentration of prephenate.	protein_coding	ASPARTATE AMINOTRANSFERASE 5 (ASP5)	ASPARTATE AMINOTRANSFERASE 5 (ASP5); (ATAAT1);ASPARTATE AMINOTRANSFERASE DEFICIENT 3 (AAT3)	-0.340022	7.51745	13.3257	0.000261794
AT1G16530	AT1G16530.1	ASYMMETRIC LEAVES 2-like 9;(source:Araport11)	protein_coding	ASYMMETRIC LEAVES 2-LIKE 9 (ASL9)	ASYMMETRIC LEAVES 2-LIKE 9 (ASL9);LOB DOMAIN-CONTAINING PROTEIN 3 (LBD3)	-0.759682	3.84299	23.9928	9.66962e-07
AT3G60870	AT3G60870.1	Encodes an AT hook domain containing protein that, when overexpressed, delays flowering. Los s of function mutations have defects in primary and lateral root development.	protein_coding	AT-HOOK MOTIF CONTAINING NUCLEAR LOCALIZED PROTEIN 18 (AHL18)	AT-HOOK MOTIF CONTAINING NUCLEAR LOCALIZED PROTEIN 18 (AHL18)	-0.811139	1.37664	10.1831	0.00141735
AT3G22890	AT3G22890.1	encodes ATP sulfurylase, the first enzyme in the sulfate assimilation pathway of Arabidopsis. It may also participate in selenium metabolism. The mRNA is cell-to-cell mobile.	protein_coding	ATP SULFURYLASE 1 (APS1)	(ATPS1);ATP SULFURYLASE 1 (APS1)	-0.546366	8.40249	17.6929	2.59589e-05
AT4G09650	AT4G09650.1	Encodes the chloroplast ATPase delta-subunit. The mRNA is cell-to-cell mobile.	protein_coding	ATP SYNTHASE DELTA-SUBUNIT GENE (ATPD)	PIGMENT DEFECTIVE 332 (PDE332);ATP SYNTHASE DELTA-SUBUNIT GENE (ATPD)	-0.394759	4.36078	8.98854	0.00271678
AT1G19800	AT1G19800.2	Encodes a permease-like protein involved in lipid transfer from the ER to the chloroplast, more specifically, transfer of phosphatidate across the chloroplast inner membrane. Mutant leaves accumulate trigalactosyldiacylglycerol, triacylglycerol and phosphatidate. Chloroplast lipids are altered in their fatty acid composition and as a consequence the development of chloroplasts in the mutants are …	protein_coding	ATP-BINDING CASSETTE I14 (ABCI14)	ATP-BINDING CASSETTE I14 (ABCI14);TRIGALACTOSYLDIACYLGLYCEROL 1 (TGD1)	-0.296897	4.28102	7.97029	0.00475513
AT1G10670	AT1G10670.3	One of the three genes encoding subunit A of the trimeric protein ATP Citrate Lyase. Antisense ACLA-1 plants cause a reduction in cytosolic acetyl-CoA metabolism and have upregulation of stress-related genes and down-regulation of primary metabolism and growth genes, suggesting the mutation restricts normal growth and developmental processes and puts the plant into a state of stress.	protein_coding	ATP-CITRATE LYASE A-1 (ACLA-1)	ATP-CITRATE LYASE A-1 (ACLA-1)	-0.261423	7.98573	8.99195	0.00271172
AT3G06650	AT3G06650.1	One of the two genes encoding subunit B of the trimeric enzyme ATP Citrate lyase	protein_coding	ATP-CITRATE LYASE B-1 (ACLB-1)	ATP-CITRATE LYASE B-1 (ACLB-1)	-0.443316	7.24068	12.3139	0.000449599
AT5G61440	AT5G61440.1	Encodes a member of the thioredoxin family protein. Located in the chloroplast. The mRNA is cell-to-cell mobile.	protein_coding	ATYPICAL CYS HIS RICH THIOREDOXIN 5 (ACHT5)	ATYPICAL CYS HIS RICH THIOREDOXIN 5 (ACHT5)	-0.609197	4.97177	16.8703	4.00228e-05
AT2G38120	AT2G38120.1	Encodes an auxin influx transporter. AUX1 resides at the apical plasma membrane of protophloem cells and at highly dynamic subpopulations of Golgi apparatus and endosomes in all cell types. AUX1 action in the lateral root cap and/or epidermal cells influences lateral root initiation and positioning. Shoot supplied ammonium targets AUX1 and inhibits lateral root emergence. The mRNA is cell-to-cell…	protein_coding	AUXIN RESISTANT 1 (AUX1)	AUXIN RESISTANT 1 (AUX1);WAVY ROOTS 5 (WAV5); (ATAUX1);MODIFIER OF ARF7/NPH4 PHENOTYPES 1 (MAP1); (PIR1)	-0.327538	7.51568	9.68859	0.00185416
AT3G61830	AT3G61830.1	auxin response factor 18;(source:Araport11)	protein_coding	AUXIN RESPONSE FACTOR 18 (ARF18)	AUXIN RESPONSE FACTOR 18 (ARF18)	-0.622422	3.70636	11.7834	0.000597619
AT5G60450	AT5G60450.1	Encodes a member of the ARF family of transcription factors which mediate auxin responses. ARF4 appears to have redundant function with ETT(ARF3) in specifying abaxial cell identity.	protein_coding	AUXIN RESPONSE FACTOR 4 (ARF4)	AUXIN RESPONSE FACTOR 4 (ARF4)	-0.358049	5.51699	8.19199	0.00420758
AT3G07390	AT3G07390.1	isolated from differential screening of a cDNA library from auxin-treated root culture. sequence does not show homology to any known proteins and is predicted to be extracellular. The mRNA is cell-to-cell mobile.	protein_coding	AUXIN-INDUCED IN ROOT CULTURES 12 (AIR12)	AUXIN-INDUCED IN ROOT CULTURES 12 (AIR12)	-0.550571	5.72865	22.1486	2.52338e-06
AT4G20270	AT4G20270.1	Encodes a CLAVATA1-related receptor kinase-like protein required for both shoot and flower meristem function. It has a broad expression pattern and is involved in vascular strand development in the leaf, control of leaf shape, size and symmetry, male gametophyte development and ovule specification and function. The mRNA is cell-to-cell mobile.	protein_coding	BARELY ANY MERISTEM 3 (BAM3)	BARELY ANY MERISTEM 3 (BAM3)	-0.353272	6.52431	8.6104	0.00334248
AT1G17880	AT1G17880.1	basic transcription factor 3;(source:Araport11)	protein_coding	BASIC TRANSCRIPTION FACTOR 3 (BTF3)	(ATBTF3);BASIC TRANSCRIPTION FACTOR 3 (BTF3)	-0.270832	7.35967	8.49365	0.00356389
AT3G56130	AT3G56130.1	biotin/lipoyl attachment domain-containing protein;(source:Araport11)	protein_coding	BCCP-LIKE PROTEIN 3 (BLP3)	BIOTIN/LIPOYL ATTACHMENT DOMAIN CONTAINING 1 (BADC1);BCCP-LIKE PROTEIN 3 (BLP3)	-0.330371	6.71887	13.1383	0.000289316
AT1G60270	AT1G60270.1	beta glucosidase 6;(source:Araport11)	protein_coding	BETA GLUCOSIDASE 6 (BGLU6)	BETA GLUCOSIDASE 6 (BGLU6)	-0.710149	4.06635	12.2923	0.000454838
AT4G36360	AT4G36360.1	putative beta-galactosidase (BGAL3 gene)	protein_coding	BETA-GALACTOSIDASE 3 (BGAL3)	BETA-GALACTOSIDASE 3 (BGAL3)	-0.337913	7.35143	13.0379	0.000305247
AT5G39990	AT5G39990.1	Encodes GlcAT14A, a beta-glucuronosyltransferase involved in the biosynthesis of type II arabinogalactan. The protein was localized to the Golgi apparatus when transiently expressed in Nicotiana benthamiana. Plays a role in cell elongation during seedling growth.	protein_coding	BETA-GLUCURONOSYLTRANSFERASE 14A (GLCAT14A)	BETA-GLUCURONOSYLTRANSFERASE 14A (GLCAT14A)	-0.361226	5.24756	9.3222	0.00226394
AT2G26900	AT2G26900.1	Sodium Bile acid symporter family;(source:Araport11)	protein_coding	BILE ACID:SODIUM SYMPORTER FAMILY PROTEIN 2 (BASS2)	BILE ACID:SODIUM SYMPORTER FAMILY PROTEIN 2 (BASS2)	-0.328637	6.53469	10.3873	0.00126888
AT2G43360	AT2G43360.1	Catalyzes the conversion of dethiobiotin to biotin.	protein_coding	BIOTIN AUXOTROPH 2 (BIO2)	BIOTIN AUXOTROPH 2 (BIO2); (EMB49);BIOTIN AUXOTROPH B (BIOB)	-0.522863	5.62799	13.7075	0.000213597
AT4G36540	AT4G36540.1	Encodes the brassinosteroid signaling component BEE2 (BR-ENHANCED EXPRESSION 2). Positively modulates the shade avoidance syndrome in Arabidopsis seedlings.	protein_coding	BR ENHANCED EXPRESSION 2 (BEE2)	BR ENHANCED EXPRESSION 2 (BEE2)	-0.657503	2.36188	12.0412	0.000520369
AT3G49010	AT3G49010.1	Encodes 60S ribosomal protein L13. Homolog of human breast basic conserved 1 (BBC1).	protein_coding	BREAST BASIC CONSERVED 1 (BBC1)	40S RIBOSOMAL PROTEIN (RSU2);BREAST BASIC CONSERVED 1 (ATBBC1);BREAST BASIC CONSERVED 1 (BBC1)	-0.394135	8.74447	14.8314	0.000117559
AT1G04020	AT1G04020.1	Encodes a protein containing two tandem BRCA1 C-Terminal (BRCT) domains, which function in phosphorylation-dependent protein-protein interactions. Loss of function mutations cause defects in meristem organization due to failure to repress WUS. BARD1 binds to WUS promoter and over expression of BARD reduces the extent of WUS expression.	protein_coding	BREAST CANCER ASSOCIATED RING 1 (BARD1)	(ATBARD1);REPRESSOR OF WUSCHEL1 (ROW1);BREAST CANCER ASSOCIATED RING 1 (BARD1)	-0.725966	3.40631	17.949	2.26906e-05
AT5G20540	AT5G20540.1	Belongs to five-member BRX gene family. Arabidopsis BRX genes share high levels of similarity among each others, with several conserved domains. The most distinct is BRX domain - highly conserved in all BRX genes among distantly related species. This protein-protein interaction domain is required and sufficient for BRX activity.	protein_coding	BREVIS RADIX-LIKE 4 (BRXL4)	BREVIS RADIX-LIKE 4 (ATBRXL4); (BRX-LIKE4);BREVIS RADIX-LIKE 4 (BRXL4)	-0.440805	4.53702	13.1622	0.000285646
AT3G19590	AT3G19590.1	Encodes a protein that may have a role in the spindle assembly checkpoint.	protein_coding	BUB (BUDDING UNINHIBITED BY BENZYMIDAZOL) 3.1 (BUB3.1)	BUB (BUDDING UNINHIBITED BY BENZYMIDAZOL) 3.1 (BUB3.1)	-0.443361	3.72935	8.0767	0.00448379
AT3G47650	AT3G47650.1	DnaJ/Hsp40 cysteine-rich domain superfamily protein;(source:Araport11)	protein_coding	BUNDLE SHEATH DEFECTIVE 2 (BSD2)	BUNDLE SHEATH DEFECTIVE 2 (BSD2)	-0.413684	3.45797	7.76009	0.00534134
AT3G48250	AT3G48250.1	Encodes a pentatricopeptide repeat protein implicated in splicing of intron 1 of mitochondrial nad7 transcripts.	protein_coding	BUTHIONINE SULFOXIMINE-INSENSITIVE ROOTS 6 (BIR6)	BUTHIONINE SULFOXIMINE-INSENSITIVE ROOTS 6 (BIR6)	-0.899637	3.0263	20.0726	7.45566e-06
AT5G33320	AT5G33320.1	Encodes a plastid inner envelope protein PPT (phosphoenolpyruvate/phosphate translocator) that catalyzes the transport of phosphoenolpyruvate and phosphate across the inner envelope membrane of plastids. The mRNA is cell-to-cell mobile.	protein_coding	CAB UNDEREXPRESSED 1 (CUE1)	CAB UNDEREXPRESSED 1 (CUE1);PHOSPHOENOLPYRUVATE/PHOSPHATE TRANSLOCATOR (PPT);ARABIDOPSIS THALIANA PHOSPHATE/PHOSPHOENOLPYRUVATE TRANSLOCATOR (ARAPPT);NITROUS OXIDE OVEREXPRESSOR 1 (NOX1)	-0.471829	7.33621	14.7801	0.000120807
AT1G64980	AT1G64980.1	Encodes a putative nucleotide-diphospho-sugar transferase required for pollen germination and tube growth.	protein_coding	CADMIUM 2+ INDUCED (CDI)	CADMIUM 2+ INDUCED (CDI)	-0.439164	4.80184	13.9633	0.000186409
AT4G21940	AT4G21940.2	member of Calcium Dependent Protein Kinase	protein_coding	CALCIUM-DEPENDENT PROTEIN KINASE 15 (CPK15)	CALCIUM-DEPENDENT PROTEIN KINASE 15 (CPK15)	-1.10068	-0.381405	8.06428	0.00451464
AT2G27030	AT2G27030.3	encodes a calmodulin that has higher affinity to kinesin-like calmodulin binding motor protein than CAM4 or CAM6. The mRNA is cell-to-cell mobile.	protein_coding	CALMODULIN 5 (CAM5)	CALMODULIN 5 (CAM5)	-0.43785	6.83504	11.913	0.000557422
AT3G43810	AT3G43810.1	EF hand domain protein encodes a calmodulin. Can functionally complement a yeast CaM mutant.	protein_coding	CALMODULIN 7 (CAM7)	CALMODULIN 7 (CAM7);Z-BOX BINDING FACTOR 3 (ZBF3); (ATCAM7)	-0.44139	6.93402	13.8261	0.000200534
AT3G22930	AT3G22930.1	Encodes a calmodulin-like protein.	protein_coding	CALMODULIN-LIKE 11 (CML11)	(ATCML11);CALMODULIN-LIKE 11 (CML11)	-0.743362	3.31496	12.8074	0.000345249
AT5G61790	AT5G61790.1	calnexin 1;(source:Araport11)	protein_coding	CALNEXIN 1 (CNX1)	CALNEXIN 1 (CNX1); (CNX1); (ATCNX1)	-0.503561	8.55892	20.3875	6.32406e-06
AT1G56340	AT1G56340.1	Encodes one of three Arabidopsis calreticulins. In CRT-deficient mouse fibroblasts, this protein restores ER Ca2+ levels. Post-transcriptionally regulates together with CRT2 VAMP721/722 levels under ER stress. Loss-of-function results in activation of the ethylene signaling pathway, reduced susceptibility to Verticillium longisporum.	protein_coding	CALRETICULIN 1A (CRT1a)	(AtCRT1a);CALRETICULIN 1A (CRT1a);CALRETICULIN 1 (CRT1)	-0.340826	8.33862	8.48328	0.00358425
AT1G09210	AT1G09210.1	Encodes one of three Arabidopsis calreticulins.Post-transcriptionally regulates together with CRT1 VAMP721/722 levels under ER stress.	protein_coding	CALRETICULIN 1B (CRT1b)	CALRETICULIN 1B (CRT1b);CALRETICULIN 2 (CRT2); (AtCRT1b)	-0.378756	8.30542	12.8237	0.000342263
AT3G27740	AT3G27740.1	Encodes carbamoyl phosphate synthetase (CPS) small subunit (carA), also named as VEN6. Heterologous expression of the Arabidopsis VEN3 and VEN6 genes in a CPS-deficient Escherichia coli strain fully restored bacterial growth in minimal medium, demonstrating the enzymatic activity of the VEN3 and VEN6 proteins.	protein_coding	CARBAMOYL PHOSPHATE SYNTHETASE A (CARA)	VENOSA 6 (VEN6);CARBAMOYL PHOSPHATE SYNTHETASE A (CARA)	-0.258873	6.10702	8.36071	0.00383421
AT3G48700	AT3G48700.1	carboxyesterase 13;(source:Araport11)	protein_coding	CARBOXYESTERASE 13 (CXE13)	CARBOXYESTERASE 13 (CXE13);CARBOXYESTERASE 13 (ATCXE13)	-0.724343	2.62742	8.86832	0.00290163
AT5G16080	AT5G16080.1	carboxyesterase 17;(source:Araport11)	protein_coding	CARBOXYESTERASE 17 (CXE17)	CARBOXYESTERASE 17 (CXE17);CARBOXYESTERASE 17 (AtCXE17)	-1.25066	0.810186	11.7186	0.00061879
AT4G04870	AT4G04870.1	Encodes a protein with cardiolipin synthase activity that is localized to the mitochondiria.	protein_coding	CARDIOLIPIN SYNTHASE (CLS)	CARDIOLIPIN SYNTHASE (CLS)	-0.488068	3.87523	10.3682	0.00128205
AT2G35760	AT2G35760.1	Uncharacterized protein family (UPF0497);(source:Araport11)	protein_coding	CASP-LIKE PROTEIN 2B2 (CASPL2B2)	CASP-LIKE PROTEIN 2B2 (CASPL2B2)	-0.679224	2.49217	11.9397	0.000549509
AT2G39518	AT2G39518.1	Uncharacterized protein family (UPF0497);(source:Araport11)	protein_coding	CASP-LIKE PROTEIN 4D2 (CASPL4D2)	CASP-LIKE PROTEIN 4D2 (CASPL4D2)	-0.545878	4.4447	9.76261	0.00178097
AT4G23700	AT4G23700.1	member of Putative Na+/H+ antiporter family	protein_coding	CATION/H+ EXCHANGER 17 (CHX17)	CATION/H+ EXCHANGER 17 (CHX17);CATION/H+ EXCHANGER 17 (ATCHX17)	-1.0674	5.72898	19.6791	9.15974e-06
AT2G27970	AT2G27970.1	CDK-subunit 2;(source:Araport11)	protein_coding	CDK-SUBUNIT 2 (CKS2)	CDK-SUBUNIT 2 (CKS2)	-0.404984	4.80533	9.4509	0.00211045
AT1G71380	AT1G71380.1	cellulase 3;(source:Araport11)	protein_coding	CELLULASE 3 (CEL3)	ARABIDOPSIS THALIANA GLYCOSYL HYDROLASE 9B3 (ATGH9B3);CELLULASE 3 (CEL3);CELLULASE 3 (ATCEL3)	-0.631699	2.77254	13.879	0.000194961
AT5G22740	AT5G22740.1	Encodes a beta-mannan synthase based on in vitro enzyme assays from heterologously expressed protein. CSLA2 synthesizes the backbone of galactoglucomannan in seed coat epidermal cells. Both CSLA2 and MUCI10, which may be part of a protein complex, are critical for mucilage architecture.	protein_coding	CELLULOSE SYNTHASE-LIKE A02 (CSLA02)	ARABIDOPSIS THALIANA CELLULOSE SYNTHASE-LIKE A02 (ATCSLA02);CELLULOSE SYNTHASE-LIKE A02 (CSLA02);CELLULOSE SYNTHASE-LIKE A 2 (CSLA2); (ATCSLA2);ARABIDOPSIS THALIANA CELLULOSE SYNTHASE-LIKE A2 (ATCSLA2)	-0.377635	7.83248	16.6769	4.43183e-05
AT4G31590	AT4G31590.1	encodes a XyG glucan synthase; gene similar to cellulose synthase	protein_coding	CELLULOSE-SYNTHASE-LIKE C5 (CSLC5)	CELLULOSE-SYNTHASE LIKE C5 (ATCSLC05);CELLULOSE-SYNTHASE-LIKE C5 (CSLC5);CELLULOSE-SYNTHASE-LIKE C5 (ATCSLC5);CELLULOSE-SYNTHASE LIKE C5 (CSLC05)	-0.334456	5.49142	10.4858	0.00120294
AT2G27550	AT2G27550.1	encodes a protein similar to TFL1. overexpression leads to similar phenotype as TFL1 overexpression. expressed specifically in the hypocotyl and null mutation does not result in phenotypes exhibited by TFL1 null mutations. It acts non-cell autonomously to inhibit floral initiation.	protein_coding	CENTRORADIALIS (ATC)	CENTRORADIALIS (ATC)	-2.11926	4.25244	15.2627	9.35464e-05
AT3G23840	AT3G23840.1	HXXXD-type acyl-transferase family protein;(source:Araport11)	protein_coding	CER26-LIKE (CER26-LIKE)	(ATPNP-R1);CER26-LIKE (CER26-LIKE)	-1.30884	-0.109627	8.84912	0.0029323
AT5G05270	AT5G05270.1	Chalcone-flavanone isomerase family protein;(source:Araport11)	protein_coding	CHALCONE ISOMERASE LIKE (CHIL)	(ATCHIL);CHALCONE ISOMERASE LIKE (CHIL)	-1.61796	6.86044	41.9763	9.23858e-11
AT1G14980	AT1G14980.1	Encodes mitochondrial-localized chaperonin 10 that complements the E.coli groES mutant. Its mRNA is upregulated in response to heat shock treatment and is expressed uniformly in various organs.	protein_coding	CHAPERONIN 10 (CPN10)	CHAPERONIN 10 (CPN10)	-0.334996	7.07164	9.27212	0.00232668
AT3G03960	AT3G03960.1	TCP-1/cpn60 chaperonin family protein;(source:Araport11)	protein_coding	CHAPERONIN CONTAINING T-COMPLEX POLYPEPTIDE-1 SUBUNIT 8 (CCT8)	CHAPERONIN CONTAINING T-COMPLEX POLYPEPTIDE-1 SUBUNIT 8 (CCT8)	-0.378914	7.53084	9.73108	0.00181178
AT3G63140	AT3G63140.1	Encodes a protein with ribonuclease activity that is involved in plastid rRNA maturation.	protein_coding	CHLOROPLAST STEM-LOOP BINDING PROTEIN OF 41 KDA (CSP41A)	CHLOROPLAST STEM-LOOP BINDING PROTEIN OF 41 KDA (CSP41A)	-0.78099	2.97432	8.5485	0.00345806
AT4G39330	AT4G39330.1	cinnamyl alcohol dehydrogenase 9;(source:Araport11)	protein_coding	CINNAMYL ALCOHOL DEHYDROGENASE 9 (CAD9)	CINNAMYL ALCOHOL DEHYDROGENASE 9 (CAD9); (ATCAD9)	-0.769917	2.85345	9.18909	0.00243462
AT3G28455	AT3G28455.1	Member of a large family of putative ligands homologous to the Clavata3 gene. Consists of a single exon. Can not replace CLV3 function in vivo.CLE25 participates in long distance signaling in response to dehydration. It produces a graft transmissible signal from root to shoot that induces ABA synthesis and results in stomatal closure. The BAM1 and BAM3 receptor-kinases are likely receptors for CL…	protein_coding	CLAVATA3/ESR-RELATED 25 (CLE25)	CLAVATA3/ESR-RELATED 25 (CLE25)	-0.608256	2.51837	11.9656	0.000541915
AT3G24770	AT3G24770.1	Belongs to a large gene family, called CLE for CLAVATA3/ESR-related, encoding small peptides with conserved carboxyl termini. The C-terminal 12 amino acid sequence of CLE41 is identical to that of a dodeca peptide (TDIF, tracheary element differentiation inhibitory factor) isolated from Arabidopsis and functions as a suppressor of plant stem cell differentiation. TDIF sequence is also identical t…	protein_coding	CLAVATA3/ESR-RELATED 41 (CLE41)	CLAVATA3/ESR-RELATED 41 (CLE41)	-0.731254	4.08385	22.3982	2.21576e-06
AT2G31085	AT2G31085.1	Member of a large family of putative ligands homologous to the Clavata3 gene. Consists of a single exon. Can replace CLV3 function in vivo.	protein_coding	CLAVATA3/ESR-RELATED 6 (CLE6)	(AtCLE6);CLAVATA3/ESR-RELATED 6 (CLE6)	-0.938701	2.75884	19.1123	1.23247e-05
AT5G23880	AT5G23880.1	Encodes a protein similar to the 100kD subunit of cleavage and polyadenylation specificity factor (CPSF), the factor responsible for the recognition of the AAUAAA motif during mRNA polyadenylation. The protein interacts with a portion of a nuclear poly(A) polymerase. It is likely to be a part of the mRNA 3'end formation apparatus.	protein_coding	CLEAVAGE AND POLYADENYLATION SPECIFICITY FACTOR 100 (CPSF100)	EMBRYO DEFECTIVE 1265 (EMB1265);CLEAVAGE AND POLYADENYLATION SPECIFICITY FACTOR 100 (ATCPSF100);ENHANCED SILENCING PHENOTYPE 5 (ESP5);CLEAVAGE AND POLYADENYLATION SPECIFICITY FACTOR 100 (CPSF100)	-0.405115	4.76643	11.0339	0.000894598
AT5G60920	AT5G60920.1	Encodes a glycosylphosphatidylinositol-anchored protein localized primarily in the plasma membrane of the longitudinal sides of root cells. Necessary for oriented cell expansion in Arabidopsis. Cob mutants have abnormal roots that expand radially rather than longitudinally under certain growth conditions.	protein_coding	COBRA (COB)	COBRA (COB)	-0.286941	8.05421	11.5282	0.000685475
AT4G16120	AT4G16120.1	putative membrane-anchored cell wall protein	protein_coding	COBRA-LIKE PROTEIN-7 PRECURSOR (COBL7)	ARABIDOPSIS THALIANA SEC61 BETA 1 (ATSEB1);SEC61 BETA 1 (SEB1);COBRA-LIKE PROTEIN-7 PRECURSOR (COBL7)	-0.355237	4.64924	9.0965	0.00256099
AT5G42860	AT5G42860.1	CC2 is a plant specific gene that interacts with with the cellulose synthase complex and microtubules. It appears to play a role in localizing CESA to the membrane, microtuble dynamics , particularly during salt stress.	protein_coding	COMPANION OF CELLULOSE SYNTHASE 2 (CC2)	COMPANION OF CELLULOSE SYNTHASE 2 (CC2)	-0.482251	5.43254	10.6818	0.00108196
AT5G11980	AT5G11980.1	COG8 is a component of a putative conserved oligomeric Golgi (COG) complex that is thought to be involved in tethering of retrograde intra Golgi vesicles. It is required for proper deposition of cell wall materials in pollen tube growth. In mutant pollen,golgi appear abnormal.When homozygotes can be produced (by complementing the defect in pollen), the plants are embryo lethal suggesting an essen…	protein_coding	CONSERVED OLIGOMERIC GOLGI COMPLEX 8 (COG8)	CONSERVED OLIGOMERIC GOLGI COMPLEX 8 (COG8)	-0.293488	5.44213	9.69013	0.00185261
AT3G24506	AT3G24506.1	Participates in the late stages of the biogenesis of 50S ribosomal subunits in plastids.	protein_coding	CONSERVED ONLY IN THE GREEN LINEAGE20B (CGL20B)	CONSERVED ONLY IN THE GREEN LINEAGE20B (CGL20B)	-0.331963	4.39952	9.78214	0.00176215
AT5G63440	AT5G63440.2	Encodes a single copy protein in Arabidopsis containing a DUF167 domain that is conserved in eukaryotes. Genetically CSU suppresses mutations in COP1. In vitro, it interacts with CACTIN and in vivo with CCA1. CSU4 promotes photomorphogenesis via negative regulation of CCA1 and PIF4 expression.	protein_coding	COP1 SUPPRESSOR 4 (CSU4)	COP1 SUPPRESSOR 4 (CSU4);CACTIN (CTN)	-0.392269	3.5675	7.76853	0.00531642
AT1G08830	AT1G08830.1	Encodes a cytosolic copper/zinc superoxide dismutase CSD1 that can detoxify superoxide radicals. Its expression is affected by miR398-directed mRNA cleavage. Regulated by biotic and abiotic stress. Activation of CSD1 in the cytoplasm involves both a CCS-dependent and -independent pathway.	protein_coding	COPPER/ZINC SUPEROXIDE DISMUTASE 1 (CSD1)	COPPER/ZINC SUPEROXIDE DISMUTASE 1 (CSD1);SUPEROXIDE DISMUTASE 1 (SOD1);SUPEROXIDE DISMUTASE 1 (ATSOD1)	-0.26737	9.35399	8.22206	0.00413842
AT5G65810	AT5G65810.1	Encodes CGR3 (cotton Golgi-related 3). CGR3 and a close homologue CGR2 have overlapping roles in pectin methylesterification and plant growth.	protein_coding	COTTON GOLGI-RELATED 3 (CGR3)	COTTON GOLGI-RELATED 3 (CGR3)	-0.35555	5.58205	10.5829	0.00114137
AT1G30820	AT1G30820.1	Cytidine triphosphate synthase.	protein_coding	CTP SYNTHASE 1 (CTPS1)	CTP SYNTHASE 1 (CTPS1)	-0.923395	8.06239	22.1295	2.54861e-06
AT4G20320	AT4G20320.1	Cytidine triphosphate synthase.	protein_coding	CTP SYNTHASE 4 (CTPS4)	CTP SYNTHASE 4 (CTPS4)	-0.443946	6.47103	13.8655	0.000196372
AT1G47230	AT1G47230.2	Post-prophase target of anaphase promoting complex/cyclosome E3-ligase controlling formative cell divisions.	protein_coding	CYCLIN A3;4 (CYCA3;4)	CYCLIN A3;4 (CYCA3;4)	-0.472342	4.04913	15.7294	7.30781e-05
AT4G34160	AT4G34160.1	encodes a cyclin D-type protein involved in the switch from cell proliferation to the final stages of differentiation. The gene is transcriptionally regulated by cytokinin and brassinosteroid. Protein interacts with cyclin-dependent kinase inhibitor ICK1.	protein_coding	CYCLIN D3;1 (CYCD3;1)	(CYCD3);CYCLIN D3;1 (CYCD3;1)	-0.61246	5.29669	23.9563	9.85477e-07
AT5G27620	AT5G27620.1	core cell cycle genes The mRNA is cell-to-cell mobile.	protein_coding	CYCLIN H;1 (CYCH;1)	CYCLIN H;1 (CYCH;1)	-0.439086	3.92225	10.6855	0.00107981
AT2G29960	AT2G29960.1	encodes a cyclophilin protein that exhibits peptidylprolyl cis/trans-isomerase and protein refolding activities that were sensitive to cyclosporin A. The protein interacts with GNOM in vitro and is localized to both the cytosolic and membrane fractions. The gene is expressed in the developing embryo.	protein_coding	CYCLOPHILIN 5 (CYP5)	CYCLOPHILIN 5 (CYP5);CYCLOPHILIN 19-4 (CYP19-4);ARABIDOPSIS THALIANA CYCLOPHILIN 5 (ATCYP5)	-0.27609	6.56828	9.34129	0.00224048
AT5G12140	AT5G12140.1	Encodes a cystatin.	protein_coding	CYSTATIN-1 (CYS1)	CYSTATIN-1 (ATCYS1);CYSTATIN-1 (CYS1)	-0.294295	7.23025	11.0165	0.000903039
AT3G48350	AT3G48350.1	Involved in starvation-related responses that curtail primary root growth under severe nutrient limitation.	protein_coding	CYSTEINE ENDOPEPTIDASE 3 (CEP3)	CYSTEINE ENDOPEPTIDASE 3 (CEP3)	-0.533788	4.73875	11.1541	0.000838454
AT2G31170	AT2G31170.1	Encodes the cysteinyl t-RNA synthetase SYCO ARATH (SYCO), which is expressed and required in the central cell but not in the antipodals. SYCO, localized to the mitochondria, is necessary for mitochondrial cristae integrity. Mutation of this gene affects the lifespan of adjacent accessory cells.	protein_coding	CYSTEINYL T-RNA SYNTHETASE (SYCO ARATH)	FIONA (FIONA);CYSTEINYL T-RNA SYNTHETASE (SYCO ARATH)	-0.589982	3.41384	13.5126	0.000236964
AT2G32720	AT2G32720.1	Participates with ELO2 in VLCFA synthesis.	protein_coding	CYTOCHROME B5 ISOFORM B (CB5-B)	(B5 #4); (CYTB5-D);CYTOCHROME B5 ISOFORM B (CB5-B);ARABIDOPSIS CYTOCHROME B5 ISOFORM B (ATCB5-B)	-0.625955	5.55614	23.9839	9.71436e-07
AT5G56090	AT5G56090.1	Encodes a homolog of COX15. Microarray analysis show a 3.2 fold increase in transcription after treatment with rotenone, an electron transport chain inhibitor.	protein_coding	CYTOCHROME C OXIDASE 15 (COX15)	CYTOCHROME C OXIDASE 15 (COX15)	-0.422402	5.37268	12.5922	0.000387351
AT3G15352	AT3G15352.1	Encodes protein similar to yeast COX17, a copper-binding protein that mediates the delivery of Cu to the mitochondria for the assembly of a functional cytochrome oxidase complex.	protein_coding	CYTOCHROME C OXIDASE 17 (COX17)	CYTOCHROME C OXIDASE 17 (COX17);ARABIDOPSIS THALIANA CYTOCHROME C OXIDASE 17 (ATCOX17)	-0.491769	3.68983	10.2524	0.00136506
AT3G20100	AT3G20100.1	member of CYP705A The mRNA is cell-to-cell mobile.	protein_coding	CYTOCHROME P450, FAMILY 705, SUBFAMILY A, POLYPEPTIDE 19 (CYP705A19)	CYTOCHROME P450, FAMILY 705, SUBFAMILY A, POLYPEPTIDE 19 (CYP705A19)	-0.411434	6.52227	8.43838	0.00367384
AT3G20110	AT3G20110.1	member of CYP705A	protein_coding	CYTOCHROME P450, FAMILY 705, SUBFAMILY A, POLYPEPTIDE 20 (CYP705A20)	CYTOCHROME P450, FAMILY 705, SUBFAMILY A, POLYPEPTIDE 20 (CYP705A20)	-1.40909	4.46963	36.5393	1.49622e-09
AT4G13290	AT4G13290.1	putative cytochrome P450	protein_coding	CYTOCHROME P450, FAMILY 71, SUBFAMILY A, POLYPEPTIDE 19 (CYP71A19)	CYTOCHROME P450, FAMILY 71, SUBFAMILY A, POLYPEPTIDE 19 (CYP71A19)	-0.733162	6.26187	14.6477	0.000129589
AT4G20240	AT4G20240.1	putative cytochrome P450	protein_coding	CYTOCHROME P450, FAMILY 71, SUBFAMILY A, POLYPEPTIDE 27 (CYP71A27)	CYTOCHROME P450, FAMILY 71, SUBFAMILY A, POLYPEPTIDE 27 (CYP71A27)	-0.813172	4.71761	16.152	5.84574e-05
AT1G67110	AT1G67110.1	cytochrome P450, family 735, subfamily A, polypeptide 2;(source:Araport11)	protein_coding	CYTOCHROME P450, FAMILY 735, SUBFAMILY A, POLYPEPTIDE 2 (CYP735A2)	CYTOCHROME P450, FAMILY 735, SUBFAMILY A, POLYPEPTIDE 2 (CYP735A2)	-1.03484	4.89549	28.3036	1.03704e-07
AT1G01190	AT1G01190.1	cytochrome P450, family 78, subfamily A, polypeptide 8;(source:Araport11)	protein_coding	CYTOCHROME P450, FAMILY 78, SUBFAMILY A, POLYPEPTIDE 8 (CYP78A8)	CYTOCHROME P450, FAMILY 78, SUBFAMILY A, POLYPEPTIDE 8 (CYP78A8)	-1.20006	4.61192	11.249	0.000796642
AT2G22330	AT2G22330.1	Encodes a cytochrome P450. Involved in tryptophan metabolism. Converts Trp to indole-3-acetaldoxime (IAOx), a precursor to IAA and indole glucosinolates. The mRNA is cell-to-cell mobile.	protein_coding	CYTOCHROME P450, FAMILY 79, SUBFAMILY B, POLYPEPTIDE 3 (CYP79B3)	CYTOCHROME P450, FAMILY 79, SUBFAMILY B, POLYPEPTIDE 3 (CYP79B3)	-0.775316	8.37299	10.5605	0.00115533
AT4G31500	AT4G31500.1	Encodes an oxime-metabolizing enzyme in the biosynthetic pathway of glucosinolates. Is required for phytochrome signal transduction in red light. Mutation confers auxin overproduction.	protein_coding	CYTOCHROME P450, FAMILY 83, SUBFAMILY B, POLYPEPTIDE 1 (CYP83B1)	CYTOCHROME P450, FAMILY 83, SUBFAMILY B, POLYPEPTIDE 1 (CYP83B1);SUPERROOT 2 (SUR2);ALTERED TRYPTOPHAN REGULATION 4 (ATR4);RED ELONGATED 1 (RED1);RUNT 1 (RNT1)	-0.716906	8.46968	8.63195	0.00330318
AT1G12740	AT1G12740.2	encodes a protein with cytochrome P450 domain	protein_coding	CYTOCHROME P450, FAMILY 87, SUBFAMILY A, POLYPEPTIDE 2 (CYP87A2)	CYTOCHROME P450, FAMILY 87, SUBFAMILY A, POLYPEPTIDE 2 (CYP87A2)	-0.854477	6.55909	26.5142	2.61613e-07
AT4G29740	AT4G29740.2	It encodes a protein whose sequence is similar to cytokinin oxidase/dehydrogenase, which catalyzes the degradation of cytokinins.	protein_coding	CYTOKININ OXIDASE 4 (CKX4)	(ATCKX4);CYTOKININ OXIDASE 4 (CKX4)	-0.390838	5.51946	8.54763	0.00345972
AT4G27950	AT4G27950.1	Encodes a member of the ERF (ethylene response factor) subfamily B-5 of ERF/AP2 transcription factor family. The protein contains one AP2 domain. There are 7 members in this subfamily. CRF proteins relocalize to the nucleus in response to cytokinin.	protein_coding	CYTOKININ RESPONSE FACTOR 4 (CRF4)	CYTOKININ RESPONSE FACTOR 4 (CRF4)	-0.465522	3.81318	7.87552	0.00501084
AT3G44326	AT3G44326.1	Cytokinin induced F-Box protein. Forms a unique F-Box family with AT2G27310 and AT2G36090. It is primarily expressed in the root.	protein_coding	CYTOKININ-INDUCED F-BOX (CFB)	CYTOKININ-INDUCED F-BOX (CFB)	-0.540866	4.60389	8.10403	0.0044167
AT4G02850	AT4G02850.1	DAAR1 encodes a PLP-independent racemase that catalyzes the conversion from L-Ile to D-allo-Ile.	protein_coding	D-AMINO ACID RACEMASE1 (DAAR1)	(DEG20);D-AMINO ACID RACEMASE1 (DAAR1)	-1.4576	3.77364	32.2694	1.34209e-08
AT1G77030	AT1G77030.1	Required for functional maturation of male and female gametophytes.	protein_coding	DEAD-BOX RNA HELICASE 29 (RH29)	DEAD-BOX RNA HELICASE 29 (RH29)	-0.416175	5.67333	12.8639	0.00033498
AT5G36950	AT5G36950.1	Encodes a putative DegP protease.	protein_coding	DEGRADATION OF PERIPLASMIC PROTEINS 10 (DEG10)	DEGP PROTEASE 10 (DegP10);DEGRADATION OF PERIPLASMIC PROTEINS 10 (DEG10)	-0.420235	4.12904	13.1096	0.000293789
AT3G12930	AT3G12930.1	Encodes a novel conserved chloroplast protein that interacts with components of the PEP complex. Mutants show delayed greening and reduced photosynthetic capcity.	protein_coding	DELAYED GREENING 238 (DG238)	DELAYED GREENING 238 (DG238)	-0.484119	3.90182	12.4428	0.000419605
AT1G72040	AT1G72040.1	Encodes a multisubstrate deoxyribonucleoside kinase that salvages DNA precursors.	protein_coding	DEOXYRIBONUCLEOSIDE KINASE (DNK)	(ATDNK);DEOXYRIBONUCLEOSIDE KINASE (DNK)	-0.263215	5.34602	8.26085	0.00405092
AT4G25640	AT4G25640.2	Encodes a multidrug and toxin efflux family transporter. Involved in flavonoid metabolism, affecting Root growth, seed development and germination, and pollen development, release and viability.	protein_coding	DETOXIFYING EFFLUX CARRIER 35 (DTX35)	DETOXIFYING EFFLUX CARRIER 35 (DTX35)	-0.773077	8.03092	19.6096	9.49921e-06
AT1G30825	AT1G30825.1	Involved in trichome maturation. mutant displays enlarged trichomes	protein_coding	DISTORTED TRICHOMES 2 (DIS2)	DISTORTED TRICHOMES 2 (DIS2);ACTIN-RELATED PROTEIN C2A (ARPC2A)	-0.467288	3.73459	14.2868	0.000156961
AT4G39800	AT4G39800.1	** Referred to as MIPS2 in Mitsuhashi et al 2008. myo-inositol-1-phosphate synthase isoform 1.Expressed in leaf, root and silique. Immunolocalization experiments with an antibody recognizing MIPS1, MIPS2, and MIPS3 showed endosperm localization.	protein_coding	D-MYO-INOSITOL 3-PHOSPHATE SYNTHASE 1 (MIPS1)	MYO-INOSITOL-1-PHOSPHATE SYNTHASE 1 (MIPS1);D-MYO-INOSITOL 3-PHOSPHATE SYNTHASE 1 (MIPS1);INOSITOL 3-PHOSPHATE SYNTHASE 1 (ATIPS1);MYO-INOSITOL-1-PHOSPHATE SYNTHASE 2 (MIPS2);MYO-INOSITOL-1-PHOSTPATE SYNTHASE 2 (ATMIPS2); (MI-1-P SYNTHASE);MYO-INOSITOL-1-PHOSPHATE SYNTHASE 1 (ATMIPS1)	-0.678196	6.18352	31.4305	2.06709e-08
AT2G25620	AT2G25620.1	Encodes DBP1, a member of the DBP factors (DNA-binding protein phosphatases) featuring sequence-specific DNA-binding and protein phosphatase activity. DBP1 is involved in plant-potyvirus interactions. Loss-of-function of DBP1 renders resistance to potyviruses. Negatively regulates drought and salt tolerance through altering leaf surface permeability.	protein_coding	DNA-BINDING PROTEIN PHOSPHATASE 1 (DBP1)	DNA-BINDING PROTEIN PHOSPHATASE 1 (DBP1);DNA-BINDING PROTEIN PHOSPHATASE 1 (AtDBP1)	-0.50128	4.67634	9.43257	0.00213166
AT2G28510	AT2G28510.1	DOF transcription factor with a conserved zinc finger (ZF) DNA-binding domain.	protein_coding	DOF PROTEIN 2.1 (DOF2.1)	DOF PROTEIN 2.1 (DOF2.1)	-0.372709	5.72684	8.68753	0.00320395
AT1G74340	AT1G74340.1	Encodes a subunit of the dolichol phosphate mannase synthase (DPMS) complex that may serve as membrane anchors for the catalytic core, DPMS1, or provide catalytic assistance. It is localized in the ER and mediates isoprenyl-linked glycan biogenesis.	protein_coding	DOLICHOL PHOSPHATE MANNOSE SYNTHASE 2 (DPMS2)	DOLICHOL PHOSPHATE MANNOSE SYNTHASE 2 (DPMS2)	-0.319685	4.11754	7.93988	0.0048357
AT5G17460	AT5G17460.2	glutamyl-tRNA (Gln) amidotransferase subunit C;(source:Araport11)	protein_coding	DROUGHT AND FREEZING RESPONSIVE GENE 1 (DFR1)	DROUGHT AND FREEZING RESPONSIVE GENE 1 (DFR1)	-0.445837	6.71615	8.89627	0.00285753
AT2G28380	AT2G28380.1	Encodes a cytoplasmic dsRNA-binding protein DRB2. A maternally expressed imprinted gene. DRB2 and DRB4 have an antagonistic impact on polymerase IV-dependent siRNA levels.	protein_coding	DSRNA-BINDING PROTEIN 2 (DRB2)	(ATDRB2);DSRNA-BINDING PROTEIN 2 (DRB2)	-0.315318	5.43938	9.23576	0.00237333
AT5G45010	AT5G45010.1	Member of the intrinsically disordered protein family, interacts with different protein partners forming complexes involved in diverse biological mechanisms such as DNA repair, regulation of protein homeostasis, mRNA export. Role in the post-translational protein modification named DSSylation. Involved in molecular mechanisms underlying plant abiotic stress responses.	protein_coding	DSS1 HOMOLOG ON CHROMOSOME V (DSS1(V))	DSS1 HOMOLOG ON CHROMOSOME V (DSS1(V));DSS1 HOMOLOG ON CHROMOSOME V (ATDSS1(V))	-0.308424	5.50961	9.23884	0.00236934
AT3G46940	AT3G46940.1	DUTP-PYROPHOSPHATASE-LIKE 1;(source:Araport11)	protein_coding	DUTP-PYROPHOSPHATASE-LIKE 1 (DUT1)	DUTP-PYROPHOSPHATASE-LIKE 1 (DUT1)	-0.716507	3.94252	10.0943	0.00148731
AT5G54510	AT5G54510.1	Encodes an IAA-amido synthase that conjugates Ala, Asp, Phe, and Trp to auxin. Lines overexpressing this gene accumulate IAA-ASP and are hypersensitive to several auxins. Identified as a dominant mutation that displays shorter hypocotyls in light grown plants when compared to wild type siblings. Protein is similar to auxin inducible gene from pea (GH3).	protein_coding	DWARF IN LIGHT 1 (DFL1)	DWARF IN LIGHT 1 (DFL1);GRETCHEN HAGEN3.6 (GH3.6)	-0.411404	5.05236	12.3941	0.000430694
AT1G03055	AT1G03055.1	Encodes the ortholog of rice D27. It is plastid-localized and is required for the inhibition of secondary bud outgrowth and operates on a nonmobile precursor upstream of MAX1 in the SL biosynthesis pathway.	protein_coding	DWARF27 (D27)	A. THALIANA HOMOLOG OF RICE D27 (ATD27);DWARF27 (D27)	-1.84764	-0.891428	10.3416	0.00130066
AT5G50100	AT5G50100.1	Encodes a putative thioredoxin DCC1 involved in determining shoot regeneration capacity. It interacts directly with CARBONIC ANHYDRASE 2 (CA2), an essential subunit of respiratory chain NADH dehydrogenase complex (Complex I) and regulates Complex I activity via redox modification of CA2.	protein_coding	DXXCXXC MOTIF 1 (DCC1)	DXXCXXC MOTIF 1 (DCC1)	-0.497169	4.16617	11.713	0.000620659
AT2G15690	AT2G15690.1	Encodes an atypical PPR-DYW protein containing five predicted PPR domains and a C-terminal DYW domain separated by an amino acid sequence that do not clearly correspond to an E domain. It is expressed in both the mitochondrion and chloroplast and is also involved in RNA editing in the mitochondrion and chloroplast as a core member of E+-type PPR editosomes.	protein_coding	DYW DOMAIN PROTEIN 2 (DYW2)	(BLX);DYW DOMAIN PROTEIN 2 (DYW2)	-0.3889	4.66839	8.64888	0.00327262
AT4G12480	AT4G12480.1	Encodes a putative lipid transfer protein, vernalization-responsive and cold-induced. It is involved in priming the SAR and ISR responses, specifically in propagating the cell-to-cell mobile signal. The kinases MPK3 (AT3G45640) and MPK6 (AT2G43790) promote the accumulation of AZI1/EARLI1 at plastids during defense priming induction. The kinases MPK3 (AT3G45640) and MPK6 (AT2G43790) promote the ac…	protein_coding	EARLY ARABIDOPSIS ALUMINUM INDUCED 1 (EARLI1)	(pEARLI 1);EARLY ARABIDOPSIS ALUMINUM INDUCED 1 (EARLI1)	-0.539604	8.49217	11.7065	0.000622824
AT4G12880	AT4G12880.1	early nodulin-like protein 19;(source:Araport11)	protein_coding	EARLY NODULIN-LIKE PROTEIN 19 (ENODL19)	EARLY NODULIN-LIKE PROTEIN 19 (ENODL19); (AtENODL19)	-0.644671	6.40982	19.2135	1.16882e-05
AT4G27520	AT4G27520.1	early nodulin-like protein 2;(source:Araport11)	protein_coding	EARLY NODULIN-LIKE PROTEIN 2 (ENODL2)	(AtENODL2);EARLY NODULIN-LIKE PROTEIN 2 (ENODL2)	-0.601379	6.00345	19.3306	1.09933e-05
AT3G30775	AT3G30775.1	Encodes a proline oxidase that is predicted to localize to the inner mitochondrial membrane, its mRNA expression induced by high levels of Al and by osmotic stress. The promoter contains an L-proline-inducible element.	protein_coding	EARLY RESPONSIVE TO DEHYDRATION 5 (ERD5)	EARLY RESPONSIVE TO DEHYDRATION 5 (ERD5);PROLINE DEHYDROGENASE (PRODH); (AT-POX);PROLINE DEHYDROGENASE 1 (PDH1); (ATPDH); (PRO1);ARABIDOPSIS THALIANA PROLINE OXIDASE (ATPOX)	-0.946019	8.84433	25.234	5.07794e-07
AT1G10370	AT1G10370.1	Encodes GSTU17 (Glutathione S-Transferase U17). Functions as a negative component of stress-mediated signal transduction pathways in drought and salt stress responses.	protein_coding	EARLY-RESPONSIVE TO DEHYDRATION 9 (ERD9)	GLUTATHIONE S-TRANSFERASE 30 (GST30);GLUTATHIONE S-TRANSFERASE TAU 17 (ATGSTU17);GLUTATHIONE S-TRANSFERASE 30B (GST30B);EARLY-RESPONSIVE TO DEHYDRATION 9 (ERD9);GLUTATHIONE S-TRANSFERASE U17 (GSTU17)	-1.7234	5.43681	54.8323	1.31265e-13
[truncated: 497 more rows]

## Sheet: S5 Shoot +Ti vs Ctrl Up 10D
Locus Identifier	Gene Model Name	Gene Model Description	Gene Model Type	Primary Gene Symbol	All Gene Symbols	logFC	logCPM	LR	PValue
[truncated: 57 more rows]

[truncated: 4 more sheets: S6 Shoot +Ti vs Ctrl Down 10D, S7 top 100 GOs in roots at 10 D, S8 top 100 Gos in shoot at 10D, S9 RT-qPCRs primers]
